# Supplementary material
Source: Research Square preprint supplement (doi:10.21203/rs.3.rs-8693915/v1)
Supplement: Supplementary file 1 [file 95a383b19fdce8cbf027ab94.xlsx]

## Sheet: Tablib Dataset
ID	FoldChange	Log2FoldChange	Uniprot	Genename	Biological Process	Cell Component	Molecular Function	KEGG Pathways	Disease	Drug	UNIPROT_URL	Transcription Factor
Q99496	63.7786	5.995	Q99496	RNF2	GO:0080090,regulation of primary metabolic process|GO:0019222,regulation of metabolic process|GO:0010390,histone monoubiquitination|GO:0048468,cell development|GO:1901362,organic cyclic compound biosynthetic process|GO:0071840,cellular component organization or biogenesis|GO:0044710,single-organism metabolic process|GO:0010605,negative regulation of macromolecule metabolic process|GO:0000003,repr…	GO:0035102,PRC1 complex|GO:0031974,membrane-enclosed lumen|GO:0000151,ubiquitin ligase complex|GO:0043229,intracellular organelle|GO:0043228,non-membrane-bounded organelle|GO:0000785,chromatin|GO:0000152,nuclear ubiquitin ligase complex|GO:0000228,nuclear chromosome|GO:0043227,membrane-bounded organelle|GO:0043226,organelle|GO:0034708,methyltransferase complex|GO:0016604,nuclear body|GO:0031519,P…	GO:0019787,ubiquitin-like protein transferase activity|GO:0043169,cation binding|GO:0046872,metal ion binding|GO:0046914,transition metal ion binding|GO:0016874,ligase activity|GO:0061630,ubiquitin protein ligase activity|GO:0071535,RING-like zinc finger domain binding|GO:0043167,ion binding|GO:0003824,catalytic activity|GO:0016740,transferase activity|GO:0044877,macromolecular complex binding|GO…				http://www.uniprot.org/uniprot/Q99496	False
Q6FGY1	44.4774	5.475	Q6FGY1	HPCAL1			GO:0043169,cation binding|GO:0043167,ion binding|GO:0005488,binding|GO:0046872,metal ion binding|GO:0005509,calcium ion binding				http://www.uniprot.org/uniprot/Q6FGY1	False
P61088	23.5556	4.558	P61088	UBE2N	GO:0019221,cytokine-mediated signaling pathway|GO:0019222,regulation of metabolic process|GO:0048584,positive regulation of response to stimulus|GO:0048583,regulation of response to stimulus|GO:0031349,positive regulation of defense response|GO:0007165,signal transduction|GO:0007166,cell surface receptor signaling pathway|GO:0031056,regulation of histone modification|GO:0031058,positive regulatio…	GO:0035370,UBC13-UEV1A complex|GO:0043229,intracellular organelle|GO:0043227,membrane-bounded organelle|GO:0043226,organelle|GO:0005737,cytoplasm|GO:0031982,vesicle|GO:0005634,nucleus|GO:0031988,membrane-bounded vesicle|GO:1902494,catalytic complex|GO:1990234,transferase complex|GO:0032991,macromolecular complex|GO:1903561,extracellular vesicle|GO:0031371,ubiquitin conjugating enzyme complex|GO:0…	GO:0044389,ubiquitin-like protein ligase binding|GO:0035639,purine ribonucleoside triphosphate binding|GO:0019899,enzyme binding|GO:0005488,binding|GO:0003676,nucleic acid binding|GO:0043167,ion binding|GO:1901363,heterocyclic compound binding|GO:0001883,purine nucleoside binding|GO:0001882,nucleoside binding|GO:0019787,ubiquitin-like protein transferase activity|GO:0016874,ligase activity|GO:000…	hsa04120,Ubiquitin mediated proteolysis			http://www.uniprot.org/uniprot/P61088	False
Q9NPH2	18.2143	4.187	Q9NPH2	ISYNA1	GO:0044237,cellular metabolic process|GO:0046173,polyol biosynthetic process|GO:0019751,polyol metabolic process|GO:0044249,cellular biosynthetic process|GO:0044281,small molecule metabolic process|GO:0044283,small molecule biosynthetic process|GO:0044699,single-organism process|GO:1901576,organic substance biosynthetic process|GO:0044710,single-organism metabolic process|GO:0044711,single-organi…	GO:0005737,cytoplasm|GO:0005829,cytosol|GO:0044464,cell part|GO:0005623,cell|GO:0005622,intracellular|GO:0044444,cytoplasmic part|GO:0044424,intracellular part	GO:0004512,inositol-3-phosphate synthase activity|GO:0016853,isomerase activity|GO:0003824,catalytic activity|GO:0005488,binding|GO:0005515,protein binding|GO:0016872,intramolecular lyase activity	hsa00562,Inositol phosphate metabolism|hsa01100,Metabolic pathways			http://www.uniprot.org/uniprot/Q9NPH2	False
O94819	16.6102	4.054	O94819	KBTBD11	GO:0071704,organic substance metabolic process|GO:0044267,cellular protein metabolic process|GO:0044238,primary metabolic process|GO:1901564,organonitrogen compound metabolic process|GO:0044260,cellular macromolecule metabolic process|GO:0032446,protein modification by small protein conjugation|GO:0019538,protein metabolic process|GO:0009987,cellular process|GO:0070647,protein modification by sma…	GO:0043234,protein complex|GO:0032991,macromolecular complex|GO:1902494,catalytic complex|GO:0044464,cell part|GO:0000151,ubiquitin ligase complex|GO:0005623,cell|GO:0005622,intracellular|GO:1990234,transferase complex|GO:0044424,intracellular part|GO:0031461,cullin-RING ubiquitin ligase complex|GO:0031463,Cul3-RING ubiquitin ligase complex	GO:0019787,ubiquitin-like protein transferase activity|GO:0003824,catalytic activity|GO:0016740,transferase activity|GO:0004842,ubiquitin-protein transferase activity				http://www.uniprot.org/uniprot/O94819	False
P54652	16.1336	4.012	P54652	HSPA2	GO:0090084,negative regulation of inclusion body assembly|GO:0019220,regulation of phosphate metabolic process|GO:0080090,regulation of primary metabolic process|GO:0019222,regulation of metabolic process|GO:0000086,G2/M transition of mitotic cell cycle|GO:0051049,regulation of transport|GO:1901894,regulation of calcium-transporting ATPase activity|GO:1901896,positive regulation of calcium-transp…	GO:0044421,extracellular region part|GO:0005886,plasma membrane|GO:0031974,membrane-enclosed lumen|GO:0043229,intracellular organelle|GO:0043228,non-membrane-bounded organelle|GO:0034702,ion channel complex|GO:0034703,cation channel complex|GO:0000228,nuclear chromosome|GO:0043227,membrane-bounded organelle|GO:0043226,organelle|GO:0031224,intrinsic component of membrane|GO:0005737,cytoplasm|GO:00…	GO:0035639,purine ribonucleoside triphosphate binding|GO:0019899,enzyme binding|GO:0005488,binding|GO:0043167,ion binding|GO:1901363,heterocyclic compound binding|GO:1901265,nucleoside phosphate binding|GO:0001882,nucleoside binding|GO:0043168,anion binding|GO:0051082,unfolded protein binding|GO:0000166,nucleotide binding|GO:0001883,purine nucleoside binding|GO:0032549,ribonucleoside binding|GO:0…	hsa05134,Legionellosis|hsa03040,Spliceosome|hsa04612,Antigen processing and presentation|hsa04915,Estrogen signaling pathway|hsa04141,Protein processing in endoplasmic reticulum|hsa04144,Endocytosis|hsa04010,MAPK signaling pathway|hsa04213,Longevity regulating pathway - multiple species|hsa05145,Toxoplasmosis|hsa05162,Measles			http://www.uniprot.org/uniprot/P54652	False
Q14894	16.0667	4.006	Q14894	CRYM	GO:0080090,regulation of primary metabolic process|GO:0019222,regulation of metabolic process|GO:1901362,organic cyclic compound biosynthetic process|GO:1901360,organic cyclic compound metabolic process|GO:0042445,hormone metabolic process|GO:0044710,single-organism metabolic process|GO:0010605,negative regulation of macromolecule metabolic process|GO:0048519,negative regulation of biological pro…	GO:0043231,intracellular membrane-bounded organelle|GO:0005737,cytoplasm|GO:0005622,intracellular|GO:0043230,extracellular organelle|GO:0031982,vesicle|GO:0044421,extracellular region part|GO:0043227,membrane-bounded organelle|GO:0005634,nucleus|GO:0044464,cell part|GO:0044444,cytoplasmic part|GO:0005739,mitochondrion|GO:0031988,membrane-bounded vesicle|GO:0043229,intracellular organelle|GO:00055…	GO:0047127,thiomorpholine-carboxylate dehydrogenase activity|GO:0005488,binding|GO:1901363,heterocyclic compound binding|GO:1901265,nucleoside phosphate binding|GO:0016491,oxidoreductase activity|GO:0050662,coenzyme binding|GO:0050661,NADP binding|GO:0003714,transcription corepressor activity|GO:0016646,oxidoreductase activity, acting on the CH-NH group of donors, NAD or NADP as acceptor|GO:00166…				http://www.uniprot.org/uniprot/Q14894	False
O75347	15.5949	3.963	O75347	TBCA	GO:0022607,cellular component assembly|GO:0006457,protein folding|GO:0070271,protein complex biogenesis|GO:0043933,macromolecular complex subunit organization|GO:0006458,'de novo' protein folding|GO:0034622,cellular macromolecular complex assembly|GO:0071840,cellular component organization or biogenesis|GO:0007021,tubulin complex assembly|GO:0044267,cellular protein metabolic process|GO:0007023,p…	GO:0031974,membrane-enclosed lumen|GO:0043229,intracellular organelle|GO:0043228,non-membrane-bounded organelle|GO:0005874,microtubule|GO:0043226,organelle|GO:0005856,cytoskeleton|GO:0070062,extracellular exosome|GO:0031981,nuclear lumen|GO:0005730,nucleolus|GO:0043227,membrane-bounded organelle|GO:0005634,nucleus|GO:0031988,membrane-bounded vesicle|GO:0044430,cytoskeletal part|GO:0005737,cytopla…	GO:0015631,tubulin binding|GO:0005515,protein binding|GO:0008092,cytoskeletal protein binding|GO:0097159,organic cyclic compound binding|GO:0044822,poly(A) RNA binding|GO:0051087,chaperone binding|GO:0051082,unfolded protein binding|GO:0003723,RNA binding|GO:0003676,nucleic acid binding|GO:1901363,heterocyclic compound binding|GO:0005488,binding|GO:0048487,beta-tubulin binding				http://www.uniprot.org/uniprot/O75347	False
O00442	15.0846	3.915	O00442	RTCA	GO:0016070,RNA metabolic process|GO:0006139,nucleobase-containing compound metabolic process|GO:0044260,cellular macromolecule metabolic process|GO:0044238,primary metabolic process|GO:0009987,cellular process|GO:0006725,cellular aromatic compound metabolic process|GO:0010467,gene expression|GO:0044237,cellular metabolic process|GO:0043170,macromolecule metabolic process|GO:0090304,nucleic acid m…	GO:0044446,intracellular organelle part|GO:0043231,intracellular membrane-bounded organelle|GO:0031981,nuclear lumen|GO:0043233,organelle lumen|GO:0005634,nucleus|GO:0044464,cell part|GO:0031974,membrane-enclosed lumen|GO:0005622,intracellular|GO:0005654,nucleoplasm|GO:0070013,intracellular organelle lumen|GO:0043229,intracellular organelle|GO:0044428,nuclear part|GO:0005623,cell|GO:0044424,intra…	GO:0035639,purine ribonucleoside triphosphate binding|GO:0005488,binding|GO:0003676,nucleic acid binding|GO:0016886,ligase activity, forming phosphoric ester bonds|GO:0043167,ion binding|GO:1901363,heterocyclic compound binding|GO:1901265,nucleoside phosphate binding|GO:0001882,nucleoside binding|GO:0043168,anion binding|GO:0000166,nucleotide binding|GO:0001883,purine nucleoside binding|GO:003254…				http://www.uniprot.org/uniprot/O00442	False
P08473	15.0741	3.914	P08473	MME	GO:0044238,primary metabolic process|GO:0080090,regulation of primary metabolic process|GO:0019222,regulation of metabolic process|GO:0003013,circulatory system process|GO:0044281,small molecule metabolic process|GO:1901360,organic cyclic compound metabolic process|GO:0042445,hormone metabolic process|GO:0051716,cellular response to stimulus|GO:0001822,kidney development|GO:0048513,animal organ d…	GO:0008021,synaptic vesicle|GO:0042995,cell projection|GO:0030425,dendrite|GO:0030424,axon|GO:0043229,intracellular organelle|GO:0005903,brush border|GO:0045202,synapse|GO:0005924,cell-substrate adherens junction|GO:0005925,focal adhesion|GO:0043227,membrane-bounded organelle|GO:0043226,organelle|GO:0030054,cell junction|GO:0030055,cell-substrate junction|GO:0005737,cytoplasm|GO:0044306,neuron pr…	GO:0016787,hydrolase activity|GO:0004175,endopeptidase activity|GO:0004222,metalloendopeptidase activity|GO:0046914,transition metal ion binding|GO:0003824,catalytic activity|GO:0033218,amide binding|GO:0043169,cation binding|GO:0043167,ion binding|GO:0008238,exopeptidase activity|GO:0070011,peptidase activity, acting on L-amino acid peptides|GO:0008270,zinc ion binding|GO:0005515,protein binding…	hsa04614,Renin-angiotensin system|hsa04974,Protein digestion and absorption|hsa05010,Alzheimer disease|hsa04640,Hematopoietic cell lineage	H00001,Acute lymphoblastic leukemia (ALL) (precursor B lymphoblastic leukemia)|H00002,Acute lymphoblastic leukemia (ALL) (precursor T lymphoblastic leukemia)	D01070,Candoxatril (JAN/USAN/INN)|D03349,Candoxatrilat (USAN/INN)|D03929,Ecadotril (USAN/INN)|D08464,Racecadotril (INN); Tiorfan (TN); Hidrasec (TN)|D10225,Sacubitril (JAN/USAN/INN)	http://www.uniprot.org/uniprot/P08473	False
A0A4Z1	14.7844	3.886	A0A4Z1	CADM1		GO:0044425,membrane part|GO:0016021,integral component of membrane|GO:0016020,membrane|GO:0031224,intrinsic component of membrane					http://www.uniprot.org/uniprot/A0A4Z1	False
Q9Y617	14.43	3.851	Q9Y617	PSAT1	GO:0019752,carboxylic acid metabolic process|GO:0042364,water-soluble vitamin biosynthetic process|GO:0044249,cellular biosynthetic process|GO:0034641,cellular nitrogen compound metabolic process|GO:0006807,nitrogen compound metabolic process|GO:0044281,small molecule metabolic process|GO:0044283,small molecule biosynthetic process|GO:0009069,serine family amino acid metabolic process|GO:0072524,…	GO:0005737,cytoplasm|GO:0005622,intracellular|GO:0043230,extracellular organelle|GO:0031982,vesicle|GO:0044421,extracellular region part|GO:0043227,membrane-bounded organelle|GO:0005829,cytosol|GO:0044464,cell part|GO:0005623,cell|GO:0031988,membrane-bounded vesicle|GO:0044444,cytoplasmic part|GO:0005576,extracellular region|GO:0044424,intracellular part|GO:1903561,extracellular vesicle|GO:006501…	GO:0004648,O-phospho-L-serine:2-oxoglutarate aminotransferase activity|GO:0003824,catalytic activity|GO:0008483,transaminase activity|GO:0016740,transferase activity|GO:0016769,transferase activity, transferring nitrogenous groups	hsa01200,Carbon metabolism|hsa00750,Vitamin B6 metabolism|hsa01100,Metabolic pathways|hsa01230,Biosynthesis of amino acids|hsa00260,Glycine, serine and threonine metabolism|hsa00270,Cysteine and methionine metabolism			http://www.uniprot.org/uniprot/Q9Y617	False
P19022	13.0774	3.709	P19022	CDH2	GO:0043933,macromolecular complex subunit organization|GO:0019220,regulation of phosphate metabolic process|GO:0080090,regulation of primary metabolic process|GO:0019222,regulation of metabolic process|GO:0048585,negative regulation of response to stimulus|GO:0048584,positive regulation of response to stimulus|GO:0048583,regulation of response to stimulus|GO:0061024,membrane organization|GO:00301…	GO:0019897,extrinsic component of plasma membrane|GO:0098590,plasma membrane region|GO:0015629,actin cytoskeleton|GO:0044421,extracellular region part|GO:0019898,extrinsic component of membrane|GO:0014704,intercalated disc|GO:0043229,intracellular organelle|GO:0043228,non-membrane-bounded organelle|GO:0045202,synapse|GO:0005924,cell-substrate adherens junction|GO:0005925,focal adhesion|GO:0043227…	GO:0043169,cation binding|GO:0019899,enzyme binding|GO:0050998,nitric-oxide synthase binding|GO:0045294,alpha-catenin binding|GO:0045295,gamma-catenin binding|GO:0008013,beta-catenin binding|GO:0043167,ion binding|GO:0019901,protein kinase binding|GO:0019900,kinase binding|GO:0019903,protein phosphatase binding|GO:0019902,phosphatase binding|GO:0044877,macromolecular complex binding|GO:0005509,ca…	hsa04514,Cell adhesion molecules|hsa05412,Arrhythmogenic right ventricular cardiomyopathy			http://www.uniprot.org/uniprot/P19022	False
A3R0T8	12.8349	3.682	A3R0T8	HIST1H1E	GO:0006479,protein methylation|GO:0080090,regulation of primary metabolic process|GO:0019222,regulation of metabolic process|GO:0051568,histone H3-K4 methylation|GO:1901362,organic cyclic compound biosynthetic process|GO:0071840,cellular component organization or biogenesis|GO:0010605,negative regulation of macromolecule metabolic process|GO:0018193,peptidyl-amino acid modification|GO:0016571,his…	GO:0031974,membrane-enclosed lumen|GO:0044815,DNA packaging complex|GO:0043229,intracellular organelle|GO:0043228,non-membrane-bounded organelle|GO:0000785,chromatin|GO:0000786,nucleosome|GO:0000788,nuclear nucleosome|GO:0000228,nuclear chromosome|GO:0043227,membrane-bounded organelle|GO:0043226,organelle|GO:0031981,nuclear lumen|GO:0005634,nucleus|GO:0044454,nuclear chromosome part|GO:0005694,ch…	GO:0035639,purine ribonucleoside triphosphate binding|GO:0005488,binding|GO:0003676,nucleic acid binding|GO:0003677,DNA binding|GO:0043167,ion binding|GO:1901363,heterocyclic compound binding|GO:1901265,nucleoside phosphate binding|GO:0001882,nucleoside binding|GO:0043168,anion binding|GO:0043169,cation binding|GO:0000166,nucleotide binding|GO:0032561,guanyl ribonucleotide binding|GO:0032564,dATP…				http://www.uniprot.org/uniprot/A3R0T8	False
Q14240	12.3121	3.622	Q14240	EIF4A2	GO:0019221,cytokine-mediated signaling pathway|GO:0019222,regulation of metabolic process|GO:0007165,signal transduction|GO:0007166,cell surface receptor signaling pathway|GO:1901362,organic cyclic compound biosynthetic process|GO:1901360,organic cyclic compound metabolic process|GO:0080090,regulation of primary metabolic process|GO:1900260,negative regulation of RNA-directed RNA polymerase activ…	GO:0043234,protein complex|GO:0005737,cytoplasm|GO:0032991,macromolecular complex|GO:0016281,eukaryotic translation initiation factor 4F complex|GO:0044464,cell part|GO:0005623,cell|GO:0005622,intracellular|GO:0044444,cytoplasmic part|GO:0044424,intracellular part|GO:0048471,perinuclear region of cytoplasm|GO:0005829,cytosol|GO:0031974,membrane-enclosed lumen|GO:0043229,intracellular organelle|GO…	GO:0016887,ATPase activity|GO:0008026,ATP-dependent helicase activity|GO:0035639,purine ribonucleoside triphosphate binding|GO:0005488,binding|GO:0003676,nucleic acid binding|GO:0008186,RNA-dependent ATPase activity|GO:0043167,ion binding|GO:1901363,heterocyclic compound binding|GO:0001883,purine nucleoside binding|GO:0001882,nucleoside binding|GO:0043168,anion binding|GO:0042623,ATPase activity,…	hsa03013,RNA transport			http://www.uniprot.org/uniprot/Q14240	False
Q8WXF1	12.0838	3.595	Q8WXF1	PSPC1	GO:0009892,negative regulation of metabolic process|GO:0080090,regulation of primary metabolic process|GO:0009890,negative regulation of biosynthetic process|GO:0031327,negative regulation of cellular biosynthetic process|GO:0031326,regulation of cellular biosynthetic process|GO:0031324,negative regulation of cellular metabolic process|GO:0031323,regulation of cellular metabolic process|GO:009030…	GO:0031974,membrane-enclosed lumen|GO:0043229,intracellular organelle|GO:0043228,non-membrane-bounded organelle|GO:0005622,intracellular|GO:0043227,membrane-bounded organelle|GO:0043226,organelle|GO:0034399,nuclear periphery|GO:0016604,nuclear body|GO:0031981,nuclear lumen|GO:0005730,nucleolus|GO:0005634,nucleus|GO:0005654,nucleoplasm|GO:0044451,nucleoplasm part|GO:0016363,nuclear matrix|GO:00166…	GO:0044212,transcription regulatory region DNA binding|GO:0003676,nucleic acid binding|GO:0005515,protein binding|GO:0097159,organic cyclic compound binding|GO:0044822,poly(A) RNA binding|GO:0003677,DNA binding|GO:0001067,regulatory region nucleic acid binding|GO:0000166,nucleotide binding|GO:0036094,small molecule binding|GO:0003723,RNA binding|GO:0001047,core promoter binding|GO:0000975,regulat…				http://www.uniprot.org/uniprot/Q8WXF1	False
P56159	10.8754	3.443	P56159	GFRA1	GO:0032502,developmental process|GO:0044707,single-multicellular organism process|GO:0007169,transmembrane receptor protein tyrosine kinase signaling pathway|GO:0030030,cell projection organization|GO:0007167,enzyme linked receptor protein signaling pathway|GO:0048468,cell development|GO:0006928,movement of cell or subcellular component|GO:0032501,multicellular organismal process|GO:0023052,signa…	GO:0019898,extrinsic component of membrane|GO:0043230,extracellular organelle|GO:0031982,vesicle|GO:0044421,extracellular region part|GO:0043227,membrane-bounded organelle|GO:0016020,membrane|GO:0044464,cell part|GO:0005623,cell|GO:0031988,membrane-bounded vesicle|GO:0031225,anchored component of membrane|GO:0071944,cell periphery|GO:0005576,extracellular region|GO:0005886,plasma membrane|GO:0044…	GO:0005488,binding|GO:0038023,signaling receptor activity|GO:0005515,protein binding|GO:0016167,glial cell-derived neurotrophic factor receptor activity|GO:0060089,molecular transducer activity|GO:0004888,transmembrane signaling receptor activity|GO:0004872,receptor activity|GO:0004871,signal transducer activity|GO:0005102,receptor binding|GO:0004896,cytokine receptor activity|GO:0005088,Ras guan…				http://www.uniprot.org/uniprot/P56159	False
P63281	10.748	3.426	P63281	P63281							http://www.uniprot.org/uniprot/P63281	False
Q1KMD3	10.5414	3.398	Q1KMD3	HNRNPUL2		GO:0043231,intracellular membrane-bounded organelle|GO:0005634,nucleus|GO:0016020,membrane|GO:0044464,cell part|GO:0005623,cell|GO:0005622,intracellular|GO:0043229,intracellular organelle|GO:0044424,intracellular part|GO:0043227,membrane-bounded organelle|GO:0043226,organelle|GO:0044446,intracellular organelle part|GO:0031981,nuclear lumen|GO:0043233,organelle lumen|GO:0031974,membrane-enclosed l…	GO:0097159,organic cyclic compound binding|GO:0044822,poly(A) RNA binding|GO:0005488,binding|GO:0003676,nucleic acid binding|GO:1901363,heterocyclic compound binding|GO:0003723,RNA binding				http://www.uniprot.org/uniprot/Q1KMD3	False
O14579	10.1471	3.343	O14579	COPE	GO:0008104,protein localization|GO:0048200,Golgi transport vesicle coating|GO:0006901,vesicle coating|GO:0048205,COPI coating of Golgi vesicle|GO:0006903,vesicle targeting|GO:0061024,membrane organization|GO:0051641,cellular localization|GO:0051640,organelle localization|GO:0051656,establishment of organelle localization|GO:0051650,establishment of vesicle localization|GO:0044699,single-organism …	GO:0043231,intracellular membrane-bounded organelle|GO:0098796,membrane protein complex|GO:0031974,membrane-enclosed lumen|GO:0043229,intracellular organelle|GO:0030117,membrane coat|GO:0005622,intracellular|GO:0030135,coated vesicle|GO:0043226,organelle|GO:0030137,COPI-coated vesicle|GO:0005737,cytoplasm|GO:0005654,nucleoplasm|GO:0031982,vesicle|GO:0030663,COPI-coated vesicle membrane|GO:0030662…	GO:0005488,binding|GO:0005515,protein binding|GO:0005198,structural molecule activity				http://www.uniprot.org/uniprot/O14579	False
B7Z4W0	10.112	3.338	B7Z4W0	B7Z4W0	GO:0080090,regulation of primary metabolic process|GO:0019222,regulation of metabolic process|GO:0031326,regulation of cellular biosynthetic process|GO:0031323,regulation of cellular metabolic process|GO:0090304,nucleic acid metabolic process|GO:0044249,cellular biosynthetic process|GO:0034641,cellular nitrogen compound metabolic process|GO:0006807,nitrogen compound metabolic process|GO:0034645,c…	GO:0043231,intracellular membrane-bounded organelle|GO:0005634,nucleus|GO:0044464,cell part|GO:0005623,cell|GO:0005622,intracellular|GO:0043229,intracellular organelle|GO:0044424,intracellular part|GO:0043227,membrane-bounded organelle|GO:0043226,organelle	GO:0005488,binding|GO:0043169,cation binding|GO:0046914,transition metal ion binding|GO:0097159,organic cyclic compound binding|GO:0008135,translation factor activity, RNA binding|GO:0043167,ion binding|GO:0008270,zinc ion binding|GO:0003676,nucleic acid binding|GO:0003746,translation elongation factor activity|GO:0046872,metal ion binding|GO:1901363,heterocyclic compound binding|GO:0003723,RNA b…				http://www.uniprot.org/uniprot/B7Z4W0	False
Q92841	9.50706	3.249	Q92841	DDX17	GO:0080090,regulation of primary metabolic process|GO:0019222,regulation of metabolic process|GO:0048584,positive regulation of response to stimulus|GO:0048583,regulation of response to stimulus|GO:0007165,signal transduction|GO:1901362,organic cyclic compound biosynthetic process|GO:1901360,organic cyclic compound metabolic process|GO:0007517,muscle organ development|GO:0010604,positive regulati…	GO:0031974,membrane-enclosed lumen|GO:0043229,intracellular organelle|GO:0043228,non-membrane-bounded organelle|GO:0043227,membrane-bounded organelle|GO:0043226,organelle|GO:0031981,nuclear lumen|GO:0005730,nucleolus|GO:0005634,nucleus|GO:0016020,membrane|GO:0005654,nucleoplasm|GO:0043231,intracellular membrane-bounded organelle|GO:0043232,intracellular non-membrane-bounded organelle|GO:0043233,o…	GO:0016887,ATPase activity|GO:0008026,ATP-dependent helicase activity|GO:0035639,purine ribonucleoside triphosphate binding|GO:0005488,binding|GO:0003676,nucleic acid binding|GO:0008186,RNA-dependent ATPase activity|GO:0043167,ion binding|GO:1901363,heterocyclic compound binding|GO:0001883,purine nucleoside binding|GO:0001882,nucleoside binding|GO:0043168,anion binding|GO:0042623,ATPase activity,…				http://www.uniprot.org/uniprot/Q92841	False
V9HWA2	9.36968	3.228	V9HWA2	HEL-S-166MP		GO:0005737,cytoplasm|GO:0005829,cytosol|GO:0044464,cell part|GO:0005623,cell|GO:0005622,intracellular|GO:0044444,cytoplasmic part|GO:0044424,intracellular part					http://www.uniprot.org/uniprot/V9HWA2	False
Q8N684	9.06307	3.18	Q8N684	CPSF7	GO:0022607,cellular component assembly|GO:0032774,RNA biosynthetic process|GO:0070271,protein complex biogenesis|GO:0043933,macromolecular complex subunit organization|GO:0044237,cellular metabolic process|GO:0090304,nucleic acid metabolic process|GO:0044249,cellular biosynthetic process|GO:0034641,cellular nitrogen compound metabolic process|GO:0006807,nitrogen compound metabolic process|GO:0016…	GO:0005849,mRNA cleavage factor complex|GO:0031974,membrane-enclosed lumen|GO:0043229,intracellular organelle|GO:0043227,membrane-bounded organelle|GO:0043226,organelle|GO:0031981,nuclear lumen|GO:0005634,nucleus|GO:0016020,membrane|GO:0005654,nucleoplasm|GO:0044451,nucleoplasm part|GO:0043234,protein complex|GO:0032991,macromolecular complex|GO:0043231,intracellular membrane-bounded organelle|GO…	GO:0005515,protein binding|GO:0097159,organic cyclic compound binding|GO:0044822,poly(A) RNA binding|GO:0000166,nucleotide binding|GO:0036094,small molecule binding|GO:0003723,RNA binding|GO:0003676,nucleic acid binding|GO:1901363,heterocyclic compound binding|GO:1901265,nucleoside phosphate binding|GO:0005488,binding	hsa03015,mRNA surveillance pathway			http://www.uniprot.org/uniprot/Q8N684	False
Q12824	8.97555	3.166	Q12824	SMARCB1	GO:0043044,ATP-dependent chromatin remodeling|GO:0080090,regulation of primary metabolic process|GO:0019222,regulation of metabolic process|GO:1901362,organic cyclic compound biosynthetic process|GO:0071840,cellular component organization or biogenesis|GO:0071684,organism emergence from protective structure|GO:0044710,single-organism metabolic process|GO:0010604,positive regulation of macromolecu…	GO:0097458,neuron part|GO:0031974,membrane-enclosed lumen|GO:0043229,intracellular organelle|GO:0043228,non-membrane-bounded organelle|GO:0000785,chromatin|GO:0000228,nuclear chromosome|GO:0043227,membrane-bounded organelle|GO:0043226,organelle|GO:0001741,XY body|GO:0070603,SWI/SNF superfamily-type complex|GO:0031981,nuclear lumen|GO:0005730,nucleolus|GO:0005634,nucleus|GO:0000803,sex chromosome|…	GO:0001012,RNA polymerase II regulatory region DNA binding|GO:0001159,core promoter proximal region DNA binding|GO:0001158,enhancer sequence-specific DNA binding|GO:0031491,nucleosome binding|GO:0031490,chromatin DNA binding|GO:0031492,nucleosomal DNA binding|GO:0044877,macromolecular complex binding|GO:0005488,binding|GO:0003676,nucleic acid binding|GO:0003677,DNA binding|GO:1901363,heterocyclic…	hsa05225,Hepatocellular carcinoma|hsa04714,Thermogenesis			http://www.uniprot.org/uniprot/Q12824	False
P50416	8.80303	3.138	P50416	CPT1A	GO:0090087,regulation of peptide transport|GO:0034440,lipid oxidation|GO:0044238,primary metabolic process|GO:0015879,carnitine transport|GO:0080090,regulation of primary metabolic process|GO:0019222,regulation of metabolic process|GO:0051049,regulation of transport|GO:0007610,behavior|GO:0006839,mitochondrial transport|GO:0006820,anion transport|GO:0008104,protein localization|GO:0044281,small m…	GO:0044464,cell part|GO:0098573,intrinsic component of mitochondrial membrane|GO:0019867,outer membrane|GO:0043229,intracellular organelle|GO:0031306,intrinsic component of mitochondrial outer membrane|GO:0031301,integral component of organelle membrane|GO:0031300,intrinsic component of organelle membrane|GO:0032592,integral component of mitochondrial membrane|GO:0043227,membrane-bounded organell…	GO:0016416,O-palmitoyltransferase activity|GO:0003824,catalytic activity|GO:0016740,transferase activity|GO:0016406,carnitine O-acyltransferase activity|GO:0004095,carnitine O-palmitoyltransferase activity|GO:0016747,transferase activity, transferring acyl groups other than amino-acyl groups|GO:0005515,protein binding|GO:0008374,O-acyltransferase activity|GO:0016746,transferase activity, transfer…	hsa01212,Fatty acid metabolism|hsa03320,PPAR signaling pathway|hsa00071,Fatty acid degradation|hsa04931,Insulin resistance|hsa04714,Thermogenesis|hsa04152,AMPK signaling pathway|hsa04922,Glucagon signaling pathway|hsa04920,Adipocytokine signaling pathway		D05292,Oxfenicine (USAN/INN)|D05442,Perhexiline maleate (USAN)|D08340,Perhexiline (INN)	http://www.uniprot.org/uniprot/P50416	False
P39687	8.47962	3.084	P39687	ANP32A	GO:0051169,nuclear transport|GO:0080090,regulation of primary metabolic process|GO:0019222,regulation of metabolic process|GO:0031326,regulation of cellular biosynthetic process|GO:0051649,establishment of localization in cell|GO:0031323,regulation of cellular metabolic process|GO:0090304,nucleic acid metabolic process|GO:0044249,cellular biosynthetic process|GO:0034641,cellular nitrogen compound…	GO:0005783,endoplasmic reticulum|GO:0031974,membrane-enclosed lumen|GO:0043229,intracellular organelle|GO:0043227,membrane-bounded organelle|GO:0043226,organelle|GO:0005737,cytoplasm|GO:0031981,nuclear lumen|GO:0005634,nucleus|GO:0005654,nucleoplasm|GO:0048471,perinuclear region of cytoplasm|GO:0012505,endomembrane system|GO:0043231,intracellular membrane-bounded organelle|GO:0043233,organelle lu…	GO:0003676,nucleic acid binding|GO:0097159,organic cyclic compound binding|GO:0044822,poly(A) RNA binding|GO:0003723,RNA binding|GO:0005515,protein binding|GO:1901363,heterocyclic compound binding|GO:0005488,binding|GO:0042393,histone binding				http://www.uniprot.org/uniprot/P39687	False
P09651	8.38029	3.067	P09651	HNRNPA1	GO:0015931,nucleobase-containing compound transport|GO:0051169,nuclear transport|GO:0051168,nuclear export|GO:0090304,nucleic acid metabolic process|GO:0034641,cellular nitrogen compound metabolic process|GO:0006807,nitrogen compound metabolic process|GO:0044237,cellular metabolic process|GO:0051641,cellular localization|GO:0044419,interspecies interaction between organisms|GO:0051028,mRNA transp…	GO:0031974,membrane-enclosed lumen|GO:0043229,intracellular organelle|GO:0043228,non-membrane-bounded organelle|GO:0030529,intracellular ribonucleoprotein complex|GO:0043227,membrane-bounded organelle|GO:0043226,organelle|GO:0005856,cytoskeleton|GO:0045111,intermediate filament cytoskeleton|GO:0070062,extracellular exosome|GO:0031981,nuclear lumen|GO:0005634,nucleus|GO:0016020,membrane|GO:0031988…	GO:0043566,structure-specific DNA binding|GO:0005515,protein binding|GO:0097159,organic cyclic compound binding|GO:0044822,poly(A) RNA binding|GO:1901363,heterocyclic compound binding|GO:0000166,nucleotide binding|GO:0036094,small molecule binding|GO:0003727,single-stranded RNA binding|GO:0003723,RNA binding|GO:0003676,nucleic acid binding|GO:0003677,DNA binding|GO:0003697,single-stranded DNA bin…	hsa03040,Spliceosome			http://www.uniprot.org/uniprot/P09651	False
Q9UIG0	8.33395	3.059	Q9UIG0	BAZ1B	GO:0080090,regulation of primary metabolic process|GO:0019222,regulation of metabolic process|GO:0048583,regulation of response to stimulus|GO:0072359,circulatory system development|GO:0072358,cardiovascular system development|GO:0007165,signal transduction|GO:1901362,organic cyclic compound biosynthetic process|GO:0071840,cellular component organization or biogenesis|GO:0044710,single-organism m…	GO:0031974,membrane-enclosed lumen|GO:0043229,intracellular organelle|GO:0043228,non-membrane-bounded organelle|GO:0000785,chromatin|GO:0000228,nuclear chromosome|GO:0043227,membrane-bounded organelle|GO:0043226,organelle|GO:0031981,nuclear lumen|GO:0005634,nucleus|GO:0044454,nuclear chromosome part|GO:0005657,replication fork|GO:0005694,chromosome|GO:0000792,heterochromatin|GO:0000793,condensed …	GO:0005488,binding|GO:0042393,histone binding|GO:0035639,purine ribonucleoside triphosphate binding|GO:0044877,macromolecular complex binding|GO:0004672,protein kinase activity|GO:0098772,molecular function regulator|GO:1901363,heterocyclic compound binding|GO:0001883,purine nucleoside binding|GO:0001882,nucleoside binding|GO:0043168,anion binding|GO:0043169,cation binding|GO:0046914,transition m…				http://www.uniprot.org/uniprot/Q9UIG0	False
Q00534	8.12856	3.023	Q00534	CDK6	GO:0019222,regulation of metabolic process|GO:0048585,negative regulation of response to stimulus|GO:0048583,regulation of response to stimulus|GO:0050680,negative regulation of epithelial cell proliferation|GO:0032844,regulation of homeostatic process|GO:0007160,cell-matrix adhesion|GO:0060322,head development|GO:0007165,signal transduction|GO:0007166,cell surface receptor signaling pathway|GO:0…	GO:0000307,cyclin-dependent protein kinase holoenzyme complex|GO:0031974,membrane-enclosed lumen|GO:0043229,intracellular organelle|GO:0043228,non-membrane-bounded organelle|GO:0043227,membrane-bounded organelle|GO:0043226,organelle|GO:0005856,cytoskeleton|GO:0001726,ruffle|GO:0031981,nuclear lumen|GO:0005813,centrosome|GO:0005634,nucleus|GO:0005815,microtubule organizing center|GO:0005654,nucleo…	GO:0035639,purine ribonucleoside triphosphate binding|GO:0004672,protein kinase activity|GO:0004693,cyclin-dependent protein serine/threonine kinase activity|GO:0043167,ion binding|GO:1901363,heterocyclic compound binding|GO:0001883,purine nucleoside binding|GO:0001882,nucleoside binding|GO:0043168,anion binding|GO:0004674,protein serine/threonine kinase activity|GO:0000166,nucleotide binding|GO:…	hsa05218,Melanoma|hsa05212,Pancreatic cancer|hsa05214,Glioma|hsa04218,Cellular senescence|hsa05169,Epstein-Barr virus infection|hsa05164,Influenza A|hsa05165,Human papillomavirus infection|hsa05167,Kaposi sarcoma-associated herpesvirus infection|hsa05160,Hepatitis C|hsa05162,Measles|hsa05163,Human cytomegalovirus infection|hsa04110,Cell cycle|hsa05206,MicroRNAs in cancer|hsa05200,Pathways in canc…		D10372,Palbociclib (JAN/USAN); Ibrance (TN)|D10652,Palbociclib isethionate (USAN)|D10688,Abemaciclib (USAN)	http://www.uniprot.org/uniprot/Q00534	False
Q9UHL4	8.01665	3.003	Q9UHL4	DPP7	GO:0044238,primary metabolic process|GO:0019538,protein metabolic process|GO:0043170,macromolecule metabolic process|GO:0071704,organic substance metabolic process|GO:0008152,metabolic process|GO:0006508,proteolysis|GO:0006887,exocytosis|GO:0042119,neutrophil activation|GO:0001775,cell activation|GO:0045321,leukocyte activation|GO:0032940,secretion by cell|GO:0006807,nitrogen compound metabolic p…	GO:0000323,lytic vacuole|GO:0043229,intracellular organelle|GO:0043227,membrane-bounded organelle|GO:0043226,organelle|GO:0005737,cytoplasm|GO:0070062,extracellular exosome|GO:0016023,cytoplasmic, membrane-bounded vesicle|GO:0031410,cytoplasmic vesicle|GO:0031988,membrane-bounded vesicle|GO:0005794,Golgi apparatus|GO:0012505,endomembrane system|GO:1903561,extracellular vesicle|GO:0031982,vesicle|…	GO:0004177,aminopeptidase activity|GO:0017171,serine hydrolase activity|GO:0016787,hydrolase activity|GO:0003824,catalytic activity|GO:0008239,dipeptidyl-peptidase activity|GO:0008238,exopeptidase activity|GO:0070011,peptidase activity, acting on L-amino acid peptides|GO:0008233,peptidase activity|GO:0008236,serine-type peptidase activity|GO:0140096,catalytic activity, acting on a protein				http://www.uniprot.org/uniprot/Q9UHL4	False
A0A024RAC5	7.90081	2.982	A0A024RAC5	RCC2	GO:0008104,protein localization|GO:0034446,substrate adhesion-dependent cell spreading|GO:0048468,cell development|GO:0007160,cell-matrix adhesion|GO:0060491,regulation of cell projection assembly|GO:0051893,regulation of focal adhesion assembly|GO:0031344,regulation of cell projection organization|GO:0051895,negative regulation of focal adhesion assembly|GO:0048869,cellular developmental process…	GO:0043229,intracellular organelle|GO:0071944,cell periphery|GO:0005622,intracellular|GO:0043227,membrane-bounded organelle|GO:0043226,organelle|GO:0010008,endosome membrane|GO:0005737,cytoplasm|GO:0031982,vesicle|GO:0031410,cytoplasmic vesicle|GO:0005634,nucleus|GO:0016020,membrane|GO:0044433,cytoplasmic vesicle part|GO:0031901,early endosome membrane|GO:0098588,bounding membrane of organelle|GO…	GO:0051020,GTPase binding|GO:0019899,enzyme binding|GO:0017016,Ras GTPase binding|GO:0031267,small GTPase binding|GO:0048365,Rac GTPase binding|GO:0017048,Rho GTPase binding|GO:0005515,protein binding|GO:0005488,binding				http://www.uniprot.org/uniprot/A0A024RAC5	False
Q16352	7.76508	2.957	Q16352	INA	GO:0030154,cell differentiation|GO:0060322,head development|GO:0021762,substantia nigra development|GO:0007275,multicellular organism development|GO:0044699,single-organism process|GO:0007417,central nervous system development|GO:0048869,cellular developmental process|GO:0016043,cellular component organization|GO:0048513,animal organ development|GO:0071840,cellular component organization or bioge…	GO:0016020,membrane|GO:0035770,ribonucleoprotein granule|GO:0031974,membrane-enclosed lumen|GO:0031975,envelope|GO:0043229,intracellular organelle|GO:0043228,non-membrane-bounded organelle|GO:0036464,cytoplasmic ribonucleoprotein granule|GO:0043227,membrane-bounded organelle|GO:0043226,organelle|GO:0005856,cytoskeleton|GO:0045111,intermediate filament cytoskeleton|GO:0031090,organelle membrane|GO…	GO:0005200,structural constituent of cytoskeleton|GO:0005198,structural molecule activity|GO:0098918,structural constituent of synapse|GO:0098973,structural constituent of postsynaptic actin cytoskeleton|GO:0099184,structural constituent of postsynaptic intermediate filament cytoskeleton				http://www.uniprot.org/uniprot/Q16352	False
P43243	7.63168	2.932	P43243	MATR3	GO:0019222,regulation of metabolic process|GO:0060255,regulation of macromolecule metabolic process|GO:0010608,posttranscriptional regulation of gene expression|GO:0050789,regulation of biological process|GO:0071704,organic substance metabolic process|GO:0010467,gene expression|GO:0065007,biological regulation|GO:0008152,metabolic process|GO:0043170,macromolecule metabolic process|GO:0010468,regu…	GO:0005635,nuclear envelope|GO:0044464,cell part|GO:0031974,membrane-enclosed lumen|GO:0031975,envelope|GO:0043229,intracellular organelle|GO:0043227,membrane-bounded organelle|GO:0043226,organelle|GO:0034399,nuclear periphery|GO:0031090,organelle membrane|GO:0031981,nuclear lumen|GO:0005637,nuclear inner membrane|GO:0005634,nucleus|GO:0016020,membrane|GO:0005654,nucleoplasm|GO:0016363,nuclear ma…	GO:0005488,binding|GO:0043169,cation binding|GO:0046872,metal ion binding|GO:0005515,protein binding|GO:0046914,transition metal ion binding|GO:0097159,organic cyclic compound binding|GO:0044822,poly(A) RNA binding|GO:0000166,nucleotide binding|GO:0036094,small molecule binding|GO:0043167,ion binding|GO:0003723,RNA binding|GO:0003676,nucleic acid binding|GO:0005198,structural molecule activity|GO…				http://www.uniprot.org/uniprot/P43243	False
V9HW74	7.50577	2.908	V9HW74	HEL-117	GO:0048468,cell development|GO:0007610,behavior|GO:0016043,cellular component organization|GO:0051654,establishment of mitochondrion localization|GO:0051656,establishment of organelle localization|GO:0071840,cellular component organization or biogenesis|GO:0048869,cellular developmental process|GO:0070647,protein modification by small protein conjugation or removal|GO:0070646,protein modification…	GO:0031974,membrane-enclosed lumen|GO:0030424,axon|GO:0043229,intracellular organelle|GO:0043227,membrane-bounded organelle|GO:0043226,organelle|GO:0005737,cytoplasm|GO:0044306,neuron projection terminus|GO:0031981,nuclear lumen|GO:0043209,myelin sheath|GO:0005634,nucleus|GO:1904115,axon cytoplasm|GO:0005654,nucleoplasm|GO:0097458,neuron part|GO:0043005,neuron projection|GO:0043025,neuronal cell …	GO:0016787,hydrolase activity|GO:0019783,ubiquitin-like protein-specific protease activity|GO:0101005,ubiquitinyl hydrolase activity|GO:0032182,ubiquitin-like protein binding|GO:0004843,thiol-dependent ubiquitin-specific protease activity|GO:0003824,catalytic activity|GO:0036459,thiol-dependent ubiquitinyl hydrolase activity|GO:0070011,peptidase activity, acting on L-amino acid peptides|GO:000548…				http://www.uniprot.org/uniprot/V9HW74	False
P31942	7.30052	2.868	P31942	HNRNPH3	GO:0030154,cell differentiation|GO:0090304,nucleic acid metabolic process|GO:0034641,cellular nitrogen compound metabolic process|GO:0006807,nitrogen compound metabolic process|GO:0044237,cellular metabolic process|GO:0044699,single-organism process|GO:0006139,nucleobase-containing compound metabolic process|GO:0044260,cellular macromolecule metabolic process|GO:0048869,cellular developmental pro…	GO:0044446,intracellular organelle part|GO:0032991,macromolecular complex|GO:0043231,intracellular membrane-bounded organelle|GO:0031981,nuclear lumen|GO:0043233,organelle lumen|GO:0005634,nucleus|GO:0044464,cell part|GO:0031974,membrane-enclosed lumen|GO:0030529,intracellular ribonucleoprotein complex|GO:0005654,nucleoplasm|GO:0070013,intracellular organelle lumen|GO:0043229,intracellular organe…	GO:0005515,protein binding|GO:0097159,organic cyclic compound binding|GO:0044822,poly(A) RNA binding|GO:0000166,nucleotide binding|GO:0036094,small molecule binding|GO:0003723,RNA binding|GO:0003676,nucleic acid binding|GO:1901363,heterocyclic compound binding|GO:1901265,nucleoside phosphate binding|GO:0005488,binding				http://www.uniprot.org/uniprot/P31942	False
O75475	7.215	2.851	O75475	PSIP1	GO:0080090,regulation of primary metabolic process|GO:0019222,regulation of metabolic process|GO:0000377,RNA splicing, via transesterification reactions with bulged adenosine as nucleophile|GO:1901362,organic cyclic compound biosynthetic process|GO:0071840,cellular component organization or biogenesis|GO:0000245,spliceosomal complex assembly|GO:0010604,positive regulation of macromolecule metabol…	GO:0031974,membrane-enclosed lumen|GO:0043229,intracellular organelle|GO:0043228,non-membrane-bounded organelle|GO:0000785,chromatin|GO:0000228,nuclear chromosome|GO:0043227,membrane-bounded organelle|GO:0043226,organelle|GO:0034399,nuclear periphery|GO:0031981,nuclear lumen|GO:0005730,nucleolus|GO:0005634,nucleus|GO:0005654,nucleoplasm|GO:0044454,nuclear chromosome part|GO:0005694,chromosome|GO:…	GO:0033613,activating transcription factor binding|GO:0001076,transcription factor activity, RNA polymerase II transcription factor binding|GO:0044877,macromolecular complex binding|GO:0005488,binding|GO:0003676,nucleic acid binding|GO:0003677,DNA binding|GO:1901363,heterocyclic compound binding|GO:0043566,structure-specific DNA binding|GO:0001190,transcriptional activator activity, RNA polymeras…				http://www.uniprot.org/uniprot/O75475	False
Q16630	7.20002	2.848	Q16630	CPSF6	GO:0022607,cellular component assembly|GO:0070271,protein complex biogenesis|GO:0043933,macromolecular complex subunit organization|GO:0090304,nucleic acid metabolic process|GO:0034641,cellular nitrogen compound metabolic process|GO:0006807,nitrogen compound metabolic process|GO:0016043,cellular component organization|GO:0043631,RNA polyadenylation|GO:0071840,cellular component organization or bi…	GO:0044464,cell part|GO:0031974,membrane-enclosed lumen|GO:0043229,intracellular organelle|GO:0043227,membrane-bounded organelle|GO:0043226,organelle|GO:0016604,nuclear body|GO:0031981,nuclear lumen|GO:0005634,nucleus|GO:0016020,membrane|GO:0030529,intracellular ribonucleoprotein complex|GO:0005654,nucleoplasm|GO:0044451,nucleoplasm part|GO:0042382,paraspeckles|GO:0043234,protein complex|GO:00329…	GO:0005488,binding|GO:0005515,protein binding|GO:0097159,organic cyclic compound binding|GO:0044822,poly(A) RNA binding|GO:0000166,nucleotide binding|GO:0036094,small molecule binding|GO:0003723,RNA binding|GO:0003676,nucleic acid binding|GO:1901363,heterocyclic compound binding|GO:1901265,nucleoside phosphate binding|GO:0003729,mRNA binding|GO:0032403,protein complex binding|GO:1990448,exon-exon…	hsa03015,mRNA surveillance pathway			http://www.uniprot.org/uniprot/Q16630	False
Q96CX2	7.13543	2.835	Q96CX2	KCTD12	GO:0051259,protein oligomerization|GO:0022607,cellular component assembly|GO:0071822,protein complex subunit organization|GO:0070271,protein complex biogenesis|GO:0043933,macromolecular complex subunit organization|GO:0006461,protein complex assembly|GO:0051260,protein homooligomerization|GO:0016043,cellular component organization|GO:0065003,macromolecular complex assembly|GO:0044085,cellular com…	GO:0098590,plasma membrane region|GO:0071944,cell periphery|GO:0045202,synapse|GO:0043227,membrane-bounded organelle|GO:0043226,organelle|GO:0030054,cell junction|GO:0097060,synaptic membrane|GO:0070062,extracellular exosome|GO:0098805,whole membrane|GO:0016020,membrane|GO:0031988,membrane-bounded vesicle|GO:0097458,neuron part|GO:0044456,synapse part|GO:0044459,plasma membrane part|GO:0005576,ex…	GO:0097159,organic cyclic compound binding|GO:0044822,poly(A) RNA binding|GO:0005488,binding|GO:0003676,nucleic acid binding|GO:1901363,heterocyclic compound binding|GO:0003723,RNA binding|GO:0005515,protein binding|GO:0042802,identical protein binding				http://www.uniprot.org/uniprot/Q96CX2	False
Q9BUQ8	6.95476	2.798	Q9BUQ8	DDX23	GO:0022607,cellular component assembly|GO:0000245,spliceosomal complex assembly|GO:0043933,macromolecular complex subunit organization|GO:0090304,nucleic acid metabolic process|GO:0034641,cellular nitrogen compound metabolic process|GO:0006807,nitrogen compound metabolic process|GO:0044237,cellular metabolic process|GO:0034622,cellular macromolecular complex assembly|GO:0071840,cellular component…	GO:0044421,extracellular region part|GO:0031974,membrane-enclosed lumen|GO:0043229,intracellular organelle|GO:0043228,non-membrane-bounded organelle|GO:0030529,intracellular ribonucleoprotein complex|GO:0043227,membrane-bounded organelle|GO:0043226,organelle|GO:0005737,cytoplasm|GO:0044446,intracellular organelle part|GO:0070062,extracellular exosome|GO:0031981,nuclear lumen|GO:0005730,nucleolus|…	GO:0016887,ATPase activity|GO:0008026,ATP-dependent helicase activity|GO:0035639,purine ribonucleoside triphosphate binding|GO:0005488,binding|GO:0003676,nucleic acid binding|GO:0008186,RNA-dependent ATPase activity|GO:0043167,ion binding|GO:1901363,heterocyclic compound binding|GO:0001883,purine nucleoside binding|GO:0001882,nucleoside binding|GO:0043168,anion binding|GO:0042623,ATPase activity,…	hsa03040,Spliceosome			http://www.uniprot.org/uniprot/Q9BUQ8	False
Q7L014	6.93069	2.793	Q7L014	DDX46	GO:0019222,regulation of metabolic process|GO:0090304,nucleic acid metabolic process|GO:0034641,cellular nitrogen compound metabolic process|GO:0006807,nitrogen compound metabolic process|GO:0044237,cellular metabolic process|GO:0043170,macromolecule metabolic process|GO:0050789,regulation of biological process|GO:1901360,organic cyclic compound metabolic process|GO:0006139,nucleobase-containing …	GO:0031974,membrane-enclosed lumen|GO:0043229,intracellular organelle|GO:0043227,membrane-bounded organelle|GO:0043226,organelle|GO:0016607,nuclear speck|GO:0016604,nuclear body|GO:0031981,nuclear lumen|GO:0005634,nucleus|GO:0005654,nucleoplasm|GO:0044451,nucleoplasm part|GO:0043231,intracellular membrane-bounded organelle|GO:0043233,organelle lumen|GO:0044464,cell part|GO:0005623,cell|GO:0005622…	GO:0016887,ATPase activity|GO:0008026,ATP-dependent helicase activity|GO:0035639,purine ribonucleoside triphosphate binding|GO:0005488,binding|GO:0003676,nucleic acid binding|GO:0008186,RNA-dependent ATPase activity|GO:0043167,ion binding|GO:1901363,heterocyclic compound binding|GO:0001883,purine nucleoside binding|GO:0001882,nucleoside binding|GO:0043168,anion binding|GO:0042623,ATPase activity,…	hsa03040,Spliceosome			http://www.uniprot.org/uniprot/Q7L014	False
P27695	6.87329	2.781	P27695	APEX1	GO:0080090,regulation of primary metabolic process|GO:0019222,regulation of metabolic process|GO:0060249,anatomical structure homeostasis|GO:0048584,positive regulation of response to stimulus|GO:0048583,regulation of response to stimulus|GO:1901362,organic cyclic compound biosynthetic process|GO:0071840,cellular component organization or biogenesis|GO:0044710,single-organism metabolic process|GO…	GO:0005783,endoplasmic reticulum|GO:0031974,membrane-enclosed lumen|GO:0043229,intracellular organelle|GO:0043228,non-membrane-bounded organelle|GO:0030529,intracellular ribonucleoprotein complex|GO:0043227,membrane-bounded organelle|GO:0043226,organelle|GO:0016607,nuclear speck|GO:0016604,nuclear body|GO:0031981,nuclear lumen|GO:0005730,nucleolus|GO:0005813,centrosome|GO:0005634,nucleus|GO:00057…	GO:0003714,transcription corepressor activity|GO:0016796,exonuclease activity, active with either ribo- or deoxyribonucleic acids and producing 5'-phosphomonoesters|GO:0003677,DNA binding|GO:0003713,transcription coactivator activity|GO:0004527,exonuclease activity|GO:0016799,hydrolase activity, hydrolyzing N-glycosyl compounds|GO:0016798,hydrolase activity, acting on glycosyl bonds|GO:0003712,tr…	hsa03410,Base excision repair			http://www.uniprot.org/uniprot/P27695	False
Q14011	6.86852	2.78	Q14011	CIRBP	GO:0080090,regulation of primary metabolic process|GO:0019222,regulation of metabolic process|GO:0071840,cellular component organization or biogenesis|GO:0010605,negative regulation of macromolecule metabolic process|GO:0010604,positive regulation of macromolecule metabolic process|GO:0010608,posttranscriptional regulation of gene expression|GO:0043043,peptide biosynthetic process|GO:0048518,posi…	GO:0035770,ribonucleoprotein granule|GO:0031974,membrane-enclosed lumen|GO:0043229,intracellular organelle|GO:0043228,non-membrane-bounded organelle|GO:0036464,cytoplasmic ribonucleoprotein granule|GO:0043227,membrane-bounded organelle|GO:0043226,organelle|GO:0005737,cytoplasm|GO:0031981,nuclear lumen|GO:0005634,nucleus|GO:0030529,intracellular ribonucleoprotein complex|GO:0005654,nucleoplasm|GO:…	GO:0005488,binding|GO:0070181,small ribosomal subunit rRNA binding|GO:0005515,protein binding|GO:0000166,nucleotide binding|GO:0044822,poly(A) RNA binding|GO:0019843,rRNA binding|GO:0036094,small molecule binding|GO:0003723,RNA binding|GO:0003676,nucleic acid binding|GO:0097159,organic cyclic compound binding|GO:0030371,translation repressor activity|GO:0003729,mRNA binding|GO:0045182,translation…				http://www.uniprot.org/uniprot/Q14011	False
O00154	6.82581	2.771	O00154	ACOT7	GO:0009165,nucleotide biosynthetic process|GO:0044281,small molecule metabolic process|GO:0044282,small molecule catabolic process|GO:0044283,small molecule biosynthetic process|GO:1901362,organic cyclic compound biosynthetic process|GO:0042451,purine nucleoside biosynthetic process|GO:1901360,organic cyclic compound metabolic process|GO:0044712,single-organism catabolic process|GO:0044710,single…	GO:0031974,membrane-enclosed lumen|GO:0043229,intracellular organelle|GO:0043227,membrane-bounded organelle|GO:0043226,organelle|GO:0005737,cytoplasm|GO:0042995,cell projection|GO:0070062,extracellular exosome|GO:0031981,nuclear lumen|GO:0005634,nucleus|GO:0005739,mitochondrion|GO:0031988,membrane-bounded vesicle|GO:0005654,nucleoplasm|GO:0097458,neuron part|GO:0043005,neuron projection|GO:004429…	GO:1901681,sulfur compound binding|GO:0016787,hydrolase activity|GO:0016289,CoA hydrolase activity|GO:0016790,thiolester hydrolase activity|GO:0000062,fatty-acyl-CoA binding|GO:0005488,binding|GO:0016788,hydrolase activity, acting on ester bonds|GO:0036042,long-chain fatty acyl-CoA binding|GO:0050662,coenzyme binding|GO:0003824,catalytic activity|GO:0016290,palmitoyl-CoA hydrolase activity|GO:005…	hsa00062,Fatty acid elongation|hsa01040,Biosynthesis of unsaturated fatty acids			http://www.uniprot.org/uniprot/O00154	False
P10599	6.80691	2.767	P10599	TXN	GO:0033157,regulation of intracellular protein transport|GO:0032148,activation of protein kinase B activity|GO:0044238,primary metabolic process|GO:0019220,regulation of phosphate metabolic process|GO:0080090,regulation of primary metabolic process|GO:0019222,regulation of metabolic process|GO:0051049,regulation of transport|GO:0048585,negative regulation of response to stimulus|GO:0048584,positi…	GO:0031974,membrane-enclosed lumen|GO:0043229,intracellular organelle|GO:0043227,membrane-bounded organelle|GO:0043226,organelle|GO:0005737,cytoplasm|GO:0070062,extracellular exosome|GO:0031981,nuclear lumen|GO:0005634,nucleus|GO:0005739,mitochondrion|GO:0031988,membrane-bounded vesicle|GO:0005654,nucleoplasm|GO:1903561,extracellular vesicle|GO:0031982,vesicle|GO:0043230,extracellular organelle|G…	GO:0005488,binding|GO:0003676,nucleic acid binding|GO:0005515,protein binding|GO:0097159,organic cyclic compound binding|GO:0044822,poly(A) RNA binding|GO:0003824,catalytic activity|GO:0016671,oxidoreductase activity, acting on a sulfur group of donors, disulfide as acceptor|GO:0003723,RNA binding|GO:0016667,oxidoreductase activity, acting on a sulfur group of donors|GO:0015036,disulfide oxidored…	hsa05418,Fluid shear stress and atherosclerosis|hsa04621,NOD-like receptor signaling pathway			http://www.uniprot.org/uniprot/P10599	False
P47985	6.77396	2.76	P47985	UQCRFS1	GO:1902600,hydrogen ion transmembrane transport|GO:0046677,response to antibiotic|GO:0044281,small molecule metabolic process|GO:0006091,generation of precursor metabolites and energy|GO:0044699,single-organism process|GO:0009719,response to endogenous stimulus|GO:0044710,single-organism metabolic process|GO:0015992,proton transport|GO:0009636,response to toxic substance|GO:0051179,localization|G…	GO:0044464,cell part|GO:1990204,oxidoreductase complex|GO:0043229,intracellular organelle|GO:0070069,cytochrome complex|GO:0043227,membrane-bounded organelle|GO:0043226,organelle|GO:0031224,intrinsic component of membrane|GO:0005737,cytoplasm|GO:0031090,organelle membrane|GO:0098796,membrane protein complex|GO:0043209,myelin sheath|GO:0016021,integral component of membrane|GO:0016020,membrane|GO:…	GO:0008121,ubiquinol-cytochrome-c reductase activity|GO:0044877,macromolecular complex binding|GO:0005488,binding|GO:0016491,oxidoreductase activity|GO:0043169,cation binding|GO:0051540,metal cluster binding|GO:0015077,monovalent inorganic cation transmembrane transporter activity|GO:0043167,ion binding|GO:0032403,protein complex binding|GO:0046872,metal ion binding|GO:0016681,oxidoreductase acti…	hsa00190,Oxidative phosphorylation|hsa04714,Thermogenesis|hsa01100,Metabolic pathways|hsa04260,Cardiac muscle contraction|hsa05012,Parkinson disease|hsa05016,Huntington disease|hsa05010,Alzheimer disease|hsa04932,Non-alcoholic fatty liver disease			http://www.uniprot.org/uniprot/P47985	False
P19338	6.7132	2.747	P19338	NCL	GO:0032640,tumor necrosis factor production|GO:0008104,protein localization|GO:0080090,regulation of primary metabolic process|GO:0019222,regulation of metabolic process|GO:0051047,positive regulation of secretion|GO:0051049,regulation of transport|GO:0072359,circulatory system development|GO:0072358,cardiovascular system development|GO:1901362,organic cyclic compound biosynthetic process|GO:0071…	GO:0035770,ribonucleoprotein granule|GO:0031974,membrane-enclosed lumen|GO:0043229,intracellular organelle|GO:0043228,non-membrane-bounded organelle|GO:0036464,cytoplasmic ribonucleoprotein granule|GO:0030529,intracellular ribonucleoprotein complex|GO:0043227,membrane-bounded organelle|GO:0043226,organelle|GO:0005737,cytoplasm|GO:0070062,extracellular exosome|GO:0031981,nuclear lumen|GO:0005730,n…	GO:0008022,protein C-terminus binding|GO:0042393,histone binding|GO:0042134,rRNA primary transcript binding|GO:0050840,extracellular matrix binding|GO:1990631,ErbB-4 class receptor binding|GO:0043169,cation binding|GO:0005488,binding|GO:0003676,nucleic acid binding|GO:0003677,DNA binding|GO:0000166,nucleotide binding|GO:1901363,heterocyclic compound binding|GO:1901265,nucleoside phosphate binding…	hsa05130,Pathogenic Escherichia coli infection			http://www.uniprot.org/uniprot/P19338	False
Q9BPU6	6.65298	2.734	Q9BPU6	DPYSL5	GO:0032502,developmental process|GO:0044707,single-multicellular organism process|GO:0008152,metabolic process|GO:0030030,cell projection organization|GO:0030154,cell differentiation|GO:0048468,cell development|GO:0006928,movement of cell or subcellular component|GO:0023052,signaling|GO:0007165,signal transduction|GO:0031175,neuron projection development|GO:0007411,axon guidance|GO:0032989,cellul…	GO:0005737,cytoplasm|GO:0005623,cell|GO:0044464,cell part|GO:0005829,cytosol|GO:0044297,cell body|GO:0030425,dendrite|GO:0005622,intracellular|GO:0097458,neuron part|GO:0044444,cytoplasmic part|GO:0036477,somatodendritic compartment|GO:0043005,neuron projection|GO:0044424,intracellular part|GO:0042995,cell projection|GO:0043025,neuronal cell body|GO:0120038,plasma membrane bounded cell projection…	GO:0016787,hydrolase activity|GO:0015631,tubulin binding|GO:0008092,cytoskeletal protein binding|GO:0016810,hydrolase activity, acting on carbon-nitrogen (but not peptide) bonds|GO:0003824,catalytic activity|GO:0044877,macromolecular complex binding|GO:0005488,binding|GO:0005515,protein binding|GO:0032403,protein complex binding|GO:0008017,microtubule binding|GO:0016812,hydrolase activity, acting…	hsa04360,Axon guidance			http://www.uniprot.org/uniprot/Q9BPU6	False
P06748	6.60702	2.724	P06748	NPM1	GO:0032069,regulation of nuclease activity|GO:0051169,nuclear transport|GO:0043549,regulation of kinase activity|GO:0019220,regulation of phosphate metabolic process|GO:0080090,regulation of primary metabolic process|GO:0019222,regulation of metabolic process|GO:0048583,regulation of response to stimulus|GO:0008104,protein localization|GO:0031055,chromatin remodeling at centromere|GO:0007165,sign…	GO:0031974,membrane-enclosed lumen|GO:0043229,intracellular organelle|GO:0043228,non-membrane-bounded organelle|GO:0031616,spindle pole centrosome|GO:0005924,cell-substrate adherens junction|GO:0005815,microtubule organizing center|GO:0043227,membrane-bounded organelle|GO:0043226,organelle|GO:0030054,cell junction|GO:0030055,cell-substrate junction|GO:0005856,cytoskeleton|GO:0005819,spindle|GO:00…	GO:0042393,histone binding|GO:0019207,kinase regulator activity|GO:0019899,enzyme binding|GO:0044877,macromolecular complex binding|GO:0005488,binding|GO:0003676,nucleic acid binding|GO:0004857,enzyme inhibitor activity|GO:0098772,molecular function regulator|GO:1901363,heterocyclic compound binding|GO:0030957,Tat protein binding|GO:0003713,transcription coactivator activity|GO:0003712,transcript…				http://www.uniprot.org/uniprot/P06748	False
P61978	6.57049	2.716	P61978	HNRNPK	GO:0080090,regulation of primary metabolic process|GO:0019222,regulation of metabolic process|GO:0051049,regulation of transport|GO:0007165,signal transduction|GO:0048260,positive regulation of receptor-mediated endocytosis|GO:1901362,organic cyclic compound biosynthetic process|GO:0071840,cellular component organization or biogenesis|GO:0051716,cellular response to stimulus|GO:0010604,positive r…	GO:0042995,cell projection|GO:0015629,actin cytoskeleton|GO:0005924,cell-substrate adherens junction|GO:0031974,membrane-enclosed lumen|GO:0043229,intracellular organelle|GO:0043228,non-membrane-bounded organelle|GO:0000785,chromatin|GO:0000228,nuclear chromosome|GO:0005925,focal adhesion|GO:0043227,membrane-bounded organelle|GO:0043226,organelle|GO:0030054,cell junction|GO:0030055,cell-substrate…	GO:0001012,RNA polymerase II regulatory region DNA binding|GO:0001159,core promoter proximal region DNA binding|GO:0001077,transcriptional activator activity, RNA polymerase II core promoter proximal region sequence-specific binding|GO:0005488,binding|GO:0003676,nucleic acid binding|GO:0003677,DNA binding|GO:1901363,heterocyclic compound binding|GO:0043565,sequence-specific DNA binding|GO:0043566…	hsa05206,MicroRNAs in cancer|hsa03040,Spliceosome|hsa05203,Viral carcinogenesis			http://www.uniprot.org/uniprot/P61978	False
Q92769	6.42635	2.684	Q92769	HDAC2	GO:0007599,hemostasis|GO:0034605,cellular response to heat|GO:0007596,blood coagulation|GO:0016358,dendrite development|GO:2000736,regulation of stem cell differentiation|GO:0098773,skin epidermis development|GO:0070933,histone H4 deacetylation|GO:0070932,histone H3 deacetylation|GO:0051716,cellular response to stimulus|GO:0014031,mesenchymal cell development|GO:0043207,response to external bioti…	GO:0031974,membrane-enclosed lumen|GO:0043229,intracellular organelle|GO:0043228,non-membrane-bounded organelle|GO:0000785,chromatin|GO:0005623,cell|GO:0000228,nuclear chromosome|GO:0043227,membrane-bounded organelle|GO:0043226,organelle|GO:0034708,methyltransferase complex|GO:0005737,cytoplasm|GO:0070822,Sin3-type complex|GO:0070603,SWI/SNF superfamily-type complex|GO:0031519,PcG protein complex…	GO:0032041,NAD-dependent histone deacetylase activity (H3-K14 specific)|GO:0031078,histone deacetylase activity (H3-K14 specific)|GO:0031072,heat shock protein binding|GO:0001012,RNA polymerase II regulatory region DNA binding|GO:0019899,enzyme binding|GO:0001159,core promoter proximal region DNA binding|GO:0001158,enhancer sequence-specific DNA binding|GO:0031491,nucleosome binding|GO:0031490,ch…	hsa04110,Cell cycle|hsa05206,MicroRNAs in cancer|hsa05200,Pathways in cancer|hsa05203,Viral carcinogenesis|hsa05202,Transcriptional misregulation in cancer|hsa04330,Notch signaling pathway|hsa05169,Epstein-Barr virus infection|hsa05034,Alcoholism|hsa05220,Chronic myeloid leukemia|hsa05165,Human papillomavirus infection|hsa05016,Huntington disease|hsa04919,Thyroid hormone signaling pathway|hsa0421…		D00304,Divalproex sodium (USP); Valproate semisodium (INN); Depakote (TN)|D00399,Valproic acid (USP); Depakene (TN)|D00710,Sodium valproate (JP16); Valproate sodium (USAN); Depakene (TN); Selenica (TN)|D06320,Vorinostat (JAN/USAN); Zolinza (TN)|D06637,Romidepsin (JAN/USAN/INN); Istodax (TN)|D08667,Calcium valproate; Valproic acid calcium salt; Convulsofin (TN)|D08870,Belinostat (USAN/INN); Beleod…	http://www.uniprot.org/uniprot/Q92769	False
Q9UKM9	6.35548	2.668	Q9UKM9	RALY	GO:0090304,nucleic acid metabolic process|GO:0034641,cellular nitrogen compound metabolic process|GO:0006807,nitrogen compound metabolic process|GO:0044237,cellular metabolic process|GO:1901360,organic cyclic compound metabolic process|GO:0006139,nucleobase-containing compound metabolic process|GO:0044260,cellular macromolecule metabolic process|GO:0071704,organic substance metabolic process|GO:0…	GO:0005622,intracellular|GO:0032991,macromolecular complex|GO:0043231,intracellular membrane-bounded organelle|GO:0071013,catalytic step 2 spliceosome|GO:0044464,cell part|GO:0005623,cell|GO:0043226,organelle|GO:0044446,intracellular organelle part|GO:0043229,intracellular organelle|GO:0044428,nuclear part|GO:0044422,organelle part|GO:0044424,intracellular part|GO:0030529,intracellular ribonucleo…	GO:0005515,protein binding|GO:0097159,organic cyclic compound binding|GO:0044822,poly(A) RNA binding|GO:0000166,nucleotide binding|GO:0036094,small molecule binding|GO:0003723,RNA binding|GO:0003676,nucleic acid binding|GO:1901363,heterocyclic compound binding|GO:1901265,nucleoside phosphate binding|GO:0005488,binding|GO:0000989,transcription factor activity, transcription factor binding|GO:00037…				http://www.uniprot.org/uniprot/Q9UKM9	False
Q3MHD2	6.28102	2.651	Q3MHD2	LSM12	GO:0016070,RNA metabolic process|GO:0006139,nucleobase-containing compound metabolic process|GO:0044238,primary metabolic process|GO:0009987,cellular process|GO:0006725,cellular aromatic compound metabolic process|GO:0044237,cellular metabolic process|GO:0043170,macromolecule metabolic process|GO:0090304,nucleic acid metabolic process|GO:0071704,organic substance metabolic process|GO:0034641,cell…						http://www.uniprot.org/uniprot/Q3MHD2	False
O43684	6.19885	2.632	O43684	BUB3	GO:0080090,regulation of primary metabolic process|GO:0032434,regulation of proteasomal ubiquitin-dependent protein catabolic process|GO:0032435,negative regulation of proteasomal ubiquitin-dependent protein catabolic process|GO:0044257,cellular protein catabolic process|GO:0000280,nuclear division|GO:0007165,signal transduction|GO:0010965,regulation of mitotic sister chromatid separation|GO:0071…	GO:0031974,membrane-enclosed lumen|GO:0043229,intracellular organelle|GO:0043228,non-membrane-bounded organelle|GO:0043227,membrane-bounded organelle|GO:0043226,organelle|GO:0005737,cytoplasm|GO:0031981,nuclear lumen|GO:0005634,nucleus|GO:0005654,nucleoplasm|GO:0000776,kinetochore|GO:0005694,chromosome|GO:0000779,condensed chromosome, centromeric region|GO:0000793,condensed chromosome|GO:0000775,…	GO:0005488,binding|GO:0005515,protein binding|GO:0043130,ubiquitin binding|GO:0032182,ubiquitin-like protein binding	hsa04110,Cell cycle|hsa05166,Human T-cell leukemia virus 1 infection			http://www.uniprot.org/uniprot/O43684	False
Q5SZK8	6.16457	2.624	Q5SZK8	FREM2	GO:0009653,anatomical structure morphogenesis|GO:0007275,multicellular organism development|GO:0044699,single-organism process|GO:0002009,morphogenesis of an epithelium|GO:0048513,animal organ development|GO:0043583,ear development|GO:0048729,tissue morphogenesis|GO:0022610,biological adhesion|GO:0032502,developmental process|GO:0032501,multicellular organismal process|GO:0098609,cell-cell adhesi…	GO:0031012,extracellular matrix|GO:0071944,cell periphery|GO:0043227,membrane-bounded organelle|GO:0043226,organelle|GO:0031224,intrinsic component of membrane|GO:0070062,extracellular exosome|GO:0016021,integral component of membrane|GO:0016020,membrane|GO:0031988,membrane-bounded vesicle|GO:0005886,plasma membrane|GO:1903561,extracellular vesicle|GO:0031982,vesicle|GO:0005604,basement membrane|…	GO:0043169,cation binding|GO:0043167,ion binding|GO:0005488,binding|GO:0046872,metal ion binding|GO:0005509,calcium ion binding|GO:0005515,protein binding	hsa04512,ECM-receptor interaction			http://www.uniprot.org/uniprot/Q5SZK8	False
P63162	6.15176	2.621	P63162	SNRPN	GO:0090304,nucleic acid metabolic process|GO:0034641,cellular nitrogen compound metabolic process|GO:0006807,nitrogen compound metabolic process|GO:0044237,cellular metabolic process|GO:1901360,organic cyclic compound metabolic process|GO:0009719,response to endogenous stimulus|GO:0006139,nucleobase-containing compound metabolic process|GO:0044260,cellular macromolecule metabolic process|GO:00717…	GO:0071004,U2-type prespliceosome|GO:0043229,intracellular organelle|GO:0043227,membrane-bounded organelle|GO:0043226,organelle|GO:0005737,cytoplasm|GO:0097525,spliceosomal snRNP complex|GO:0005634,nucleus|GO:0030529,intracellular ribonucleoprotein complex|GO:0046540,U4/U6 x U5 tri-snRNP complex|GO:0071010,prespliceosome|GO:0071013,catalytic step 2 spliceosome|GO:0044424,intracellular part|GO:003…	GO:0003676,nucleic acid binding|GO:0097159,organic cyclic compound binding|GO:0044822,poly(A) RNA binding|GO:0003723,RNA binding|GO:0005515,protein binding|GO:1901363,heterocyclic compound binding|GO:0005488,binding				http://www.uniprot.org/uniprot/P63162	False
Q15233	6.05027	2.597	Q15233	NONO	GO:2001234,negative regulation of apoptotic signaling pathway|GO:0080090,regulation of primary metabolic process|GO:0019222,regulation of metabolic process|GO:2001233,regulation of apoptotic signaling pathway|GO:0048585,negative regulation of response to stimulus|GO:2001141,regulation of RNA biosynthetic process|GO:0048583,regulation of response to stimulus|GO:0043523,regulation of neuron apoptot…	GO:0031974,membrane-enclosed lumen|GO:0043229,intracellular organelle|GO:0043228,non-membrane-bounded organelle|GO:0043227,membrane-bounded organelle|GO:0043226,organelle|GO:0034399,nuclear periphery|GO:0016604,nuclear body|GO:0031981,nuclear lumen|GO:0005730,nucleolus|GO:0005634,nucleus|GO:0016020,membrane|GO:0005654,nucleoplasm|GO:0044798,nuclear transcription factor complex|GO:0044451,nucleopl…	GO:0000980,RNA polymerase II distal enhancer sequence-specific DNA binding|GO:0001012,RNA polymerase II regulatory region DNA binding|GO:0001158,enhancer sequence-specific DNA binding|GO:0044877,macromolecular complex binding|GO:0005488,binding|GO:0003676,nucleic acid binding|GO:0003677,DNA binding|GO:1901363,heterocyclic compound binding|GO:1901265,nucleoside phosphate binding|GO:0043565,sequenc…				http://www.uniprot.org/uniprot/Q15233	False
P07900	6.01265	2.588	P07900	HSP90AA1	GO:0008104,protein localization|GO:0006909,phagocytosis|GO:0019222,regulation of metabolic process|GO:0000086,G2/M transition of mitotic cell cycle|GO:0034605,cellular response to heat|GO:0048584,positive regulation of response to stimulus|GO:0048583,regulation of response to stimulus|GO:0009408,response to heat|GO:0061024,membrane organization|GO:0007008,outer mitochondrial membrane organization…	GO:0098590,plasma membrane region|GO:0044421,extracellular region part|GO:0048770,pigment granule|GO:0031974,membrane-enclosed lumen|GO:0030139,endocytic vesicle|GO:0043229,intracellular organelle|GO:0071944,cell periphery|GO:0060205,cytoplasmic membrane-bounded vesicle lumen|GO:0005622,intracellular|GO:0043227,membrane-bounded organelle|GO:0043226,organelle|GO:0005737,cytoplasm|GO:0044433,cytopl…	GO:0016887,ATPase activity|GO:0035639,purine ribonucleoside triphosphate binding|GO:0019899,enzyme binding|GO:0051020,GTPase binding|GO:0044877,macromolecular complex binding|GO:0005488,binding|GO:0003676,nucleic acid binding|GO:0098772,molecular function regulator|GO:1901363,heterocyclic compound binding|GO:0001883,purine nucleoside binding|GO:0001882,nucleoside binding|GO:0043168,anion binding|…	hsa04659,Th17 cell differentiation|hsa05418,Fluid shear stress and atherosclerosis|hsa04612,Antigen processing and presentation|hsa04621,NOD-like receptor signaling pathway|hsa04657,IL-17 signaling pathway|hsa05200,Pathways in cancer|hsa04141,Protein processing in endoplasmic reticulum|hsa04914,Progesterone-mediated oocyte maturation|hsa04915,Estrogen signaling pathway|hsa05215,Prostate cancer|hs…		D09375,Retaspimycin (USAN/INN)|D09376,Retaspimycin hydrochloride (USAN)|D10126,Ganetespib (USAN)|D10646,Luminespib (USAN/INN)|D10647,Luminespib mesylate (USAN)|D10719,Onalespib (USAN/INN)	http://www.uniprot.org/uniprot/P07900	False
P22626	5.95871	2.575	P22626	HNRNPA2B1	GO:0080090,regulation of primary metabolic process|GO:0019222,regulation of metabolic process|GO:0050684,regulation of mRNA processing|GO:0050686,negative regulation of mRNA processing|GO:1901362,organic cyclic compound biosynthetic process|GO:1901360,organic cyclic compound metabolic process|GO:0010605,negative regulation of macromolecule metabolic process|GO:0048519,negative regulation of biolo…	GO:0031974,membrane-enclosed lumen|GO:0043229,intracellular organelle|GO:0043227,membrane-bounded organelle|GO:0043226,organelle|GO:0005737,cytoplasm|GO:0031981,nuclear lumen|GO:0005634,nucleus|GO:0016020,membrane|GO:0030529,intracellular ribonucleoprotein complex|GO:0005654,nucleoplasm|GO:0071013,catalytic step 2 spliceosome|GO:0032991,macromolecular complex|GO:0043231,intracellular membrane-bou…	GO:0036002,pre-mRNA binding|GO:0043566,structure-specific DNA binding|GO:0005515,protein binding|GO:0097157,pre-mRNA intronic binding|GO:0043047,single-stranded telomeric DNA binding|GO:0042162,telomeric DNA binding|GO:0044822,poly(A) RNA binding|GO:1901363,heterocyclic compound binding|GO:0043565,sequence-specific DNA binding|GO:0000166,nucleotide binding|GO:0036094,small molecule binding|GO:000…				http://www.uniprot.org/uniprot/P22626	False
P35659	5.95871	2.575	P35659	DEK	GO:0080090,regulation of primary metabolic process|GO:0019222,regulation of metabolic process|GO:0048583,regulation of response to stimulus|GO:0007165,signal transduction|GO:2001032,regulation of double-strand break repair via nonhomologous end joining|GO:1901362,organic cyclic compound biosynthetic process|GO:1901360,organic cyclic compound metabolic process|GO:0044710,single-organism metabolic …	GO:0005737,cytoplasm|GO:0043231,intracellular membrane-bounded organelle|GO:0043232,intracellular non-membrane-bounded organelle|GO:0005634,nucleus|GO:0044464,cell part|GO:0044444,cytoplasmic part|GO:0005623,cell|GO:0005622,intracellular|GO:0044424,intracellular part|GO:0043229,intracellular organelle|GO:0043228,non-membrane-bounded organelle|GO:0043292,contractile fiber|GO:0043227,membrane-bound…	GO:0042393,histone binding|GO:0005515,protein binding|GO:0097159,organic cyclic compound binding|GO:0044822,poly(A) RNA binding|GO:0003723,RNA binding|GO:0003676,nucleic acid binding|GO:0003677,DNA binding|GO:1901363,heterocyclic compound binding|GO:0005488,binding|GO:0003682,chromatin binding				http://www.uniprot.org/uniprot/P35659	False
P00558	5.91345	2.564	P00558	PGK1	GO:0009167,purine ribonucleoside monophosphate metabolic process|GO:0061621,canonical glycolysis|GO:0061620,glycolytic process through glucose-6-phosphate|GO:0044281,small molecule metabolic process|GO:0009161,ribonucleoside monophosphate metabolic process|GO:1901360,organic cyclic compound metabolic process|GO:0044712,single-organism catabolic process|GO:0044710,single-organism metabolic process…	GO:0043227,membrane-bounded organelle|GO:0043226,organelle|GO:0005737,cytoplasm|GO:0031982,vesicle|GO:0098805,whole membrane|GO:0016020,membrane|GO:0031988,membrane-bounded vesicle|GO:0098589,membrane region|GO:1903561,extracellular vesicle|GO:0070062,extracellular exosome|GO:0043230,extracellular organelle|GO:0005829,cytosol|GO:0045121,membrane raft|GO:0044464,cell part|GO:0005623,cell|GO:000562…	GO:0035639,purine ribonucleoside triphosphate binding|GO:0005488,binding|GO:0000166,nucleotide binding|GO:1901363,heterocyclic compound binding|GO:1901265,nucleoside phosphate binding|GO:0001882,nucleoside binding|GO:0043168,anion binding|GO:0043167,ion binding|GO:0016740,transferase activity|GO:0001883,purine nucleoside binding|GO:0032549,ribonucleoside binding|GO:0017076,purine nucleotide bindi…	hsa01230,Biosynthesis of amino acids|hsa01200,Carbon metabolism|hsa01100,Metabolic pathways|hsa00010,Glycolysis / Gluconeogenesis|hsa04066,HIF-1 signaling pathway			http://www.uniprot.org/uniprot/P00558	False
P53007	5.90935	2.563	P53007	SLC25A1	GO:0006842,tricarboxylic acid transport|GO:0009108,coenzyme biosynthetic process|GO:0006637,acyl-CoA metabolic process|GO:0006732,coenzyme metabolic process|GO:0046364,monosaccharide biosynthetic process|GO:0006639,acylglycerol metabolic process|GO:0006638,neutral lipid metabolic process|GO:0046949,fatty-acyl-CoA biosynthetic process|GO:0044249,cellular biosynthetic process|GO:0006820,anion trans…	GO:0044421,extracellular region part|GO:0044464,cell part|GO:0031975,envelope|GO:0043229,intracellular organelle|GO:0043227,membrane-bounded organelle|GO:0043226,organelle|GO:0031224,intrinsic component of membrane|GO:0005737,cytoplasm|GO:0031090,organelle membrane|GO:0016021,integral component of membrane|GO:0016020,membrane|GO:0044444,cytoplasmic part|GO:0005739,mitochondrion|GO:0031988,membran…	GO:0022891,substrate-specific transmembrane transporter activity|GO:0022892,substrate-specific transporter activity|GO:0005342,organic acid transmembrane transporter activity|GO:0008514,organic anion transmembrane transporter activity|GO:0005215,transporter activity|GO:0008509,anion transmembrane transporter activity|GO:0015137,citrate transmembrane transporter activity|GO:0015075,ion transmembra…				http://www.uniprot.org/uniprot/P53007	False
P16949	5.88483	2.557	P16949	STMN1	GO:0031110,regulation of microtubule polymerization or depolymerization|GO:0031111,negative regulation of microtubule polymerization or depolymerization|GO:0031113,regulation of microtubule polymerization|GO:0031115,negative regulation of microtubule polymerization|GO:0048468,cell development|GO:0060322,head development|GO:0007165,signal transduction|GO:0071840,cellular component organization or …	GO:0043229,intracellular organelle|GO:0043228,non-membrane-bounded organelle|GO:0005874,microtubule|GO:0043226,organelle|GO:0005856,cytoskeleton|GO:1903561,extracellular vesicle|GO:0031982,vesicle|GO:0043227,membrane-bounded organelle|GO:0016020,membrane|GO:0031988,membrane-bounded vesicle|GO:0097458,neuron part|GO:0044430,cytoskeletal part|GO:0043005,neuron projection|GO:0005737,cytoplasm|GO:001…	GO:0015631,tubulin binding|GO:0004871,signal transducer activity|GO:0008092,cytoskeletal protein binding|GO:0060089,molecular transducer activity|GO:0005488,binding|GO:0005515,protein binding	hsa05206,MicroRNAs in cancer|hsa04010,MAPK signaling pathway			http://www.uniprot.org/uniprot/P16949	False
O43390	5.86853	2.553	O43390	HNRNPR	GO:0090304,nucleic acid metabolic process|GO:0034641,cellular nitrogen compound metabolic process|GO:0006807,nitrogen compound metabolic process|GO:0044237,cellular metabolic process|GO:1901360,organic cyclic compound metabolic process|GO:0006139,nucleobase-containing compound metabolic process|GO:0044260,cellular macromolecule metabolic process|GO:0071704,organic substance metabolic process|GO:0…	GO:0031974,membrane-enclosed lumen|GO:0043229,intracellular organelle|GO:0043228,non-membrane-bounded organelle|GO:0043227,membrane-bounded organelle|GO:0043226,organelle|GO:0005737,cytoplasm|GO:0031981,nuclear lumen|GO:0005730,nucleolus|GO:0005634,nucleus|GO:0030529,intracellular ribonucleoprotein complex|GO:0005654,nucleoplasm|GO:0071013,catalytic step 2 spliceosome|GO:0032991,macromolecular co…	GO:0005515,protein binding|GO:0097159,organic cyclic compound binding|GO:0044822,poly(A) RNA binding|GO:0000166,nucleotide binding|GO:0036094,small molecule binding|GO:0003723,RNA binding|GO:0003676,nucleic acid binding|GO:1901363,heterocyclic compound binding|GO:1901265,nucleoside phosphate binding|GO:0005488,binding|GO:0003729,mRNA binding|GO:0003730,mRNA 3'-UTR binding				http://www.uniprot.org/uniprot/O43390	False
P22087	5.828	2.543	P22087	FBL	GO:0006479,protein methylation|GO:0033967,box C/D snoRNA metabolic process|GO:0044238,primary metabolic process|GO:0008152,metabolic process|GO:0043933,macromolecular complex subunit organization|GO:0030154,cell differentiation|GO:0010467,gene expression|GO:0009451,RNA modification|GO:0090304,nucleic acid metabolic process|GO:0034641,cellular nitrogen compound metabolic process|GO:0001503,ossific…	GO:0032040,small-subunit processome|GO:0005732,small nucleolar ribonucleoprotein complex|GO:0031974,membrane-enclosed lumen|GO:0030684,preribosome|GO:0043229,intracellular organelle|GO:0043228,non-membrane-bounded organelle|GO:0030529,intracellular ribonucleoprotein complex|GO:0043227,membrane-bounded organelle|GO:0043226,organelle|GO:0016604,nuclear body|GO:0070062,extracellular exosome|GO:00319…	GO:0042054,histone methyltransferase activity|GO:0008649,rRNA methyltransferase activity|GO:0005515,protein binding|GO:0003824,catalytic activity|GO:1990259,histone-glutamine methyltransferase activity|GO:0036009,protein-glutamine N-methyltransferase activity|GO:0016740,transferase activity|GO:0016741,transferase activity, transferring one-carbon groups|GO:1901363,heterocyclic compound binding|GO…	hsa03008,Ribosome biogenesis in eukaryotes			http://www.uniprot.org/uniprot/P22087	False
P09429	5.73582	2.52	P09429	HMGB1	GO:0042221,response to chemical|GO:0006909,phagocytosis|GO:0080090,regulation of primary metabolic process|GO:0019222,regulation of metabolic process|GO:0033151,V(D)J recombination|GO:0051049,regulation of transport|GO:0043277,apoptotic cell clearance|GO:0048468,cell development|GO:0043933,macromolecular complex subunit organization|GO:0006325,chromatin organization|GO:0002437,inflammatory respon…	GO:0031974,membrane-enclosed lumen|GO:0043229,intracellular organelle|GO:0043228,non-membrane-bounded organelle|GO:0043227,membrane-bounded organelle|GO:0043226,organelle|GO:0005615,extracellular space|GO:0031981,nuclear lumen|GO:0005634,nucleus|GO:0005654,nucleoplasm|GO:0005694,chromosome|GO:0017053,transcriptional repressor complex|GO:0009986,cell surface|GO:0000793,condensed chromosome|GO:0043…	GO:0042056,chemoattractant activity|GO:0005125,cytokine activity|GO:0050786,RAGE receptor binding|GO:0044877,macromolecular complex binding|GO:0005488,binding|GO:0003676,nucleic acid binding|GO:0003677,DNA binding|GO:1901363,heterocyclic compound binding|GO:0070491,repressing transcription factor binding|GO:0043566,structure-specific DNA binding|GO:0097100,supercoiled DNA binding|GO:0003690,doubl…	hsa04140,Autophagy - animal|hsa03410,Base excision repair|hsa04217,Necroptosis			http://www.uniprot.org/uniprot/P09429	False
Q969H8	5.61	2.488	Q969H8	MYDGF	GO:0044238,primary metabolic process|GO:0019220,regulation of phosphate metabolic process|GO:0080090,regulation of primary metabolic process|GO:0019222,regulation of metabolic process|GO:0009636,response to toxic substance|GO:0048584,positive regulation of response to stimulus|GO:0048583,regulation of response to stimulus|GO:0072359,circulatory system development|GO:0072358,cardiovascular system …	GO:0005783,endoplasmic reticulum|GO:0031974,membrane-enclosed lumen|GO:0043229,intracellular organelle|GO:0043227,membrane-bounded organelle|GO:0043226,organelle|GO:0005737,cytoplasm|GO:0070062,extracellular exosome|GO:0005615,extracellular space|GO:0031988,membrane-bounded vesicle|GO:0044432,endoplasmic reticulum part|GO:0005793,endoplasmic reticulum-Golgi intermediate compartment|GO:0005788,end…	GO:0005488,binding|GO:0005515,protein binding				http://www.uniprot.org/uniprot/Q969H8	False
P09874	5.54812	2.472	P09874	PARP1	GO:0033157,regulation of intracellular protein transport|GO:0051169,nuclear transport|GO:0044238,primary metabolic process|GO:0032388,positive regulation of intracellular transport|GO:0080090,regulation of primary metabolic process|GO:0019222,regulation of metabolic process|GO:0060249,anatomical structure homeostasis|GO:0006471,protein ADP-ribosylation|GO:0051049,regulation of transport|GO:003238…	GO:0016020,membrane|GO:0031974,membrane-enclosed lumen|GO:0031975,envelope|GO:0043229,intracellular organelle|GO:0043228,non-membrane-bounded organelle|GO:0043227,membrane-bounded organelle|GO:0043226,organelle|GO:0005737,cytoplasm|GO:0031981,nuclear lumen|GO:0005730,nucleolus|GO:0005634,nucleus|GO:0005635,nuclear envelope|GO:0005739,mitochondrion|GO:0005654,nucleoplasm|GO:0031967,organelle envel…	GO:0019901,protein kinase binding|GO:0051287,NAD binding|GO:0019899,enzyme binding|GO:0044877,macromolecular complex binding|GO:0008270,zinc ion binding|GO:0003676,nucleic acid binding|GO:0003677,DNA binding|GO:0003950,NAD+ ADP-ribosyltransferase activity|GO:0000166,nucleotide binding|GO:1901363,heterocyclic compound binding|GO:1901265,nucleoside phosphate binding|GO:0043169,cation binding|GO:004…	hsa04210,Apoptosis|hsa03410,Base excision repair|hsa04064,NF-kappa B signaling pathway|hsa04217,Necroptosis		D09692,Veliparib (USAN/INN)|D09730,Olaparib (JAN/INN)|D09913,Iniparib (USAN/INN)|D10079,Rucaparib (USAN)|D10140,Niraparib (USAN)|D10157,Rucaparib phosphate (USAN)|D10732,Talazoparib (USAN/INN)|D10733,Talazoparib tosylate (USAN)	http://www.uniprot.org/uniprot/P09874	False
B3KNU0	5.54812	2.472	B3KNU0	B3KNU0							http://www.uniprot.org/uniprot/B3KNU0	False
Q7Z4W1	5.5098	2.462	Q7Z4W1	DCXR	GO:0019321,pentose metabolic process|GO:0006739,NADP metabolic process|GO:0051289,protein homotetramerization|GO:0043933,macromolecular complex subunit organization|GO:0006733,oxidoreduction coenzyme metabolic process|GO:0006807,nitrogen compound metabolic process|GO:0034641,cellular nitrogen compound metabolic process|GO:0022607,cellular component assembly|GO:1901360,organic cyclic compound meta…	GO:0043229,intracellular organelle|GO:0043228,non-membrane-bounded organelle|GO:0005874,microtubule|GO:0043226,organelle|GO:0005856,cytoskeleton|GO:0042995,cell projection|GO:0031982,vesicle|GO:0043227,membrane-bounded organelle|GO:0005634,nucleus|GO:0016020,membrane|GO:0031988,membrane-bounded vesicle|GO:0044430,cytoskeletal part|GO:0005576,extracellular region|GO:0005737,cytoplasm|GO:0015630,mi…	GO:0016614,oxidoreductase activity, acting on CH-OH group of donors|GO:0016616,oxidoreductase activity, acting on the CH-OH group of donors, NAD or NADP as acceptor|GO:0003824,catalytic activity|GO:0016655,oxidoreductase activity, acting on NAD(P)H, quinone or similar compound as acceptor|GO:0050038,L-xylulose reductase (NADP+) activity|GO:0016651,oxidoreductase activity, acting on NAD(P)H|GO:001…	hsa01100,Metabolic pathways|hsa00040,Pentose and glucuronate interconversions			http://www.uniprot.org/uniprot/Q7Z4W1	False
Q8TC12	5.48313	2.455	Q8TC12	RDH11	GO:0009628,response to abiotic stimulus|GO:0071482,cellular response to light stimulus|GO:0009314,response to radiation|GO:0048583,regulation of response to stimulus|GO:0023052,signaling|GO:0007165,signal transduction|GO:0023051,regulation of signaling|GO:0042572,retinol metabolic process|GO:0010646,regulation of cell communication|GO:0042574,retinal metabolic process|GO:0001523,retinoid metaboli…	GO:0005783,endoplasmic reticulum|GO:0005789,endoplasmic reticulum membrane|GO:0042175,nuclear outer membrane-endoplasmic reticulum membrane network|GO:0043229,intracellular organelle|GO:0043227,membrane-bounded organelle|GO:0043226,organelle|GO:0031224,intrinsic component of membrane|GO:0005737,cytoplasm|GO:0031090,organelle membrane|GO:0097458,neuron part|GO:0016021,integral component of membran…	GO:0004033,aldo-keto reductase (NADP) activity|GO:0008106,alcohol dehydrogenase (NADP+) activity|GO:0016614,oxidoreductase activity, acting on CH-OH group of donors|GO:0016616,oxidoreductase activity, acting on the CH-OH group of donors, NAD or NADP as acceptor|GO:0052650,NADP-retinol dehydrogenase activity|GO:0003824,catalytic activity|GO:0004745,retinol dehydrogenase activity|GO:0016491,oxidore…	hsa00830,Retinol metabolism|hsa01100,Metabolic pathways			http://www.uniprot.org/uniprot/Q8TC12	False
Q99729	5.41139	2.436	Q99729	HNRNPAB	GO:0080090,regulation of primary metabolic process|GO:0019222,regulation of metabolic process|GO:0048468,cell development|GO:1901362,organic cyclic compound biosynthetic process|GO:0071840,cellular component organization or biogenesis|GO:0048863,stem cell differentiation|GO:0048864,stem cell development|GO:0010604,positive regulation of macromolecule metabolic process|GO:0048869,cellular developm…	GO:0031974,membrane-enclosed lumen|GO:0043229,intracellular organelle|GO:0043227,membrane-bounded organelle|GO:0043226,organelle|GO:0005737,cytoplasm|GO:0031981,nuclear lumen|GO:0005634,nucleus|GO:0030529,intracellular ribonucleoprotein complex|GO:0005654,nucleoplasm|GO:0044798,nuclear transcription factor complex|GO:0043234,protein complex|GO:0032991,macromolecular complex|GO:0043231,intracellul…	GO:0005488,binding|GO:0043565,sequence-specific DNA binding|GO:0003700,transcription factor activity, sequence-specific DNA binding|GO:0097159,organic cyclic compound binding|GO:0044822,poly(A) RNA binding|GO:0001071,nucleic acid binding transcription factor activity|GO:0000166,nucleotide binding|GO:0036094,small molecule binding|GO:0003723,RNA binding|GO:0003676,nucleic acid binding|GO:0003677,D…				http://www.uniprot.org/uniprot/Q99729	False
P12236	5.3852	2.429	P12236	SLC25A6	GO:0090087,regulation of peptide transport|GO:0008104,protein localization|GO:0052553,modulation by symbiont of host immune response|GO:0052552,modulation by organism of immune response of other organism involved in symbiotic interaction|GO:0051046,regulation of secretion|GO:0051049,regulation of transport|GO:0048584,positive regulation of response to stimulus|GO:0048583,regulation of response to…	GO:0044464,cell part|GO:0031975,envelope|GO:0043229,intracellular organelle|GO:0043227,membrane-bounded organelle|GO:0043226,organelle|GO:0031224,intrinsic component of membrane|GO:0005737,cytoplasm|GO:0031090,organelle membrane|GO:0005743,mitochondrial inner membrane|GO:0016021,integral component of membrane|GO:0016020,membrane|GO:0044444,cytoplasmic part|GO:0005739,mitochondrion|GO:0098800,inne…	GO:0005346,purine ribonucleotide transmembrane transporter activity|GO:0005347,ATP transmembrane transporter activity|GO:0015932,nucleobase-containing compound transmembrane transporter activity|GO:0015605,organophosphate ester transmembrane transporter activity|GO:0005488,binding|GO:0015291,secondary active transmembrane transporter activity|GO:0015215,nucleotide transmembrane transporter activi…	hsa04022,cGMP-PKG signaling pathway|hsa04020,Calcium signaling pathway|hsa04218,Cellular senescence|hsa04217,Necroptosis|hsa05164,Influenza A|hsa05016,Huntington disease|hsa05166,Human T-cell leukemia virus 1 infection|hsa05012,Parkinson disease			http://www.uniprot.org/uniprot/P12236	False
Q9P0M6	5.3295	2.414	Q9P0M6	H2AFY2	GO:0008104,protein localization|GO:0080090,regulation of primary metabolic process|GO:0019222,regulation of metabolic process|GO:0060322,head development|GO:1901362,organic cyclic compound biosynthetic process|GO:0071840,cellular component organization or biogenesis|GO:0010605,negative regulation of macromolecule metabolic process|GO:0071704,organic substance metabolic process|GO:0048869,cellular…	GO:0031974,membrane-enclosed lumen|GO:0044815,DNA packaging complex|GO:0043229,intracellular organelle|GO:0043228,non-membrane-bounded organelle|GO:0000785,chromatin|GO:0005623,cell|GO:0000786,nucleosome|GO:0000228,nuclear chromosome|GO:0043227,membrane-bounded organelle|GO:0043226,organelle|GO:0001740,Barr body|GO:0070062,extracellular exosome|GO:0031981,nuclear lumen|GO:0005634,nucleus|GO:00008…	GO:0044212,transcription regulatory region DNA binding|GO:0043566,structure-specific DNA binding|GO:0046982,protein heterodimerization activity|GO:0005515,protein binding|GO:0043565,sequence-specific DNA binding|GO:0001067,regulatory region nucleic acid binding|GO:0003677,DNA binding|GO:0001012,RNA polymerase II regulatory region DNA binding|GO:0031490,chromatin DNA binding|GO:0044877,macromolecu…	hsa05322,Systemic lupus erythematosus|hsa05034,Alcoholism|hsa04217,Necroptosis			http://www.uniprot.org/uniprot/Q9P0M6	False
P31943	5.30738	2.408	P31943	HNRNPH1	GO:0080090,regulation of primary metabolic process|GO:0019222,regulation of metabolic process|GO:0031323,regulation of cellular metabolic process|GO:0090304,nucleic acid metabolic process|GO:0034641,cellular nitrogen compound metabolic process|GO:0006807,nitrogen compound metabolic process|GO:0044237,cellular metabolic process|GO:0043170,macromolecule metabolic process|GO:0050789,regulation of bi…	GO:0031974,membrane-enclosed lumen|GO:0043229,intracellular organelle|GO:0043227,membrane-bounded organelle|GO:0043226,organelle|GO:0031981,nuclear lumen|GO:0005634,nucleus|GO:0016020,membrane|GO:0030529,intracellular ribonucleoprotein complex|GO:0005654,nucleoplasm|GO:0071013,catalytic step 2 spliceosome|GO:0032991,macromolecular complex|GO:0043231,intracellular membrane-bounded organelle|GO:004…	GO:0036094,small molecule binding|GO:0005515,protein binding|GO:0097159,organic cyclic compound binding|GO:0044822,poly(A) RNA binding|GO:0000166,nucleotide binding|GO:0008266,poly(U) RNA binding|GO:0003727,single-stranded RNA binding|GO:0003723,RNA binding|GO:0003676,nucleic acid binding|GO:0008187,poly-pyrimidine tract binding|GO:1901363,heterocyclic compound binding|GO:1901265,nucleoside phosp…				http://www.uniprot.org/uniprot/P31943	False
Q9Y230	5.27803	2.4	Q9Y230	RUVBL2	GO:0008104,protein localization|GO:0035065,regulation of histone acetylation|GO:0035066,positive regulation of histone acetylation|GO:0090579,dsDNA loop formation|GO:0006475,internal protein amino acid acetylation|GO:0031056,regulation of histone modification|GO:0031058,positive regulation of histone modification|GO:1901362,organic cyclic compound biosynthetic process|GO:0071840,cellular componen…	GO:0043231,intracellular membrane-bounded organelle|GO:0033202,DNA helicase complex|GO:0016020,membrane|GO:0031011,Ino80 complex|GO:0031974,membrane-enclosed lumen|GO:0043229,intracellular organelle|GO:0043228,non-membrane-bounded organelle|GO:0000785,chromatin|GO:0035267,NuA4 histone acetyltransferase complex|GO:0032991,macromolecular complex|GO:1902562,H4 histone acetyltransferase complex|GO:00…	GO:0017076,purine nucleotide binding|GO:0003676,nucleic acid binding|GO:0008026,ATP-dependent helicase activity|GO:0035639,purine ribonucleoside triphosphate binding|GO:0001012,RNA polymerase II regulatory region DNA binding|GO:0001158,enhancer sequence-specific DNA binding|GO:0031490,chromatin DNA binding|GO:0044877,macromolecular complex binding|GO:0005488,binding|GO:0016887,ATPase activity|GO:…				http://www.uniprot.org/uniprot/Q9Y230	False
Q9Y2B0	5.21259	2.382	Q9Y2B0	CNPY2	GO:0009892,negative regulation of metabolic process|GO:0009893,positive regulation of metabolic process|GO:0019222,regulation of metabolic process|GO:0009891,positive regulation of biosynthetic process|GO:0031325,positive regulation of cellular metabolic process|GO:0031323,regulation of cellular metabolic process|GO:0010869,regulation of receptor biosynthetic process|GO:0010629,negative regulatio…	GO:0005783,endoplasmic reticulum|GO:0043229,intracellular organelle|GO:0071944,cell periphery|GO:0031226,intrinsic component of plasma membrane|GO:0043226,organelle|GO:0031224,intrinsic component of membrane|GO:0005737,cytoplasm|GO:0043227,membrane-bounded organelle|GO:0016021,integral component of membrane|GO:0016020,membrane|GO:0044459,plasma membrane part|GO:0012505,endomembrane system|GO:0005…	GO:0005488,binding|GO:0005515,protein binding				http://www.uniprot.org/uniprot/Q9Y2B0	False
O43175	5.16583	2.369	O43175	PHGDH	GO:0019222,regulation of metabolic process|GO:0048468,cell development|GO:0021510,spinal cord development|GO:0060322,head development|GO:0044281,small molecule metabolic process|GO:0044283,small molecule biosynthetic process|GO:0071840,cellular component organization or biogenesis|GO:0044710,single-organism metabolic process|GO:0044711,single-organism biosynthetic process|GO:0006544,glycine metab…	GO:0005737,cytoplasm|GO:0005622,intracellular|GO:0043230,extracellular organelle|GO:0031982,vesicle|GO:0043209,myelin sheath|GO:0043227,membrane-bounded organelle|GO:0005829,cytosol|GO:0044464,cell part|GO:0005623,cell|GO:0031988,membrane-bounded vesicle|GO:0044421,extracellular region part|GO:0044444,cytoplasmic part|GO:0005576,extracellular region|GO:0044424,intracellular part|GO:1903561,extrac…	GO:0050662,coenzyme binding|GO:0016614,oxidoreductase activity, acting on CH-OH group of donors|GO:0016616,oxidoreductase activity, acting on the CH-OH group of donors, NAD or NADP as acceptor|GO:0051287,NAD binding|GO:0000166,nucleotide binding|GO:0036094,small molecule binding|GO:0003824,catalytic activity|GO:0004617,phosphoglycerate dehydrogenase activity|GO:0005488,binding|GO:0097159,organic …	hsa00260,Glycine, serine and threonine metabolism|hsa01200,Carbon metabolism|hsa01100,Metabolic pathways|hsa00270,Cysteine and methionine metabolism|hsa01230,Biosynthesis of amino acids			http://www.uniprot.org/uniprot/O43175	False
Q99958	5.16583	2.369	Q99958	FOXC2	GO:0001501,skeletal system development|GO:0001503,ossification|GO:0003151,outflow tract morphogenesis|GO:0014033,neural crest cell differentiation|GO:0051716,cellular response to stimulus|GO:0014031,mesenchymal cell development|GO:0048589,developmental growth|GO:0003158,endothelium development|GO:0030855,epithelial cell differentiation|GO:0060548,negative regulation of cell death|GO:0006366,trans…	GO:0043231,intracellular membrane-bounded organelle|GO:0005634,nucleus|GO:0044464,cell part|GO:0005623,cell|GO:0005622,intracellular|GO:0043229,intracellular organelle|GO:0044424,intracellular part|GO:0043227,membrane-bounded organelle|GO:0043226,organelle|GO:0044446,intracellular organelle part|GO:0016604,nuclear body|GO:0031981,nuclear lumen|GO:0043233,organelle lumen|GO:0031974,membrane-enclos…	GO:0003705,transcription factor activity, RNA polymerase II distal enhancer sequence-specific binding|GO:0031490,chromatin DNA binding|GO:0001077,transcriptional activator activity, RNA polymerase II core promoter proximal region sequence-specific binding|GO:0044877,macromolecular complex binding|GO:0001071,nucleic acid binding transcription factor activity|GO:0003676,nucleic acid binding|GO:0003…				http://www.uniprot.org/uniprot/Q99958	True
P42166	5.14083	2.362	P42166	TMPO	GO:0080090,regulation of primary metabolic process|GO:0019222,regulation of metabolic process|GO:0031326,regulation of cellular biosynthetic process|GO:0031323,regulation of cellular metabolic process|GO:0090304,nucleic acid metabolic process|GO:0044249,cellular biosynthetic process|GO:0034641,cellular nitrogen compound metabolic process|GO:0006807,nitrogen compound metabolic process|GO:0034645,c…	GO:0005635,nuclear envelope|GO:0044464,cell part|GO:0031975,envelope|GO:0043229,intracellular organelle|GO:0043228,non-membrane-bounded organelle|GO:0000785,chromatin|GO:0043227,membrane-bounded organelle|GO:0043226,organelle|GO:0031090,organelle membrane|GO:0005637,nuclear inner membrane|GO:0005634,nucleus|GO:0016020,membrane|GO:0005694,chromosome|GO:0031965,nuclear membrane|GO:0031967,organelle…	GO:0003676,nucleic acid binding|GO:0097159,organic cyclic compound binding|GO:0005488,binding|GO:0005515,protein binding|GO:0003677,DNA binding|GO:0005521,lamin binding|GO:1901363,heterocyclic compound binding|GO:0045296,cadherin binding|GO:0050839,cell adhesion molecule binding				http://www.uniprot.org/uniprot/P42166	False
P07741	5.11594	2.355	P07741	APRT	GO:0007595,lactation|GO:0007610,behavior|GO:0009167,purine ribonucleoside monophosphate metabolic process|GO:0009165,nucleotide biosynthetic process|GO:0009163,nucleoside biosynthetic process|GO:0009161,ribonucleoside monophosphate metabolic process|GO:1901362,organic cyclic compound biosynthetic process|GO:0042451,purine nucleoside biosynthetic process|GO:0009168,purine ribonucleoside monophosph…	GO:0031974,membrane-enclosed lumen|GO:0043229,intracellular organelle|GO:0043227,membrane-bounded organelle|GO:0043226,organelle|GO:0005737,cytoplasm|GO:0070062,extracellular exosome|GO:0031981,nuclear lumen|GO:0005634,nucleus|GO:0031988,membrane-bounded vesicle|GO:0005654,nucleoplasm|GO:1903561,extracellular vesicle|GO:0031982,vesicle|GO:0043230,extracellular organelle|GO:0043231,intracellular m…	GO:0005488,binding|GO:0043167,ion binding|GO:1901363,heterocyclic compound binding|GO:1901265,nucleoside phosphate binding|GO:0001882,nucleoside binding|GO:0043168,anion binding|GO:0043169,cation binding|GO:0016763,transferase activity, transferring pentosyl groups|GO:0000166,nucleotide binding|GO:0016740,transferase activity|GO:0001883,purine nucleoside binding|GO:0032549,ribonucleoside binding|…	hsa01100,Metabolic pathways|hsa00230,Purine metabolism			http://www.uniprot.org/uniprot/P07741	False
P48637	5.10178	2.351	P48637	GSS	GO:0009991,response to extracellular stimulus|GO:0044707,single-multicellular organism process|GO:0010038,response to metal ion|GO:0042398,cellular modified amino acid biosynthetic process|GO:0050896,response to stimulus|GO:0019752,carboxylic acid metabolic process|GO:1901564,organonitrogen compound metabolic process|GO:0006805,xenobiotic metabolic process|GO:0034641,cellular nitrogen compound me…	GO:0005737,cytoplasm|GO:0005622,intracellular|GO:0043230,extracellular organelle|GO:0031982,vesicle|GO:0044421,extracellular region part|GO:0043227,membrane-bounded organelle|GO:0005829,cytosol|GO:0044464,cell part|GO:0005623,cell|GO:0031988,membrane-bounded vesicle|GO:0044444,cytoplasmic part|GO:0005576,extracellular region|GO:0044424,intracellular part|GO:1903561,extracellular vesicle|GO:006501…	GO:0035639,purine ribonucleoside triphosphate binding|GO:0016881,acid-amino acid ligase activity|GO:0005488,binding|GO:0043167,ion binding|GO:0016597,amino acid binding|GO:1901363,heterocyclic compound binding|GO:1901265,nucleoside phosphate binding|GO:0001882,nucleoside binding|GO:1901681,sulfur compound binding|GO:0043169,cation binding|GO:0004363,glutathione synthase activity|GO:0000287,magnes…	hsa01100,Metabolic pathways|hsa00270,Cysteine and methionine metabolism|hsa00480,Glutathione metabolism|hsa04216,Ferroptosis			http://www.uniprot.org/uniprot/P48637	False
P49458	5.08413	2.346	P49458	SRP9	GO:0008104,protein localization|GO:0045900,negative regulation of translational elongation|GO:0080090,regulation of primary metabolic process|GO:0019222,regulation of metabolic process|GO:0061024,membrane organization|GO:0071840,cellular component organization or biogenesis|GO:0010605,negative regulation of macromolecule metabolic process|GO:0070727,cellular macromolecule localization|GO:0010608,…	GO:0005786,signal recognition particle, endoplasmic reticulum targeting|GO:0005785,signal recognition particle receptor complex|GO:0005783,endoplasmic reticulum|GO:0044464,cell part|GO:0005789,endoplasmic reticulum membrane|GO:0042175,nuclear outer membrane-endoplasmic reticulum membrane network|GO:0043229,intracellular organelle|GO:0030529,intracellular ribonucleoprotein complex|GO:0043227,membr…	GO:0097159,organic cyclic compound binding|GO:0005047,signal recognition particle binding|GO:0008312,7S RNA binding|GO:0003723,RNA binding|GO:0003676,nucleic acid binding|GO:0043021,ribonucleoprotein complex binding|GO:0044877,macromolecular complex binding|GO:1901363,heterocyclic compound binding|GO:0005488,binding|GO:0005515,protein binding	hsa03060,Protein export			http://www.uniprot.org/uniprot/P49458	False
Q9H9B4	5.05251	2.337	Q9H9B4	SFXN1	GO:0050801,ion homeostasis|GO:0030154,cell differentiation|GO:0042592,homeostatic process|GO:0098771,inorganic ion homeostasis|GO:0055072,iron ion homeostasis|GO:0006826,iron ion transport|GO:0055076,transition metal ion homeostasis|GO:0030001,metal ion transport|GO:0007275,multicellular organism development|GO:0044699,single-organism process|GO:0048869,cellular developmental process|GO:0002262,m…	GO:0044464,cell part|GO:0031975,envelope|GO:0043229,intracellular organelle|GO:0043227,membrane-bounded organelle|GO:0043226,organelle|GO:0031224,intrinsic component of membrane|GO:0005737,cytoplasm|GO:0031090,organelle membrane|GO:0016021,integral component of membrane|GO:0016020,membrane|GO:0044444,cytoplasmic part|GO:0005739,mitochondrion|GO:0031967,organelle envelope|GO:0031966,mitochondrial …	GO:0022891,substrate-specific transmembrane transporter activity|GO:0022892,substrate-specific transporter activity|GO:0005215,transporter activity|GO:0015075,ion transmembrane transporter activity|GO:0022857,transmembrane transporter activity|GO:0008324,cation transmembrane transporter activity|GO:0005342,organic acid transmembrane transporter activity|GO:0015318,inorganic solute uptake transmem…				http://www.uniprot.org/uniprot/Q9H9B4	False
Q00839	5.00372	2.323	Q00839	HNRNPU	GO:0032922,circadian regulation of gene expression|GO:0008152,metabolic process|GO:0019222,regulation of metabolic process|GO:0071704,organic substance metabolic process|GO:0030154,cell differentiation|GO:0090304,nucleic acid metabolic process|GO:0034641,cellular nitrogen compound metabolic process|GO:0001503,ossification|GO:0044237,cellular metabolic process|GO:0070934,CRD-mediated mRNA stabiliz…	GO:0035770,ribonucleoprotein granule|GO:0031974,membrane-enclosed lumen|GO:0043229,intracellular organelle|GO:0043228,non-membrane-bounded organelle|GO:0036464,cytoplasmic ribonucleoprotein granule|GO:0070937,CRD-mediated mRNA stability complex|GO:0043227,membrane-bounded organelle|GO:0043226,organelle|GO:0005737,cytoplasm|GO:0031981,nuclear lumen|GO:0005634,nucleus|GO:0016020,membrane|GO:0030529…	GO:0035639,purine ribonucleoside triphosphate binding|GO:0005488,binding|GO:0003676,nucleic acid binding|GO:0003677,DNA binding|GO:0043167,ion binding|GO:1901363,heterocyclic compound binding|GO:1901265,nucleoside phosphate binding|GO:0001882,nucleoside binding|GO:0043168,anion binding|GO:0000166,nucleotide binding|GO:0001883,purine nucleoside binding|GO:0032549,ribonucleoside binding|GO:0017076,…	hsa03040,Spliceosome			http://www.uniprot.org/uniprot/Q00839	False
O60869	4.91776	2.298	O60869	EDF1	GO:0080090,regulation of primary metabolic process|GO:0019222,regulation of metabolic process|GO:1901362,organic cyclic compound biosynthetic process|GO:1901360,organic cyclic compound metabolic process|GO:0044710,single-organism metabolic process|GO:0010604,positive regulation of macromolecule metabolic process|GO:0048869,cellular developmental process|GO:0044093,positive regulation of molecular…	GO:0030880,RNA polymerase complex|GO:0044464,cell part|GO:0031974,membrane-enclosed lumen|GO:0090575,RNA polymerase II transcription factor complex|GO:0043228,non-membrane-bounded organelle|GO:0016591,DNA-directed RNA polymerase II, holoenzyme|GO:0043227,membrane-bounded organelle|GO:0043226,organelle|GO:0005737,cytoplasm|GO:0070062,extracellular exosome|GO:0031981,nuclear lumen|GO:0005730,nucleo…	GO:0004402,histone acetyltransferase activity|GO:0005488,binding|GO:0003676,nucleic acid binding|GO:0003677,DNA binding|GO:0008168,methyltransferase activity|GO:1901363,heterocyclic compound binding|GO:0043565,sequence-specific DNA binding|GO:0008080,N-acetyltransferase activity|GO:0003713,transcription coactivator activity|GO:0003712,transcription cofactor activity|GO:0016740,transferase activit…				http://www.uniprot.org/uniprot/O60869	False
Q16795	4.91094	2.296	Q16795	NDUFA9	GO:1901004,ubiquinone-6 metabolic process|GO:0051234,establishment of localization|GO:0006732,coenzyme metabolic process|GO:0009141,nucleoside triphosphate metabolic process|GO:0009161,ribonucleoside monophosphate metabolic process|GO:0009144,purine nucleoside triphosphate metabolic process|GO:0009167,purine ribonucleoside monophosphate metabolic process|GO:0034641,cellular nitrogen compound meta…	GO:0098796,membrane protein complex|GO:0044464,cell part|GO:0031974,membrane-enclosed lumen|GO:1990204,oxidoreductase complex|GO:0043229,intracellular organelle|GO:0043227,membrane-bounded organelle|GO:0043226,organelle|GO:0005737,cytoplasm|GO:0031090,organelle membrane|GO:0005743,mitochondrial inner membrane|GO:0005634,nucleus|GO:0016020,membrane|GO:0098803,respiratory chain complex|GO:0044444,c…	GO:0005488,binding|GO:0050662,coenzyme binding|GO:0003824,catalytic activity|GO:0048037,cofactor binding|GO:0008137,NADH dehydrogenase (ubiquinone) activity|GO:0016655,oxidoreductase activity, acting on NAD(P)H, quinone or similar compound as acceptor|GO:0050136,NADH dehydrogenase (quinone) activity|GO:0016651,oxidoreductase activity, acting on NAD(P)H|GO:0005515,protein binding|GO:0032403,protei…	hsa00190,Oxidative phosphorylation|hsa04714,Thermogenesis|hsa01100,Metabolic pathways|hsa04723,Retrograde endocannabinoid signaling|hsa05012,Parkinson disease|hsa05016,Huntington disease|hsa05010,Alzheimer disease|hsa04932,Non-alcoholic fatty liver disease			http://www.uniprot.org/uniprot/Q16795	False
P00505	4.8804	2.287	P00505	GOT2	GO:0006820,anion transport|GO:0044281,small molecule metabolic process|GO:0044282,small molecule catabolic process|GO:0044283,small molecule biosynthetic process|GO:1901360,organic cyclic compound metabolic process|GO:1901361,organic cyclic compound catabolic process|GO:0044712,single-organism catabolic process|GO:0044710,single-organism metabolic process|GO:0044711,single-organism biosynthetic p…	GO:0044464,cell part|GO:0031974,membrane-enclosed lumen|GO:0031975,envelope|GO:0043229,intracellular organelle|GO:0071944,cell periphery|GO:0043227,membrane-bounded organelle|GO:0043226,organelle|GO:0005737,cytoplasm|GO:0031090,organelle membrane|GO:0005743,mitochondrial inner membrane|GO:0043209,myelin sheath|GO:0016020,membrane|GO:0044444,cytoplasmic part|GO:0005739,mitochondrion|GO:0031988,mem…	GO:0005488,binding|GO:0016212,kynurenine-oxoglutarate transaminase activity|GO:0008483,transaminase activity|GO:0080130,L-phenylalanine:2-oxoglutarate aminotransferase activity|GO:0003676,nucleic acid binding|GO:0016597,amino acid binding|GO:1901363,heterocyclic compound binding|GO:0043168,anion binding|GO:0005543,phospholipid binding|GO:0043167,ion binding|GO:0004069,L-aspartate:2-oxoglutarate a…	hsa04975,Fat digestion and absorption|hsa00330,Arginine and proline metabolism|hsa01200,Carbon metabolism|hsa00400,Phenylalanine, tyrosine and tryptophan biosynthesis|hsa01100,Metabolic pathways|hsa00250,Alanine, aspartate and glutamate metabolism|hsa00220,Arginine biosynthesis|hsa00360,Phenylalanine metabolism|hsa01230,Biosynthesis of amino acids|hsa00270,Cysteine and methionine metabolism|hsa00…			http://www.uniprot.org/uniprot/P00505	False
Q99873	4.84333	2.276	Q99873	PRMT1	GO:0006479,protein methylation|GO:0019220,regulation of phosphate metabolic process|GO:0080090,regulation of primary metabolic process|GO:0019222,regulation of metabolic process|GO:0048584,positive regulation of response to stimulus|GO:0048583,regulation of response to stimulus|GO:0032846,positive regulation of homeostatic process|GO:0032844,regulation of homeostatic process|GO:0007165,signal tra…	GO:0005737,cytoplasm|GO:0044446,intracellular organelle part|GO:0005829,cytosol|GO:0043231,intracellular membrane-bounded organelle|GO:0031981,nuclear lumen|GO:0043233,organelle lumen|GO:0005634,nucleus|GO:0044464,cell part|GO:0044444,cytoplasmic part|GO:0031974,membrane-enclosed lumen|GO:0005622,intracellular|GO:0005654,nucleoplasm|GO:0070013,intracellular organelle lumen|GO:0043229,intracellula…	GO:0016274,protein-arginine N-methyltransferase activity|GO:0042054,histone methyltransferase activity|GO:0016273,arginine N-methyltransferase activity|GO:0019899,enzyme binding|GO:0008469,histone-arginine N-methyltransferase activity|GO:0008276,protein methyltransferase activity|GO:0005488,binding|GO:0035242,protein-arginine omega-N asymmetric methyltransferase activity|GO:0008168,methyltransfer…	hsa04922,Glucagon signaling pathway|hsa04068,FoxO signaling pathway			http://www.uniprot.org/uniprot/Q99873	False
B3KTA3	4.80654	2.265	B3KTA3	B3KTA3	GO:0006996,organelle organization|GO:0007015,actin filament organization|GO:0044699,single-organism process|GO:0007010,cytoskeleton organization|GO:0040011,locomotion|GO:0030029,actin filament-based process|GO:0048870,cell motility|GO:0097435,fibril organization|GO:0009987,cellular process|GO:0030036,actin cytoskeleton organization|GO:0006928,movement of cell or subcellular component|GO:1902589,s…	GO:0005856,cytoskeleton|GO:0005737,cytoplasm|GO:0043232,intracellular non-membrane-bounded organelle|GO:0044464,cell part|GO:0005623,cell|GO:0005622,intracellular|GO:0043229,intracellular organelle|GO:0043228,non-membrane-bounded organelle|GO:0044424,intracellular part|GO:0043226,organelle	GO:0030674,protein binding, bridging|GO:0008092,cytoskeletal protein binding|GO:0051015,actin filament binding|GO:0003779,actin binding|GO:0044877,macromolecular complex binding|GO:0005488,binding|GO:0005515,protein binding|GO:0032403,protein complex binding|GO:0060090,binding, bridging				http://www.uniprot.org/uniprot/B3KTA3	False
Q09028	4.74037	2.245	Q09028	RBBP4	GO:0080090,regulation of primary metabolic process|GO:0019222,regulation of metabolic process|GO:0000086,G2/M transition of mitotic cell cycle|GO:0031055,chromatin remodeling at centromere|GO:1901362,organic cyclic compound biosynthetic process|GO:0071840,cellular component organization or biogenesis|GO:0010605,negative regulation of macromolecule metabolic process|GO:0043044,ATP-dependent chroma…	GO:0031010,ISWI-type complex|GO:0031974,membrane-enclosed lumen|GO:0043229,intracellular organelle|GO:0043228,non-membrane-bounded organelle|GO:0000785,chromatin|GO:0005623,cell|GO:0000228,nuclear chromosome|GO:0043227,membrane-bounded organelle|GO:0043226,organelle|GO:0034708,methyltransferase complex|GO:0070822,Sin3-type complex|GO:0070603,SWI/SNF superfamily-type complex|GO:0031519,PcG protein…	GO:0019899,enzyme binding|GO:0042393,histone binding|GO:0003676,nucleic acid binding|GO:0001012,RNA polymerase II regulatory region DNA binding|GO:0001159,core promoter proximal region DNA binding|GO:0001158,enhancer sequence-specific DNA binding|GO:0031491,nucleosome binding|GO:0031490,chromatin DNA binding|GO:0031492,nucleosomal DNA binding|GO:0044877,macromolecular complex binding|GO:0005488,b…	hsa04218,Cellular senescence			http://www.uniprot.org/uniprot/Q09028	False
P07910	4.71089	2.236	P07910	HNRNPC	GO:0008152,metabolic process|GO:0019222,regulation of metabolic process|GO:0043933,macromolecular complex subunit organization|GO:0030154,cell differentiation|GO:0090304,nucleic acid metabolic process|GO:0034641,cellular nitrogen compound metabolic process|GO:0001503,ossification|GO:1901360,organic cyclic compound metabolic process|GO:0044237,cellular metabolic process|GO:0070935,3'-UTR-mediated …	GO:0031974,membrane-enclosed lumen|GO:0043229,intracellular organelle|GO:0043228,non-membrane-bounded organelle|GO:0000785,chromatin|GO:0000228,nuclear chromosome|GO:0030529,intracellular ribonucleoprotein complex|GO:0043227,membrane-bounded organelle|GO:0043226,organelle|GO:0005737,cytoplasm|GO:0070062,extracellular exosome|GO:0031981,nuclear lumen|GO:0005634,nucleus|GO:0016020,membrane|GO:00319…	GO:1990247,N6-methyladenosine-containing RNA binding|GO:0001012,RNA polymerase II regulatory region DNA binding|GO:0001159,core promoter proximal region DNA binding|GO:0001158,enhancer sequence-specific DNA binding|GO:0031491,nucleosome binding|GO:0031490,chromatin DNA binding|GO:0031492,nucleosomal DNA binding|GO:0044877,macromolecular complex binding|GO:0005488,binding|GO:0003676,nucleic acid b…	hsa03040,Spliceosome			http://www.uniprot.org/uniprot/P07910	False
Q15717	4.68159	2.227	Q15717	ELAVL1	GO:2000736,regulation of stem cell differentiation|GO:0080090,regulation of primary metabolic process|GO:0019222,regulation of metabolic process|GO:0048468,cell development|GO:0070935,3'-UTR-mediated mRNA stabilization|GO:0048863,stem cell differentiation|GO:0048864,stem cell development|GO:0010604,positive regulation of macromolecule metabolic process|GO:0010608,posttranscriptional regulation of…	GO:0031974,membrane-enclosed lumen|GO:0043229,intracellular organelle|GO:0043227,membrane-bounded organelle|GO:0043226,organelle|GO:0005737,cytoplasm|GO:0031981,nuclear lumen|GO:0005634,nucleus|GO:0016020,membrane|GO:0005654,nucleoplasm|GO:0043231,intracellular membrane-bounded organelle|GO:0043233,organelle lumen|GO:0005829,cytosol|GO:0044464,cell part|GO:0005623,cell|GO:0005622,intracellular|GO…	GO:0005488,binding|GO:0036094,small molecule binding|GO:0005515,protein binding|GO:0019901,protein kinase binding|GO:0097159,organic cyclic compound binding|GO:0044822,poly(A) RNA binding|GO:0019899,enzyme binding|GO:0000166,nucleotide binding|GO:0017091,AU-rich element binding|GO:0019900,kinase binding|GO:0003725,double-stranded RNA binding|GO:0003730,mRNA 3'-UTR binding|GO:0003676,nucleic acid …	hsa04152,AMPK signaling pathway|hsa04657,IL-17 signaling pathway			http://www.uniprot.org/uniprot/Q15717	False
Q13263	4.6396	2.214	Q13263	TRIM28	GO:0033157,regulation of intracellular protein transport|GO:0051169,nuclear transport|GO:0008104,protein localization|GO:0032388,positive regulation of intracellular transport|GO:0080090,regulation of primary metabolic process|GO:0019222,regulation of metabolic process|GO:0051049,regulation of transport|GO:0032386,regulation of intracellular transport|GO:0048584,positive regulation of response to…	GO:0031974,membrane-enclosed lumen|GO:0090575,RNA polymerase II transcription factor complex|GO:0043228,non-membrane-bounded organelle|GO:0000785,chromatin|GO:0000228,nuclear chromosome|GO:0043227,membrane-bounded organelle|GO:0043226,organelle|GO:0005719,nuclear euchromatin|GO:0031981,nuclear lumen|GO:0005634,nucleus|GO:0005654,nucleoplasm|GO:0044454,nuclear chromosome part|GO:0044798,nuclear tr…	GO:0044389,ubiquitin-like protein ligase binding|GO:0019899,enzyme binding|GO:0008270,zinc ion binding|GO:0003676,nucleic acid binding|GO:0003677,DNA binding|GO:1901363,heterocyclic compound binding|GO:0019787,ubiquitin-like protein transferase activity|GO:0043565,sequence-specific DNA binding|GO:0046914,transition metal ion binding|GO:0004842,ubiquitin-protein transferase activity|GO:0003714,tra…				http://www.uniprot.org/uniprot/Q13263	False
Q13151	4.62996	2.211	Q13151	HNRNPA0	GO:0006954,inflammatory response|GO:0008152,metabolic process|GO:0019222,regulation of metabolic process|GO:0090304,nucleic acid metabolic process|GO:0034641,cellular nitrogen compound metabolic process|GO:0006807,nitrogen compound metabolic process|GO:0044237,cellular metabolic process|GO:0070935,3'-UTR-mediated mRNA stabilization|GO:0032496,response to lipopolysaccharide|GO:0043170,macromolecul…	GO:0044446,intracellular organelle part|GO:0032991,macromolecular complex|GO:0043231,intracellular membrane-bounded organelle|GO:0031981,nuclear lumen|GO:0043233,organelle lumen|GO:0005634,nucleus|GO:0044464,cell part|GO:0031974,membrane-enclosed lumen|GO:0030529,intracellular ribonucleoprotein complex|GO:0005654,nucleoplasm|GO:0070013,intracellular organelle lumen|GO:0043229,intracellular organe…	GO:0036094,small molecule binding|GO:0005515,protein binding|GO:0019901,protein kinase binding|GO:0097159,organic cyclic compound binding|GO:0044822,poly(A) RNA binding|GO:0019899,enzyme binding|GO:0000166,nucleotide binding|GO:0017091,AU-rich element binding|GO:0019900,kinase binding|GO:0003723,RNA binding|GO:0003676,nucleic acid binding|GO:1901363,heterocyclic compound binding|GO:1901265,nucleo…				http://www.uniprot.org/uniprot/Q13151	False
Q02252	4.62355	2.209	Q02252	ALDH6A1	GO:0030154,cell differentiation|GO:0019752,carboxylic acid metabolic process|GO:0009063,cellular amino acid catabolic process|GO:0072529,pyrimidine-containing compound catabolic process|GO:0034641,cellular nitrogen compound metabolic process|GO:0006807,nitrogen compound metabolic process|GO:1901360,organic cyclic compound metabolic process|GO:0044281,small molecule metabolic process|GO:0044282,sm…	GO:0031974,membrane-enclosed lumen|GO:0043229,intracellular organelle|GO:0043227,membrane-bounded organelle|GO:0043226,organelle|GO:0005737,cytoplasm|GO:0070062,extracellular exosome|GO:0031981,nuclear lumen|GO:0005634,nucleus|GO:0005739,mitochondrion|GO:0031988,membrane-bounded vesicle|GO:0005654,nucleoplasm|GO:0005759,mitochondrial matrix|GO:1903561,extracellular vesicle|GO:0031982,vesicle|GO:0…	GO:0004491,methylmalonate-semialdehyde dehydrogenase (acylating) activity|GO:0016790,thiolester hydrolase activity|GO:0005488,binding|GO:0003676,nucleic acid binding|GO:1901363,heterocyclic compound binding|GO:0016491,oxidoreductase activity|GO:1901681,sulfur compound binding|GO:0050662,coenzyme binding|GO:0016620,oxidoreductase activity, acting on the aldehyde or oxo group of donors, NAD or NADP…	hsa00562,Inositol phosphate metabolism|hsa01100,Metabolic pathways|hsa01200,Carbon metabolism|hsa00280,Valine, leucine and isoleucine degradation|hsa00640,Propanoate metabolism|hsa00410,beta-Alanine metabolism			http://www.uniprot.org/uniprot/Q02252	False
P17612	4.58843	2.198	P17612	PRKACA	GO:0033157,regulation of intracellular protein transport|GO:0051169,nuclear transport|GO:0051168,nuclear export|GO:0007599,hemostasis|GO:0051046,regulation of secretion|GO:0051049,regulation of transport|GO:0007596,blood coagulation|GO:0001503,ossification|GO:0044281,small molecule metabolic process|GO:0034199,activation of protein kinase A activity|GO:0098771,inorganic ion homeostasis|GO:0032388…	GO:0044463,cell projection part|GO:0098590,plasma membrane region|GO:1902911,protein kinase complex|GO:0016021,integral component of membrane|GO:0044421,extracellular region part|GO:0031974,membrane-enclosed lumen|GO:0031594,neuromuscular junction|GO:0043229,intracellular organelle|GO:0043228,non-membrane-bounded organelle|GO:0034702,ion channel complex|GO:0045202,synapse|GO:0005929,cilium|GO:004…	GO:0005488,binding|GO:0044389,ubiquitin-like protein ligase binding|GO:0035639,purine ribonucleoside triphosphate binding|GO:0019899,enzyme binding|GO:0044877,macromolecular complex binding|GO:0004672,protein kinase activity|GO:0004691,cAMP-dependent protein kinase activity|GO:0004690,cyclic nucleotide-dependent protein kinase activity|GO:1901363,heterocyclic compound binding|GO:0001883,purine nu…	hsa05414,Dilated cardiomyopathy|hsa04340,Hedgehog signaling pathway|hsa04611,Platelet activation|hsa04020,Calcium signaling pathway|hsa04740,Olfactory transduction|hsa04024,cAMP signaling pathway|hsa04530,Tight junction|hsa04140,Autophagy - animal|hsa04723,Retrograde endocannabinoid signaling|hsa04725,Cholinergic synapse|hsa04724,Glutamatergic synapse|hsa04727,GABAergic synapse|hsa04726,Serotoner…			http://www.uniprot.org/uniprot/P17612	False
Q96FW1	4.53468	2.181	Q96FW1	OTUB1	GO:0080090,regulation of primary metabolic process|GO:0019222,regulation of metabolic process|GO:0048585,negative regulation of response to stimulus|GO:0048583,regulation of response to stimulus|GO:0031057,negative regulation of histone modification|GO:0031056,regulation of histone modification|GO:0071840,cellular component organization or biogenesis|GO:0051716,cellular response to stimulus|GO:00…	GO:0043231,intracellular membrane-bounded organelle|GO:0005737,cytoplasm|GO:0005622,intracellular|GO:0043230,extracellular organelle|GO:0031982,vesicle|GO:0044421,extracellular region part|GO:0043227,membrane-bounded organelle|GO:0005634,nucleus|GO:0044464,cell part|GO:0005623,cell|GO:0031988,membrane-bounded vesicle|GO:0043229,intracellular organelle|GO:0005576,extracellular region|GO:0044424,in…	GO:0016787,hydrolase activity|GO:0019784,NEDD8-specific protease activity|GO:0019783,ubiquitin-like protein-specific protease activity|GO:0032182,ubiquitin-like protein binding|GO:0019899,enzyme binding|GO:0008234,cysteine-type peptidase activity|GO:0003824,catalytic activity|GO:0036459,thiol-dependent ubiquitinyl hydrolase activity|GO:0070011,peptidase activity, acting on L-amino acid peptides|G…				http://www.uniprot.org/uniprot/Q96FW1	False
Q14444	4.44752	2.153	Q14444	CAPRIN1	GO:0080090,regulation of primary metabolic process|GO:0019222,regulation of metabolic process|GO:0048468,cell development|GO:0016358,dendrite development|GO:0031344,regulation of cell projection organization|GO:0071840,cellular component organization or biogenesis|GO:0031346,positive regulation of cell projection organization|GO:0097061,dendritic spine organization|GO:0010605,negative regulation …	GO:0035770,ribonucleoprotein granule|GO:0044464,cell part|GO:0030425,dendrite|GO:0043229,intracellular organelle|GO:0043228,non-membrane-bounded organelle|GO:0036464,cytoplasmic ribonucleoprotein granule|GO:0031226,intrinsic component of plasma membrane|GO:0043226,organelle|GO:0031224,intrinsic component of membrane|GO:0005737,cytoplasm|GO:0016021,integral component of membrane|GO:0016020,membran…	GO:0097159,organic cyclic compound binding|GO:0044822,poly(A) RNA binding|GO:0005488,binding|GO:0003676,nucleic acid binding|GO:1901363,heterocyclic compound binding|GO:0003723,RNA binding|GO:0005515,protein binding				http://www.uniprot.org/uniprot/Q14444	False
P05023	4.44443	2.152	P05023	ATP1A1	GO:0080090,regulation of primary metabolic process|GO:0019222,regulation of metabolic process|GO:0051049,regulation of transport|GO:0055080,cation homeostasis|GO:0003012,muscle system process|GO:0003013,circulatory system process|GO:0055075,potassium ion homeostasis|GO:0045989,positive regulation of striated muscle contraction|GO:0001508,action potential|GO:0060081,membrane hyperpolarization|GO:1…	GO:0098590,plasma membrane region|GO:0044463,cell projection part|GO:0005783,endoplasmic reticulum|GO:0044421,extracellular region part|GO:0048770,pigment granule|GO:0014704,intercalated disc|GO:0005901,caveola|GO:0043229,intracellular organelle|GO:0071944,cell periphery|GO:0045202,synapse|GO:0090533,cation-transporting ATPase complex|GO:0042383,sarcolemma|GO:0044853,plasma membrane raft|GO:00432…	GO:0016791,phosphatase activity|GO:0035639,purine ribonucleoside triphosphate binding|GO:0031420,alkali metal ion binding|GO:0019899,enzyme binding|GO:0042578,phosphoric ester hydrolase activity|GO:0005488,binding|GO:0016887,ATPase activity|GO:0043548,phosphatidylinositol 3-kinase binding|GO:0019901,protein kinase binding|GO:0043167,ion binding|GO:1901363,heterocyclic compound binding|GO:0001883,…	hsa04970,Salivary secretion|hsa04971,Gastric acid secretion|hsa04961,Endocrine and other factor-regulated calcium reabsorption|hsa04960,Aldosterone-regulated sodium reabsorption|hsa04974,Protein digestion and absorption|hsa04976,Bile secretion|hsa04964,Proximal tubule bicarbonate reclamation|hsa04022,cGMP-PKG signaling pathway|hsa04972,Pancreatic secretion|hsa04024,cAMP signaling pathway|hsa04973…		D00112,G-Strophanthin (JAN); Ouabain; Ouabain octahydrate|D00297,Digitoxin (JP16/USP/INN); Crystodigin (TN)|D00298,Digoxin (JP16/USP); Lanoxicaps (TN); Lanoxin (TN)|D01240,Deslanoside (JP16/USP/INN); Cedilanid-d (TN)|D01379,Proscillaridin (JAN/USAN/INN); Talusin (TN)|D01972,Lanatoside C (JP16/INN); Digilanogen C (TN)|D02587,Metildigoxin (JP16); Lanirapid (TN)|D06881,Acetyldigitoxin (INN); Acylani…	http://www.uniprot.org/uniprot/P05023	False
P17844	4.42292	2.145	P17844	DDX5	GO:0080090,regulation of primary metabolic process|GO:0019222,regulation of metabolic process|GO:0050684,regulation of mRNA processing|GO:0048584,positive regulation of response to stimulus|GO:0048583,regulation of response to stimulus|GO:0009299,mRNA transcription|GO:0001503,ossification|GO:0007165,signal transduction|GO:1901362,organic cyclic compound biosynthetic process|GO:1901360,organic cyc…	GO:0031974,membrane-enclosed lumen|GO:0043229,intracellular organelle|GO:0043228,non-membrane-bounded organelle|GO:0030529,intracellular ribonucleoprotein complex|GO:0043227,membrane-bounded organelle|GO:0043226,organelle|GO:0070062,extracellular exosome|GO:0031981,nuclear lumen|GO:0005730,nucleolus|GO:0005634,nucleus|GO:0016020,membrane|GO:0031988,membrane-bounded vesicle|GO:0005654,nucleoplasm|…	GO:0016887,ATPase activity|GO:0008026,ATP-dependent helicase activity|GO:0048306,calcium-dependent protein binding|GO:0035639,purine ribonucleoside triphosphate binding|GO:0050681,androgen receptor binding|GO:0019899,enzyme binding|GO:0005488,binding|GO:0003676,nucleic acid binding|GO:0008186,RNA-dependent ATPase activity|GO:0043167,ion binding|GO:1901363,heterocyclic compound binding|GO:0001883,…	hsa05205,Proteoglycans in cancer|hsa03040,Spliceosome|hsa05202,Transcriptional misregulation in cancer			http://www.uniprot.org/uniprot/P17844	False
O14828	4.41373	2.142	O14828	SCAMP3	GO:0008104,protein localization|GO:0044699,single-organism process|GO:0033993,response to lipid|GO:0051179,localization|GO:0071702,organic substance transport|GO:0033036,macromolecule localization|GO:0032526,response to retinoic acid|GO:0048193,Golgi vesicle transport|GO:0006810,transport|GO:0045184,establishment of protein localization|GO:0044765,single-organism transport|GO:0001101,response to …	GO:0043229,intracellular organelle|GO:0005622,intracellular|GO:0043227,membrane-bounded organelle|GO:0043226,organelle|GO:0031224,intrinsic component of membrane|GO:0005737,cytoplasm|GO:0031982,vesicle|GO:0016021,integral component of membrane|GO:0016020,membrane|GO:0031988,membrane-bounded vesicle|GO:0044431,Golgi apparatus part|GO:0005794,Golgi apparatus|GO:0098588,bounding membrane of organell…	GO:0031625,ubiquitin protein ligase binding|GO:0044389,ubiquitin-like protein ligase binding|GO:0019899,enzyme binding|GO:0005488,binding|GO:0005515,protein binding				http://www.uniprot.org/uniprot/O14828	False
Q9NQW7	4.38933	2.134	Q9NQW7	XPNPEP1	GO:0044238,primary metabolic process|GO:1901575,organic substance catabolic process|GO:1901564,organonitrogen compound metabolic process|GO:1901565,organonitrogen compound catabolic process|GO:0043603,cellular amide metabolic process|GO:0019538,protein metabolic process|GO:0009987,cellular process|GO:0010815,bradykinin catabolic process|GO:0043171,peptide catabolic process|GO:0043170,macromolecul…	GO:0005737,cytoplasm|GO:0005622,intracellular|GO:0043230,extracellular organelle|GO:0031982,vesicle|GO:0044421,extracellular region part|GO:0043227,membrane-bounded organelle|GO:0044464,cell part|GO:0005623,cell|GO:0031988,membrane-bounded vesicle|GO:0005576,extracellular region|GO:0044424,intracellular part|GO:1903561,extracellular vesicle|GO:0065010,extracellular membrane-bounded organelle|GO:0…	GO:0005488,binding|GO:0004177,aminopeptidase activity|GO:0046914,transition metal ion binding|GO:0016787,hydrolase activity|GO:0003824,catalytic activity|GO:0043169,cation binding|GO:0030145,manganese ion binding|GO:0043167,ion binding|GO:0008238,exopeptidase activity|GO:0070011,peptidase activity, acting on L-amino acid peptides|GO:0042802,identical protein binding|GO:0005515,protein binding|GO:…				http://www.uniprot.org/uniprot/Q9NQW7	False
Q53FS6	4.37111	2.128	Q53FS6	Q53FS6	GO:0006950,response to stress|GO:0009987,cellular process|GO:0006457,protein folding|GO:0050896,response to stimulus		GO:0043168,anion binding|GO:0030554,adenyl nucleotide binding|GO:0035639,purine ribonucleoside triphosphate binding|GO:0097159,organic cyclic compound binding|GO:1901265,nucleoside phosphate binding|GO:0000166,nucleotide binding|GO:0036094,small molecule binding|GO:0097367,carbohydrate derivative binding|GO:0051082,unfolded protein binding|GO:0032559,adenyl ribonucleotide binding|GO:0032553,ribon…				http://www.uniprot.org/uniprot/Q53FS6	False
G3XAL0	4.36506	2.126	G3XAL0	MDH2	GO:0019752,carboxylic acid metabolic process|GO:0006099,tricarboxylic acid cycle|GO:0009060,aerobic respiration|GO:0044281,small molecule metabolic process|GO:0006091,generation of precursor metabolites and energy|GO:0072350,tricarboxylic acid metabolic process|GO:0044699,single-organism process|GO:0044710,single-organism metabolic process|GO:0071704,organic substance metabolic process|GO:0044238…	GO:0031974,membrane-enclosed lumen|GO:0043229,intracellular organelle|GO:0071944,cell periphery|GO:0043227,membrane-bounded organelle|GO:0043226,organelle|GO:0005737,cytoplasm|GO:0031981,nuclear lumen|GO:0005634,nucleus|GO:0016020,membrane|GO:0005739,mitochondrion|GO:0005654,nucleoplasm|GO:0005886,plasma membrane|GO:0043231,intracellular membrane-bounded organelle|GO:0043233,organelle lumen|GO:00…	GO:0016614,oxidoreductase activity, acting on CH-OH group of donors|GO:0016615,malate dehydrogenase activity|GO:0016616,oxidoreductase activity, acting on the CH-OH group of donors, NAD or NADP as acceptor|GO:0003824,catalytic activity|GO:0030060,L-malate dehydrogenase activity|GO:0016491,oxidoreductase activity	hsa00620,Pyruvate metabolism|hsa01100,Metabolic pathways|hsa00630,Glyoxylate and dicarboxylate metabolism|hsa01200,Carbon metabolism|hsa00270,Cysteine and methionine metabolism|hsa00020,Citrate cycle (TCA cycle)			http://www.uniprot.org/uniprot/G3XAL0	False
A0A384N6A4	4.35297	2.122	P61604	HSPE1	GO:0032502,developmental process|GO:0006457,protein folding|GO:0080090,regulation of primary metabolic process|GO:0019222,regulation of metabolic process|GO:0031325,positive regulation of cellular metabolic process|GO:0030154,cell differentiation|GO:0031323,regulation of cellular metabolic process|GO:2001056,positive regulation of cysteine-type endopeptidase activity|GO:0031638,zymogen activation…	GO:0031974,membrane-enclosed lumen|GO:0043229,intracellular organelle|GO:0043227,membrane-bounded organelle|GO:0043226,organelle|GO:0005737,cytoplasm|GO:0070062,extracellular exosome|GO:0016020,membrane|GO:0005739,mitochondrion|GO:0031988,membrane-bounded vesicle|GO:0005759,mitochondrial matrix|GO:1903561,extracellular vesicle|GO:0031982,vesicle|GO:0043230,extracellular organelle|GO:0043231,intra…	GO:0035639,purine ribonucleoside triphosphate binding|GO:0005488,binding|GO:0003676,nucleic acid binding|GO:0000166,nucleotide binding|GO:1901363,heterocyclic compound binding|GO:1901265,nucleoside phosphate binding|GO:0001882,nucleoside binding|GO:0043168,anion binding|GO:0051087,chaperone binding|GO:0051082,unfolded protein binding|GO:0043167,ion binding|GO:0001883,purine nucleoside binding|GO:…				http://www.uniprot.org/uniprot/P61604	False
Q15102	4.29602	2.103	Q15102	PAFAH1B3	GO:0019953,sexual reproduction|GO:0060322,head development|GO:0044707,single-multicellular organism process|GO:0044699,single-organism process|GO:0048609,multicellular organismal reproductive process|GO:0044712,single-organism catabolic process|GO:0044710,single-organism metabolic process|GO:0000003,reproduction|GO:0016042,lipid catabolic process|GO:0071704,organic substance metabolic process|GO:…	GO:0005737,cytoplasm|GO:0005622,intracellular|GO:0043230,extracellular organelle|GO:0031982,vesicle|GO:0044421,extracellular region part|GO:0043227,membrane-bounded organelle|GO:0005829,cytosol|GO:0016020,membrane|GO:0044464,cell part|GO:0005623,cell|GO:0031988,membrane-bounded vesicle|GO:0044444,cytoplasmic part|GO:0005576,extracellular region|GO:0044424,intracellular part|GO:1903561,extracellul…	GO:0016787,hydrolase activity|GO:0016407,acetyltransferase activity|GO:0052689,carboxylic ester hydrolase activity|GO:0016788,hydrolase activity, acting on ester bonds|GO:0003824,catalytic activity|GO:0016740,transferase activity|GO:0003847,1-alkyl-2-acetylglycerophosphocholine esterase activity|GO:0016747,transferase activity, transferring acyl groups other than amino-acyl groups|GO:0005515,prot…	hsa01100,Metabolic pathways|hsa00565,Ether lipid metabolism			http://www.uniprot.org/uniprot/Q15102	False
P16401	4.29304	2.102	P16401	HIST1H1B	GO:0006479,protein methylation|GO:0034728,nucleosome organization|GO:0008104,protein localization|GO:0080090,regulation of primary metabolic process|GO:0019222,regulation of metabolic process|GO:0031056,regulation of histone modification|GO:0051567,histone H3-K9 methylation|GO:0031058,positive regulation of histone modification|GO:1901362,organic cyclic compound biosynthetic process|GO:0071840,ce…	GO:0031974,membrane-enclosed lumen|GO:0044815,DNA packaging complex|GO:0043229,intracellular organelle|GO:0043228,non-membrane-bounded organelle|GO:0000785,chromatin|GO:0000786,nucleosome|GO:0000228,nuclear chromosome|GO:0043227,membrane-bounded organelle|GO:0043226,organelle|GO:0070062,extracellular exosome|GO:0031981,nuclear lumen|GO:0005634,nucleus|GO:0031988,membrane-bounded vesicle|GO:004445…	GO:0043566,structure-specific DNA binding|GO:0005515,protein binding|GO:0097159,organic cyclic compound binding|GO:0044822,poly(A) RNA binding|GO:0019899,enzyme binding|GO:0031490,chromatin DNA binding|GO:0044877,macromolecular complex binding|GO:0003723,RNA binding|GO:0003676,nucleic acid binding|GO:0003677,DNA binding|GO:0003682,chromatin binding|GO:0042826,histone deacetylase binding|GO:190136…				http://www.uniprot.org/uniprot/P16401	False
B4DZ53	4.20469	2.072	B4DZ53	B4DZ53	GO:0044238,primary metabolic process|GO:0005975,carbohydrate metabolic process|GO:0008152,metabolic process|GO:0071704,organic substance metabolic process		GO:0016787,hydrolase activity|GO:0030246,carbohydrate binding|GO:0016798,hydrolase activity, acting on glycosyl bonds|GO:0003824,catalytic activity|GO:0005488,binding|GO:0004553,hydrolase activity, hydrolyzing O-glycosyl compounds				http://www.uniprot.org/uniprot/B4DZ53	False
B2R644	4.17854	2.063	O94760	DDAH1	GO:0019222,regulation of metabolic process|GO:0072359,circulatory system development|GO:0003013,circulatory system process|GO:0007165,signal transduction|GO:0044282,small molecule catabolic process|GO:0044712,single-organism catabolic process|GO:0044710,single-organism metabolic process|GO:0048514,blood vessel morphogenesis|GO:0048518,positive regulation of biological process|GO:0043436,oxoacid m…	GO:0043231,intracellular membrane-bounded organelle|GO:0005737,cytoplasm|GO:0005622,intracellular|GO:0043230,extracellular organelle|GO:0031982,vesicle|GO:0044421,extracellular region part|GO:0043227,membrane-bounded organelle|GO:0044464,cell part|GO:0044444,cytoplasmic part|GO:0005739,mitochondrion|GO:0031988,membrane-bounded vesicle|GO:0043229,intracellular organelle|GO:0005576,extracellular re…	GO:0043168,anion binding|GO:0016787,hydrolase activity|GO:0043169,cation binding|GO:0043177,organic acid binding|GO:0016813,hydrolase activity, acting on carbon-nitrogen (but not peptide) bonds, in linear amidines|GO:0016810,hydrolase activity, acting on carbon-nitrogen (but not peptide) bonds|GO:0031406,carboxylic acid binding|GO:0043167,ion binding|GO:0036094,small molecule binding|GO:0003824,c…				http://www.uniprot.org/uniprot/O94760	False
O43809	4.17854	2.063	O43809	NUDT21	GO:0022607,cellular component assembly|GO:0032774,RNA biosynthetic process|GO:0070271,protein complex biogenesis|GO:0043933,macromolecular complex subunit organization|GO:0044237,cellular metabolic process|GO:0090304,nucleic acid metabolic process|GO:0044249,cellular biosynthetic process|GO:0034641,cellular nitrogen compound metabolic process|GO:0006807,nitrogen compound metabolic process|GO:0016…	GO:0044464,cell part|GO:0031974,membrane-enclosed lumen|GO:0043229,intracellular organelle|GO:0043228,non-membrane-bounded organelle|GO:0043227,membrane-bounded organelle|GO:0043226,organelle|GO:0005856,cytoskeleton|GO:0016604,nuclear body|GO:0031981,nuclear lumen|GO:0005813,centrosome|GO:0005634,nucleus|GO:0005815,microtubule organizing center|GO:0005654,nucleoplasm|GO:0044430,cytoskeletal part|…	GO:0005488,binding|GO:0016787,hydrolase activity|GO:0005515,protein binding|GO:0097159,organic cyclic compound binding|GO:0044822,poly(A) RNA binding|GO:0019899,enzyme binding|GO:0017091,AU-rich element binding|GO:0003824,catalytic activity|GO:0003723,RNA binding|GO:0003676,nucleic acid binding|GO:0046983,protein dimerization activity|GO:0042803,protein homodimerization activity|GO:0042826,histon…	hsa03015,mRNA surveillance pathway			http://www.uniprot.org/uniprot/O43809	False
Q13344	4.17275	2.061	Q13344	Q13344	GO:0080090,regulation of primary metabolic process|GO:0019222,regulation of metabolic process|GO:0031326,regulation of cellular biosynthetic process|GO:0031323,regulation of cellular metabolic process|GO:0090304,nucleic acid metabolic process|GO:0044249,cellular biosynthetic process|GO:0034641,cellular nitrogen compound metabolic process|GO:0006807,nitrogen compound metabolic process|GO:0034645,c…		GO:0043169,cation binding|GO:0097159,organic cyclic compound binding|GO:0043167,ion binding|GO:0003723,RNA binding|GO:0003676,nucleic acid binding|GO:0046872,metal ion binding|GO:1901363,heterocyclic compound binding|GO:0005488,binding				http://www.uniprot.org/uniprot/Q13344	False
P62826	4.16697	2.059	P62826	RAN	GO:0051169,nuclear transport|GO:0051168,nuclear export|GO:0080090,regulation of primary metabolic process|GO:0019222,regulation of metabolic process|GO:0000060,protein import into nucleus, translocation|GO:0030518,intracellular steroid hormone receptor signaling pathway|GO:0008104,protein localization|GO:0007165,signal transduction|GO:0051656,establishment of organelle localization|GO:1901362,org…	GO:0098796,membrane protein complex|GO:0044421,extracellular region part|GO:0044464,cell part|GO:0055037,recycling endosome|GO:0048770,pigment granule|GO:0031974,membrane-enclosed lumen|GO:0031074,nucleocytoplasmic transport complex|GO:0043229,intracellular organelle|GO:0043228,non-membrane-bounded organelle|GO:0000785,chromatin|GO:0005815,microtubule organizing center|GO:0043227,membrane-bounded…	GO:0035639,purine ribonucleoside triphosphate binding|GO:0050681,androgen receptor binding|GO:0070883,pre-miRNA binding|GO:0044877,macromolecular complex binding|GO:0005488,binding|GO:0003676,nucleic acid binding|GO:0043167,ion binding|GO:1901363,heterocyclic compound binding|GO:0001883,purine nucleoside binding|GO:0001882,nucleoside binding|GO:0043168,anion binding|GO:0019001,guanyl nucleotide b…	hsa03008,Ribosome biogenesis in eukaryotes|hsa05166,Human T-cell leukemia virus 1 infection|hsa03013,RNA transport			http://www.uniprot.org/uniprot/P62826	False
P14866	4.11816	2.042	P14866	HNRNPL	GO:0090304,nucleic acid metabolic process|GO:0034641,cellular nitrogen compound metabolic process|GO:0006807,nitrogen compound metabolic process|GO:0044237,cellular metabolic process|GO:1901360,organic cyclic compound metabolic process|GO:0006139,nucleobase-containing compound metabolic process|GO:0044260,cellular macromolecule metabolic process|GO:0071704,organic substance metabolic process|GO:0…	GO:0031974,membrane-enclosed lumen|GO:0043229,intracellular organelle|GO:0030529,intracellular ribonucleoprotein complex|GO:0043227,membrane-bounded organelle|GO:0043226,organelle|GO:0005737,cytoplasm|GO:0070062,extracellular exosome|GO:0031981,nuclear lumen|GO:0005634,nucleus|GO:0016020,membrane|GO:0031988,membrane-bounded vesicle|GO:0005654,nucleoplasm|GO:0032991,macromolecular complex|GO:19035…	GO:0044212,transcription regulatory region DNA binding|GO:0005515,protein binding|GO:0097159,organic cyclic compound binding|GO:0044822,poly(A) RNA binding|GO:0000975,regulatory region DNA binding|GO:0001067,regulatory region nucleic acid binding|GO:0000166,nucleotide binding|GO:0036094,small molecule binding|GO:0003723,RNA binding|GO:0003676,nucleic acid binding|GO:0003677,DNA binding|GO:1901363…				http://www.uniprot.org/uniprot/P14866	False
P38159	4.11246	2.04	P38159	RBMX	GO:0080090,regulation of primary metabolic process|GO:0019222,regulation of metabolic process|GO:0050685,positive regulation of mRNA processing|GO:0050684,regulation of mRNA processing|GO:0050686,negative regulation of mRNA processing|GO:0001503,ossification|GO:1901362,organic cyclic compound biosynthetic process|GO:0071840,cellular component organization or biogenesis|GO:0000245,spliceosomal com…	GO:0031974,membrane-enclosed lumen|GO:0043229,intracellular organelle|GO:0043228,non-membrane-bounded organelle|GO:0000785,chromatin|GO:0000228,nuclear chromosome|GO:0030529,intracellular ribonucleoprotein complex|GO:0043227,membrane-bounded organelle|GO:0043226,organelle|GO:0005719,nuclear euchromatin|GO:0070062,extracellular exosome|GO:0031981,nuclear lumen|GO:0005615,extracellular space|GO:000…	GO:0005488,binding|GO:0044212,transcription regulatory region DNA binding|GO:0003676,nucleic acid binding|GO:0005515,protein binding|GO:0097159,organic cyclic compound binding|GO:0044822,poly(A) RNA binding|GO:0003677,DNA binding|GO:0001067,regulatory region nucleic acid binding|GO:0000166,nucleotide binding|GO:0036094,small molecule binding|GO:0003727,single-stranded RNA binding|GO:0044877,macro…	hsa03040,Spliceosome			http://www.uniprot.org/uniprot/P38159	False
Q96AE4	4.02503	2.009	Q96AE4	FUBP1	GO:0032774,RNA biosynthetic process|GO:0080090,regulation of primary metabolic process|GO:0019222,regulation of metabolic process|GO:0031328,positive regulation of cellular biosynthetic process|GO:0031326,regulation of cellular biosynthetic process|GO:0031325,positive regulation of cellular metabolic process|GO:0051173,positive regulation of nitrogen compound metabolic process|GO:0031323,regulati…	GO:0044446,intracellular organelle part|GO:0043231,intracellular membrane-bounded organelle|GO:0031981,nuclear lumen|GO:0043233,organelle lumen|GO:0005634,nucleus|GO:0044464,cell part|GO:0031974,membrane-enclosed lumen|GO:0005622,intracellular|GO:0005654,nucleoplasm|GO:0070013,intracellular organelle lumen|GO:0043229,intracellular organelle|GO:0044428,nuclear part|GO:0005623,cell|GO:0044424,intra…	GO:0043566,structure-specific DNA binding|GO:0005515,protein binding|GO:0003700,transcription factor activity, sequence-specific DNA binding|GO:0097159,organic cyclic compound binding|GO:0044822,poly(A) RNA binding|GO:0003705,transcription factor activity, RNA polymerase II distal enhancer sequence-specific binding|GO:0001071,nucleic acid binding transcription factor activity|GO:0001228,transcrip…				http://www.uniprot.org/uniprot/Q96AE4	False
Q96PK6	4.02224	2.008	Q96PK6	RBM14	GO:0080090,regulation of primary metabolic process|GO:0019222,regulation of metabolic process|GO:2001141,regulation of RNA biosynthetic process|GO:0006476,protein deacetylation|GO:0007165,signal transduction|GO:1901362,organic cyclic compound biosynthetic process|GO:0071840,cellular component organization or biogenesis|GO:0044710,single-organism metabolic process|GO:0045786,negative regulation of…	GO:0031974,membrane-enclosed lumen|GO:0043229,intracellular organelle|GO:0043228,non-membrane-bounded organelle|GO:0016592,mediator complex|GO:0043227,membrane-bounded organelle|GO:0043226,organelle|GO:0031981,nuclear lumen|GO:0005730,nucleolus|GO:0005634,nucleus|GO:0030529,intracellular ribonucleoprotein complex|GO:0005654,nucleoplasm|GO:0044451,nucleoplasm part|GO:0043234,protein complex|GO:003…	GO:0005488,binding|GO:0001104,RNA polymerase II transcription cofactor activity|GO:0030674,protein binding, bridging|GO:0005515,protein binding|GO:0097159,organic cyclic compound binding|GO:0044822,poly(A) RNA binding|GO:0003713,transcription coactivator activity|GO:0003712,transcription cofactor activity|GO:0000166,nucleotide binding|GO:0036094,small molecule binding|GO:0001076,transcription fac…				http://www.uniprot.org/uniprot/Q96PK6	False
Q92626	4.00277	2.001	Q92626	PXDN	GO:0042221,response to chemical|GO:0019221,cytokine-mediated signaling pathway|GO:0048585,negative regulation of response to stimulus|GO:0048583,regulation of response to stimulus|GO:0044248,cellular catabolic process|GO:0023057,negative regulation of signaling|GO:0042744,hydrogen peroxide catabolic process|GO:0023052,signaling|GO:0010648,negative regulation of cell communication|GO:0007166,cell …	GO:0005783,endoplasmic reticulum|GO:0031012,extracellular matrix|GO:0043229,intracellular organelle|GO:0043227,membrane-bounded organelle|GO:0043226,organelle|GO:0005737,cytoplasm|GO:0070062,extracellular exosome|GO:0031988,membrane-bounded vesicle|GO:0031982,vesicle|GO:0012505,endomembrane system|GO:1903561,extracellular vesicle|GO:0005615,extracellular space|GO:0043230,extracellular organelle|G…	GO:0005126,cytokine receptor binding|GO:0005201,extracellular matrix structural constituent|GO:0019966,interleukin-1 binding|GO:0019955,cytokine binding|GO:0005488,binding|GO:0043167,ion binding|GO:1901363,heterocyclic compound binding|GO:0016491,oxidoreductase activity|GO:0043169,cation binding|GO:0098772,molecular function regulator|GO:0030545,receptor regulator activity|GO:0030547,receptor inh…				http://www.uniprot.org/uniprot/Q92626	False
P23526	3.97788	1.992	P23526	AHCY	GO:0007610,behavior|GO:0009164,nucleoside catabolic process|GO:0044281,small molecule metabolic process|GO:0044282,small molecule catabolic process|GO:0044283,small molecule biosynthetic process|GO:0046130,purine ribonucleoside catabolic process|GO:1901360,organic cyclic compound metabolic process|GO:1901361,organic cyclic compound catabolic process|GO:0044712,single-organism catabolic process|GO…	GO:0048770,pigment granule|GO:0043229,intracellular organelle|GO:0043227,membrane-bounded organelle|GO:0043226,organelle|GO:0005737,cytoplasm|GO:1903561,extracellular vesicle|GO:0070062,extracellular exosome|GO:0016023,cytoplasmic, membrane-bounded vesicle|GO:0031410,cytoplasmic vesicle|GO:0005634,nucleus|GO:0031988,membrane-bounded vesicle|GO:0097458,neuron part|GO:0043005,neuron projection|GO:0…	GO:0016787,hydrolase activity|GO:0030554,adenyl nucleotide binding|GO:0016801,hydrolase activity, acting on ether bonds|GO:0051287,NAD binding|GO:0004013,adenosylhomocysteinase activity|GO:0016802,trialkylsulfonium hydrolase activity|GO:0036094,small molecule binding|GO:0000166,nucleotide binding|GO:0050662,coenzyme binding|GO:0003824,catalytic activity|GO:0048037,cofactor binding|GO:0042802,iden…	hsa01100,Metabolic pathways|hsa00270,Cysteine and methionine metabolism			http://www.uniprot.org/uniprot/P23526	False
Q01844	3.96137	1.986	Q01844	EWSR1	GO:0080090,regulation of primary metabolic process|GO:0019222,regulation of metabolic process|GO:0031326,regulation of cellular biosynthetic process|GO:0031323,regulation of cellular metabolic process|GO:0090304,nucleic acid metabolic process|GO:0044249,cellular biosynthetic process|GO:0034641,cellular nitrogen compound metabolic process|GO:0006807,nitrogen compound metabolic process|GO:0034645,c…	GO:0031974,membrane-enclosed lumen|GO:0043229,intracellular organelle|GO:0071944,cell periphery|GO:0043227,membrane-bounded organelle|GO:0043226,organelle|GO:0005737,cytoplasm|GO:0031981,nuclear lumen|GO:0005730,nucleolus|GO:0005634,nucleus|GO:0016020,membrane|GO:0005654,nucleoplasm|GO:0005886,plasma membrane|GO:0043231,intracellular membrane-bounded organelle|GO:0043232,intracellular non-membran…	GO:0005488,binding|GO:0043169,cation binding|GO:0005515,protein binding|GO:0046914,transition metal ion binding|GO:0097159,organic cyclic compound binding|GO:0044822,poly(A) RNA binding|GO:0000166,nucleotide binding|GO:0036094,small molecule binding|GO:0043167,ion binding|GO:0042802,identical protein binding|GO:0003723,RNA binding|GO:0003676,nucleic acid binding|GO:0005516,calmodulin binding|GO:0…	hsa05202,Transcriptional misregulation in cancer	H00035,Ewing's sarcoma|H00052,Clear cell sarcoma of soft tissue|H00053,Extraskeletal myxoid chondrosarcoma		http://www.uniprot.org/uniprot/Q01844	False
P0DMV9	3.90413	1.965	P0DMV9	HSPA1B	GO:2001234,negative regulation of apoptotic signaling pathway|GO:2001236,regulation of extrinsic apoptotic signaling pathway|GO:2001237,negative regulation of extrinsic apoptotic signaling pathway|GO:0090083,regulation of inclusion body assembly|GO:0019221,cytokine-mediated signaling pathway|GO:0019222,regulation of metabolic process|GO:2001233,regulation of apoptotic signaling pathway|GO:0048585…	GO:0016234,inclusion body|GO:0043229,intracellular organelle|GO:0043228,non-membrane-bounded organelle|GO:0072562,blood microparticle|GO:0005924,cell-substrate adherens junction|GO:0005925,focal adhesion|GO:0043226,organelle|GO:0030054,cell junction|GO:0030055,cell-substrate junction|GO:0005856,cytoskeleton|GO:0005615,extracellular space|GO:0005813,centrosome|GO:0005814,centriole|GO:0005815,micro…	GO:0044389,ubiquitin-like protein ligase binding|GO:0035639,purine ribonucleoside triphosphate binding|GO:0044183,protein binding involved in protein folding|GO:0019899,enzyme binding|GO:0060089,molecular transducer activity|GO:0004872,receptor activity|GO:0016887,ATPase activity|GO:0031072,heat shock protein binding|GO:0043167,ion binding|GO:1901363,heterocyclic compound binding|GO:0001883,purin…	hsa05134,Legionellosis|hsa03040,Spliceosome|hsa04612,Antigen processing and presentation|hsa04915,Estrogen signaling pathway|hsa04141,Protein processing in endoplasmic reticulum|hsa04144,Endocytosis|hsa04010,MAPK signaling pathway|hsa05164,Influenza A|hsa04213,Longevity regulating pathway - multiple species|hsa05145,Toxoplasmosis|hsa05162,Measles|hsa05020,Prion diseases			http://www.uniprot.org/uniprot/P0DMV9	False
P08621	3.88523	1.958	P08621	SNRNP70	GO:0080090,regulation of primary metabolic process|GO:0019222,regulation of metabolic process|GO:0050685,positive regulation of mRNA processing|GO:0050684,regulation of mRNA processing|GO:0031325,positive regulation of cellular metabolic process|GO:0031323,regulation of cellular metabolic process|GO:0090304,nucleic acid metabolic process|GO:0034641,cellular nitrogen compound metabolic process|GO:…	GO:0031974,membrane-enclosed lumen|GO:0043229,intracellular organelle|GO:0043227,membrane-bounded organelle|GO:0043226,organelle|GO:0016607,nuclear speck|GO:0044446,intracellular organelle part|GO:0016604,nuclear body|GO:0031981,nuclear lumen|GO:0005634,nucleus|GO:0030529,intracellular ribonucleoprotein complex|GO:0005654,nucleoplasm|GO:0044451,nucleoplasm part|GO:0032991,macromolecular complex|G…	GO:0005515,protein binding|GO:0097159,organic cyclic compound binding|GO:0044822,poly(A) RNA binding|GO:0000166,nucleotide binding|GO:0036094,small molecule binding|GO:0003723,RNA binding|GO:0003676,nucleic acid binding|GO:1901363,heterocyclic compound binding|GO:1901265,nucleoside phosphate binding|GO:0005488,binding|GO:0030619,U1 snRNA binding|GO:1990446,U1 snRNP binding|GO:0070990,snRNP bindin…	hsa03040,Spliceosome			http://www.uniprot.org/uniprot/P08621	False
Q9Y6M1	3.85572	1.947	Q9Y6M1	IGF2BP2	GO:0015931,nucleobase-containing compound transport|GO:0044238,primary metabolic process|GO:0009892,negative regulation of metabolic process|GO:0080090,regulation of primary metabolic process|GO:0009890,negative regulation of biosynthetic process|GO:0031327,negative regulation of cellular biosynthetic process|GO:0051246,regulation of protein metabolic process|GO:0031324,negative regulation of cel…	GO:0005856,cytoskeleton|GO:0005737,cytoplasm|GO:0005829,cytosol|GO:0043231,intracellular membrane-bounded organelle|GO:0043232,intracellular non-membrane-bounded organelle|GO:0005634,nucleus|GO:0044464,cell part|GO:0044444,cytoplasmic part|GO:0005623,cell|GO:0005622,intracellular|GO:0043229,intracellular organelle|GO:0043228,non-membrane-bounded organelle|GO:0044424,intracellular part|GO:0043227,…	GO:0005488,binding|GO:0003729,mRNA binding|GO:0005515,protein binding|GO:0097159,organic cyclic compound binding|GO:0044822,poly(A) RNA binding|GO:0000166,nucleotide binding|GO:0036094,small molecule binding|GO:0003723,RNA binding|GO:0003676,nucleic acid binding|GO:0048027,mRNA 5'-UTR binding|GO:0045182,translation regulator activity|GO:1901363,heterocyclic compound binding|GO:1901265,nucleoside …				http://www.uniprot.org/uniprot/Q9Y6M1	False
P62312	3.8344	1.939	P62312	LSM6	GO:0090304,nucleic acid metabolic process|GO:0034641,cellular nitrogen compound metabolic process|GO:0006807,nitrogen compound metabolic process|GO:0044237,cellular metabolic process|GO:0008033,tRNA processing|GO:0034660,ncRNA metabolic process|GO:0071840,cellular component organization or biogenesis|GO:1901361,organic cyclic compound catabolic process|GO:0006139,nucleobase-containing compound me…	GO:0035770,ribonucleoprotein granule|GO:0005732,small nucleolar ribonucleoprotein complex|GO:0044464,cell part|GO:0031974,membrane-enclosed lumen|GO:0043229,intracellular organelle|GO:0043228,non-membrane-bounded organelle|GO:0036464,cytoplasmic ribonucleoprotein granule|GO:0030529,intracellular ribonucleoprotein complex|GO:0043227,membrane-bounded organelle|GO:0043226,organelle|GO:0005737,cytopl…	GO:0003676,nucleic acid binding|GO:0097159,organic cyclic compound binding|GO:0044822,poly(A) RNA binding|GO:0003723,RNA binding|GO:0005515,protein binding|GO:1901363,heterocyclic compound binding|GO:0005488,binding	hsa03040,Spliceosome|hsa03018,RNA degradation			http://www.uniprot.org/uniprot/P62312	False
P61955	3.81848	1.933	P61955	P61955							http://www.uniprot.org/uniprot/P61955	False
P31040	3.72955	1.899	P31040	SDHA	GO:0044707,single-multicellular organism process|GO:0019752,carboxylic acid metabolic process|GO:0006099,tricarboxylic acid cycle|GO:0009060,aerobic respiration|GO:0044281,small molecule metabolic process|GO:0006091,generation of precursor metabolites and energy|GO:0072350,tricarboxylic acid metabolic process|GO:0007275,multicellular organism development|GO:0044699,single-organism process|GO:0044…	GO:0098803,respiratory chain complex|GO:1990204,oxidoreductase complex|GO:0043229,intracellular organelle|GO:0045281,succinate dehydrogenase complex|GO:0043227,membrane-bounded organelle|GO:0043226,organelle|GO:0005737,cytoplasm|GO:0031090,organelle membrane|GO:0098796,membrane protein complex|GO:0043209,myelin sheath|GO:0016020,membrane|GO:0045283,fumarate reductase complex|GO:0044444,cytoplasmi…	GO:0043168,anion binding|GO:0050662,coenzyme binding|GO:0050660,flavin adenine dinucleotide binding|GO:0043167,ion binding|GO:0097159,organic cyclic compound binding|GO:0016627,oxidoreductase activity, acting on the CH-CH group of donors|GO:0016635,oxidoreductase activity, acting on the CH-CH group of donors, quinone or related compound as acceptor|GO:0000166,nucleotide binding|GO:0036094,small m…	hsa05012,Parkinson disease|hsa00190,Oxidative phosphorylation|hsa05010,Alzheimer disease|hsa01100,Metabolic pathways|hsa01200,Carbon metabolism|hsa00020,Citrate cycle (TCA cycle)|hsa05016,Huntington disease|hsa04714,Thermogenesis|hsa04932,Non-alcoholic fatty liver disease			http://www.uniprot.org/uniprot/P31040	False
Q9Y2J2	3.69609	1.886	Q9Y2J2	EPB41L3	GO:0008104,protein localization|GO:0048468,cell development|GO:0061024,membrane organization|GO:0007009,plasma membrane organization|GO:0030182,neuron differentiation|GO:0051651,maintenance of location in cell|GO:0071840,cellular component organization or biogenesis|GO:0070727,cellular macromolecule localization|GO:0030913,paranodal junction assembly|GO:0048869,cellular developmental process|GO:0…	GO:0098590,plasma membrane region|GO:0019898,extrinsic component of membrane|GO:0043229,intracellular organelle|GO:0043228,non-membrane-bounded organelle|GO:0045202,synapse|GO:0043226,organelle|GO:0030054,cell junction|GO:0005856,cytoskeleton|GO:0044304,main axon|GO:0042995,cell projection|GO:0098805,whole membrane|GO:0016020,membrane|GO:0044224,juxtaparanode region of axon|GO:0097458,neuron part…	GO:0005200,structural constituent of cytoskeleton|GO:0008092,cytoskeletal protein binding|GO:0005198,structural molecule activity|GO:0003779,actin binding|GO:0005488,binding|GO:0005515,protein binding	hsa04530,Tight junction			http://www.uniprot.org/uniprot/Q9Y2J2	False
Q96PU8	3.69097	1.884	Q96PU8	QKI	GO:0080090,regulation of primary metabolic process|GO:0019222,regulation of metabolic process|GO:0048468,cell development|GO:0072359,circulatory system development|GO:0072358,cardiovascular system development|GO:0044281,small molecule metabolic process|GO:0044283,small molecule biosynthetic process|GO:1901360,organic cyclic compound metabolic process|GO:0044710,single-organism metabolic process|G…	GO:0005737,cytoplasm|GO:0043231,intracellular membrane-bounded organelle|GO:0005634,nucleus|GO:0044464,cell part|GO:0005623,cell|GO:0005622,intracellular|GO:0043229,intracellular organelle|GO:0044424,intracellular part|GO:0043227,membrane-bounded organelle|GO:0043226,organelle|GO:0045202,synapse	GO:0005488,binding|GO:0005515,protein binding|GO:0097159,organic cyclic compound binding|GO:0044822,poly(A) RNA binding|GO:0017124,SH3 domain binding|GO:0003723,RNA binding|GO:0003676,nucleic acid binding|GO:1901363,heterocyclic compound binding|GO:0019904,protein domain specific binding|GO:0003729,mRNA binding				http://www.uniprot.org/uniprot/Q96PU8	False
P13667	3.66547	1.874	P13667	PDIA4	GO:0008104,protein localization|GO:0006457,protein folding|GO:0042592,homeostatic process|GO:0032940,secretion by cell|GO:0050789,regulation of biological process|GO:0044699,single-organism process|GO:0044267,cellular protein metabolic process|GO:0051716,cellular response to stimulus|GO:0044260,cellular macromolecule metabolic process|GO:0051179,localization|GO:0071704,organic substance metabolic…	GO:0005783,endoplasmic reticulum|GO:0005788,endoplasmic reticulum lumen|GO:0048770,pigment granule|GO:0031974,membrane-enclosed lumen|GO:0043229,intracellular organelle|GO:0043227,membrane-bounded organelle|GO:0043226,organelle|GO:0005737,cytoplasm|GO:0031982,vesicle|GO:0016023,cytoplasmic, membrane-bounded vesicle|GO:0031410,cytoplasmic vesicle|GO:0031988,membrane-bounded vesicle|GO:0044432,endo…	GO:0005488,binding|GO:0016853,isomerase activity|GO:0005515,protein binding|GO:0097159,organic cyclic compound binding|GO:0044822,poly(A) RNA binding|GO:0003824,catalytic activity|GO:0003756,protein disulfide isomerase activity|GO:0003676,nucleic acid binding|GO:0003723,RNA binding|GO:0016864,intramolecular oxidoreductase activity, transposing S-S bonds|GO:1901363,heterocyclic compound binding|GO…	hsa04141,Protein processing in endoplasmic reticulum|hsa05110,Vibrio cholerae infection|hsa04918,Thyroid hormone synthesis			http://www.uniprot.org/uniprot/P13667	False
Q9Y265	3.65279	1.869	Q9Y265	RUVBL1	GO:0033157,regulation of intracellular protein transport|GO:0008104,protein localization|GO:0032388,positive regulation of intracellular transport|GO:0080090,regulation of primary metabolic process|GO:0019222,regulation of metabolic process|GO:0034080,CENP-A containing nucleosome assembly|GO:0051049,regulation of transport|GO:0032386,regulation of intracellular transport|GO:0072655,establishment …	GO:0043231,intracellular membrane-bounded organelle|GO:0033202,DNA helicase complex|GO:0016020,membrane|GO:0031011,Ino80 complex|GO:0031974,membrane-enclosed lumen|GO:0043229,intracellular organelle|GO:0043228,non-membrane-bounded organelle|GO:0000785,chromatin|GO:0035267,NuA4 histone acetyltransferase complex|GO:1902562,H4 histone acetyltransferase complex|GO:0000228,nuclear chromosome|GO:000581…	GO:0035639,purine ribonucleoside triphosphate binding|GO:0005488,binding|GO:0016887,ATPase activity|GO:0003678,DNA helicase activity|GO:0043167,ion binding|GO:1901363,heterocyclic compound binding|GO:1901265,nucleoside phosphate binding|GO:0001882,nucleoside binding|GO:0043168,anion binding|GO:0000166,nucleotide binding|GO:0001883,purine nucleoside binding|GO:0032549,ribonucleoside binding|GO:001…	hsa04310,Wnt signaling pathway			http://www.uniprot.org/uniprot/Q9Y265	False
P21579	3.63763	1.863	P21579	SYT1	GO:0009593,detection of chemical stimulus|GO:0010038,response to metal ion|GO:0051046,regulation of secretion|GO:0048588,developmental cell growth|GO:0051049,regulation of transport|GO:0048468,cell development|GO:0006820,anion transport|GO:0001505,regulation of neurotransmitter levels|GO:0051641,cellular localization|GO:1903861,positive regulation of dendrite extension|GO:0051656,establishment of…	GO:0008021,synaptic vesicle|GO:0012505,endomembrane system|GO:0098590,plasma membrane region|GO:0060198,clathrin-sculpted vesicle|GO:0060199,clathrin-sculpted glutamate transport vesicle|GO:0060203,clathrin-sculpted glutamate transport vesicle membrane|GO:0060200,clathrin-sculpted acetylcholine transport vesicle|GO:0060201,clathrin-sculpted acetylcholine transport vesicle membrane|GO:0045202,syna…	GO:0048306,calcium-dependent protein binding|GO:0005488,binding|GO:0043168,anion binding|GO:0043169,cation binding|GO:0000149,SNARE binding|GO:0005543,phospholipid binding|GO:0005544,calcium-dependent phospholipid binding|GO:0005545,1-phosphatidylinositol binding|GO:0005546,phosphatidylinositol-4,5-bisphosphate binding|GO:0043167,ion binding|GO:1902936,phosphatidylinositol bisphosphate binding|GO…	hsa04721,Synaptic vesicle cycle			http://www.uniprot.org/uniprot/P21579	False
Q8TAQ2	3.6025	1.849	Q8TAQ2	SMARCC2	GO:0080090,regulation of primary metabolic process|GO:0019222,regulation of metabolic process|GO:0060322,head development|GO:1901362,organic cyclic compound biosynthetic process|GO:0071840,cellular component organization or biogenesis|GO:0010605,negative regulation of macromolecule metabolic process|GO:0010604,positive regulation of macromolecule metabolic process|GO:0048869,cellular developmenta…	GO:0031974,membrane-enclosed lumen|GO:0043229,intracellular organelle|GO:0043228,non-membrane-bounded organelle|GO:0000785,chromatin|GO:0000228,nuclear chromosome|GO:0043227,membrane-bounded organelle|GO:0043226,organelle|GO:0070603,SWI/SNF superfamily-type complex|GO:0031981,nuclear lumen|GO:0097458,neuron part|GO:0005634,nucleus|GO:0005654,nucleoplasm|GO:0044454,nuclear chromosome part|GO:00165…	GO:0001012,RNA polymerase II regulatory region DNA binding|GO:0001159,core promoter proximal region DNA binding|GO:0001158,enhancer sequence-specific DNA binding|GO:0031491,nucleosome binding|GO:0031490,chromatin DNA binding|GO:0031492,nucleosomal DNA binding|GO:0044877,macromolecular complex binding|GO:0005488,binding|GO:0003676,nucleic acid binding|GO:0003677,DNA binding|GO:1901363,heterocyclic…	hsa05225,Hepatocellular carcinoma|hsa04714,Thermogenesis			http://www.uniprot.org/uniprot/Q8TAQ2	False
P38919	3.60001	1.848	P38919	EIF4A3	GO:0019221,cytokine-mediated signaling pathway|GO:0019222,regulation of metabolic process|GO:0001501,skeletal system development|GO:0007165,signal transduction|GO:0007166,cell surface receptor signaling pathway|GO:0071840,cellular component organization or biogenesis|GO:0080090,regulation of primary metabolic process|GO:0051716,cellular response to stimulus|GO:0010605,negative regulation of macro…	GO:0035145,exon-exon junction complex|GO:0031974,membrane-enclosed lumen|GO:0043229,intracellular organelle|GO:0043227,membrane-bounded organelle|GO:0043226,organelle|GO:0016607,nuclear speck|GO:0016604,nuclear body|GO:0031981,nuclear lumen|GO:0005634,nucleus|GO:0016020,membrane|GO:0030529,intracellular ribonucleoprotein complex|GO:0005654,nucleoplasm|GO:0044451,nucleoplasm part|GO:0005737,cytopl…	GO:0016887,ATPase activity|GO:0008026,ATP-dependent helicase activity|GO:0008143,poly(A) binding|GO:0005488,binding|GO:0003676,nucleic acid binding|GO:0008186,RNA-dependent ATPase activity|GO:0043167,ion binding|GO:1901363,heterocyclic compound binding|GO:0001883,purine nucleoside binding|GO:0001882,nucleoside binding|GO:0043168,anion binding|GO:0042623,ATPase activity, coupled|GO:0000166,nucleot…	hsa03015,mRNA surveillance pathway|hsa03013,RNA transport|hsa03040,Spliceosome			http://www.uniprot.org/uniprot/P38919	False
P23470	3.59253	1.845	P23470	PTPRG	GO:0044707,single-multicellular organism process|GO:0008152,metabolic process|GO:0051234,establishment of localization|GO:0016311,dephosphorylation|GO:0006470,protein dephosphorylation|GO:0030155,regulation of cell adhesion|GO:1901998,toxin transport|GO:0035335,peptidyl-tyrosine dephosphorylation|GO:0006928,movement of cell or subcellular component|GO:0032501,multicellular organismal process|GO:0…	GO:0071944,cell periphery|GO:0031226,intrinsic component of plasma membrane|GO:0043226,organelle|GO:0031224,intrinsic component of membrane|GO:0031982,vesicle|GO:0043227,membrane-bounded organelle|GO:0016021,integral component of membrane|GO:0016020,membrane|GO:0031988,membrane-bounded vesicle|GO:0044459,plasma membrane part|GO:0005887,integral component of plasma membrane|GO:0005886,plasma membr…	GO:0042578,phosphoric ester hydrolase activity|GO:0038023,signaling receptor activity|GO:0005515,protein binding|GO:0016788,hydrolase activity, acting on ester bonds|GO:0016787,hydrolase activity|GO:0004725,protein tyrosine phosphatase activity|GO:0004721,phosphoprotein phosphatase activity|GO:0005001,transmembrane receptor protein tyrosine phosphatase activity|GO:0060089,molecular transducer act…				http://www.uniprot.org/uniprot/P23470	False
P31930	3.54062	1.824	P31930	UQCRC1	GO:0042221,response to chemical|GO:0050896,response to stimulus|GO:0051234,establishment of localization|GO:1902600,hydrogen ion transmembrane transport|GO:0009141,nucleoside triphosphate metabolic process|GO:0009144,purine nucleoside triphosphate metabolic process|GO:0009167,purine ribonucleoside monophosphate metabolic process|GO:0034641,cellular nitrogen compound metabolic process|GO:0009060,a…	GO:0044464,cell part|GO:1990204,oxidoreductase complex|GO:0043229,intracellular organelle|GO:0070069,cytochrome complex|GO:0043227,membrane-bounded organelle|GO:0043226,organelle|GO:0031224,intrinsic component of membrane|GO:0005737,cytoplasm|GO:0031090,organelle membrane|GO:0098796,membrane protein complex|GO:0043209,myelin sheath|GO:0016021,integral component of membrane|GO:0016020,membrane|GO:…	GO:0004175,endopeptidase activity|GO:0044389,ubiquitin-like protein ligase binding|GO:0008121,ubiquinol-cytochrome-c reductase activity|GO:0019899,enzyme binding|GO:0044877,macromolecular complex binding|GO:0008270,zinc ion binding|GO:0008233,peptidase activity|GO:0008237,metallopeptidase activity|GO:0016491,oxidoreductase activity|GO:0043169,cation binding|GO:0046914,transition metal ion binding…	hsa00190,Oxidative phosphorylation|hsa04714,Thermogenesis|hsa01100,Metabolic pathways|hsa04260,Cardiac muscle contraction|hsa05012,Parkinson disease|hsa05016,Huntington disease|hsa05010,Alzheimer disease|hsa04932,Non-alcoholic fatty liver disease			http://www.uniprot.org/uniprot/P31930	False
P68371	3.53816	1.823	P68371	TUBB4B	GO:0022607,cellular component assembly|GO:0006457,protein folding|GO:0044839,cell cycle G2/M phase transition|GO:0070271,protein complex biogenesis|GO:0000086,G2/M transition of mitotic cell cycle|GO:0006458,'de novo' protein folding|GO:1903047,mitotic cell cycle process|GO:0006928,movement of cell or subcellular component|GO:0044770,cell cycle phase transition|GO:0044772,mitotic cell cycle phase…	GO:0043229,intracellular organelle|GO:0043228,non-membrane-bounded organelle|GO:0005874,microtubule|GO:0043226,organelle|GO:0005856,cytoskeleton|GO:0031982,vesicle|GO:0043209,myelin sheath|GO:0043227,membrane-bounded organelle|GO:0005634,nucleus|GO:0031988,membrane-bounded vesicle|GO:0044430,cytoskeletal part|GO:0005737,cytoplasm|GO:0015630,microtubule cytoskeleton|GO:0032991,macromolecular compl…	GO:0005200,structural constituent of cytoskeleton|GO:0035639,purine ribonucleoside triphosphate binding|GO:0005488,binding|GO:0003676,nucleic acid binding|GO:0000166,nucleotide binding|GO:1901363,heterocyclic compound binding|GO:0001883,purine nucleoside binding|GO:0001882,nucleoside binding|GO:0043168,anion binding|GO:0016462,pyrophosphatase activity|GO:0051082,unfolded protein binding|GO:000519…	hsa05130,Pathogenic Escherichia coli infection|hsa04145,Phagosome|hsa04540,Gap junction		D00491,Paclitaxel (JAN/USP/INN); Abraxane (TN); Taxol (TN)|D00570,Colchicine (JP16/USP); Colchicine (TN)|D01068,Vinblastine sulfate (JP16/USP); Exal (TN); Velban (TN)|D01769,Vindesine sulfate (JAN/USAN); Fildesin (TN)|D01935,Vinorelbine ditartrate (JAN); Vinorelbine tartrate (USP); KW 2307; Navelbine (TN)|D02165,Docetaxel hydrate (JP16); Docetaxel (USAN); Docetaxel injection (JP16); Docetaxel for…	http://www.uniprot.org/uniprot/P68371	False
P38646	3.52837	1.819	P38646	HSPA9	GO:0051169,nuclear transport|GO:0051168,nuclear export|GO:0006457,protein folding|GO:0006611,protein export from nucleus|GO:0009636,response to toxic substance|GO:0051649,establishment of localization in cell|GO:0008104,protein localization|GO:0070887,cellular response to chemical stimulus|GO:0050896,response to stimulus|GO:0008219,cell death|GO:0010941,regulation of cell death|GO:0042981,regulat…	GO:0031974,membrane-enclosed lumen|GO:0043229,intracellular organelle|GO:0043228,non-membrane-bounded organelle|GO:0005924,cell-substrate adherens junction|GO:0042645,mitochondrial nucleoid|GO:0043227,membrane-bounded organelle|GO:0043226,organelle|GO:0030054,cell junction|GO:0030055,cell-substrate junction|GO:0005737,cytoplasm|GO:0005925,focal adhesion|GO:0070062,extracellular exosome|GO:0031981…	GO:0044389,ubiquitin-like protein ligase binding|GO:0035639,purine ribonucleoside triphosphate binding|GO:0031072,heat shock protein binding|GO:0019899,enzyme binding|GO:0005488,binding|GO:0003676,nucleic acid binding|GO:0000166,nucleotide binding|GO:1901363,heterocyclic compound binding|GO:1901265,nucleoside phosphate binding|GO:0001882,nucleoside binding|GO:0043168,anion binding|GO:0019838,grow…	hsa03018,RNA degradation|hsa05152,Tuberculosis			http://www.uniprot.org/uniprot/P38646	False
P31689	3.48945	1.803	P31689	DNAJA1	GO:0043549,regulation of kinase activity|GO:0019220,regulation of phosphate metabolic process|GO:0080090,regulation of primary metabolic process|GO:0019222,regulation of metabolic process|GO:0051049,regulation of transport|GO:0048585,negative regulation of response to stimulus|GO:0048583,regulation of response to stimulus|GO:0008104,protein localization|GO:0042769,DNA damage response, detection o…	GO:0005783,endoplasmic reticulum|GO:0005789,endoplasmic reticulum membrane|GO:0042175,nuclear outer membrane-endoplasmic reticulum membrane network|GO:0043229,intracellular organelle|GO:0098552,side of membrane|GO:0043227,membrane-bounded organelle|GO:0043226,organelle|GO:0005737,cytoplasm|GO:0031982,vesicle|GO:0005634,nucleus|GO:0016020,membrane|GO:0005739,mitochondrion|GO:0031988,membrane-bound…	GO:0044389,ubiquitin-like protein ligase binding|GO:0035639,purine ribonucleoside triphosphate binding|GO:0031072,heat shock protein binding|GO:0019899,enzyme binding|GO:0005488,binding|GO:0001664,G-protein coupled receptor binding|GO:0000166,nucleotide binding|GO:1901363,heterocyclic compound binding|GO:1901265,nucleoside phosphate binding|GO:0001882,nucleoside binding|GO:0043168,anion binding|G…	hsa04141,Protein processing in endoplasmic reticulum			http://www.uniprot.org/uniprot/P31689	False
P27144	3.47497	1.797	P27144	AK4	GO:0009167,purine ribonucleoside monophosphate metabolic process|GO:0009165,nucleotide biosynthetic process|GO:0009163,nucleoside biosynthetic process|GO:0009161,ribonucleoside monophosphate metabolic process|GO:1901362,organic cyclic compound biosynthetic process|GO:0042451,purine nucleoside biosynthetic process|GO:0009168,purine ribonucleoside monophosphate biosynthetic process|GO:0044710,singl…	GO:0031974,membrane-enclosed lumen|GO:0043229,intracellular organelle|GO:0043227,membrane-bounded organelle|GO:0043226,organelle|GO:0005737,cytoplasm|GO:0070062,extracellular exosome|GO:0005739,mitochondrion|GO:0031988,membrane-bounded vesicle|GO:0005759,mitochondrial matrix|GO:1903561,extracellular vesicle|GO:0031982,vesicle|GO:0043230,extracellular organelle|GO:0043231,intracellular membrane-bo…	GO:0019201,nucleotide kinase activity|GO:0019205,nucleobase-containing compound kinase activity|GO:0035639,purine ribonucleoside triphosphate binding|GO:0004017,adenylate kinase activity|GO:0005488,binding|GO:0043167,ion binding|GO:1901363,heterocyclic compound binding|GO:0001883,purine nucleoside binding|GO:0001882,nucleoside binding|GO:0043168,anion binding|GO:0000166,nucleotide binding|GO:0032…	hsa00730,Thiamine metabolism|hsa01100,Metabolic pathways|hsa00230,Purine metabolism			http://www.uniprot.org/uniprot/P27144	False
Q5SSJ5	3.42713	1.777	Q5SSJ5	HP1BP3	GO:0009628,response to abiotic stimulus|GO:0080090,regulation of primary metabolic process|GO:0019222,regulation of metabolic process|GO:1901362,organic cyclic compound biosynthetic process|GO:1901360,organic cyclic compound metabolic process|GO:0051716,cellular response to stimulus|GO:0042127,regulation of cell proliferation|GO:0060255,regulation of macromolecule metabolic process|GO:0065004,pro…	GO:0044815,DNA packaging complex|GO:0043229,intracellular organelle|GO:0043228,non-membrane-bounded organelle|GO:0000785,chromatin|GO:0000786,nucleosome|GO:0043227,membrane-bounded organelle|GO:0043226,organelle|GO:0005634,nucleus|GO:0005694,chromosome|GO:0043234,protein complex|GO:0032991,macromolecular complex|GO:0043231,intracellular membrane-bounded organelle|GO:0043232,intracellular non-memb…	GO:0005515,protein binding|GO:0097159,organic cyclic compound binding|GO:0031491,nucleosome binding|GO:0044877,macromolecular complex binding|GO:0005488,binding|GO:0003676,nucleic acid binding|GO:0003677,DNA binding|GO:0032403,protein complex binding|GO:0003682,chromatin binding|GO:1901363,heterocyclic compound binding				http://www.uniprot.org/uniprot/Q5SSJ5	False
P17050	3.41764	1.773	P17050	NAGA	GO:0016137,glycoside metabolic process|GO:0030149,sphingolipid catabolic process|GO:0016139,glycoside catabolic process|GO:0044248,cellular catabolic process|GO:0034641,cellular nitrogen compound metabolic process|GO:0006807,nitrogen compound metabolic process|GO:0044242,cellular lipid catabolic process|GO:0044699,single-organism process|GO:0006629,lipid metabolic process|GO:0044712,single-organi…	GO:0000323,lytic vacuole|GO:0043229,intracellular organelle|GO:0043227,membrane-bounded organelle|GO:0043226,organelle|GO:0005737,cytoplasm|GO:0031982,vesicle|GO:0005773,vacuole|GO:0031988,membrane-bounded vesicle|GO:1903561,extracellular vesicle|GO:0070062,extracellular exosome|GO:0043230,extracellular organelle|GO:0043231,intracellular membrane-bounded organelle|GO:0044464,cell part|GO:0005623,…	GO:0016787,hydrolase activity|GO:0015925,galactosidase activity|GO:0008456,alpha-N-acetylgalactosaminidase activity|GO:0016798,hydrolase activity, acting on glycosyl bonds|GO:0015929,hexosaminidase activity|GO:0003824,catalytic activity|GO:0004557,alpha-galactosidase activity|GO:0005488,binding|GO:0005515,protein binding|GO:0004553,hydrolase activity, hydrolyzing O-glycosyl compounds|GO:0046983,p…	hsa01100,Metabolic pathways|hsa04142,Lysosome|hsa00603,Glycosphingolipid biosynthesis - globo and isoglobo series			http://www.uniprot.org/uniprot/P17050	False
O43670	3.41054	1.77	O43670	ZNF207	GO:0080090,regulation of primary metabolic process|GO:0032434,regulation of proteasomal ubiquitin-dependent protein catabolic process|GO:0032435,negative regulation of proteasomal ubiquitin-dependent protein catabolic process|GO:0044257,cellular protein catabolic process|GO:0000280,nuclear division|GO:0010965,regulation of mitotic sister chromatid separation|GO:1901362,organic cyclic compound bio…	GO:0031974,membrane-enclosed lumen|GO:0043229,intracellular organelle|GO:0043228,non-membrane-bounded organelle|GO:0005874,microtubule|GO:0043226,organelle|GO:0005856,cytoskeleton|GO:0031981,nuclear lumen|GO:0005730,nucleolus|GO:0043227,membrane-bounded organelle|GO:0005634,nucleus|GO:0044430,cytoskeletal part|GO:0000776,kinetochore|GO:0005694,chromosome|GO:0015630,microtubule cytoskeleton|GO:000…	GO:0044877,macromolecular complex binding|GO:0008270,zinc ion binding|GO:0003676,nucleic acid binding|GO:0003677,DNA binding|GO:1901363,heterocyclic compound binding|GO:1901681,sulfur compound binding|GO:0043169,cation binding|GO:0046914,transition metal ion binding|GO:0043167,ion binding|GO:0032403,protein complex binding|GO:0046872,metal ion binding|GO:0044822,poly(A) RNA binding|GO:0043168,ani…				http://www.uniprot.org/uniprot/O43670	False
O94905	3.4011	1.766	O94905	ERLIN2	GO:0080090,regulation of primary metabolic process|GO:0019222,regulation of metabolic process|GO:0007165,signal transduction|GO:0044283,small molecule biosynthetic process|GO:1901576,organic substance biosynthetic process|GO:1901362,organic cyclic compound biosynthetic process|GO:1901360,organic cyclic compound metabolic process|GO:0044712,single-organism catabolic process|GO:0006984,ER-nucleus s…	GO:0005783,endoplasmic reticulum|GO:0044421,extracellular region part|GO:0005789,endoplasmic reticulum membrane|GO:0042175,nuclear outer membrane-endoplasmic reticulum membrane network|GO:0043229,intracellular organelle|GO:0071944,cell periphery|GO:0043227,membrane-bounded organelle|GO:0043226,organelle|GO:0031224,intrinsic component of membrane|GO:0005737,cytoplasm|GO:0031982,vesicle|GO:0016021,…	GO:0031625,ubiquitin protein ligase binding|GO:0044389,ubiquitin-like protein ligase binding|GO:0019899,enzyme binding|GO:0005488,binding|GO:0005515,protein binding|GO:0032934,sterol binding|GO:0015485,cholesterol binding|GO:0043178,alcohol binding|GO:0016773,phosphotransferase activity, alcohol group as acceptor|GO:0016772,transferase activity, transferring phosphorus-containing groups|GO:001630…				http://www.uniprot.org/uniprot/O94905	False
P51991	3.37292	1.754	P51991	HNRNPA3	GO:0015931,nucleobase-containing compound transport|GO:0090304,nucleic acid metabolic process|GO:0034641,cellular nitrogen compound metabolic process|GO:0006807,nitrogen compound metabolic process|GO:0044237,cellular metabolic process|GO:0051028,mRNA transport|GO:1901360,organic cyclic compound metabolic process|GO:0006139,nucleobase-containing compound metabolic process|GO:0044260,cellular macro…	GO:0035770,ribonucleoprotein granule|GO:0031974,membrane-enclosed lumen|GO:0043229,intracellular organelle|GO:0043228,non-membrane-bounded organelle|GO:0043227,membrane-bounded organelle|GO:0043226,organelle|GO:0005737,cytoplasm|GO:0031981,nuclear lumen|GO:0005634,nucleus|GO:0030529,intracellular ribonucleoprotein complex|GO:0005654,nucleoplasm|GO:0097458,neuron part|GO:0043005,neuron projection|…	GO:0022891,substrate-specific transmembrane transporter activity|GO:0015932,nucleobase-containing compound transmembrane transporter activity|GO:0022892,substrate-specific transporter activity|GO:0005515,protein binding|GO:0022884,macromolecule transmembrane transporter activity|GO:0005215,transporter activity|GO:0044822,poly(A) RNA binding|GO:0022857,transmembrane transporter activity|GO:0000166…	hsa03040,Spliceosome			http://www.uniprot.org/uniprot/P51991	False
O43143	3.35893	1.748	O43143	DHX15	GO:0016070,RNA metabolic process|GO:0016071,mRNA metabolic process|GO:0044238,primary metabolic process|GO:0044260,cellular macromolecule metabolic process|GO:0006139,nucleobase-containing compound metabolic process|GO:0009987,cellular process|GO:0006725,cellular aromatic compound metabolic process|GO:0010467,gene expression|GO:0044237,cellular metabolic process|GO:0043170,macromolecule metabolic…	GO:0071008,U2-type post-mRNA release spliceosomal complex|GO:0031974,membrane-enclosed lumen|GO:0043229,intracellular organelle|GO:0043228,non-membrane-bounded organelle|GO:0043227,membrane-bounded organelle|GO:0043226,organelle|GO:0005737,cytoplasm|GO:0031981,nuclear lumen|GO:0005730,nucleolus|GO:0005634,nucleus|GO:0030529,intracellular ribonucleoprotein complex|GO:0005654,nucleoplasm|GO:0071014…	GO:0016887,ATPase activity|GO:0008026,ATP-dependent helicase activity|GO:0035639,purine ribonucleoside triphosphate binding|GO:0005488,binding|GO:0003676,nucleic acid binding|GO:0008186,RNA-dependent ATPase activity|GO:0043167,ion binding|GO:1901363,heterocyclic compound binding|GO:0001883,purine nucleoside binding|GO:0001882,nucleoside binding|GO:0043168,anion binding|GO:0042623,ATPase activity,…	hsa03040,Spliceosome			http://www.uniprot.org/uniprot/O43143	False
Q53H12	3.33341	1.737	Q53H12	AGK	GO:0016310,phosphorylation|GO:0044249,cellular biosynthetic process|GO:0034641,cellular nitrogen compound metabolic process|GO:0006807,nitrogen compound metabolic process|GO:0046486,glycerolipid metabolic process|GO:0044699,single-organism process|GO:0006629,lipid metabolic process|GO:1901576,organic substance biosynthetic process|GO:0044710,single-organism metabolic process|GO:0044711,single-org…	GO:0005737,cytoplasm|GO:0005622,intracellular|GO:0043231,intracellular membrane-bounded organelle|GO:0005623,cell|GO:0043227,membrane-bounded organelle|GO:0016020,membrane|GO:0044444,cytoplasmic part|GO:0043229,intracellular organelle|GO:0005739,mitochondrion|GO:0031966,mitochondrial membrane|GO:0044446,intracellular organelle part|GO:0005740,mitochondrial envelope|GO:0044429,mitochondrial part|G…	GO:0035639,purine ribonucleoside triphosphate binding|GO:0047620,acylglycerol kinase activity|GO:0005488,binding|GO:0043167,ion binding|GO:1901363,heterocyclic compound binding|GO:0001883,purine nucleoside binding|GO:0001882,nucleoside binding|GO:0043168,anion binding|GO:0001727,lipid kinase activity|GO:0001729,ceramide kinase activity|GO:0000166,nucleotide binding|GO:0016740,transferase activity…	hsa00561,Glycerolipid metabolism|hsa01100,Metabolic pathways			http://www.uniprot.org/uniprot/Q53H12	False
Q13620	3.31268	1.728	Q13620	CUL4B	GO:0080090,regulation of primary metabolic process|GO:0019222,regulation of metabolic process|GO:0010390,histone monoubiquitination|GO:0048468,cell development|GO:0042769,DNA damage response, detection of DNA damage|GO:1901576,organic substance biosynthetic process|GO:1901362,organic cyclic compound biosynthetic process|GO:0071840,cellular component organization or biogenesis|GO:0044710,single-or…	GO:0031974,membrane-enclosed lumen|GO:0043229,intracellular organelle|GO:0071944,cell periphery|GO:0043227,membrane-bounded organelle|GO:0043226,organelle|GO:0005737,cytoplasm|GO:0070062,extracellular exosome|GO:0031981,nuclear lumen|GO:0005634,nucleus|GO:0016020,membrane|GO:0031988,membrane-bounded vesicle|GO:0005654,nucleoplasm|GO:0032991,macromolecular complex|GO:1902494,catalytic complex|GO:1…	GO:0019787,ubiquitin-like protein transferase activity|GO:0031625,ubiquitin protein ligase binding|GO:0044389,ubiquitin-like protein ligase binding|GO:0005515,protein binding|GO:0061630,ubiquitin protein ligase activity|GO:0019899,enzyme binding|GO:1901363,heterocyclic compound binding|GO:0003824,catalytic activity|GO:0016740,transferase activity|GO:0005488,binding|GO:0003676,nucleic acid binding…	hsa04120,Ubiquitin mediated proteolysis|hsa05170,Human immunodeficiency virus 1 infection|hsa03420,Nucleotide excision repair			http://www.uniprot.org/uniprot/Q13620	False
P62911	3.27615	1.712	P62911	P62911							http://www.uniprot.org/uniprot/P62911	False
O94776	3.24676	1.699	O94776	MTA2	GO:0080090,regulation of primary metabolic process|GO:0019222,regulation of metabolic process|GO:0006476,protein deacetylation|GO:1901362,organic cyclic compound biosynthetic process|GO:0071840,cellular component organization or biogenesis|GO:0006306,DNA methylation|GO:0044710,single-organism metabolic process|GO:0006304,DNA modification|GO:0010605,negative regulation of macromolecule metabolic p…	GO:0031974,membrane-enclosed lumen|GO:0043229,intracellular organelle|GO:0043228,non-membrane-bounded organelle|GO:0000785,chromatin|GO:0000228,nuclear chromosome|GO:0043227,membrane-bounded organelle|GO:0043226,organelle|GO:0070603,SWI/SNF superfamily-type complex|GO:0031981,nuclear lumen|GO:0005634,nucleus|GO:0016020,membrane|GO:0005654,nucleoplasm|GO:0044454,nuclear chromosome part|GO:0044451,…	GO:0001012,RNA polymerase II regulatory region DNA binding|GO:0001159,core promoter proximal region DNA binding|GO:0001158,enhancer sequence-specific DNA binding|GO:0031491,nucleosome binding|GO:0031490,chromatin DNA binding|GO:0031492,nucleosomal DNA binding|GO:0044877,macromolecular complex binding|GO:0008270,zinc ion binding|GO:0003676,nucleic acid binding|GO:0003677,DNA binding|GO:1901363,het…				http://www.uniprot.org/uniprot/O94776	False
B4E2U0	3.22657	1.69	B4E2U0	B4E2U0	GO:0006739,NADP metabolic process|GO:0006732,coenzyme metabolic process|GO:0006733,oxidoreduction coenzyme metabolic process|GO:0019752,carboxylic acid metabolic process|GO:0043436,oxoacid metabolic process|GO:0034641,cellular nitrogen compound metabolic process|GO:0006098,pentose-phosphate shunt|GO:0046496,nicotinamide nucleotide metabolic process|GO:0072524,pyridine-containing compound metaboli…		GO:0016614,oxidoreductase activity, acting on CH-OH group of donors|GO:0016616,oxidoreductase activity, acting on the CH-OH group of donors, NAD or NADP as acceptor|GO:0003824,catalytic activity|GO:0004616,phosphogluconate dehydrogenase (decarboxylating) activity|GO:0016491,oxidoreductase activity				http://www.uniprot.org/uniprot/B4E2U0	False
P45880	3.22433	1.689	P45880	VDAC2	GO:2001234,negative regulation of apoptotic signaling pathway|GO:0022607,cellular component assembly|GO:0006461,protein complex assembly|GO:0051234,establishment of localization|GO:2001233,regulation of apoptotic signaling pathway|GO:0043933,macromolecular complex subunit organization|GO:0051049,regulation of transport|GO:0048585,negative regulation of response to stimulus|GO:0034622,cellular mac…	GO:0098796,membrane protein complex|GO:0044421,extracellular region part|GO:0044464,cell part|GO:0031974,membrane-enclosed lumen|GO:0031975,envelope|GO:0043229,intracellular organelle|GO:0043228,non-membrane-bounded organelle|GO:0042645,mitochondrial nucleoid|GO:0043227,membrane-bounded organelle|GO:0043226,organelle|GO:0031224,intrinsic component of membrane|GO:0005737,cytoplasm|GO:0046930,pore …	GO:0015288,porin activity|GO:0005488,binding|GO:0022838,substrate-specific channel activity|GO:1901363,heterocyclic compound binding|GO:1901265,nucleoside phosphate binding|GO:0008509,anion transmembrane transporter activity|GO:0000166,nucleotide binding|GO:0022829,wide pore channel activity|GO:0022803,passive transmembrane transporter activity|GO:0005253,anion channel activity|GO:0005215,transpo…	hsa04022,cGMP-PKG signaling pathway|hsa04979,Cholesterol metabolism|hsa04020,Calcium signaling pathway|hsa04621,NOD-like receptor signaling pathway|hsa04218,Cellular senescence|hsa05012,Parkinson disease|hsa05016,Huntington disease|hsa05166,Human T-cell leukemia virus 1 infection|hsa04217,Necroptosis|hsa04216,Ferroptosis			http://www.uniprot.org/uniprot/P45880	False
P60174	3.19541	1.676	P60174	TPI1	GO:0009167,purine ribonucleoside monophosphate metabolic process|GO:0061621,canonical glycolysis|GO:0061620,glycolytic process through glucose-6-phosphate|GO:0044281,small molecule metabolic process|GO:0009161,ribonucleoside monophosphate metabolic process|GO:1901360,organic cyclic compound metabolic process|GO:0044712,single-organism catabolic process|GO:0044710,single-organism metabolic process…	GO:0043229,intracellular organelle|GO:0043227,membrane-bounded organelle|GO:0043226,organelle|GO:0005737,cytoplasm|GO:0031982,vesicle|GO:0005634,nucleus|GO:0031988,membrane-bounded vesicle|GO:1903561,extracellular vesicle|GO:0005615,extracellular space|GO:0043230,extracellular organelle|GO:0043231,intracellular membrane-bounded organelle|GO:0070062,extracellular exosome|GO:0005829,cytosol|GO:0044…	GO:0031625,ubiquitin protein ligase binding|GO:0044389,ubiquitin-like protein ligase binding|GO:0016853,isomerase activity|GO:0019899,enzyme binding|GO:0003824,catalytic activity|GO:0005488,binding|GO:0005515,protein binding|GO:0016860,intramolecular oxidoreductase activity|GO:0016861,intramolecular oxidoreductase activity, interconverting aldoses and ketoses|GO:0004807,triose-phosphate isomerase…	hsa00562,Inositol phosphate metabolism|hsa01100,Metabolic pathways|hsa01200,Carbon metabolism|hsa00051,Fructose and mannose metabolism|hsa01230,Biosynthesis of amino acids|hsa00010,Glycolysis / Gluconeogenesis			http://www.uniprot.org/uniprot/P60174	False
Q08380	3.18877	1.673	Q08380	LGALS3BP	GO:0006968,cellular defense response|GO:0023052,signaling|GO:0007165,signal transduction|GO:0050789,regulation of biological process|GO:0044699,single-organism process|GO:0051716,cellular response to stimulus|GO:0065007,biological regulation|GO:0022610,biological adhesion|GO:0006810,transport|GO:0009987,cellular process|GO:0050794,regulation of cellular process|GO:0006952,defense response|GO:0006…	GO:0043230,extracellular organelle|GO:0070062,extracellular exosome|GO:0044421,extracellular region part|GO:0043227,membrane-bounded organelle|GO:0016020,membrane|GO:0072562,blood microparticle|GO:0031012,extracellular matrix|GO:0043226,organelle|GO:0005576,extracellular region|GO:0005615,extracellular space|GO:0031988,membrane-bounded vesicle|GO:1903561,extracellular vesicle|GO:0065010,extracell…	GO:0005044,scavenger receptor activity|GO:0038024,cargo receptor activity|GO:0004872,receptor activity|GO:0060089,molecular transducer activity|GO:0005488,binding|GO:0005515,protein binding				http://www.uniprot.org/uniprot/Q08380	False
V9HW95	3.16674	1.663	V9HW95	HEL-S-84		GO:0005737,cytoplasm|GO:0005783,endoplasmic reticulum|GO:0044464,cell part|GO:0043229,intracellular organelle|GO:0005623,cell|GO:0005622,intracellular|GO:0044444,cytoplasmic part|GO:0012505,endomembrane system|GO:0044424,intracellular part|GO:0043227,membrane-bounded organelle|GO:0043226,organelle|GO:0043231,intracellular membrane-bounded organelle	GO:0043169,cation binding|GO:0043167,ion binding|GO:0005488,binding|GO:0046872,metal ion binding|GO:0005509,calcium ion binding				http://www.uniprot.org/uniprot/V9HW95	False
P60900	3.16455	1.662	P60900	PSMA6	GO:0080090,regulation of primary metabolic process|GO:0019222,regulation of metabolic process|GO:0002479,antigen processing and presentation of exogenous peptide antigen via MHC class I, TAP-dependent|GO:0048585,negative regulation of response to stimulus|GO:0048584,positive regulation of response to stimulus|GO:0048583,regulation of response to stimulus|GO:0031349,positive regulation of defense …	GO:0035770,ribonucleoprotein granule|GO:0019773,proteasome core complex, alpha-subunit complex|GO:0031974,membrane-enclosed lumen|GO:0030016,myofibril|GO:0030017,sarcomere|GO:0043229,intracellular organelle|GO:0043228,non-membrane-bounded organelle|GO:0036464,cytoplasmic ribonucleoprotein granule|GO:0030529,intracellular ribonucleoprotein complex|GO:0043227,membrane-bounded organelle|GO:0043226,o…	GO:0043168,anion binding|GO:0016787,hydrolase activity|GO:0004175,endopeptidase activity|GO:0005515,protein binding|GO:0035639,purine ribonucleoside triphosphate binding|GO:0097159,organic cyclic compound binding|GO:0008134,transcription factor binding|GO:0051059,NF-kappaB binding|GO:0004298,threonine-type endopeptidase activity|GO:0003824,catalytic activity|GO:0070003,threonine-type peptidase ac…	hsa03050,Proteasome			http://www.uniprot.org/uniprot/P60900	False
A0A7I2V621	3.13616	1.649	A0A7I2V621	A0A7I2V621	GO:0080090,regulation of primary metabolic process|GO:0019222,regulation of metabolic process|GO:0031323,regulation of cellular metabolic process|GO:0090304,nucleic acid metabolic process|GO:0034641,cellular nitrogen compound metabolic process|GO:0006807,nitrogen compound metabolic process|GO:0043170,macromolecule metabolic process|GO:0050789,regulation of biological process|GO:1901360,organic cy…	GO:0043231,intracellular membrane-bounded organelle|GO:0005634,nucleus|GO:0044464,cell part|GO:0005623,cell|GO:0005622,intracellular|GO:0043229,intracellular organelle|GO:0044424,intracellular part|GO:0043227,membrane-bounded organelle|GO:0043226,organelle	GO:0097159,organic cyclic compound binding|GO:0005488,binding|GO:0003676,nucleic acid binding|GO:1901363,heterocyclic compound binding|GO:0003723,RNA binding				http://www.uniprot.org/uniprot/A0A7I2V621	False
A0A0K0K1K7	3.10157	1.633	A0A0K0K1K7	HEL-S-304	GO:0006739,NADP metabolic process|GO:0006732,coenzyme metabolic process|GO:0006733,oxidoreduction coenzyme metabolic process|GO:0034641,cellular nitrogen compound metabolic process|GO:0006098,pentose-phosphate shunt|GO:0046496,nicotinamide nucleotide metabolic process|GO:0072524,pyridine-containing compound metabolic process|GO:0044699,single-organism process|GO:0006139,nucleobase-containing comp…		GO:0016787,hydrolase activity|GO:0017057,6-phosphogluconolactonase activity|GO:0016788,hydrolase activity, acting on ester bonds|GO:0003824,catalytic activity|GO:0052689,carboxylic ester hydrolase activity				http://www.uniprot.org/uniprot/A0A0K0K1K7	False
B3KU66	3.06524	1.616	B3KU66	B3KU66			GO:0035639,purine ribonucleoside triphosphate binding|GO:0005488,binding|GO:0000166,nucleotide binding|GO:1901363,heterocyclic compound binding|GO:1901265,nucleoside phosphate binding|GO:0043168,anion binding|GO:0043167,ion binding|GO:0017076,purine nucleotide binding|GO:0005524,ATP binding|GO:0016787,hydrolase activity|GO:0017111,nucleoside-triphosphatase activity|GO:0004386,helicase activity|GO…				http://www.uniprot.org/uniprot/B3KU66	False
Q9BRL6	3.06524	1.616	Q9BRL6	SRSF8	GO:0016070,RNA metabolic process|GO:0016071,mRNA metabolic process|GO:0044238,primary metabolic process|GO:0044260,cellular macromolecule metabolic process|GO:0006139,nucleobase-containing compound metabolic process|GO:0009987,cellular process|GO:0006725,cellular aromatic compound metabolic process|GO:0010467,gene expression|GO:0044237,cellular metabolic process|GO:0043170,macromolecule metabolic…	GO:0043231,intracellular membrane-bounded organelle|GO:0005634,nucleus|GO:0044464,cell part|GO:0005623,cell|GO:0005622,intracellular|GO:0043229,intracellular organelle|GO:0044424,intracellular part|GO:0043227,membrane-bounded organelle|GO:0043226,organelle|GO:0031974,membrane-enclosed lumen|GO:0016607,nuclear speck|GO:0016604,nuclear body|GO:0031981,nuclear lumen|GO:0005654,nucleoplasm|GO:0044451…	GO:0005515,protein binding|GO:0097159,organic cyclic compound binding|GO:0044822,poly(A) RNA binding|GO:0000166,nucleotide binding|GO:0036094,small molecule binding|GO:0003723,RNA binding|GO:0003676,nucleic acid binding|GO:1901363,heterocyclic compound binding|GO:1901265,nucleoside phosphate binding|GO:0005488,binding	hsa05168,Herpes simplex virus 1 infection|hsa03040,Spliceosome			http://www.uniprot.org/uniprot/Q9BRL6	False
Q9UHD8	3.05463	1.611	Q9UHD8	SEPTIN9	GO:0051259,protein oligomerization|GO:0007049,cell cycle|GO:0022607,cellular component assembly|GO:0071822,protein complex subunit organization|GO:0070271,protein complex biogenesis|GO:0043933,macromolecular complex subunit organization|GO:0071840,cellular component organization or biogenesis|GO:0006461,protein complex assembly|GO:0051291,protein heterooligomerization|GO:0016043,cellular componen…	GO:0032432,actin filament bundle|GO:0015629,actin cytoskeleton|GO:0043229,intracellular organelle|GO:0043228,non-membrane-bounded organelle|GO:0005874,microtubule|GO:0043226,organelle|GO:0042641,actomyosin|GO:0005856,cytoskeleton|GO:0001725,stress fiber|GO:0044430,cytoskeletal part|GO:0048471,perinuclear region of cytoplasm|GO:0005737,cytoplasm|GO:0015630,microtubule cytoskeleton|GO:0043234,prote…	GO:0035639,purine ribonucleoside triphosphate binding|GO:0005488,binding|GO:0043167,ion binding|GO:1901363,heterocyclic compound binding|GO:1901265,nucleoside phosphate binding|GO:0001882,nucleoside binding|GO:0043168,anion binding|GO:0016462,pyrophosphatase activity|GO:0000166,nucleotide binding|GO:0032561,guanyl ribonucleotide binding|GO:0001883,purine nucleoside binding|GO:0032549,ribonucleosi…	hsa05100,Bacterial invasion of epithelial cells			http://www.uniprot.org/uniprot/Q9UHD8	False
Q9Y2W1	3.05252	1.61	Q9Y2W1	THRAP3	GO:0080090,regulation of primary metabolic process|GO:0019222,regulation of metabolic process|GO:0050685,positive regulation of mRNA processing|GO:0050684,regulation of mRNA processing|GO:2001141,regulation of RNA biosynthetic process|GO:0007165,signal transduction|GO:1901362,organic cyclic compound biosynthetic process|GO:1901360,organic cyclic compound metabolic process|GO:1901361,organic cycli…	GO:0035145,exon-exon junction complex|GO:0031974,membrane-enclosed lumen|GO:0043229,intracellular organelle|GO:0016592,mediator complex|GO:0043227,membrane-bounded organelle|GO:0043226,organelle|GO:0070062,extracellular exosome|GO:0031981,nuclear lumen|GO:0005634,nucleus|GO:0031988,membrane-bounded vesicle|GO:0005654,nucleoplasm|GO:0044451,nucleoplasm part|GO:0032991,macromolecular complex|GO:190…	GO:0017076,purine nucleotide binding|GO:0035639,purine ribonucleoside triphosphate binding|GO:0060089,molecular transducer activity|GO:0001104,RNA polymerase II transcription cofactor activity|GO:0004872,receptor activity|GO:0003676,nucleic acid binding|GO:0003677,DNA binding|GO:0043167,ion binding|GO:1901363,heterocyclic compound binding|GO:0001883,purine nucleoside binding|GO:0001882,nucleoside…				http://www.uniprot.org/uniprot/Q9Y2W1	False
Q99798	3.03564	1.602	Q99798	ACO2	GO:0019752,carboxylic acid metabolic process|GO:0006099,tricarboxylic acid cycle|GO:0009060,aerobic respiration|GO:0044281,small molecule metabolic process|GO:0006091,generation of precursor metabolites and energy|GO:0072350,tricarboxylic acid metabolic process|GO:0044699,single-organism process|GO:0044710,single-organism metabolic process|GO:0071704,organic substance metabolic process|GO:0045333…	GO:0005737,cytoplasm|GO:0043231,intracellular membrane-bounded organelle|GO:0043233,organelle lumen|GO:0043209,myelin sheath|GO:0005634,nucleus|GO:0044464,cell part|GO:0044444,cytoplasmic part|GO:0031974,membrane-enclosed lumen|GO:0005622,intracellular|GO:0044446,intracellular organelle part|GO:0070013,intracellular organelle lumen|GO:0043229,intracellular organelle|GO:0005739,mitochondrion|GO:00…	GO:0043169,cation binding|GO:0051538,3 iron, 4 sulfur cluster binding|GO:0051539,4 iron, 4 sulfur cluster binding|GO:0046914,transition metal ion binding|GO:0016835,carbon-oxygen lyase activity|GO:0016836,hydro-lyase activity|GO:0043167,ion binding|GO:0003824,catalytic activity|GO:0005488,binding|GO:0051536,iron-sulfur cluster binding|GO:0003994,aconitate hydratase activity|GO:0005506,iron ion bi…	hsa01100,Metabolic pathways|hsa00630,Glyoxylate and dicarboxylate metabolism|hsa01200,Carbon metabolism|hsa00020,Citrate cycle (TCA cycle)|hsa01230,Biosynthesis of amino acids|hsa01210,2-Oxocarboxylic acid metabolism			http://www.uniprot.org/uniprot/Q99798	False
P18859	2.98763	1.579	P18859	ATP5PF	GO:0009167,purine ribonucleoside monophosphate metabolic process|GO:0009165,nucleotide biosynthetic process|GO:0009163,nucleoside biosynthetic process|GO:0009161,ribonucleoside monophosphate metabolic process|GO:1901362,organic cyclic compound biosynthetic process|GO:0042451,purine nucleoside biosynthetic process|GO:0009168,purine ribonucleoside monophosphate biosynthetic process|GO:0044710,singl…	GO:0044464,cell part|GO:0031975,envelope|GO:0043229,intracellular organelle|GO:0043227,membrane-bounded organelle|GO:0043226,organelle|GO:0005737,cytoplasm|GO:0045263,proton-transporting ATP synthase complex, coupling factor F(o)|GO:0031090,organelle membrane|GO:0098796,membrane protein complex|GO:0016020,membrane|GO:0044444,cytoplasmic part|GO:0005739,mitochondrion|GO:0098800,inner mitochondrial…	GO:0022891,substrate-specific transmembrane transporter activity|GO:0022890,inorganic cation transmembrane transporter activity|GO:0016818,hydrolase activity, acting on acid anhydrides, in phosphorus-containing anhydrides|GO:0022892,substrate-specific transporter activity|GO:0016787,hydrolase activity|GO:0005215,transporter activity|GO:0003824,catalytic activity|GO:0008324,cation transmembrane tr…	hsa00190,Oxidative phosphorylation|hsa04714,Thermogenesis|hsa01100,Metabolic pathways|hsa05016,Huntington disease|hsa05010,Alzheimer disease|hsa05012,Parkinson disease			http://www.uniprot.org/uniprot/P18859	False
Q9Y277	2.97111	1.571	Q9Y277	VDAC3	GO:0022604,regulation of cell morphogenesis|GO:0022607,cellular component assembly|GO:0015853,adenine transport|GO:0015851,nucleobase transport|GO:0033043,regulation of organelle organization|GO:0030030,cell projection organization|GO:0051049,regulation of transport|GO:0006863,purine nucleobase transport|GO:0051128,regulation of cellular component organization|GO:0060491,regulation of cell projec…	GO:0044421,extracellular region part|GO:0031975,envelope|GO:0043229,intracellular organelle|GO:0043227,membrane-bounded organelle|GO:0043226,organelle|GO:0031224,intrinsic component of membrane|GO:0005737,cytoplasm|GO:0046930,pore complex|GO:0031982,vesicle|GO:0005634,nucleus|GO:0016020,membrane|GO:0044444,cytoplasmic part|GO:0005739,mitochondrion|GO:0031988,membrane-bounded vesicle|GO:0005576,ex…	GO:0015288,porin activity|GO:0005488,binding|GO:0022838,substrate-specific channel activity|GO:1901363,heterocyclic compound binding|GO:1901265,nucleoside phosphate binding|GO:0008509,anion transmembrane transporter activity|GO:0000166,nucleotide binding|GO:0022829,wide pore channel activity|GO:0022803,passive transmembrane transporter activity|GO:0005253,anion channel activity|GO:0005215,transpo…	hsa04022,cGMP-PKG signaling pathway|hsa04979,Cholesterol metabolism|hsa04020,Calcium signaling pathway|hsa04621,NOD-like receptor signaling pathway|hsa05203,Viral carcinogenesis|hsa04218,Cellular senescence|hsa05166,Human T-cell leukemia virus 1 infection|hsa05012,Parkinson disease|hsa05016,Huntington disease|hsa05161,Hepatitis B|hsa04217,Necroptosis|hsa04216,Ferroptosis			http://www.uniprot.org/uniprot/Q9Y277	False
P30626	2.96905	1.57	P30626	SRI	GO:0035774,positive regulation of insulin secretion involved in cellular response to glucose stimulus|GO:0032024,positive regulation of insulin secretion|GO:0051169,nuclear transport|GO:0044238,primary metabolic process|GO:0032388,positive regulation of intracellular transport|GO:1903779,regulation of cardiac conduction|GO:0035773,insulin secretion involved in cellular response to glucose stimulu…	GO:0042995,cell projection|GO:0005783,endoplasmic reticulum|GO:0044421,extracellular region part|GO:0044424,intracellular part|GO:0043679,axon terminus|GO:0043232,intracellular non-membrane-bounded organelle|GO:0031974,membrane-enclosed lumen|GO:0005789,endoplasmic reticulum membrane|GO:0030016,myofibril|GO:0030017,sarcomere|GO:0043229,intracellular organelle|GO:0043228,non-membrane-bounded organ…	GO:0004175,endopeptidase activity|GO:0019899,enzyme binding|GO:0005488,binding|GO:0044325,ion channel binding|GO:0098772,molecular function regulator|GO:0008233,peptidase activity|GO:0070491,repressing transcription factor binding|GO:0043169,cation binding|GO:0043167,ion binding|GO:0004197,cysteine-type endopeptidase activity|GO:0005509,calcium ion binding|GO:0002020,protease binding|GO:0016247,c…				http://www.uniprot.org/uniprot/P30626	False
O75822	2.9465	1.559	O75822	EIF3J	GO:0022607,cellular component assembly|GO:0080090,regulation of primary metabolic process|GO:0019222,regulation of metabolic process|GO:0043933,macromolecular complex subunit organization|GO:2000112,regulation of cellular macromolecule biosynthetic process|GO:0031323,regulation of cellular metabolic process|GO:0044249,cellular biosynthetic process|GO:0034641,cellular nitrogen compound metabolic p…	GO:0043234,protein complex|GO:0005737,cytoplasm|GO:0005852,eukaryotic translation initiation factor 3 complex|GO:0016282,eukaryotic 43S preinitiation complex|GO:0005829,cytosol|GO:0070993,translation preinitiation complex|GO:0005623,cell|GO:0030529,intracellular ribonucleoprotein complex|GO:0044444,cytoplasmic part|GO:0044424,intracellular part|GO:0033290,eukaryotic 48S preinitiation complex|GO:0…	GO:0005488,binding|GO:0003676,nucleic acid binding|GO:0097159,organic cyclic compound binding|GO:0008135,translation factor activity, RNA binding|GO:0003723,RNA binding|GO:0005515,protein binding|GO:1901363,heterocyclic compound binding|GO:0003743,translation initiation factor activity	hsa03013,RNA transport			http://www.uniprot.org/uniprot/O75822	False
Q13404	2.9302	1.551	Q13404	UBE2V1	GO:0080090,regulation of primary metabolic process|GO:0019222,regulation of metabolic process|GO:0048584,positive regulation of response to stimulus|GO:0048583,regulation of response to stimulus|GO:0031349,positive regulation of defense response|GO:0007165,signal transduction|GO:0007166,cell surface receptor signaling pathway|GO:1901362,organic cyclic compound biosynthetic process|GO:0031347,regu…	GO:0035370,UBC13-UEV1A complex|GO:0043229,intracellular organelle|GO:0043227,membrane-bounded organelle|GO:0043226,organelle|GO:0005737,cytoplasm|GO:0031982,vesicle|GO:0005634,nucleus|GO:0031988,membrane-bounded vesicle|GO:1902494,catalytic complex|GO:1990234,transferase complex|GO:0032991,macromolecular complex|GO:1903561,extracellular vesicle|GO:0031371,ubiquitin conjugating enzyme complex|GO:0…	GO:0019787,ubiquitin-like protein transferase activity|GO:0031624,ubiquitin conjugating enzyme binding|GO:0031625,ubiquitin protein ligase binding|GO:0044389,ubiquitin-like protein ligase binding|GO:0005515,protein binding|GO:0061630,ubiquitin protein ligase activity|GO:0044390,ubiquitin-like protein conjugating enzyme binding|GO:0003824,catalytic activity|GO:0016740,transferase activity|GO:00198…				http://www.uniprot.org/uniprot/Q13404	False
Q04726	2.9302	1.551	Q04726	TLE3	GO:0051252,regulation of RNA metabolic process|GO:0080090,regulation of primary metabolic process|GO:0019222,regulation of metabolic process|GO:0031326,regulation of cellular biosynthetic process|GO:0031323,regulation of cellular metabolic process|GO:0090304,nucleic acid metabolic process|GO:0044249,cellular biosynthetic process|GO:0034641,cellular nitrogen compound metabolic process|GO:0006807,n…	GO:0044446,intracellular organelle part|GO:0043231,intracellular membrane-bounded organelle|GO:0031981,nuclear lumen|GO:0043233,organelle lumen|GO:0005634,nucleus|GO:0044464,cell part|GO:0031974,membrane-enclosed lumen|GO:0005622,intracellular|GO:0005654,nucleoplasm|GO:0070013,intracellular organelle lumen|GO:0043229,intracellular organelle|GO:0044428,nuclear part|GO:0005623,cell|GO:0044424,intra…	GO:0005488,binding|GO:0005515,protein binding|GO:0008134,transcription factor binding|GO:0003714,transcription corepressor activity|GO:0003712,transcription cofactor activity|GO:0140110,transcription regulator activity|GO:0070491,repressing transcription factor binding				http://www.uniprot.org/uniprot/Q04726	False
P56545	2.91804	1.545	P56545	CTBP2	GO:0080090,regulation of primary metabolic process|GO:0019222,regulation of metabolic process|GO:0048584,positive regulation of response to stimulus|GO:0048583,regulation of response to stimulus|GO:0007165,signal transduction|GO:1901362,organic cyclic compound biosynthetic process|GO:1901360,organic cyclic compound metabolic process|GO:0044710,single-organism metabolic process|GO:0010605,negative…	GO:0043234,protein complex|GO:0032991,macromolecular complex|GO:0043231,intracellular membrane-bounded organelle|GO:0017053,transcriptional repressor complex|GO:0005634,nucleus|GO:0044464,cell part|GO:0005623,cell|GO:0005622,intracellular|GO:0043229,intracellular organelle|GO:0097470,ribbon synapse|GO:0045202,synapse|GO:0044424,intracellular part|GO:0043227,membrane-bounded organelle|GO:0043226,o…	GO:0051287,NAD binding|GO:0044877,macromolecular complex binding|GO:0005488,binding|GO:1901363,heterocyclic compound binding|GO:1901265,nucleoside phosphate binding|GO:0016491,oxidoreductase activity|GO:0050662,coenzyme binding|GO:0003714,transcription corepressor activity|GO:0003713,transcription coactivator activity|GO:0003712,transcription cofactor activity|GO:0000166,nucleotide binding|GO:000…	hsa04330,Notch signaling pathway|hsa04310,Wnt signaling pathway|hsa05200,Pathways in cancer|hsa05220,Chronic myeloid leukemia			http://www.uniprot.org/uniprot/P56545	False
Q9BW27	2.91602	1.544	Q9BW27	NUP85	GO:0008104,protein localization|GO:0019221,cytokine-mediated signaling pathway|GO:0051049,regulation of transport|GO:0034605,cellular response to heat|GO:0048583,regulation of response to stimulus|GO:0009408,response to heat|GO:0061024,membrane organization|GO:0007165,signal transduction|GO:0007166,cell surface receptor signaling pathway|GO:0060326,cell chemotaxis|GO:1901362,organic cyclic compou…	GO:0016020,membrane|GO:0043232,intracellular non-membrane-bounded organelle|GO:0031975,envelope|GO:0043229,intracellular organelle|GO:0043228,non-membrane-bounded organelle|GO:0043227,membrane-bounded organelle|GO:0043226,organelle|GO:0031224,intrinsic component of membrane|GO:0005856,cytoskeleton|GO:0005819,spindle|GO:0046930,pore complex|GO:0031090,organelle membrane|GO:0005634,nucleus|GO:00056…	GO:0005488,binding|GO:0005515,protein binding|GO:0017056,structural constituent of nuclear pore|GO:0005198,structural molecule activity	hsa03013,RNA transport			http://www.uniprot.org/uniprot/Q9BW27	False
P13797	2.90795	1.54	P13797	PLS3	GO:0032502,developmental process|GO:0032501,multicellular organismal process|GO:0044707,single-multicellular organism process|GO:0048856,anatomical structure development|GO:0060348,bone development|GO:0044767,single-organism developmental process|GO:0001501,skeletal system development|GO:0048513,animal organ development|GO:0048731,system development|GO:0007275,multicellular organism development|G…	GO:0005737,cytoplasm|GO:0044464,cell part|GO:0005623,cell|GO:0005622,intracellular|GO:0044424,intracellular part|GO:0032432,actin filament bundle|GO:0099512,supramolecular fiber|GO:0099513,polymeric cytoskeletal fiber|GO:0043229,intracellular organelle|GO:0071944,cell periphery|GO:0043226,organelle|GO:0015629,actin cytoskeleton|GO:0005856,cytoskeleton|GO:0016020,membrane|GO:0044430,cytoskeletal p…	GO:0043169,cation binding|GO:0008092,cytoskeletal protein binding|GO:0043167,ion binding|GO:0003779,actin binding|GO:0005509,calcium ion binding|GO:0005515,protein binding|GO:0046872,metal ion binding|GO:0005488,binding|GO:0051015,actin filament binding|GO:0044877,macromolecular complex binding|GO:0032403,protein complex binding				http://www.uniprot.org/uniprot/P13797	False
O75390	2.88986	1.531	O75390	CS	GO:0019752,carboxylic acid metabolic process|GO:0006099,tricarboxylic acid cycle|GO:0009060,aerobic respiration|GO:0044281,small molecule metabolic process|GO:0006091,generation of precursor metabolites and energy|GO:0072350,tricarboxylic acid metabolic process|GO:0044699,single-organism process|GO:0044710,single-organism metabolic process|GO:0044262,cellular carbohydrate metabolic process|GO:007…	GO:0031974,membrane-enclosed lumen|GO:0043229,intracellular organelle|GO:0043227,membrane-bounded organelle|GO:0043226,organelle|GO:0005737,cytoplasm|GO:0070062,extracellular exosome|GO:0005634,nucleus|GO:0005739,mitochondrion|GO:0031988,membrane-bounded vesicle|GO:0005759,mitochondrial matrix|GO:1903561,extracellular vesicle|GO:0031982,vesicle|GO:0043230,extracellular organelle|GO:0043231,intrac…	GO:0046912,transferase activity, transferring acyl groups, acyl groups converted into alkyl on transfer|GO:0004108,citrate (Si)-synthase activity|GO:0097159,organic cyclic compound binding|GO:0044822,poly(A) RNA binding|GO:0036440,citrate synthase activity|GO:0003824,catalytic activity|GO:0016740,transferase activity|GO:0016746,transferase activity, transferring acyl groups|GO:0003723,RNA binding…	hsa01100,Metabolic pathways|hsa00630,Glyoxylate and dicarboxylate metabolism|hsa01200,Carbon metabolism|hsa00020,Citrate cycle (TCA cycle)|hsa01230,Biosynthesis of amino acids|hsa01210,2-Oxocarboxylic acid metabolism			http://www.uniprot.org/uniprot/O75390	False
B4DNW0	2.88786	1.53	B4DNW0	B4DNW0	GO:0044238,primary metabolic process|GO:0044710,single-organism metabolic process|GO:0009987,cellular process|GO:1901564,organonitrogen compound metabolic process|GO:0006082,organic acid metabolic process|GO:0044237,cellular metabolic process|GO:0006520,cellular amino acid metabolic process|GO:0019752,carboxylic acid metabolic process|GO:0071704,organic substance metabolic process|GO:0006807,nitr…	GO:0005737,cytoplasm|GO:0044464,cell part|GO:0005623,cell|GO:0005622,intracellular|GO:0044424,intracellular part	GO:0004046,aminoacylase activity|GO:0016787,hydrolase activity|GO:0016810,hydrolase activity, acting on carbon-nitrogen (but not peptide) bonds|GO:0016811,hydrolase activity, acting on carbon-nitrogen (but not peptide) bonds, in linear amides|GO:0003824,catalytic activity|GO:0070011,peptidase activity, acting on L-amino acid peptides|GO:0008233,peptidase activity|GO:0008237,metallopeptidase activ…				http://www.uniprot.org/uniprot/B4DNW0	False
P24539	2.84415	1.508	P24539	ATP5PB	GO:0009167,purine ribonucleoside monophosphate metabolic process|GO:0009165,nucleotide biosynthetic process|GO:0009163,nucleoside biosynthetic process|GO:0009161,ribonucleoside monophosphate metabolic process|GO:1901362,organic cyclic compound biosynthetic process|GO:0042451,purine nucleoside biosynthetic process|GO:0009168,purine ribonucleoside monophosphate biosynthetic process|GO:0044710,singl…	GO:0098796,membrane protein complex|GO:0044464,cell part|GO:0031974,membrane-enclosed lumen|GO:0031975,envelope|GO:0043229,intracellular organelle|GO:0031988,membrane-bounded vesicle|GO:0043227,membrane-bounded organelle|GO:0043226,organelle|GO:0005737,cytoplasm|GO:0005654,nucleoplasm|GO:0045263,proton-transporting ATP synthase complex, coupling factor F(o)|GO:0070062,extracellular exosome|GO:003…	GO:0005488,binding|GO:0016887,ATPase activity|GO:0042625,ATPase coupled ion transmembrane transporter activity|GO:0042626,ATPase activity, coupled to transmembrane movement of substances|GO:0016820,hydrolase activity, acting on acid anhydrides, catalyzing transmembrane movement of substances|GO:0046933,proton-transporting ATP synthase activity, rotational mechanism|GO:0015077,monovalent inorganic…	hsa00190,Oxidative phosphorylation|hsa04714,Thermogenesis|hsa01100,Metabolic pathways|hsa05016,Huntington disease|hsa05010,Alzheimer disease|hsa05012,Parkinson disease			http://www.uniprot.org/uniprot/P24539	False
Q15121	2.83825	1.505	Q15121	PEA15	GO:2001234,negative regulation of apoptotic signaling pathway|GO:2001235,positive regulation of apoptotic signaling pathway|GO:2001236,regulation of extrinsic apoptotic signaling pathway|GO:2001237,negative regulation of extrinsic apoptotic signaling pathway|GO:2001233,regulation of apoptotic signaling pathway|GO:0051049,regulation of transport|GO:0048585,negative regulation of response to stimul…	GO:0005856,cytoskeleton|GO:0043234,protein complex|GO:0015630,microtubule cytoskeleton|GO:0043228,non-membrane-bounded organelle|GO:0043232,intracellular non-membrane-bounded organelle|GO:0044464,cell part|GO:0005737,cytoplasm|GO:0005623,cell|GO:0043226,organelle|GO:0044446,intracellular organelle part|GO:0043229,intracellular organelle|GO:0044430,cytoskeletal part|GO:0044424,intracellular part|G…	GO:0005488,binding|GO:0005515,protein binding				http://www.uniprot.org/uniprot/Q15121	False
O15347	2.81669	1.494	O15347	HMGB3	GO:0080090,regulation of primary metabolic process|GO:0019222,regulation of metabolic process|GO:1901362,organic cyclic compound biosynthetic process|GO:0071840,cellular component organization or biogenesis|GO:0048869,cellular developmental process|GO:0048513,animal organ development|GO:0048519,negative regulation of biological process|GO:0032392,DNA geometric change|GO:0060255,regulation of macr…	GO:0043231,intracellular membrane-bounded organelle|GO:0043232,intracellular non-membrane-bounded organelle|GO:0043227,membrane-bounded organelle|GO:0005634,nucleus|GO:0044464,cell part|GO:0005623,cell|GO:0005622,intracellular|GO:0043229,intracellular organelle|GO:0043228,non-membrane-bounded organelle|GO:0044424,intracellular part|GO:0005694,chromosome|GO:0043226,organelle|GO:0005737,cytoplasm|G…	GO:0000400,four-way junction DNA binding|GO:0005515,protein binding|GO:0097159,organic cyclic compound binding|GO:0044822,poly(A) RNA binding|GO:0000217,DNA secondary structure binding|GO:0043566,structure-specific DNA binding|GO:0044877,macromolecular complex binding|GO:0003723,RNA binding|GO:0003676,nucleic acid binding|GO:0003677,DNA binding|GO:0008301,DNA binding, bending|GO:0003690,double-st…				http://www.uniprot.org/uniprot/O15347	False
P53985	2.81474	1.493	P53985	SLC16A1	GO:0090087,regulation of peptide transport|GO:0015728,mevalonate transport|GO:0008104,protein localization|GO:0007599,hemostasis|GO:0051046,regulation of secretion|GO:0051049,regulation of transport|GO:0007596,blood coagulation|GO:0007610,behavior|GO:0006820,anion transport|GO:0044281,small molecule metabolic process|GO:0071840,cellular component organization or biogenesis|GO:0044710,single-organ…	GO:0043229,intracellular organelle|GO:0043228,non-membrane-bounded organelle|GO:0005815,microtubule organizing center|GO:0031226,intrinsic component of plasma membrane|GO:0043226,organelle|GO:0031224,intrinsic component of membrane|GO:0005856,cytoskeleton|GO:0031982,vesicle|GO:0005813,centrosome|GO:0016021,integral component of membrane|GO:0016020,membrane|GO:0044444,cytoplasmic part|GO:0005739,m…	GO:0005342,organic acid transmembrane transporter activity|GO:0008028,monocarboxylic acid transmembrane transporter activity|GO:0005488,binding|GO:0015129,lactate transmembrane transporter activity|GO:0008509,anion transmembrane transporter activity|GO:1901618,organic hydroxy compound transmembrane transporter activity|GO:0042802,identical protein binding|GO:0042803,protein homodimerization activ…				http://www.uniprot.org/uniprot/P53985	False
Q15029	2.79529	1.483	Q15029	EFTUD2	GO:0090304,nucleic acid metabolic process|GO:0034641,cellular nitrogen compound metabolic process|GO:0006807,nitrogen compound metabolic process|GO:0044237,cellular metabolic process|GO:1901360,organic cyclic compound metabolic process|GO:0006139,nucleobase-containing compound metabolic process|GO:0044260,cellular macromolecule metabolic process|GO:0071704,organic substance metabolic process|GO:0…	GO:0031974,membrane-enclosed lumen|GO:0043229,intracellular organelle|GO:0043227,membrane-bounded organelle|GO:0043226,organelle|GO:0016607,nuclear speck|GO:0016604,nuclear body|GO:0031981,nuclear lumen|GO:0005634,nucleus|GO:0016020,membrane|GO:0030529,intracellular ribonucleoprotein complex|GO:0005654,nucleoplasm|GO:0044451,nucleoplasm part|GO:0005737,cytoplasm|GO:0071013,catalytic step 2 splice…	GO:0035639,purine ribonucleoside triphosphate binding|GO:0005488,binding|GO:0003676,nucleic acid binding|GO:0043167,ion binding|GO:1901363,heterocyclic compound binding|GO:0001883,purine nucleoside binding|GO:0001882,nucleoside binding|GO:0043168,anion binding|GO:0016462,pyrophosphatase activity|GO:0000166,nucleotide binding|GO:0032561,guanyl ribonucleotide binding|GO:1901265,nucleoside phosphate…	hsa03040,Spliceosome			http://www.uniprot.org/uniprot/Q15029	False
Q9NX40	2.78949	1.48	Q9NX40	OCIAD1	GO:0032502,developmental process|GO:0048863,stem cell differentiation|GO:2000736,regulation of stem cell differentiation|GO:0050793,regulation of developmental process|GO:0048869,cellular developmental process|GO:0030154,cell differentiation|GO:0050794,regulation of cellular process|GO:0044767,single-organism developmental process|GO:0045595,regulation of cell differentiation|GO:0065007,biologica…	GO:0005737,cytoplasm|GO:0043231,intracellular membrane-bounded organelle|GO:0005768,endosome|GO:0016020,membrane|GO:0044464,cell part|GO:0044444,cytoplasmic part|GO:0005739,mitochondrion|GO:0005622,intracellular|GO:0005623,cell|GO:0043229,intracellular organelle|GO:0012505,endomembrane system|GO:0044424,intracellular part|GO:0043227,membrane-bounded organelle|GO:0043226,organelle|GO:0031410,cytop…	GO:0005488,binding|GO:0005515,protein binding				http://www.uniprot.org/uniprot/Q9NX40	False
Q8TCJ2	2.78176	1.476	Q8TCJ2	STT3B	GO:0006950,response to stress|GO:0036503,ERAD pathway|GO:0044248,cellular catabolic process|GO:0044257,cellular protein catabolic process|GO:0034645,cellular macromolecule biosynthetic process|GO:1901576,organic substance biosynthetic process|GO:0043632,modification-dependent macromolecule catabolic process|GO:0009100,glycoprotein metabolic process|GO:0009101,glycoprotein biosynthetic process|GO:…	GO:0005783,endoplasmic reticulum|GO:0005789,endoplasmic reticulum membrane|GO:0042175,nuclear outer membrane-endoplasmic reticulum membrane network|GO:0043229,intracellular organelle|GO:0043227,membrane-bounded organelle|GO:0043226,organelle|GO:0031224,intrinsic component of membrane|GO:0005737,cytoplasm|GO:0031090,organelle membrane|GO:0016021,integral component of membrane|GO:0016020,membrane|G…	GO:0003824,catalytic activity|GO:0016740,transferase activity|GO:0004576,oligosaccharyl transferase activity|GO:0016757,transferase activity, transferring glycosyl groups|GO:0016758,transferase activity, transferring hexosyl groups|GO:0004579,dolichyl-diphosphooligosaccharide-protein glycotransferase activity|GO:0043169,cation binding|GO:0046872,metal ion binding|GO:0043167,ion binding|GO:0005488…	hsa04141,Protein processing in endoplasmic reticulum|hsa00513,Various types of N-glycan biosynthesis|hsa00510,N-Glycan biosynthesis|hsa01100,Metabolic pathways			http://www.uniprot.org/uniprot/Q8TCJ2	False
P21796	2.76255	1.466	P21796	VDAC1	GO:0019222,regulation of metabolic process|GO:0051049,regulation of transport|GO:0007612,learning|GO:0007610,behavior|GO:0007611,learning or memory|GO:0006820,anion transport|GO:0034765,regulation of ion transmembrane transport|GO:0034762,regulation of transmembrane transport|GO:0044712,single-organism catabolic process|GO:0044710,single-organism metabolic process|GO:0048869,cellular developmenta…	GO:0098796,membrane protein complex|GO:0044421,extracellular region part|GO:0044464,cell part|GO:0031974,membrane-enclosed lumen|GO:0031975,envelope|GO:0043229,intracellular organelle|GO:0043228,non-membrane-bounded organelle|GO:0042645,mitochondrial nucleoid|GO:0043227,membrane-bounded organelle|GO:0043226,organelle|GO:0031224,intrinsic component of membrane|GO:0005737,cytoplasm|GO:0046930,pore …	GO:0019899,enzyme binding|GO:0044877,macromolecular complex binding|GO:0005488,binding|GO:0022838,substrate-specific channel activity|GO:0008509,anion transmembrane transporter activity|GO:0022829,wide pore channel activity|GO:0032403,protein complex binding|GO:0022803,passive transmembrane transporter activity|GO:0005253,anion channel activity|GO:0005215,transporter activity|GO:0005216,ion chann…	hsa04022,cGMP-PKG signaling pathway|hsa04979,Cholesterol metabolism|hsa04020,Calcium signaling pathway|hsa04621,NOD-like receptor signaling pathway|hsa04218,Cellular senescence|hsa05012,Parkinson disease|hsa05164,Influenza A|hsa05016,Huntington disease|hsa05166,Human T-cell leukemia virus 1 infection|hsa04217,Necroptosis			http://www.uniprot.org/uniprot/P21796	False
Q07666	2.76063	1.465	Q07666	KHDRBS1	GO:0051169,nuclear transport|GO:0051168,nuclear export|GO:0032388,positive regulation of intracellular transport|GO:0080090,regulation of primary metabolic process|GO:0019222,regulation of metabolic process|GO:0000086,G2/M transition of mitotic cell cycle|GO:0051049,regulation of transport|GO:0032386,regulation of intracellular transport|GO:0048584,positive regulation of response to stimulus|GO:0…	GO:0031974,membrane-enclosed lumen|GO:0043229,intracellular organelle|GO:0071944,cell periphery|GO:0043227,membrane-bounded organelle|GO:0043226,organelle|GO:0005737,cytoplasm|GO:0098797,plasma membrane protein complex|GO:0031981,nuclear lumen|GO:0070013,intracellular organelle lumen|GO:0005634,nucleus|GO:0016020,membrane|GO:0005654,nucleoplasm|GO:0044459,plasma membrane part|GO:0005886,plasma me…	GO:0008143,poly(A) binding|GO:0017124,SH3 domain binding|GO:0044877,macromolecular complex binding|GO:0005488,binding|GO:0003676,nucleic acid binding|GO:0003677,DNA binding|GO:0008187,poly-pyrimidine tract binding|GO:1901363,heterocyclic compound binding|GO:0005070,SH3/SH2 adaptor activity|GO:0003727,single-stranded RNA binding|GO:0032403,protein complex binding|GO:0042802,identical protein bindi…				http://www.uniprot.org/uniprot/Q07666	False
P07954	2.74727	1.458	P07954	FH	GO:0060249,anatomical structure homeostasis|GO:0019752,carboxylic acid metabolic process|GO:0042592,homeostatic process|GO:0006099,tricarboxylic acid cycle|GO:0009060,aerobic respiration|GO:0044281,small molecule metabolic process|GO:0006091,generation of precursor metabolites and energy|GO:0072350,tricarboxylic acid metabolic process|GO:0044699,single-organism process|GO:0044710,single-organism …	GO:0031974,membrane-enclosed lumen|GO:0043229,intracellular organelle|GO:0043227,membrane-bounded organelle|GO:0043226,organelle|GO:0005737,cytoplasm|GO:0070062,extracellular exosome|GO:0005739,mitochondrion|GO:0031988,membrane-bounded vesicle|GO:0005759,mitochondrial matrix|GO:0045239,tricarboxylic acid cycle enzyme complex|GO:0032991,macromolecular complex|GO:1903561,extracellular vesicle|GO:00…	GO:0016835,carbon-oxygen lyase activity|GO:0016836,hydro-lyase activity|GO:0003824,catalytic activity|GO:0005488,binding|GO:0005515,protein binding|GO:0004333,fumarate hydratase activity|GO:0016829,lyase activity	hsa00620,Pyruvate metabolism|hsa01100,Metabolic pathways|hsa05211,Renal cell carcinoma|hsa05200,Pathways in cancer|hsa01200,Carbon metabolism|hsa04934,Cushing syndrome|hsa00020,Citrate cycle (TCA cycle)			http://www.uniprot.org/uniprot/P07954	False
P28072	2.73967	1.454	P28072	PSMB6	GO:0080090,regulation of primary metabolic process|GO:0019222,regulation of metabolic process|GO:0048585,negative regulation of response to stimulus|GO:0048584,positive regulation of response to stimulus|GO:0048583,regulation of response to stimulus|GO:0031349,positive regulation of defense response|GO:0030111,regulation of Wnt signaling pathway|GO:0007165,signal transduction|GO:0007166,cell surf…	GO:0031974,membrane-enclosed lumen|GO:0043229,intracellular organelle|GO:0043227,membrane-bounded organelle|GO:0043226,organelle|GO:0005737,cytoplasm|GO:0005839,proteasome core complex|GO:0031981,nuclear lumen|GO:0005634,nucleus|GO:0031988,membrane-bounded vesicle|GO:0005654,nucleoplasm|GO:0032991,macromolecular complex|GO:0005794,Golgi apparatus|GO:0031982,vesicle|GO:0012505,endomembrane system|…	GO:0016787,hydrolase activity|GO:0004175,endopeptidase activity|GO:0004298,threonine-type endopeptidase activity|GO:0003824,catalytic activity|GO:0070003,threonine-type peptidase activity|GO:0070011,peptidase activity, acting on L-amino acid peptides|GO:0008233,peptidase activity|GO:0045296,cadherin binding|GO:0005488,binding|GO:0005515,protein binding|GO:0050839,cell adhesion molecule binding|GO…	hsa03050,Proteasome			http://www.uniprot.org/uniprot/P28072	False
A0A0A0MSM0	2.72641	1.447	A0A0A0MSM0	HSPH1		GO:0005737,cytoplasm|GO:0044446,intracellular organelle part|GO:0005829,cytosol|GO:0043231,intracellular membrane-bounded organelle|GO:0031981,nuclear lumen|GO:0043233,organelle lumen|GO:0005634,nucleus|GO:0044464,cell part|GO:0044444,cytoplasmic part|GO:0031974,membrane-enclosed lumen|GO:0005622,intracellular|GO:0005654,nucleoplasm|GO:0070013,intracellular organelle lumen|GO:0043229,intracellula…		hsa04141,Protein processing in endoplasmic reticulum			http://www.uniprot.org/uniprot/A0A0A0MSM0	False
Q96CS3	2.70382	1.435	Q96CS3	FAF2	GO:0010033,response to organic substance|GO:0008104,protein localization|GO:0009892,negative regulation of metabolic process|GO:0019222,regulation of metabolic process|GO:0051649,establishment of localization in cell|GO:1903513,endoplasmic reticulum to cytosol transport|GO:0036503,ERAD pathway|GO:0044248,cellular catabolic process|GO:0051641,cellular localization|GO:0043632,modification-dependent…	GO:0005811,lipid particle|GO:0005783,endoplasmic reticulum|GO:0005789,endoplasmic reticulum membrane|GO:0042175,nuclear outer membrane-endoplasmic reticulum membrane network|GO:0043229,intracellular organelle|GO:0043228,non-membrane-bounded organelle|GO:0043227,membrane-bounded organelle|GO:0043226,organelle|GO:0005737,cytoplasm|GO:0031090,organelle membrane|GO:0016020,membrane|GO:0044432,endopla…	GO:0035473,lipase binding|GO:0055102,lipase inhibitor activity|GO:0044389,ubiquitin-like protein ligase binding|GO:0030234,enzyme regulator activity|GO:0032182,ubiquitin-like protein binding|GO:0019899,enzyme binding|GO:0031625,ubiquitin protein ligase binding|GO:0043130,ubiquitin binding|GO:0005488,binding|GO:0005515,protein binding|GO:0004857,enzyme inhibitor activity|GO:0098772,molecular funct…				http://www.uniprot.org/uniprot/Q96CS3	False
V9HW80	2.69821	1.432	V9HW80	HEL-S-70	GO:0008104,protein localization|GO:0032436,positive regulation of proteasomal ubiquitin-dependent protein catabolic process|GO:0080090,regulation of primary metabolic process|GO:0032434,regulation of proteasomal ubiquitin-dependent protein catabolic process|GO:0034214,protein hexamerization|GO:0009167,purine ribonucleoside monophosphate metabolic process|GO:0044281,small molecule metabolic proces…	GO:0005783,endoplasmic reticulum|GO:0031974,membrane-enclosed lumen|GO:0005789,endoplasmic reticulum membrane|GO:0042175,nuclear outer membrane-endoplasmic reticulum membrane network|GO:0043229,intracellular organelle|GO:0043227,membrane-bounded organelle|GO:0043226,organelle|GO:0005737,cytoplasm|GO:0031984,organelle subcompartment|GO:0031981,nuclear lumen|GO:0098796,membrane protein complex|GO:0…	GO:0035639,purine ribonucleoside triphosphate binding|GO:0019899,enzyme binding|GO:0044877,macromolecular complex binding|GO:0005488,binding|GO:0016887,ATPase activity|GO:0031593,polyubiquitin binding|GO:0000166,nucleotide binding|GO:1901363,heterocyclic compound binding|GO:1901265,nucleoside phosphate binding|GO:0043168,anion binding|GO:1990381,ubiquitin-specific protease binding|GO:0043167,ion …				http://www.uniprot.org/uniprot/V9HW80	False
P52597	2.62806	1.394	P52597	HNRNPF	GO:0080090,regulation of primary metabolic process|GO:0019222,regulation of metabolic process|GO:0031323,regulation of cellular metabolic process|GO:0090304,nucleic acid metabolic process|GO:0034641,cellular nitrogen compound metabolic process|GO:0006807,nitrogen compound metabolic process|GO:0044237,cellular metabolic process|GO:0043170,macromolecule metabolic process|GO:0050789,regulation of bi…	GO:0031974,membrane-enclosed lumen|GO:0043229,intracellular organelle|GO:0043227,membrane-bounded organelle|GO:0043226,organelle|GO:0031981,nuclear lumen|GO:0005634,nucleus|GO:0016020,membrane|GO:0030529,intracellular ribonucleoprotein complex|GO:0005654,nucleoplasm|GO:0071013,catalytic step 2 spliceosome|GO:0032991,macromolecular complex|GO:0043231,intracellular membrane-bounded organelle|GO:004…	GO:0005515,protein binding|GO:0097159,organic cyclic compound binding|GO:0044822,poly(A) RNA binding|GO:0000166,nucleotide binding|GO:0036094,small molecule binding|GO:0003727,single-stranded RNA binding|GO:0003723,RNA binding|GO:0003676,nucleic acid binding|GO:1901363,heterocyclic compound binding|GO:1901265,nucleoside phosphate binding|GO:0005488,binding|GO:0008134,transcription factor binding|…				http://www.uniprot.org/uniprot/P52597	False
P11021	2.62624	1.393	P11021	HSPA5	GO:0006887,exocytosis|GO:0019220,regulation of phosphate metabolic process|GO:0080090,regulation of primary metabolic process|GO:0019222,regulation of metabolic process|GO:0051049,regulation of transport|GO:0048585,negative regulation of response to stimulus|GO:0007596,blood coagulation|GO:0048583,regulation of response to stimulus|GO:0006468,protein phosphorylation|GO:0060322,head development|GO…	GO:0005783,endoplasmic reticulum|GO:0044421,extracellular region part|GO:0044464,cell part|GO:0048770,pigment granule|GO:0031974,membrane-enclosed lumen|GO:0005789,endoplasmic reticulum membrane|GO:0043226,organelle|GO:0042175,nuclear outer membrane-endoplasmic reticulum membrane network|GO:0043229,intracellular organelle|GO:0030176,integral component of endoplasmic reticulum membrane|GO:0031301,…	GO:0044389,ubiquitin-like protein ligase binding|GO:0035639,purine ribonucleoside triphosphate binding|GO:0019899,enzyme binding|GO:0044877,macromolecular complex binding|GO:0005488,binding|GO:0016887,ATPase activity|GO:0043167,ion binding|GO:1901363,heterocyclic compound binding|GO:0001883,purine nucleoside binding|GO:0001882,nucleoside binding|GO:0043168,anion binding|GO:0043169,cation binding|…	hsa04141,Protein processing in endoplasmic reticulum|hsa04918,Thyroid hormone synthesis|hsa04612,Antigen processing and presentation|hsa05020,Prion diseases|hsa03060,Protein export			http://www.uniprot.org/uniprot/P11021	False
P62983	2.61534	1.387	P62983	P62983							http://www.uniprot.org/uniprot/P62983	False
Q16643	2.61172	1.385	Q16643	DBN1	GO:0032502,developmental process|GO:0044707,single-multicellular organism process|GO:0010975,regulation of neuron projection development|GO:0030030,cell projection organization|GO:0031175,neuron projection development|GO:0048468,cell development|GO:0016358,dendrite development|GO:0030036,actin cytoskeleton organization|GO:0050804,modulation of synaptic transmission|GO:0048167,regulation of synapt…	GO:0015629,actin cytoskeleton|GO:0030425,dendrite|GO:0043229,intracellular organelle|GO:0043228,non-membrane-bounded organelle|GO:0043226,organelle|GO:0030054,cell junction|GO:0005921,gap junction|GO:0005856,cytoskeleton|GO:0016020,membrane|GO:0097458,neuron part|GO:0044430,cytoskeletal part|GO:0043005,neuron projection|GO:0042641,actomyosin|GO:0005737,cytoplasm|GO:0005938,cell cortex|GO:0005911,…	GO:0008092,cytoskeletal protein binding|GO:0003779,actin binding|GO:0005488,binding|GO:0005515,protein binding|GO:0005522,profilin binding|GO:0045296,cadherin binding|GO:0050839,cell adhesion molecule binding|GO:0044877,macromolecular complex binding|GO:0051015,actin filament binding				http://www.uniprot.org/uniprot/Q16643	False
P62258	2.60629	1.382	P62258	YWHAE	GO:2001235,positive regulation of apoptotic signaling pathway|GO:0008104,protein localization|GO:0019220,regulation of phosphate metabolic process|GO:0080090,regulation of primary metabolic process|GO:0019222,regulation of metabolic process|GO:2001233,regulation of apoptotic signaling pathway|GO:0000086,G2/M transition of mitotic cell cycle|GO:0051049,regulation of transport|GO:0032386,regulation…	GO:0048770,pigment granule|GO:0030424,axon|GO:0043226,organelle|GO:0043229,intracellular organelle|GO:0043228,non-membrane-bounded organelle|GO:0005871,kinesin complex|GO:0005924,cell-substrate adherens junction|GO:0005925,focal adhesion|GO:0043227,membrane-bounded organelle|GO:0005875,microtubule associated complex|GO:0030054,cell junction|GO:0030055,cell-substrate junction|GO:0005856,cytoskelet…	GO:0044389,ubiquitin-like protein ligase binding|GO:0031406,carboxylic acid binding|GO:0019899,enzyme binding|GO:0044877,macromolecular complex binding|GO:0005488,binding|GO:0003676,nucleic acid binding|GO:0045309,protein phosphorylated amino acid binding|GO:0044325,ion channel binding|GO:0098772,molecular function regulator|GO:0016597,amino acid binding|GO:1901363,heterocyclic compound binding|G…	hsa04110,Cell cycle|hsa04621,NOD-like receptor signaling pathway|hsa04114,Oocyte meiosis|hsa04722,Neurotrophin signaling pathway|hsa04390,Hippo signaling pathway|hsa05203,Viral carcinogenesis|hsa05160,Hepatitis C|hsa04151,PI3K-Akt signaling pathway			http://www.uniprot.org/uniprot/P62258	False
B7ZAR1	2.59908	1.378	B7ZAR1	CCT5	GO:0044267,cellular protein metabolic process|GO:0006457,protein folding|GO:0044260,cellular macromolecule metabolic process|GO:0044238,primary metabolic process|GO:0019538,protein metabolic process|GO:0009987,cellular process|GO:0044237,cellular metabolic process|GO:0043170,macromolecule metabolic process|GO:0071704,organic substance metabolic process|GO:0008152,metabolic process	GO:0005737,cytoplasm|GO:0043231,intracellular membrane-bounded organelle|GO:0031981,nuclear lumen|GO:0043233,organelle lumen|GO:0005634,nucleus|GO:0005730,nucleolus|GO:0044464,cell part|GO:0043232,intracellular non-membrane-bounded organelle|GO:0031974,membrane-enclosed lumen|GO:0005622,intracellular|GO:0044446,intracellular organelle part|GO:0070013,intracellular organelle lumen|GO:0043229,intra…	GO:0035639,purine ribonucleoside triphosphate binding|GO:0005488,binding|GO:0043167,ion binding|GO:1901363,heterocyclic compound binding|GO:1901265,nucleoside phosphate binding|GO:0001882,nucleoside binding|GO:0043168,anion binding|GO:0051082,unfolded protein binding|GO:0000166,nucleotide binding|GO:0001883,purine nucleoside binding|GO:0032549,ribonucleoside binding|GO:0017076,purine nucleotide b…				http://www.uniprot.org/uniprot/B7ZAR1	False
P27797	2.58829	1.372	P27797	CALR	GO:0051169,nuclear transport|GO:0051168,nuclear export|GO:0006909,phagocytosis|GO:0051049,regulation of transport|GO:0098771,inorganic ion homeostasis|GO:0051716,cellular response to stimulus|GO:0000003,reproduction|GO:0030595,leukocyte chemotaxis|GO:0048468,cell development|GO:0007283,spermatogenesis|GO:0046483,heterocycle metabolic process|GO:0009605,response to external stimulus|GO:0019538,pro…	GO:0009897,external side of plasma membrane|GO:0016021,integral component of membrane|GO:0005783,endoplasmic reticulum|GO:0044421,extracellular region part|GO:0098576,lumenal side of membrane|GO:0098552,side of membrane|GO:0005788,endoplasmic reticulum lumen|GO:0031012,extracellular matrix|GO:0030139,endocytic vesicle|GO:0042175,nuclear outer membrane-endoplasmic reticulum membrane network|GO:004…	GO:0005488,binding|GO:0044389,ubiquitin-like protein ligase binding|GO:0050681,androgen receptor binding|GO:0030246,carbohydrate binding|GO:0019899,enzyme binding|GO:0044877,macromolecular complex binding|GO:0008270,zinc ion binding|GO:0003676,nucleic acid binding|GO:0003677,DNA binding|GO:1901363,heterocyclic compound binding|GO:0001948,glycoprotein binding|GO:0043169,cation binding|GO:0042277,p…	hsa05142,Chagas disease|hsa04612,Antigen processing and presentation|hsa04141,Protein processing in endoplasmic reticulum|hsa04145,Phagosome|hsa05169,Epstein-Barr virus infection|hsa05168,Herpes simplex virus 1 infection|hsa05166,Human T-cell leukemia virus 1 infection|hsa05170,Human immunodeficiency virus 1 infection|hsa05163,Human cytomegalovirus infection			http://www.uniprot.org/uniprot/P27797	False
P05091	2.57934	1.367	P05091	ALDH2	GO:0042133,neurotransmitter metabolic process|GO:0070887,cellular response to chemical stimulus|GO:0042136,neurotransmitter biosynthetic process|GO:1901615,organic hydroxy compound metabolic process|GO:0034310,primary alcohol catabolic process|GO:0009410,response to xenobiotic stimulus|GO:0023052,signaling|GO:0001505,regulation of neurotransmitter levels|GO:0044282,small molecule catabolic proces…	GO:0031974,membrane-enclosed lumen|GO:0043229,intracellular organelle|GO:0043227,membrane-bounded organelle|GO:0043226,organelle|GO:0005737,cytoplasm|GO:0070062,extracellular exosome|GO:0005739,mitochondrion|GO:0031988,membrane-bounded vesicle|GO:0005759,mitochondrial matrix|GO:1903561,extracellular vesicle|GO:0031982,vesicle|GO:0043230,extracellular organelle|GO:0043231,intracellular membrane-bo…	GO:0004030,aldehyde dehydrogenase [NAD(P)+] activity|GO:0004029,aldehyde dehydrogenase (NAD) activity|GO:0016620,oxidoreductase activity, acting on the aldehyde or oxo group of donors, NAD or NADP as acceptor|GO:0003824,catalytic activity|GO:0016903,oxidoreductase activity, acting on the aldehyde or oxo group of donors|GO:0009055,electron carrier activity|GO:0016491,oxidoreductase activity|GO:005…	hsa00310,Lysine degradation|hsa00561,Glycerolipid metabolism|hsa00380,Tryptophan metabolism|hsa00330,Arginine and proline metabolism|hsa00620,Pyruvate metabolism|hsa00410,beta-Alanine metabolism|hsa00071,Fatty acid degradation|hsa00280,Valine, leucine and isoleucine degradation|hsa00053,Ascorbate and aldarate metabolism|hsa00010,Glycolysis / Gluconeogenesis|hsa01100,Metabolic pathways|hsa00340,Hi…		D00123,Cyanamide (JP16); Cyanamide (TN)|D00131,Disulfiram (JP16/USP/INN); Antabuse (TN)	http://www.uniprot.org/uniprot/P05091	False
Q9H6Z4	2.54912	1.35	Q9H6Z4	RANBP3	GO:0033036,macromolecule localization|GO:0008104,protein localization|GO:0071702,organic substance transport|GO:0046907,intracellular transport|GO:0006810,transport|GO:0045184,establishment of protein localization|GO:0051649,establishment of localization in cell|GO:0015031,protein transport|GO:0051234,establishment of localization|GO:0051179,localization|GO:0051641,cellular localization|GO:005116…	GO:0005737,cytoplasm|GO:0044446,intracellular organelle part|GO:0043231,intracellular membrane-bounded organelle|GO:0031981,nuclear lumen|GO:0043233,organelle lumen|GO:0005634,nucleus|GO:0044464,cell part|GO:0031974,membrane-enclosed lumen|GO:0005622,intracellular|GO:0005654,nucleoplasm|GO:0070013,intracellular organelle lumen|GO:0043229,intracellular organelle|GO:0044428,nuclear part|GO:0005623,…	GO:0008536,Ran GTPase binding|GO:0019899,enzyme binding|GO:0017016,Ras GTPase binding|GO:0046332,SMAD binding|GO:0031267,small GTPase binding|GO:0051020,GTPase binding|GO:0070412,R-SMAD binding|GO:0005488,binding|GO:0005515,protein binding|GO:0030234,enzyme regulator activity|GO:0005096,GTPase activator activity|GO:0030695,GTPase regulator activity|GO:0008047,enzyme activator activity|GO:0098772,…	hsa05166,Human T-cell leukemia virus 1 infection			http://www.uniprot.org/uniprot/Q9H6Z4	False
P62151	2.47942	1.31		P62151								False
Q7L4K8	2.47942	1.31	Q7L4K8	IARS	GO:0044238,primary metabolic process|GO:0019752,carboxylic acid metabolic process|GO:0090304,nucleic acid metabolic process|GO:0044249,cellular biosynthetic process|GO:0034641,cellular nitrogen compound metabolic process|GO:0006807,nitrogen compound metabolic process|GO:0044281,small molecule metabolic process|GO:0034645,cellular macromolecule biosynthetic process|GO:0034660,ncRNA metabolic proce…		GO:0035639,purine ribonucleoside triphosphate binding|GO:0005488,binding|GO:0043167,ion binding|GO:1901363,heterocyclic compound binding|GO:1901265,nucleoside phosphate binding|GO:0043168,anion binding|GO:0004812,aminoacyl-tRNA ligase activity|GO:0000166,nucleotide binding|GO:0017076,purine nucleotide binding|GO:0005524,ATP binding|GO:0036094,small molecule binding|GO:0003824,catalytic activity|G…				http://www.uniprot.org/uniprot/Q7L4K8	False
P40227	2.42671	1.279	P40227	CCT6A	GO:0006457,protein folding|GO:0006458,'de novo' protein folding|GO:0019953,sexual reproduction|GO:1901998,toxin transport|GO:0044699,single-organism process|GO:0044267,cellular protein metabolic process|GO:0000003,reproduction|GO:0044260,cellular macromolecule metabolic process|GO:0051084,'de novo' posttranslational protein folding|GO:0071704,organic substance metabolic process|GO:0008037,cell re…	GO:0043229,intracellular organelle|GO:0043228,non-membrane-bounded organelle|GO:0001669,acrosomal vesicle|GO:0043227,membrane-bounded organelle|GO:0043226,organelle|GO:0005856,cytoskeleton|GO:0070062,extracellular exosome|GO:0044445,cytosolic part|GO:0016023,cytoplasmic, membrane-bounded vesicle|GO:0005874,microtubule|GO:0097223,sperm part|GO:0005832,chaperonin-containing T-complex|GO:0031988,mem…	GO:0035639,purine ribonucleoside triphosphate binding|GO:0005488,binding|GO:0003676,nucleic acid binding|GO:0000166,nucleotide binding|GO:1901363,heterocyclic compound binding|GO:1901265,nucleoside phosphate binding|GO:0001882,nucleoside binding|GO:0043168,anion binding|GO:0051082,unfolded protein binding|GO:0043167,ion binding|GO:0001883,purine nucleoside binding|GO:0032549,ribonucleoside bindin…				http://www.uniprot.org/uniprot/P40227	False
O43795	2.42335	1.277	O43795	MYO1B	GO:0022607,cellular component assembly|GO:0061572,actin filament bundle organization|GO:0043933,macromolecular complex subunit organization|GO:0030036,actin cytoskeleton organization|GO:0006928,movement of cell or subcellular component|GO:0044699,single-organism process|GO:0071822,protein complex subunit organization|GO:0048193,Golgi vesicle transport|GO:0016043,cellular component organization|GO…	GO:0016459,myosin complex|GO:0042995,cell projection|GO:0015629,actin cytoskeleton|GO:0044421,extracellular region part|GO:0030175,filopodium|GO:0043229,intracellular organelle|GO:0043228,non-membrane-bounded organelle|GO:0005622,intracellular|GO:0043227,membrane-bounded organelle|GO:0043226,organelle|GO:0010008,endosome membrane|GO:0005856,cytoskeleton|GO:0031984,organelle subcompartment|GO:0031…	GO:0035639,purine ribonucleoside triphosphate binding|GO:0044877,macromolecular complex binding|GO:0005488,binding|GO:0016887,ATPase activity|GO:0005547,phosphatidylinositol-3,4,5-trisphosphate binding|GO:1901363,heterocyclic compound binding|GO:0001883,purine nucleoside binding|GO:0001882,nucleoside binding|GO:0043168,anion binding|GO:0003779,actin binding|GO:0000146,microfilament motor activity…	hsa05130,Pathogenic Escherichia coli infection			http://www.uniprot.org/uniprot/O43795	False
P04075	2.40827	1.268	P04075	ALDOA	GO:0007599,hemostasis|GO:0060249,anatomical structure homeostasis|GO:0007596,blood coagulation|GO:0009167,purine ribonucleoside monophosphate metabolic process|GO:0061621,canonical glycolysis|GO:0061620,glycolytic process through glucose-6-phosphate|GO:0009163,nucleoside biosynthetic process|GO:0009161,ribonucleoside monophosphate metabolic process|GO:1901362,organic cyclic compound biosynthetic …	GO:0016020,membrane|GO:0015629,actin cytoskeleton|GO:0031974,membrane-enclosed lumen|GO:0030016,myofibril|GO:0030017,sarcomere|GO:0043229,intracellular organelle|GO:0043228,non-membrane-bounded organelle|GO:0060205,cytoplasmic membrane-bounded vesicle lumen|GO:0043227,membrane-bounded organelle|GO:0043226,organelle|GO:0005856,cytoskeleton|GO:0031430,M band|GO:0031983,vesicle lumen|GO:0070062,extr…	GO:0005488,binding|GO:0015631,tubulin binding|GO:0003676,nucleic acid binding|GO:0070061,fructose binding|GO:0008092,cytoskeletal protein binding|GO:0005515,protein binding|GO:0097159,organic cyclic compound binding|GO:0016829,lyase activity|GO:0016830,carbon-carbon lyase activity|GO:0030246,carbohydrate binding|GO:0016832,aldehyde-lyase activity|GO:1901363,heterocyclic compound binding|GO:000377…	hsa01200,Carbon metabolism|hsa01100,Metabolic pathways|hsa00030,Pentose phosphate pathway|hsa04066,HIF-1 signaling pathway|hsa00051,Fructose and mannose metabolism|hsa01230,Biosynthesis of amino acids|hsa00010,Glycolysis / Gluconeogenesis			http://www.uniprot.org/uniprot/P04075	False
P55884	2.38833	1.256	P55884	EIF3B	GO:0022607,cellular component assembly|GO:0080090,regulation of primary metabolic process|GO:0019222,regulation of metabolic process|GO:0043933,macromolecular complex subunit organization|GO:2000112,regulation of cellular macromolecule biosynthetic process|GO:0031323,regulation of cellular metabolic process|GO:0044249,cellular biosynthetic process|GO:0034641,cellular nitrogen compound metabolic p…	GO:0044421,extracellular region part|GO:0031974,membrane-enclosed lumen|GO:0043229,intracellular organelle|GO:0030529,intracellular ribonucleoprotein complex|GO:0043227,membrane-bounded organelle|GO:0043226,organelle|GO:0005737,cytoplasm|GO:0005852,eukaryotic translation initiation factor 3 complex|GO:0070062,extracellular exosome|GO:0031981,nuclear lumen|GO:0016282,eukaryotic 43S preinitiation c…	GO:0005488,binding|GO:0036094,small molecule binding|GO:0005515,protein binding|GO:0097159,organic cyclic compound binding|GO:0008135,translation factor activity, RNA binding|GO:0005198,structural molecule activity|GO:0032947,protein complex scaffold activity|GO:0003723,RNA binding|GO:0003676,nucleic acid binding|GO:0031369,translation initiation factor binding|GO:0000166,nucleotide binding|GO:19…	hsa03013,RNA transport			http://www.uniprot.org/uniprot/P55884	False
Q9UIJ7	2.35055	1.233	Q9UIJ7	AK3	GO:0007599,hemostasis|GO:0009218,pyrimidine ribonucleotide metabolic process|GO:0007596,blood coagulation|GO:0009167,purine ribonucleoside monophosphate metabolic process|GO:0009165,nucleotide biosynthetic process|GO:0009163,nucleoside biosynthetic process|GO:0009161,ribonucleoside monophosphate metabolic process|GO:1901362,organic cyclic compound biosynthetic process|GO:0046131,pyrimidine ribonu…	GO:0005737,cytoplasm|GO:0043231,intracellular membrane-bounded organelle|GO:0043233,organelle lumen|GO:0044464,cell part|GO:0044444,cytoplasmic part|GO:0031974,membrane-enclosed lumen|GO:0005622,intracellular|GO:0044446,intracellular organelle part|GO:0070013,intracellular organelle lumen|GO:0043229,intracellular organelle|GO:0005739,mitochondrion|GO:0044429,mitochondrial part|GO:0005759,mitochon…	GO:0019201,nucleotide kinase activity|GO:0019205,nucleobase-containing compound kinase activity|GO:0035639,purine ribonucleoside triphosphate binding|GO:0004017,adenylate kinase activity|GO:0005488,binding|GO:0043167,ion binding|GO:1901363,heterocyclic compound binding|GO:0001883,purine nucleoside binding|GO:0001882,nucleoside binding|GO:0043168,anion binding|GO:0000166,nucleotide binding|GO:0032…	hsa00230,Purine metabolism			http://www.uniprot.org/uniprot/Q9UIJ7	False
Q13308	2.34567	1.23	Q13308	PTK7	GO:0010975,regulation of neuron projection development|GO:0048589,developmental growth|GO:0048468,cell development|GO:0007163,establishment or maintenance of cell polarity|GO:0007164,establishment of tissue polarity|GO:0007165,signal transduction|GO:0007166,cell surface receptor signaling pathway|GO:0031344,regulation of cell projection organization|GO:0071840,cellular component organization or b…	GO:0016020,membrane|GO:0005887,integral component of plasma membrane|GO:0044459,plasma membrane part|GO:0016021,integral component of membrane|GO:0070161,anchoring junction|GO:0044464,cell part|GO:0005623,cell|GO:0031224,intrinsic component of membrane|GO:0071944,cell periphery|GO:0005912,adherens junction|GO:0005911,cell-cell junction|GO:0005886,plasma membrane|GO:0044425,membrane part|GO:000592…	GO:0035639,purine ribonucleoside triphosphate binding|GO:0004672,protein kinase activity|GO:0043167,ion binding|GO:1901363,heterocyclic compound binding|GO:0001883,purine nucleoside binding|GO:0001882,nucleoside binding|GO:0043168,anion binding|GO:0000166,nucleotide binding|GO:0016740,transferase activity|GO:0004713,protein tyrosine kinase activity|GO:0032549,ribonucleoside binding|GO:0017076,pur…				http://www.uniprot.org/uniprot/Q13308	False
Q16698	2.33593	1.224	Q16698	DECR1	GO:0034440,lipid oxidation|GO:0006631,fatty acid metabolic process|GO:0022607,cellular component assembly|GO:0006635,fatty acid beta-oxidation|GO:0051289,protein homotetramerization|GO:0043933,macromolecular complex subunit organization|GO:0019752,carboxylic acid metabolic process|GO:0044248,cellular catabolic process|GO:0009062,fatty acid catabolic process|GO:0044281,small molecule metabolic pro…	GO:0031974,membrane-enclosed lumen|GO:0043229,intracellular organelle|GO:0043227,membrane-bounded organelle|GO:0043226,organelle|GO:0005737,cytoplasm|GO:0070062,extracellular exosome|GO:0031981,nuclear lumen|GO:0005634,nucleus|GO:0005739,mitochondrion|GO:0031988,membrane-bounded vesicle|GO:0005654,nucleoplasm|GO:0005759,mitochondrial matrix|GO:1903561,extracellular vesicle|GO:0031982,vesicle|GO:0…	GO:0043168,anion binding|GO:0050662,coenzyme binding|GO:0050661,NADP binding|GO:0016628,oxidoreductase activity, acting on the CH-CH group of donors, NAD or NADP as acceptor|GO:0008670,2,4-dienoyl-CoA reductase (NADPH) activity|GO:0016627,oxidoreductase activity, acting on the CH-CH group of donors|GO:0097159,organic cyclic compound binding|GO:0000166,nucleotide binding|GO:0036094,small molecule …				http://www.uniprot.org/uniprot/Q16698	False
Q13283	2.31017	1.208	Q13283	G3BP1	GO:0071103,DNA conformation change|GO:0048585,negative regulation of response to stimulus|GO:0048583,regulation of response to stimulus|GO:0090304,nucleic acid metabolic process|GO:0023057,negative regulation of signaling|GO:0030111,regulation of Wnt signaling pathway|GO:0006807,nitrogen compound metabolic process|GO:0023052,signaling|GO:0007165,signal transduction|GO:0007166,cell surface recepto…	GO:0035770,ribonucleoprotein granule|GO:0043229,intracellular organelle|GO:0043228,non-membrane-bounded organelle|GO:0036464,cytoplasmic ribonucleoprotein granule|GO:0005924,cell-substrate adherens junction|GO:0005925,focal adhesion|GO:0043227,membrane-bounded organelle|GO:0043226,organelle|GO:0030054,cell junction|GO:0030055,cell-substrate junction|GO:0005737,cytoplasm|GO:0005634,nucleus|GO:0016…	GO:0003676,nucleic acid binding|GO:0008026,ATP-dependent helicase activity|GO:0035639,purine ribonucleoside triphosphate binding|GO:0005488,binding|GO:0016887,ATPase activity|GO:0003677,DNA binding|GO:0003678,DNA helicase activity|GO:0008186,RNA-dependent ATPase activity|GO:0043167,ion binding|GO:1901363,heterocyclic compound binding|GO:0001883,purine nucleoside binding|GO:0001882,nucleoside bind…				http://www.uniprot.org/uniprot/Q13283	False
P29373	2.30857	1.207	P29373	CRABP2	GO:0035108,limb morphogenesis|GO:0080090,regulation of primary metabolic process|GO:0019222,regulation of metabolic process|GO:0048672,positive regulation of collateral sprouting|GO:0035107,appendage morphogenesis|GO:0007165,signal transduction|GO:0061387,regulation of extent of cell growth|GO:1901362,organic cyclic compound biosynthetic process|GO:0031344,regulation of cell projection organizati…	GO:0005783,endoplasmic reticulum|GO:0031974,membrane-enclosed lumen|GO:0043229,intracellular organelle|GO:0043227,membrane-bounded organelle|GO:0043226,organelle|GO:0005737,cytoplasm|GO:0070062,extracellular exosome|GO:0031981,nuclear lumen|GO:0005634,nucleus|GO:0031988,membrane-bounded vesicle|GO:0005654,nucleoplasm|GO:0012505,endomembrane system|GO:1903561,extracellular vesicle|GO:0031982,vesic…	GO:0043168,anion binding|GO:0005515,protein binding|GO:0043178,alcohol binding|GO:0043177,organic acid binding|GO:0005215,transporter activity|GO:0031406,carboxylic acid binding|GO:0019841,retinol binding|GO:0019842,vitamin binding|GO:0043167,ion binding|GO:0036094,small molecule binding|GO:0019840,isoprenoid binding|GO:0005488,binding|GO:0008289,lipid binding|GO:0001972,retinoic acid binding|GO:…				http://www.uniprot.org/uniprot/P29373	False
P07858	2.2958	1.199	P07858	CTSB	GO:0019222,regulation of metabolic process|GO:0048584,positive regulation of response to stimulus|GO:0048583,regulation of response to stimulus|GO:0031349,positive regulation of defense response|GO:0007165,signal transduction|GO:0031347,regulation of defense response|GO:0044712,single-organism catabolic process|GO:0044710,single-organism metabolic process|GO:0000003,reproduction|GO:0097066,respon…	GO:0098590,plasma membrane region|GO:0000323,lytic vacuole|GO:0009897,external side of plasma membrane|GO:0044421,extracellular region part|GO:0098552,side of membrane|GO:0048770,pigment granule|GO:0031974,membrane-enclosed lumen|GO:0005901,caveola|GO:0043229,intracellular organelle|GO:0043228,non-membrane-bounded organelle|GO:0005739,mitochondrion|GO:0005773,vacuole|GO:0044853,plasma membrane ra…	GO:0001948,glycoprotein binding|GO:0016787,hydrolase activity|GO:0004175,endopeptidase activity|GO:0042277,peptide binding|GO:0005515,protein binding|GO:0097367,carbohydrate derivative binding|GO:0033218,amide binding|GO:0070011,peptidase activity, acting on L-amino acid peptides|GO:0003824,catalytic activity|GO:0030984,kininogen binding|GO:0004197,cysteine-type endopeptidase activity|GO:0044877,…	hsa04612,Antigen processing and presentation|hsa04621,NOD-like receptor signaling pathway|hsa04140,Autophagy - animal|hsa04142,Lysosome|hsa04210,Apoptosis|hsa04924,Renin secretion			http://www.uniprot.org/uniprot/P07858	False
Q6P2Q9	2.29421	1.198	Q6P2Q9	PRPF8	GO:0022607,cellular component assembly|GO:0000244,spliceosomal tri-snRNP complex assembly|GO:0043933,macromolecular complex subunit organization|GO:0090304,nucleic acid metabolic process|GO:0034641,cellular nitrogen compound metabolic process|GO:0006807,nitrogen compound metabolic process|GO:0044237,cellular metabolic process|GO:0034622,cellular macromolecular complex assembly|GO:0071840,cellular…	GO:0031974,membrane-enclosed lumen|GO:0043229,intracellular organelle|GO:0043227,membrane-bounded organelle|GO:0043226,organelle|GO:0016607,nuclear speck|GO:0044446,intracellular organelle part|GO:0016604,nuclear body|GO:0031981,nuclear lumen|GO:0005634,nucleus|GO:0016020,membrane|GO:0030529,intracellular ribonucleoprotein complex|GO:0005654,nucleoplasm|GO:0044451,nucleoplasm part|GO:0071013,cata…	GO:0005488,binding|GO:0036002,pre-mRNA binding|GO:0000386,second spliceosomal transesterification activity|GO:0030619,U1 snRNA binding|GO:0005515,protein binding|GO:0097157,pre-mRNA intronic binding|GO:0030620,U2 snRNA binding|GO:0030623,U5 snRNA binding|GO:0031593,polyubiquitin binding|GO:0032182,ubiquitin-like protein binding|GO:1901363,heterocyclic compound binding|GO:0003824,catalytic activit…	hsa03040,Spliceosome			http://www.uniprot.org/uniprot/Q6P2Q9	False
Q96N66	2.25168	1.171	Q96N66	MBOAT7	GO:0021537,telencephalon development|GO:0044707,single-multicellular organism process|GO:0006650,glycerophospholipid metabolic process|GO:0048856,anatomical structure development|GO:0022030,telencephalon glial cell migration|GO:0006928,movement of cell or subcellular component|GO:0044249,cellular biosynthetic process|GO:0060322,head development|GO:0044281,small molecule metabolic process|GO:00218…	GO:0005783,endoplasmic reticulum|GO:0005789,endoplasmic reticulum membrane|GO:0042175,nuclear outer membrane-endoplasmic reticulum membrane network|GO:0043229,intracellular organelle|GO:0043227,membrane-bounded organelle|GO:0043226,organelle|GO:0031224,intrinsic component of membrane|GO:0005737,cytoplasm|GO:0031090,organelle membrane|GO:0016021,integral component of membrane|GO:0016020,membrane|G…	GO:0003824,catalytic activity|GO:0016740,transferase activity|GO:0016746,transferase activity, transferring acyl groups|GO:0016747,transferase activity, transferring acyl groups other than amino-acyl groups|GO:0005515,protein binding|GO:0071617,lysophospholipid acyltransferase activity|GO:0005488,binding|GO:0003841,1-acylglycerol-3-phosphate O-acyltransferase activity|GO:0042171,lysophosphatidic …	hsa00564,Glycerophospholipid metabolism			http://www.uniprot.org/uniprot/Q96N66	False
P13639	2.23612	1.161	P13639	EEF2	GO:0080090,regulation of primary metabolic process|GO:0019222,regulation of metabolic process|GO:0044710,single-organism metabolic process|GO:0044711,single-organism biosynthetic process|GO:0010604,positive regulation of macromolecule metabolic process|GO:0010608,posttranscriptional regulation of gene expression|GO:0043043,peptide biosynthetic process|GO:0002244,hematopoietic progenitor cell diff…	GO:0016234,inclusion body|GO:0016235,aggresome|GO:0043229,intracellular organelle|GO:0071944,cell periphery|GO:0030529,intracellular ribonucleoprotein complex|GO:0043227,membrane-bounded organelle|GO:0043226,organelle|GO:0005737,cytoplasm|GO:0031982,vesicle|GO:0005634,nucleus|GO:0016020,membrane|GO:0031988,membrane-bounded vesicle|GO:0005886,plasma membrane|GO:0032991,macromolecular complex|GO:19…	GO:0035639,purine ribonucleoside triphosphate binding|GO:0019899,enzyme binding|GO:0005488,binding|GO:0003676,nucleic acid binding|GO:0043167,ion binding|GO:1901363,heterocyclic compound binding|GO:0001883,purine nucleoside binding|GO:0001882,nucleoside binding|GO:0043168,anion binding|GO:0016462,pyrophosphatase activity|GO:0000166,nucleotide binding|GO:0032561,guanyl ribonucleotide binding|GO:19…	hsa04152,AMPK signaling pathway|hsa04921,Oxytocin signaling pathway			http://www.uniprot.org/uniprot/P13639	False
P23528	2.21914	1.15	P23528	CFL1	GO:0006909,phagocytosis|GO:0048584,positive regulation of response to stimulus|GO:0048583,regulation of response to stimulus|GO:0016358,dendrite development|GO:0008064,regulation of actin polymerization or depolymerization|GO:0007163,establishment or maintenance of cell polarity|GO:0007165,signal transduction|GO:0007166,cell surface receptor signaling pathway|GO:0007167,enzyme linked receptor pro…	GO:0098590,plasma membrane region|GO:0015629,actin cytoskeleton|GO:0044421,extracellular region part|GO:0031974,membrane-enclosed lumen|GO:0043229,intracellular organelle|GO:0043228,non-membrane-bounded organelle|GO:0005924,cell-substrate adherens junction|GO:0005925,focal adhesion|GO:0043227,membrane-bounded organelle|GO:0043226,organelle|GO:0030054,cell junction|GO:0030055,cell-substrate juncti…	GO:0003779,actin binding|GO:0005488,binding|GO:0005515,protein binding|GO:0008092,cytoskeletal protein binding|GO:0043168,anion binding|GO:0035091,phosphatidylinositol binding|GO:0005543,phospholipid binding|GO:0008289,lipid binding|GO:0051015,actin filament binding|GO:0043167,ion binding|GO:1902936,phosphatidylinositol bisphosphate binding|GO:0019903,protein phosphatase binding|GO:0019902,phosph…	hsa05133,Pertussis|hsa04360,Axon guidance|hsa05170,Human immunodeficiency virus 1 infection|hsa04666,Fc gamma R-mediated phagocytosis|hsa04810,Regulation of actin cytoskeleton			http://www.uniprot.org/uniprot/P23528	False
Q9P035	2.2176	1.149	Q9P035	HACD3	GO:0019220,regulation of phosphate metabolic process|GO:0080090,regulation of primary metabolic process|GO:0019222,regulation of metabolic process|GO:0048584,positive regulation of response to stimulus|GO:0048583,regulation of response to stimulus|GO:0032147,activation of protein kinase activity|GO:0007165,signal transduction|GO:0044283,small molecule biosynthetic process|GO:0042761,very long-cha…	GO:0005783,endoplasmic reticulum|GO:0005789,endoplasmic reticulum membrane|GO:0042175,nuclear outer membrane-endoplasmic reticulum membrane network|GO:0043229,intracellular organelle|GO:0005924,cell-substrate adherens junction|GO:0005925,focal adhesion|GO:0043227,membrane-bounded organelle|GO:0043226,organelle|GO:0031224,intrinsic component of membrane|GO:0030055,cell-substrate junction|GO:000573…	GO:0018812,3-hydroxyacyl-CoA dehydratase activity|GO:0003824,catalytic activity|GO:0016835,carbon-oxygen lyase activity|GO:0030234,enzyme regulator activity|GO:0016829,lyase activity|GO:0005096,GTPase activator activity|GO:0019899,enzyme binding|GO:0030695,GTPase regulator activity|GO:0008047,enzyme activator activity|GO:0005515,protein binding|GO:0098772,molecular function regulator|GO:0060589,n…	hsa00062,Fatty acid elongation|hsa01100,Metabolic pathways|hsa01212,Fatty acid metabolism|hsa01040,Biosynthesis of unsaturated fatty acids			http://www.uniprot.org/uniprot/Q9P035	False
P17174	2.19771	1.136	P17174	GOT1	GO:0044281,small molecule metabolic process|GO:0044282,small molecule catabolic process|GO:0044283,small molecule biosynthetic process|GO:0044712,single-organism catabolic process|GO:0044710,single-organism metabolic process|GO:0044711,single-organism biosynthetic process|GO:0019509,L-methionine salvage from methylthioadenosine|GO:0043650,dicarboxylic acid biosynthetic process|GO:0006071,glycerol…	GO:0000323,lytic vacuole|GO:0030424,axon|GO:0043229,intracellular organelle|GO:0005623,cell|GO:0043227,membrane-bounded organelle|GO:0043226,organelle|GO:0005737,cytoplasm|GO:0044306,neuron projection terminus|GO:0043679,axon terminus|GO:0005773,vacuole|GO:0005634,nucleus|GO:0031988,membrane-bounded vesicle|GO:0097458,neuron part|GO:0043005,neuron projection|GO:0042995,cell projection|GO:0031982,…	GO:0016830,carbon-carbon lyase activity|GO:0008483,transaminase activity|GO:0005488,binding|GO:0047801,L-cysteine:2-oxoglutarate aminotransferase activity|GO:1901363,heterocyclic compound binding|GO:0043168,anion binding|GO:0016829,lyase activity|GO:0043167,ion binding|GO:0004069,L-aspartate:2-oxoglutarate aminotransferase activity|GO:0016740,transferase activity|GO:0016769,transferase activity, …	hsa00330,Arginine and proline metabolism|hsa01200,Carbon metabolism|hsa00400,Phenylalanine, tyrosine and tryptophan biosynthesis|hsa01100,Metabolic pathways|hsa00250,Alanine, aspartate and glutamate metabolism|hsa00220,Arginine biosynthesis|hsa00360,Phenylalanine metabolism|hsa01230,Biosynthesis of amino acids|hsa00270,Cysteine and methionine metabolism|hsa00350,Tyrosine metabolism|hsa01210,2-Oxo…			http://www.uniprot.org/uniprot/P17174	False
P30101	2.19162	1.132	P30101	PDIA3	GO:2001235,positive regulation of apoptotic signaling pathway|GO:2001236,regulation of extrinsic apoptotic signaling pathway|GO:0008104,protein localization|GO:2001233,regulation of apoptotic signaling pathway|GO:0051049,regulation of transport|GO:0048584,positive regulation of response to stimulus|GO:2001238,positive regulation of extrinsic apoptotic signaling pathway|GO:0051169,nuclear transpor…	GO:0005783,endoplasmic reticulum|GO:0048770,pigment granule|GO:0031974,membrane-enclosed lumen|GO:0043229,intracellular organelle|GO:0005924,cell-substrate adherens junction|GO:0005925,focal adhesion|GO:0043227,membrane-bounded organelle|GO:0043226,organelle|GO:0030054,cell junction|GO:0030055,cell-substrate junction|GO:0005737,cytoplasm|GO:0012505,endomembrane system|GO:0070062,extracellular exo…	GO:0004175,endopeptidase activity|GO:0004197,cysteine-type endopeptidase activity|GO:0042578,phosphoric ester hydrolase activity|GO:0005488,binding|GO:0003676,nucleic acid binding|GO:0008233,peptidase activity|GO:0016864,intramolecular oxidoreductase activity, transposing S-S bonds|GO:0008234,cysteine-type peptidase activity|GO:0016860,intramolecular oxidoreductase activity|GO:0008081,phosphoric …	hsa04612,Antigen processing and presentation|hsa04141,Protein processing in endoplasmic reticulum|hsa05168,Herpes simplex virus 1 infection|hsa05169,Epstein-Barr virus infection|hsa05170,Human immunodeficiency virus 1 infection|hsa05163,Human cytomegalovirus infection			http://www.uniprot.org/uniprot/P30101	False
Q00059	2.19162	1.132	Q00059	TFAM	GO:0080090,regulation of primary metabolic process|GO:0019222,regulation of metabolic process|GO:1901362,organic cyclic compound biosynthetic process|GO:0071840,cellular component organization or biogenesis|GO:0044710,single-organism metabolic process|GO:0044711,single-organism biosynthetic process|GO:0010604,positive regulation of macromolecule metabolic process|GO:0006260,DNA replication|GO:000…	GO:0031974,membrane-enclosed lumen|GO:0043229,intracellular organelle|GO:0043228,non-membrane-bounded organelle|GO:0042645,mitochondrial nucleoid|GO:0043227,membrane-bounded organelle|GO:0009295,nucleoid|GO:0005737,cytoplasm|GO:0005634,nucleus|GO:0005739,mitochondrion|GO:0043226,organelle|GO:0005759,mitochondrial matrix|GO:0043231,intracellular membrane-bounded organelle|GO:0043232,intracellular …	GO:0031072,heat shock protein binding|GO:0001012,RNA polymerase II regulatory region DNA binding|GO:0001159,core promoter proximal region DNA binding|GO:0001077,transcriptional activator activity, RNA polymerase II core promoter proximal region sequence-specific binding|GO:0044877,macromolecular complex binding|GO:0005488,binding|GO:0003676,nucleic acid binding|GO:0003677,DNA binding|GO:1901363,h…	hsa05016,Huntington disease|hsa04371,Apelin signaling pathway			http://www.uniprot.org/uniprot/Q00059	False
Q86VP6	2.12138	1.085	Q86VP6	CAND1	GO:0080090,regulation of primary metabolic process|GO:0019222,regulation of metabolic process|GO:1901362,organic cyclic compound biosynthetic process|GO:0071840,cellular component organization or biogenesis|GO:0010604,positive regulation of macromolecule metabolic process|GO:0048869,cellular developmental process|GO:0070647,protein modification by small protein conjugation or removal|GO:0032446,p…	GO:0031974,membrane-enclosed lumen|GO:0043229,intracellular organelle|GO:0043227,membrane-bounded organelle|GO:0043226,organelle|GO:0005737,cytoplasm|GO:0070062,extracellular exosome|GO:0031981,nuclear lumen|GO:0005634,nucleus|GO:0016020,membrane|GO:0031988,membrane-bounded vesicle|GO:0005654,nucleoplasm|GO:0032991,macromolecular complex|GO:1902494,catalytic complex|GO:1990234,transferase complex…	GO:0017025,TBP-class protein binding|GO:0008134,transcription factor binding|GO:0005488,binding|GO:0005515,protein binding				http://www.uniprot.org/uniprot/Q86VP6	False
P36957	2.08782	1.062	P36957	DLST	GO:0006637,acyl-CoA metabolic process|GO:0019674,NAD metabolic process|GO:0006732,coenzyme metabolic process|GO:0006733,oxidoreduction coenzyme metabolic process|GO:0019752,carboxylic acid metabolic process|GO:0009063,cellular amino acid catabolic process|GO:0006099,tricarboxylic acid cycle|GO:0009060,aerobic respiration|GO:0009066,aspartate family amino acid metabolic process|GO:0044282,small mo…	GO:0045239,tricarboxylic acid cycle enzyme complex|GO:0031974,membrane-enclosed lumen|GO:1990204,oxidoreductase complex|GO:0043229,intracellular organelle|GO:0071944,cell periphery|GO:0045240,dihydrolipoyl dehydrogenase complex|GO:0043227,membrane-bounded organelle|GO:0043226,organelle|GO:0005737,cytoplasm|GO:0070062,extracellular exosome|GO:0043209,myelin sheath|GO:0005634,nucleus|GO:0016020,mem…	GO:0005515,protein binding|GO:0003824,catalytic activity|GO:0031072,heat shock protein binding|GO:0051087,chaperone binding|GO:0016751,S-succinyltransferase activity|GO:0016417,S-acyltransferase activity|GO:0016740,transferase activity|GO:0016746,transferase activity, transferring acyl groups|GO:0016747,transferase activity, transferring acyl groups other than amino-acyl groups|GO:0004149,dihydro…	hsa00310,Lysine degradation|hsa01200,Carbon metabolism|hsa01100,Metabolic pathways|hsa00380,Tryptophan metabolism|hsa00020,Citrate cycle (TCA cycle)			http://www.uniprot.org/uniprot/P36957	False
P04843	2.05908	1.042	P04843	RPN1	GO:0008104,protein localization|GO:0044237,cellular metabolic process|GO:0006613,cotranslational protein targeting to membrane|GO:0006612,protein targeting to membrane|GO:0006614,SRP-dependent cotranslational protein targeting to membrane|GO:1901564,organonitrogen compound metabolic process|GO:0061024,membrane organization|GO:0034641,cellular nitrogen compound metabolic process|GO:0006807,nitroge…	GO:0005783,endoplasmic reticulum|GO:0048770,pigment granule|GO:0005789,endoplasmic reticulum membrane|GO:0042175,nuclear outer membrane-endoplasmic reticulum membrane network|GO:0043229,intracellular organelle|GO:0043227,membrane-bounded organelle|GO:0043226,organelle|GO:0031224,intrinsic component of membrane|GO:0005737,cytoplasm|GO:0031982,vesicle|GO:0016023,cytoplasmic, membrane-bounded vesicl…	GO:0003676,nucleic acid binding|GO:0005515,protein binding|GO:0097159,organic cyclic compound binding|GO:0044822,poly(A) RNA binding|GO:0003824,catalytic activity|GO:0016740,transferase activity|GO:0004576,oligosaccharyl transferase activity|GO:0003723,RNA binding|GO:0016757,transferase activity, transferring glycosyl groups|GO:0016758,transferase activity, transferring hexosyl groups|GO:0004579,…	hsa04141,Protein processing in endoplasmic reticulum|hsa00513,Various types of N-glycan biosynthesis|hsa00510,N-Glycan biosynthesis|hsa01100,Metabolic pathways			http://www.uniprot.org/uniprot/P04843	False
P50991	2.05765	1.041	P50991	CCT4	GO:0006457,protein folding|GO:0006458,'de novo' protein folding|GO:0019953,sexual reproduction|GO:1901998,toxin transport|GO:0044699,single-organism process|GO:0044267,cellular protein metabolic process|GO:0000003,reproduction|GO:0044260,cellular macromolecule metabolic process|GO:0051084,'de novo' posttranslational protein folding|GO:0071704,organic substance metabolic process|GO:0008037,cell re…	GO:0048770,pigment granule|GO:0031974,membrane-enclosed lumen|GO:0043229,intracellular organelle|GO:0043228,non-membrane-bounded organelle|GO:0005815,microtubule organizing center|GO:0005874,microtubule|GO:0043226,organelle|GO:0005856,cytoskeleton|GO:0070062,extracellular exosome|GO:0031981,nuclear lumen|GO:0044445,cytosolic part|GO:0016023,cytoplasmic, membrane-bounded vesicle|GO:0031410,cytopla…	GO:0035639,purine ribonucleoside triphosphate binding|GO:0005488,binding|GO:0003676,nucleic acid binding|GO:0000166,nucleotide binding|GO:1901363,heterocyclic compound binding|GO:1901265,nucleoside phosphate binding|GO:0001882,nucleoside binding|GO:0043168,anion binding|GO:0051082,unfolded protein binding|GO:0043167,ion binding|GO:0001883,purine nucleoside binding|GO:0032549,ribonucleoside bindin…				http://www.uniprot.org/uniprot/P50991	False
A0A384N6C2	2.05338	1.038	P12268	IMPDH2	GO:0051289,protein homotetramerization|GO:0009167,purine ribonucleoside monophosphate metabolic process|GO:0009165,nucleotide biosynthetic process|GO:0009163,nucleoside biosynthetic process|GO:0009161,ribonucleoside monophosphate metabolic process|GO:1901362,organic cyclic compound biosynthetic process|GO:0042451,purine nucleoside biosynthetic process|GO:0071840,cellular component organization or…	GO:0044421,extracellular region part|GO:0042579,microbody|GO:0043229,intracellular organelle|GO:0043227,membrane-bounded organelle|GO:0043226,organelle|GO:0005737,cytoplasm|GO:0005778,peroxisomal membrane|GO:0031982,vesicle|GO:0005634,nucleus|GO:0016020,membrane|GO:0005777,peroxisome|GO:0031988,membrane-bounded vesicle|GO:0044439,peroxisomal part|GO:0044438,microbody part|GO:0031903,microbody mem…	GO:0005488,binding|GO:0043169,cation binding|GO:0016614,oxidoreductase activity, acting on CH-OH group of donors|GO:0005515,protein binding|GO:0016616,oxidoreductase activity, acting on the CH-OH group of donors, NAD or NADP as acceptor|GO:0003938,IMP dehydrogenase activity|GO:0097159,organic cyclic compound binding|GO:0043167,ion binding|GO:0000166,nucleotide binding|GO:0036094,small molecule bi…	hsa00983,Drug metabolism - other enzymes|hsa01100,Metabolic pathways|hsa00230,Purine metabolism		D00752,Mycophenolate mofetil (JAN/USAN); Cellcept (TN)|D01392,Mizoribine (JP16/INN); Bredinin (TN)|D04936,Merimepodib (USAN/INN)|D05094,Mycophenolate mofetil hydrochloride (USAN); Cellcept (TN)|D05095,Mycophenolate sodium (USAN)|D05096,Mycophenolic acid (USAN/INN); Myfortic (TN)	http://www.uniprot.org/uniprot/P12268	False
P28331	1.96292	0.973	P28331	NDUFS1	GO:0042391,regulation of membrane potential|GO:0009141,nucleoside triphosphate metabolic process|GO:0009144,purine nucleoside triphosphate metabolic process|GO:0009167,purine ribonucleoside monophosphate metabolic process|GO:0034641,cellular nitrogen compound metabolic process|GO:0006807,nitrogen compound metabolic process|GO:1901360,organic cyclic compound metabolic process|GO:0044281,small mole…	GO:0044464,cell part|GO:0031970,organelle envelope lumen|GO:0031974,membrane-enclosed lumen|GO:1990204,oxidoreductase complex|GO:0043229,intracellular organelle|GO:0043227,membrane-bounded organelle|GO:0043226,organelle|GO:0005737,cytoplasm|GO:0031090,organelle membrane|GO:0098796,membrane protein complex|GO:0043209,myelin sheath|GO:0016020,membrane|GO:0098803,respiratory chain complex|GO:0044444…	GO:0005488,binding|GO:0043169,cation binding|GO:0009055,electron carrier activity|GO:0051539,4 iron, 4 sulfur cluster binding|GO:0003824,catalytic activity|GO:0008137,NADH dehydrogenase (ubiquinone) activity|GO:0051536,iron-sulfur cluster binding|GO:0051537,2 iron, 2 sulfur cluster binding|GO:0043167,ion binding|GO:0016655,oxidoreductase activity, acting on NAD(P)H, quinone or similar compound as…	hsa00190,Oxidative phosphorylation|hsa04714,Thermogenesis|hsa01100,Metabolic pathways|hsa04723,Retrograde endocannabinoid signaling|hsa05012,Parkinson disease|hsa05016,Huntington disease|hsa05010,Alzheimer disease|hsa04932,Non-alcoholic fatty liver disease			http://www.uniprot.org/uniprot/P28331	False
P25788	1.95613	0.968	P25788	PSMA3	GO:0080090,regulation of primary metabolic process|GO:0019222,regulation of metabolic process|GO:0048585,negative regulation of response to stimulus|GO:0048584,positive regulation of response to stimulus|GO:0048583,regulation of response to stimulus|GO:0031349,positive regulation of defense response|GO:0030111,regulation of Wnt signaling pathway|GO:0007165,signal transduction|GO:0007166,cell surf…	GO:0019773,proteasome core complex, alpha-subunit complex|GO:0031974,membrane-enclosed lumen|GO:0043229,intracellular organelle|GO:0043227,membrane-bounded organelle|GO:0043226,organelle|GO:0005737,cytoplasm|GO:0005839,proteasome core complex|GO:0031981,nuclear lumen|GO:0005634,nucleus|GO:0031988,membrane-bounded vesicle|GO:0005654,nucleoplasm|GO:0032991,macromolecular complex|GO:0031982,vesicle|…	GO:0016787,hydrolase activity|GO:0004175,endopeptidase activity|GO:0004298,threonine-type endopeptidase activity|GO:0003824,catalytic activity|GO:0070003,threonine-type peptidase activity|GO:0070011,peptidase activity, acting on L-amino acid peptides|GO:0005488,binding|GO:0005515,protein binding|GO:0008233,peptidase activity|GO:0031625,ubiquitin protein ligase binding|GO:0044389,ubiquitin-like pr…	hsa03050,Proteasome			http://www.uniprot.org/uniprot/P25788	False
Q15019	1.87774	0.909	Q15019	SEPTIN2	GO:0008104,protein localization|GO:0019222,regulation of metabolic process|GO:0051049,regulation of transport|GO:0048468,cell development|GO:0006820,anion transport|GO:0007165,signal transduction|GO:0007166,cell surface receptor signaling pathway|GO:0071840,cellular component organization or biogenesis|GO:0051716,cellular response to stimulus|GO:0048869,cellular developmental process|GO:0051952,r…	GO:0098590,plasma membrane region|GO:0042995,cell projection|GO:0015629,actin cytoskeleton|GO:0060170,ciliary membrane|GO:0044464,cell part|GO:0000145,exocyst|GO:0031974,membrane-enclosed lumen|GO:0097610,cell surface furrow|GO:0043229,intracellular organelle|GO:0043228,non-membrane-bounded organelle|GO:0045202,synapse|GO:0005929,cilium|GO:0031513,nonmotile primary cilium|GO:0043227,membrane-boun…	GO:0035639,purine ribonucleoside triphosphate binding|GO:0032947,protein complex scaffold activity|GO:0043167,ion binding|GO:1901363,heterocyclic compound binding|GO:1901265,nucleoside phosphate binding|GO:0001882,nucleoside binding|GO:0043168,anion binding|GO:0098772,molecular function regulator|GO:0000166,nucleotide binding|GO:0032561,guanyl ribonucleotide binding|GO:0001883,purine nucleoside b…	hsa05100,Bacterial invasion of epithelial cells			http://www.uniprot.org/uniprot/Q15019	False
U5Z487	1.86995	0.903	U5Z487	COX2	GO:0019220,regulation of phosphate metabolic process|GO:0080090,regulation of primary metabolic process|GO:0019222,regulation of metabolic process|GO:0007595,lactation|GO:1903578,regulation of ATP metabolic process|GO:0009165,nucleotide biosynthetic process|GO:0044281,small molecule metabolic process|GO:0009161,ribonucleoside monophosphate metabolic process|GO:1901362,organic cyclic compound bios…	GO:0044464,cell part|GO:0031975,envelope|GO:0043229,intracellular organelle|GO:0043227,membrane-bounded organelle|GO:0043226,organelle|GO:0031224,intrinsic component of membrane|GO:0005737,cytoplasm|GO:0031090,organelle membrane|GO:0016021,integral component of membrane|GO:0016020,membrane|GO:0044444,cytoplasmic part|GO:0005739,mitochondrion|GO:0031967,organelle envelope|GO:0031966,mitochondrial …	GO:0005488,binding|GO:0016491,oxidoreductase activity|GO:0043169,cation binding|GO:0046914,transition metal ion binding|GO:0015077,monovalent inorganic cation transmembrane transporter activity|GO:0043167,ion binding|GO:0046872,metal ion binding|GO:0015002,heme-copper terminal oxidase activity|GO:0004129,cytochrome-c oxidase activity|GO:0005215,transporter activity|GO:0008324,cation transmembrane…				http://www.uniprot.org/uniprot/U5Z487	False
O75083	1.84165	0.881	O75083	WDR1	GO:0007599,hemostasis|GO:0051049,regulation of transport|GO:0007596,blood coagulation|GO:0048468,cell development|GO:0008064,regulation of actin polymerization or depolymerization|GO:0034765,regulation of ion transmembrane transport|GO:0034762,regulation of transmembrane transport|GO:0048869,cellular developmental process|GO:0051495,positive regulation of cytoskeleton organization|GO:0051493,regu…	GO:0042995,cell projection|GO:0015629,actin cytoskeleton|GO:0043229,intracellular organelle|GO:0043228,non-membrane-bounded organelle|GO:0043227,membrane-bounded organelle|GO:0043226,organelle|GO:0030054,cell junction|GO:0005856,cytoskeleton|GO:0002102,podosome|GO:0031982,vesicle|GO:0043209,myelin sheath|GO:0031988,membrane-bounded vesicle|GO:0044430,cytoskeletal part|GO:0005737,cytoplasm|GO:0005…	GO:0003779,actin binding|GO:0005488,binding|GO:0005515,protein binding|GO:0008092,cytoskeletal protein binding|GO:0051015,actin filament binding|GO:0044877,macromolecular complex binding|GO:0032403,protein complex binding				http://www.uniprot.org/uniprot/O75083	False
P23368	1.83655	0.877	P23368	ME2	GO:0006739,NADP metabolic process|GO:0019220,regulation of phosphate metabolic process|GO:0080090,regulation of primary metabolic process|GO:0019222,regulation of metabolic process|GO:0006732,coenzyme metabolic process|GO:0006733,oxidoreduction coenzyme metabolic process|GO:0031323,regulation of cellular metabolic process|GO:0019752,carboxylic acid metabolic process|GO:0034641,cellular nitrogen c…	GO:0005737,cytoplasm|GO:0043231,intracellular membrane-bounded organelle|GO:0043233,organelle lumen|GO:0044464,cell part|GO:0044444,cytoplasmic part|GO:0031974,membrane-enclosed lumen|GO:0005622,intracellular|GO:0044446,intracellular organelle part|GO:0070013,intracellular organelle lumen|GO:0043229,intracellular organelle|GO:0005739,mitochondrion|GO:0044429,mitochondrial part|GO:0005759,mitochon…	GO:0051287,NAD binding|GO:0008948,oxaloacetate decarboxylase activity|GO:0005488,binding|GO:0000166,nucleotide binding|GO:1901363,heterocyclic compound binding|GO:1901265,nucleoside phosphate binding|GO:0016491,oxidoreductase activity|GO:0043169,cation binding|GO:0016829,lyase activity|GO:0043167,ion binding|GO:0046872,metal ion binding|GO:0050662,coenzyme binding|GO:0036094,small molecule bindin…	hsa00620,Pyruvate metabolism|hsa01200,Carbon metabolism			http://www.uniprot.org/uniprot/P23368	False
Q16555	1.77276	0.826	Q16555	DPYSL2	GO:0048675,axon extension|GO:0048589,developmental growth|GO:0051047,positive regulation of secretion|GO:0051049,regulation of transport|GO:0048468,cell development|GO:0021510,spinal cord development|GO:0006820,anion transport|GO:0060322,head development|GO:0007165,signal transduction|GO:0051641,cellular localization|GO:0061387,regulation of extent of cell growth|GO:0031344,regulation of cell pro…	GO:0042995,cell projection|GO:0030427,site of polarized growth|GO:0030426,growth cone|GO:0030425,dendrite|GO:0030424,axon|GO:0043229,intracellular organelle|GO:0043228,non-membrane-bounded organelle|GO:0045202,synapse|GO:0005874,microtubule|GO:0043226,organelle|GO:0005856,cytoskeleton|GO:0043679,axon terminus|GO:0044306,neuron projection terminus|GO:0070062,extracellular exosome|GO:0043209,myelin…	GO:0016787,hydrolase activity|GO:0015631,tubulin binding|GO:0019900,kinase binding|GO:0008092,cytoskeletal protein binding|GO:0016812,hydrolase activity, acting on carbon-nitrogen (but not peptide) bonds, in cyclic amides|GO:0016810,hydrolase activity, acting on carbon-nitrogen (but not peptide) bonds|GO:0019899,enzyme binding|GO:0019901,protein kinase binding|GO:0003824,catalytic activity|GO:004…	hsa04360,Axon guidance			http://www.uniprot.org/uniprot/Q16555	False
Q12907	1.76174	0.817	Q12907	LMAN2	GO:0008104,protein localization|GO:0006909,phagocytosis|GO:0050794,regulation of cellular process|GO:0051049,regulation of transport|GO:0051128,regulation of cellular component organization|GO:0050789,regulation of biological process|GO:0044699,single-organism process|GO:0050766,positive regulation of phagocytosis|GO:0050764,regulation of phagocytosis|GO:0051234,establishment of localization|GO:0…	GO:0005783,endoplasmic reticulum|GO:0033116,endoplasmic reticulum-Golgi intermediate compartment membrane|GO:0005789,endoplasmic reticulum membrane|GO:0042175,nuclear outer membrane-endoplasmic reticulum membrane network|GO:0043229,intracellular organelle|GO:0071944,cell periphery|GO:0005622,intracellular|GO:0043227,membrane-bounded organelle|GO:0043226,organelle|GO:0031224,intrinsic component of…	GO:0001948,glycoprotein binding|GO:0043169,cation binding|GO:0097367,carbohydrate derivative binding|GO:0031072,heat shock protein binding|GO:0030246,carbohydrate binding|GO:0043167,ion binding|GO:0048029,monosaccharide binding|GO:0005515,protein binding|GO:0046872,metal ion binding|GO:0005537,mannose binding|GO:0005488,binding|GO:0036094,small molecule binding	hsa04141,Protein processing in endoplasmic reticulum			http://www.uniprot.org/uniprot/Q12907	False
P51648	1.76174	0.817	P51648	ALDH3A2	GO:0006714,sesquiterpenoid metabolic process|GO:0044281,small molecule metabolic process|GO:0008544,epidermis development|GO:0044255,cellular lipid metabolic process|GO:0007275,multicellular organism development|GO:0044699,single-organism process|GO:0007417,central nervous system development|GO:0044710,single-organism metabolic process|GO:0071704,organic substance metabolic process|GO:0016101,dit…	GO:0005783,endoplasmic reticulum|GO:0044464,cell part|GO:0031090,organelle membrane|GO:0005789,endoplasmic reticulum membrane|GO:0042579,microbody|GO:0043229,intracellular organelle|GO:0043227,membrane-bounded organelle|GO:0043226,organelle|GO:0031224,intrinsic component of membrane|GO:0005737,cytoplasm|GO:0031982,vesicle|GO:0031975,envelope|GO:0016021,integral component of membrane|GO:0016020,me…	GO:0046577,long-chain-alcohol oxidase activity|GO:0016614,oxidoreductase activity, acting on CH-OH group of donors|GO:0004029,aldehyde dehydrogenase (NAD) activity|GO:0016620,oxidoreductase activity, acting on the aldehyde or oxo group of donors, NAD or NADP as acceptor|GO:0003824,catalytic activity|GO:0004030,aldehyde dehydrogenase [NAD(P)+] activity|GO:0050061,long-chain-aldehyde dehydrogenase …	hsa00310,Lysine degradation|hsa00561,Glycerolipid metabolism|hsa00380,Tryptophan metabolism|hsa00330,Arginine and proline metabolism|hsa00620,Pyruvate metabolism|hsa00410,beta-Alanine metabolism|hsa00071,Fatty acid degradation|hsa00280,Valine, leucine and isoleucine degradation|hsa00053,Ascorbate and aldarate metabolism|hsa00010,Glycolysis / Gluconeogenesis|hsa01100,Metabolic pathways|hsa00340,Hi…		D00123,Cyanamide (JP16); Cyanamide (TN)|D00131,Disulfiram (JP16/USP/INN); Antabuse (TN)	http://www.uniprot.org/uniprot/P51648	False
P15880	1.69114	0.758	P15880	RPS2	GO:0008104,protein localization|GO:0019222,regulation of metabolic process|GO:0061024,membrane organization|GO:1901362,organic cyclic compound biosynthetic process|GO:1901360,organic cyclic compound metabolic process|GO:1901361,organic cyclic compound catabolic process|GO:0070727,cellular macromolecule localization|GO:0043043,peptide biosynthetic process|GO:0044419,interspecies interaction betwee…	GO:0022626,cytosolic ribosome|GO:0022627,cytosolic small ribosomal subunit|GO:0031974,membrane-enclosed lumen|GO:0043229,intracellular organelle|GO:0043228,non-membrane-bounded organelle|GO:0005924,cell-substrate adherens junction|GO:0005925,focal adhesion|GO:0043227,membrane-bounded organelle|GO:0043226,organelle|GO:0030054,cell junction|GO:0015935,small ribosomal subunit|GO:0005737,cytoplasm|GO…	GO:0005488,binding|GO:0019899,enzyme binding|GO:0005515,protein binding|GO:0097159,organic cyclic compound binding|GO:0044822,poly(A) RNA binding|GO:0019838,growth factor binding|GO:0017134,fibroblast growth factor binding|GO:0005198,structural molecule activity|GO:0003735,structural constituent of ribosome|GO:0003723,RNA binding|GO:0003676,nucleic acid binding|GO:1901363,heterocyclic compound bi…	hsa03010,Ribosome			http://www.uniprot.org/uniprot/P15880	False
A0FGR8	1.56049	0.642	A0FGR8	ESYT2	GO:0033036,macromolecule localization|GO:0006897,endocytosis|GO:0016192,vesicle-mediated transport|GO:0006869,lipid transport|GO:0006810,transport|GO:0044765,single-organism transport|GO:1902578,single-organism localization|GO:0071702,organic substance transport|GO:0051234,establishment of localization|GO:0010876,lipid localization|GO:0051179,localization|GO:0044699,single-organism process|GO:000…	GO:0019897,extrinsic component of plasma membrane|GO:0005783,endoplasmic reticulum|GO:0009898,cytoplasmic side of plasma membrane|GO:0005789,endoplasmic reticulum membrane|GO:0042175,nuclear outer membrane-endoplasmic reticulum membrane network|GO:0043229,intracellular organelle|GO:0071944,cell periphery|GO:0031300,intrinsic component of organelle membrane|GO:0098552,side of membrane|GO:0031226,i…	GO:0043168,anion binding|GO:0043169,cation binding|GO:0008429,phosphatidylethanolamine binding|GO:0043178,alcohol binding|GO:0035091,phosphatidylinositol binding|GO:0005543,phospholipid binding|GO:0005544,calcium-dependent phospholipid binding|GO:0008289,lipid binding|GO:0050997,quaternary ammonium group binding|GO:0043167,ion binding|GO:0070405,ammonium ion binding|GO:0031210,phosphatidylcholine…				http://www.uniprot.org/uniprot/A0FGR8	False
P98160	0.65884	-0.602	P98160	HSPG2	GO:0008104,protein localization|GO:0001501,skeletal system development|GO:0072359,circulatory system development|GO:0001503,ossification|GO:0007165,signal transduction|GO:0071840,cellular component organization or biogenesis|GO:0044710,single-organism metabolic process|GO:0044711,single-organism biosynthetic process|GO:0048869,cellular developmental process|GO:0048513,animal organ development|GO:…	GO:0000323,lytic vacuole|GO:0044421,extracellular region part|GO:0031974,membrane-enclosed lumen|GO:0031012,extracellular matrix|GO:0043229,intracellular organelle|GO:0071944,cell periphery|GO:0005924,cell-substrate adherens junction|GO:0005925,focal adhesion|GO:0043227,membrane-bounded organelle|GO:0043226,organelle|GO:0030054,cell junction|GO:0030055,cell-substrate junction|GO:0005737,cytoplasm…	GO:0043169,cation binding|GO:0008022,protein C-terminus binding|GO:0043167,ion binding|GO:0005488,binding|GO:0005515,protein binding|GO:0046872,metal ion binding|GO:0070325,lipoprotein particle receptor binding|GO:0005509,calcium ion binding|GO:0005102,receptor binding|GO:0050750,low-density lipoprotein particle receptor binding|GO:0005178,integrin binding|GO:0005201,extracellular matrix structur…	hsa05205,Proteoglycans in cancer|hsa04512,ECM-receptor interaction|hsa05161,Hepatitis B			http://www.uniprot.org/uniprot/P98160	False
Q6NZI2	0.623301	-0.682	Q6NZI2	CAVIN1	GO:0080090,regulation of primary metabolic process|GO:0019222,regulation of metabolic process|GO:0031326,regulation of cellular biosynthetic process|GO:0031323,regulation of cellular metabolic process|GO:0090304,nucleic acid metabolic process|GO:0044249,cellular biosynthetic process|GO:0034641,cellular nitrogen compound metabolic process|GO:0006807,nitrogen compound metabolic process|GO:0034645,c…	GO:0098590,plasma membrane region|GO:0005783,endoplasmic reticulum|GO:0031974,membrane-enclosed lumen|GO:0005901,caveola|GO:0043229,intracellular organelle|GO:0071944,cell periphery|GO:0044853,plasma membrane raft|GO:0043227,membrane-bounded organelle|GO:0043226,organelle|GO:0005737,cytoplasm|GO:0031981,nuclear lumen|GO:0005634,nucleus|GO:0016020,membrane|GO:0005739,mitochondrion|GO:0005654,nucle…	GO:0042134,rRNA primary transcript binding|GO:0005515,protein binding|GO:0097159,organic cyclic compound binding|GO:0044822,poly(A) RNA binding|GO:0019843,rRNA binding|GO:0003723,RNA binding|GO:0003676,nucleic acid binding|GO:1901363,heterocyclic compound binding|GO:0005488,binding|GO:0042802,identical protein binding				http://www.uniprot.org/uniprot/Q6NZI2	False
P02774	0.614719	-0.702	P02774	GC	GO:0009991,response to extracellular stimulus|GO:0006775,fat-soluble vitamin metabolic process|GO:0007595,lactation|GO:0032355,response to estradiol|GO:0014070,response to organic cyclic compound|GO:0032941,secretion by tissue|GO:0044281,small molecule metabolic process|GO:0007275,multicellular organism development|GO:0044699,single-organism process|GO:0009719,response to endogenous stimulus|GO:0…	GO:0042995,cell projection|GO:0000323,lytic vacuole|GO:0031974,membrane-enclosed lumen|GO:0030424,axon|GO:0043229,intracellular organelle|GO:0072562,blood microparticle|GO:0043227,membrane-bounded organelle|GO:0043226,organelle|GO:0005737,cytoplasm|GO:0044446,intracellular organelle part|GO:0043202,lysosomal lumen|GO:0070062,extracellular exosome|GO:0005773,vacuole|GO:0005615,extracellular space|…	GO:0003779,actin binding|GO:1902271,D3 vitamins binding|GO:0051183,vitamin transporter activity|GO:0043178,alcohol binding|GO:0005215,transporter activity|GO:0008092,cytoskeletal protein binding|GO:0008289,lipid binding|GO:0019842,vitamin binding|GO:0036094,small molecule binding|GO:0005496,steroid binding|GO:0005488,binding|GO:0005515,protein binding|GO:0005499,vitamin D binding|GO:1902118,calci…				http://www.uniprot.org/uniprot/P02774	False
P40939	0.581963	-0.781	P40939	HADHA	GO:0034440,lipid oxidation|GO:0006631,fatty acid metabolic process|GO:0006650,glycerophospholipid metabolic process|GO:0006635,fatty acid beta-oxidation|GO:0050896,response to stimulus|GO:0032048,cardiolipin metabolic process|GO:0019752,carboxylic acid metabolic process|GO:0044248,cellular catabolic process|GO:0009062,fatty acid catabolic process|GO:0044281,small molecule metabolic process|GO:004…	GO:0044464,cell part|GO:0031974,membrane-enclosed lumen|GO:0031975,envelope|GO:0043229,intracellular organelle|GO:0043228,non-membrane-bounded organelle|GO:0042645,mitochondrial nucleoid|GO:0043227,membrane-bounded organelle|GO:0043226,organelle|GO:0005737,cytoplasm|GO:0031090,organelle membrane|GO:0070013,intracellular organelle lumen|GO:0036125,fatty acid beta-oxidation multienzyme complex|GO:0…	GO:0051287,NAD binding|GO:0044877,macromolecular complex binding|GO:0005488,binding|GO:0003857,3-hydroxyacyl-CoA dehydrogenase activity|GO:1901363,heterocyclic compound binding|GO:1901265,nucleoside phosphate binding|GO:0016491,oxidoreductase activity|GO:1901681,sulfur compound binding|GO:0050662,coenzyme binding|GO:0016829,lyase activity|GO:0000062,fatty-acyl-CoA binding|GO:0000166,nucleotide bi…	hsa00310,Lysine degradation|hsa00062,Fatty acid elongation|hsa01100,Metabolic pathways|hsa00071,Fatty acid degradation|hsa01200,Carbon metabolism|hsa00280,Valine, leucine and isoleucine degradation|hsa00640,Propanoate metabolism|hsa00380,Tryptophan metabolism|hsa01212,Fatty acid metabolism|hsa00650,Butanoate metabolism|hsa00410,beta-Alanine metabolism			http://www.uniprot.org/uniprot/P40939	False
A0A024R8Z1	0.530712	-0.914	A0A024R8Z1	MGST3	GO:0050896,response to stimulus|GO:0010033,response to organic substance|GO:0010243,response to organonitrogen compound|GO:0042221,response to chemical|GO:1901698,response to nitrogen compound	GO:0044425,membrane part|GO:0016021,integral component of membrane|GO:0016020,membrane|GO:0031224,intrinsic component of membrane	GO:0016209,antioxidant activity|GO:0003824,catalytic activity|GO:0016740,transferase activity|GO:0016684,oxidoreductase activity, acting on peroxide as acceptor|GO:0004601,peroxidase activity|GO:0004602,glutathione peroxidase activity|GO:0016491,oxidoreductase activity				http://www.uniprot.org/uniprot/A0A024R8Z1	False
P62269	0.520872	-0.941	P62269	RPS18	GO:0008104,protein localization|GO:0061024,membrane organization|GO:1901362,organic cyclic compound biosynthetic process|GO:1901360,organic cyclic compound metabolic process|GO:1901361,organic cyclic compound catabolic process|GO:0070727,cellular macromolecule localization|GO:0043043,peptide biosynthetic process|GO:0044419,interspecies interaction between organisms|GO:0019058,viral life cycle|GO:…	GO:0022626,cytosolic ribosome|GO:0022627,cytosolic small ribosomal subunit|GO:0043229,intracellular organelle|GO:0043228,non-membrane-bounded organelle|GO:0005924,cell-substrate adherens junction|GO:0005925,focal adhesion|GO:0043227,membrane-bounded organelle|GO:0043226,organelle|GO:0030054,cell junction|GO:0015935,small ribosomal subunit|GO:0005737,cytoplasm|GO:0031982,vesicle|GO:0005634,nucleus…	GO:0005515,protein binding|GO:0097159,organic cyclic compound binding|GO:0044822,poly(A) RNA binding|GO:0019843,rRNA binding|GO:0003735,structural constituent of ribosome|GO:0003723,RNA binding|GO:0003676,nucleic acid binding|GO:0005198,structural molecule activity|GO:1901363,heterocyclic compound binding|GO:0005488,binding|GO:0019901,protein kinase binding|GO:0019899,enzyme binding|GO:0019900,ki…	hsa03010,Ribosome			http://www.uniprot.org/uniprot/P62269	False
Q969G5	0.510506	-0.97	Q969G5	CAVIN3	GO:0032922,circadian regulation of gene expression|GO:0019220,regulation of phosphate metabolic process|GO:0080090,regulation of primary metabolic process|GO:0019222,regulation of metabolic process|GO:0048585,negative regulation of response to stimulus|GO:0048584,positive regulation of response to stimulus|GO:0048583,regulation of response to stimulus|GO:0051898,negative regulation of protein kin…	GO:0043234,protein complex|GO:0098590,plasma membrane region|GO:0098589,membrane region|GO:0032991,macromolecular complex|GO:0098805,whole membrane|GO:0045121,membrane raft|GO:0044464,cell part|GO:0005623,cell|GO:0005737,cytoplasm|GO:0016020,membrane|GO:0005901,caveola|GO:0071944,cell periphery|GO:0005886,plasma membrane|GO:0044424,intracellular part|GO:0044425,membrane part|GO:0044853,plasma mem…	GO:0005080,protein kinase C binding|GO:0019899,enzyme binding|GO:0019901,protein kinase binding|GO:0019900,kinase binding|GO:0005488,binding|GO:0005515,protein binding				http://www.uniprot.org/uniprot/Q969G5	False
P06733	0.507331	-0.979	P06733	ENO1	GO:0080090,regulation of primary metabolic process|GO:0019222,regulation of metabolic process|GO:0009167,purine ribonucleoside monophosphate metabolic process|GO:0061621,canonical glycolysis|GO:0061620,glycolytic process through glucose-6-phosphate|GO:0044281,small molecule metabolic process|GO:0009161,ribonucleoside monophosphate metabolic process|GO:1901362,organic cyclic compound biosynthetic …	GO:0031672,A band|GO:0030016,myofibril|GO:0030017,sarcomere|GO:0043229,intracellular organelle|GO:0043228,non-membrane-bounded organelle|GO:0043227,membrane-bounded organelle|GO:0043226,organelle|GO:0005737,cytoplasm|GO:0031430,M band|GO:0031982,vesicle|GO:0005615,extracellular space|GO:0005634,nucleus|GO:0016020,membrane|GO:0031988,membrane-bounded vesicle|GO:0005576,extracellular region|GO:0043…	GO:0000287,magnesium ion binding|GO:0019899,enzyme binding|GO:0051020,GTPase binding|GO:0005488,binding|GO:0003676,nucleic acid binding|GO:0003677,DNA binding|GO:1901363,heterocyclic compound binding|GO:0043169,cation binding|GO:0016829,lyase activity|GO:0003714,transcription corepressor activity|GO:0003712,transcription cofactor activity|GO:0043167,ion binding|GO:0000989,transcription factor act…	hsa01100,Metabolic pathways|hsa01200,Carbon metabolism|hsa04066,HIF-1 signaling pathway|hsa01230,Biosynthesis of amino acids|hsa00010,Glycolysis / Gluconeogenesis|hsa03018,RNA degradation			http://www.uniprot.org/uniprot/P06733	False
Q9Y678	0.47533	-1.073	Q9Y678	COPG1	GO:0008104,protein localization|GO:0048200,Golgi transport vesicle coating|GO:0072384,organelle transport along microtubule|GO:0051649,establishment of localization in cell|GO:0006901,vesicle coating|GO:0048205,COPI coating of Golgi vesicle|GO:0006903,vesicle targeting|GO:0006928,movement of cell or subcellular component|GO:0061024,membrane organization|GO:0051640,organelle localization|GO:005165…	GO:0043229,intracellular organelle|GO:0030117,membrane coat|GO:0005622,intracellular|GO:0030135,coated vesicle|GO:0043226,organelle|GO:0030137,COPI-coated vesicle|GO:0005737,cytoplasm|GO:0030660,Golgi-associated vesicle membrane|GO:0030663,COPI-coated vesicle membrane|GO:0030662,coated vesicle membrane|GO:0016023,cytoplasmic, membrane-bounded vesicle|GO:0031410,cytoplasmic vesicle|GO:0098805,whol…	GO:0005488,binding|GO:0005515,protein binding|GO:0005198,structural molecule activity				http://www.uniprot.org/uniprot/Q9Y678	False
P02652	0.459456	-1.122	P02652	APOA2	GO:1901566,organonitrogen compound biosynthetic process|GO:0008104,protein localization|GO:0080090,regulation of primary metabolic process|GO:0019222,regulation of metabolic process|GO:0046340,diacylglycerol catabolic process|GO:0051048,negative regulation of secretion|GO:0051049,regulation of transport|GO:0048585,negative regulation of response to stimulus|GO:0048583,regulation of response to st…	GO:0005783,endoplasmic reticulum|GO:0044421,extracellular region part|GO:0031974,membrane-enclosed lumen|GO:0043229,intracellular organelle|GO:1990777,lipoprotein particle|GO:0005622,intracellular|GO:0043227,membrane-bounded organelle|GO:0043226,organelle|GO:0034358,plasma lipoprotein particle|GO:0005737,cytoplasm|GO:0042627,chylomicron|GO:0070062,extracellular exosome|GO:0005615,extracellular sp…	GO:0017127,cholesterol transporter activity|GO:0044877,macromolecular complex binding|GO:0008047,enzyme activator activity|GO:0004857,enzyme inhibitor activity|GO:0098772,molecular function regulator|GO:0060228,phosphatidylcholine-sterol O-acyltransferase activator activity|GO:0034190,apolipoprotein receptor binding|GO:0043168,anion binding|GO:0043169,cation binding|GO:0055102,lipase inhibitor ac…	hsa04979,Cholesterol metabolism|hsa03320,PPAR signaling pathway			http://www.uniprot.org/uniprot/P02652	False
P53396	0.450001	-1.152	P53396	ACLY	GO:0019222,regulation of metabolic process|GO:0044281,small molecule metabolic process|GO:0044283,small molecule biosynthetic process|GO:0072350,tricarboxylic acid metabolic process|GO:1901360,organic cyclic compound metabolic process|GO:0044710,single-organism metabolic process|GO:0044711,single-organism biosynthetic process|GO:0055086,nucleobase-containing small molecule metabolic process|GO:00…	GO:0031974,membrane-enclosed lumen|GO:0043229,intracellular organelle|GO:0071944,cell periphery|GO:0043227,membrane-bounded organelle|GO:0043226,organelle|GO:0005737,cytoplasm|GO:0070062,extracellular exosome|GO:0031981,nuclear lumen|GO:0005634,nucleus|GO:0016020,membrane|GO:0005739,mitochondrion|GO:0031988,membrane-bounded vesicle|GO:0005654,nucleoplasm|GO:0009346,citrate lyase complex|GO:000588…	GO:0035639,purine ribonucleoside triphosphate binding|GO:0003878,ATP citrate synthase activity|GO:0005488,binding|GO:0043167,ion binding|GO:1901363,heterocyclic compound binding|GO:1901265,nucleoside phosphate binding|GO:0001882,nucleoside binding|GO:0046912,transferase activity, transferring acyl groups, acyl groups converted into alkyl on transfer|GO:0043169,cation binding|GO:0000166,nucleotide…	hsa01100,Metabolic pathways|hsa00020,Citrate cycle (TCA cycle)		D10691,Bempedoic acid (USAN/INN)	http://www.uniprot.org/uniprot/P53396	False
P62266	0.437392	-1.193	P62266	RPS23	GO:0008104,protein localization|GO:0061024,membrane organization|GO:1901362,organic cyclic compound biosynthetic process|GO:1901360,organic cyclic compound metabolic process|GO:1901361,organic cyclic compound catabolic process|GO:0070727,cellular macromolecule localization|GO:0043043,peptide biosynthetic process|GO:0044419,interspecies interaction between organisms|GO:0019058,viral life cycle|GO:…	GO:0022626,cytosolic ribosome|GO:0022627,cytosolic small ribosomal subunit|GO:0031974,membrane-enclosed lumen|GO:0043229,intracellular organelle|GO:0043228,non-membrane-bounded organelle|GO:0043227,membrane-bounded organelle|GO:0043226,organelle|GO:0015935,small ribosomal subunit|GO:0005737,cytoplasm|GO:0031981,nuclear lumen|GO:0005730,nucleolus|GO:0005634,nucleus|GO:0016020,membrane|GO:0030529,i…	GO:0005515,protein binding|GO:0097159,organic cyclic compound binding|GO:0044822,poly(A) RNA binding|GO:0005198,structural molecule activity|GO:0003735,structural constituent of ribosome|GO:0003723,RNA binding|GO:0003676,nucleic acid binding|GO:1901363,heterocyclic compound binding|GO:0005488,binding	hsa03010,Ribosome			http://www.uniprot.org/uniprot/P62266	False
P35579	0.4222	-1.244	P35579	MYH9	GO:0008104,protein localization|GO:0006909,phagocytosis|GO:0080090,regulation of primary metabolic process|GO:0019222,regulation of metabolic process|GO:0030224,monocyte differentiation|GO:0048585,negative regulation of response to stimulus|GO:0007596,blood coagulation|GO:0048583,regulation of response to stimulus|GO:0030220,platelet formation|GO:0061024,membrane organization|GO:0008277,regulatio…	GO:0032432,actin filament bundle|GO:0005911,cell-cell junction|GO:0098636,protein complex involved in cell adhesion|GO:0016020,membrane|GO:0015629,actin cytoskeleton|GO:0030055,cell-substrate junction|GO:0005886,plasma membrane|GO:0097610,cell surface furrow|GO:0031594,neuromuscular junction|GO:0043229,intracellular organelle|GO:0043228,non-membrane-bounded organelle|GO:0045202,synapse|GO:0005887…	GO:0003676,nucleic acid binding|GO:0035639,purine ribonucleoside triphosphate binding|GO:0043495,protein anchor|GO:0044877,macromolecular complex binding|GO:0005488,binding|GO:0016887,ATPase activity|GO:0043167,ion binding|GO:1901363,heterocyclic compound binding|GO:0001883,purine nucleoside binding|GO:0001882,nucleoside binding|GO:0043168,anion binding|GO:0000146,microfilament motor activity|GO:…	hsa04530,Tight junction|hsa05130,Pathogenic Escherichia coli infection|hsa04810,Regulation of actin cytoskeleton			http://www.uniprot.org/uniprot/P35579	False
P02749	0.419284	-1.254	P02749	APOH	GO:0007599,hemostasis|GO:0019222,regulation of metabolic process|GO:0048585,negative regulation of response to stimulus|GO:0048584,positive regulation of response to stimulus|GO:0048583,regulation of response to stimulus|GO:0050680,negative regulation of epithelial cell proliferation|GO:0031638,zymogen activation|GO:0072359,circulatory system development|GO:0072358,cardiovascular system developme…	GO:0034358,plasma lipoprotein particle|GO:0031012,extracellular matrix|GO:1990777,lipoprotein particle|GO:0043227,membrane-bounded organelle|GO:0043226,organelle|GO:0042627,chylomicron|GO:0070062,extracellular exosome|GO:0031988,membrane-bounded vesicle|GO:0034361,very-low-density lipoprotein particle|GO:0034364,high-density lipoprotein particle|GO:0009986,cell surface|GO:0031982,vesicle|GO:00329…	GO:1901681,sulfur compound binding|GO:0043168,anion binding|GO:0005543,phospholipid binding|GO:0097367,carbohydrate derivative binding|GO:0030234,enzyme regulator activity|GO:0060230,lipoprotein lipase activator activity|GO:0008289,lipid binding|GO:0008201,heparin binding|GO:0005539,glycosaminoglycan binding|GO:0043167,ion binding|GO:0008047,enzyme activator activity|GO:0005515,protein binding|GO…	hsa04979,Cholesterol metabolism			http://www.uniprot.org/uniprot/P02749	False
P40121	0.417833	-1.259	P40121	CAPG	GO:0022607,cellular component assembly|GO:0006461,protein complex assembly|GO:0033043,regulation of organelle organization|GO:0030030,cell projection organization|GO:0030031,cell projection assembly|GO:1901879,regulation of protein depolymerization|GO:0051129,negative regulation of cellular component organization|GO:0051128,regulation of cellular component organization|GO:0008064,regulation of ac…	GO:0015629,actin cytoskeleton|GO:0044464,cell part|GO:0048770,pigment granule|GO:0031974,membrane-enclosed lumen|GO:0043229,intracellular organelle|GO:0043228,non-membrane-bounded organelle|GO:0031988,membrane-bounded vesicle|GO:0043227,membrane-bounded organelle|GO:0043226,organelle|GO:0005856,cytoskeleton|GO:0072686,mitotic spindle|GO:0070062,extracellular exosome|GO:0031981,nuclear lumen|GO:00…	GO:0008092,cytoskeletal protein binding|GO:0003779,actin binding|GO:0044877,macromolecular complex binding|GO:0019904,protein domain specific binding|GO:0005515,protein binding|GO:0032403,protein complex binding|GO:0005488,binding|GO:0051015,actin filament binding|GO:0045296,cadherin binding|GO:0050839,cell adhesion molecule binding				http://www.uniprot.org/uniprot/P40121	False
Q9UBG0	0.384219	-1.38	Q9UBG0	MRC2	GO:0044259,multicellular organismal macromolecule metabolic process|GO:0030154,cell differentiation|GO:0001503,ossification|GO:0032963,collagen metabolic process|GO:0043170,macromolecule metabolic process|GO:0044699,single-organism process|GO:0044712,single-organism catabolic process|GO:0044710,single-organism metabolic process|GO:0044243,multicellular organismal catabolic process|GO:0048869,cell…	GO:0016020,membrane|GO:0016021,integral component of membrane|GO:0070161,anchoring junction|GO:0031224,intrinsic component of membrane|GO:0005912,adherens junction|GO:0044425,membrane part|GO:0005924,cell-substrate adherens junction|GO:0005925,focal adhesion|GO:0030054,cell junction|GO:0030055,cell-substrate junction|GO:0044459,plasma membrane part|GO:0044464,cell part|GO:0005623,cell|GO:0071944,…	GO:0030246,carbohydrate binding|GO:0044877,macromolecular complex binding|GO:0005488,binding|GO:0005515,protein binding|GO:0032403,protein complex binding|GO:0005518,collagen binding|GO:0038023,signaling receptor activity|GO:0060089,molecular transducer activity|GO:0004888,transmembrane signaling receptor activity|GO:0004872,receptor activity|GO:0004871,signal transducer activity|GO:0099600,trans…	hsa04145,Phagosome|hsa05152,Tuberculosis			http://www.uniprot.org/uniprot/Q9UBG0	False
P19971	0.366783	-1.447	P19971	TYMP	GO:0009164,nucleoside catabolic process|GO:0072358,cardiovascular system development|GO:0009163,nucleoside biosynthetic process|GO:0046134,pyrimidine nucleoside biosynthetic process|GO:0046135,pyrimidine nucleoside catabolic process|GO:1901362,organic cyclic compound biosynthetic process|GO:0044707,single-multicellular organism process|GO:1901360,organic cyclic compound metabolic process|GO:19013…	GO:0005737,cytoplasm|GO:0005829,cytosol|GO:0044464,cell part|GO:0005623,cell|GO:0005622,intracellular|GO:0044444,cytoplasmic part|GO:0044424,intracellular part	GO:0070851,growth factor receptor binding|GO:0008083,growth factor activity|GO:0016154,pyrimidine-nucleoside phosphorylase activity|GO:0009032,thymidine phosphorylase activity|GO:0005161,platelet-derived growth factor receptor binding|GO:0004645,phosphorylase activity|GO:0003824,catalytic activity|GO:0016740,transferase activity|GO:0005515,protein binding|GO:0016757,transferase activity, transfer…	hsa00983,Drug metabolism - other enzymes|hsa05219,Bladder cancer|hsa01100,Metabolic pathways|hsa00240,Pyrimidine metabolism			http://www.uniprot.org/uniprot/P19971	False
Q9Y6C2	0.338681	-1.562	Q9Y6C2	EMILIN1	GO:0009987,cellular process|GO:0016043,cellular component organization|GO:0030198,extracellular matrix organization|GO:0044763,single-organism cellular process|GO:0044699,single-organism process|GO:0043062,extracellular structure organization|GO:0007155,cell adhesion|GO:0022610,biological adhesion|GO:0071840,cellular component organization or biogenesis|GO:0022607,cellular component assembly|GO:0…	GO:0043234,protein complex|GO:0043230,extracellular organelle|GO:0070062,extracellular exosome|GO:0044421,extracellular region part|GO:0043227,membrane-bounded organelle|GO:0031012,extracellular matrix|GO:0043226,organelle|GO:0032991,macromolecular complex|GO:0005576,extracellular region|GO:0005581,collagen trimer|GO:0031988,membrane-bounded vesicle|GO:1903561,extracellular vesicle|GO:0065010,ext…	GO:0005488,binding|GO:0005515,protein binding|GO:0098634,protein binding involved in cell-matrix adhesion|GO:0005178,integrin binding|GO:0005201,extracellular matrix structural constituent|GO:0098631,protein binding involved in cell adhesion|GO:0030023,extracellular matrix constituent conferring elasticity|GO:0005198,structural molecule activity|GO:0044877,macromolecular complex binding|GO:004280…				http://www.uniprot.org/uniprot/Q9Y6C2	False
P04040	0.326465	-1.615	P04040	CAT	GO:0009628,response to abiotic stimulus|GO:0080090,regulation of primary metabolic process|GO:0019222,regulation of metabolic process|GO:0051289,protein homotetramerization|GO:0051260,protein homooligomerization|GO:0048584,positive regulation of response to stimulus|GO:0048583,regulation of response to stimulus|GO:0009166,nucleotide catabolic process|GO:0001503,ossification|GO:0007165,signal tran…	GO:0005782,peroxisomal matrix|GO:0005783,endoplasmic reticulum|GO:0031970,organelle envelope lumen|GO:0031974,membrane-enclosed lumen|GO:0031975,envelope|GO:0042579,microbody|GO:0043229,intracellular organelle|GO:0071944,cell periphery|GO:0000323,lytic vacuole|GO:0005924,cell-substrate adherens junction|GO:0005925,focal adhesion|GO:0043227,membrane-bounded organelle|GO:0043226,organelle|GO:003005…	GO:0019899,enzyme binding|GO:0005488,binding|GO:0043167,ion binding|GO:1901363,heterocyclic compound binding|GO:1901265,nucleoside phosphate binding|GO:0016491,oxidoreductase activity|GO:0043169,cation binding|GO:0050661,NADP binding|GO:0000166,nucleotide binding|GO:0046872,metal ion binding|GO:0042802,identical protein binding|GO:0042803,protein homodimerization activity|GO:0004046,aminoacylase …	hsa01100,Metabolic pathways|hsa00630,Glyoxylate and dicarboxylate metabolism|hsa05014,Amyotrophic lateral sclerosis|hsa01200,Carbon metabolism|hsa04068,FoxO signaling pathway|hsa04146,Peroxisome|hsa04211,Longevity regulating pathway|hsa04213,Longevity regulating pathway - multiple species|hsa00380,Tryptophan metabolism			http://www.uniprot.org/uniprot/P04040	False
P00751	0.319303	-1.647	P00751	CFB	GO:0006954,inflammatory response|GO:0030449,regulation of complement activation|GO:0080090,regulation of primary metabolic process|GO:0019222,regulation of metabolic process|GO:0032101,regulation of response to external stimulus|GO:0048584,positive regulation of response to stimulus|GO:0048583,regulation of response to stimulus|GO:0009611,response to wounding|GO:0016485,protein processing|GO:0002…	GO:0043230,extracellular organelle|GO:0031982,vesicle|GO:0044421,extracellular region part|GO:0043227,membrane-bounded organelle|GO:0016020,membrane|GO:0044464,cell part|GO:0005623,cell|GO:0031988,membrane-bounded vesicle|GO:0071944,cell periphery|GO:0005615,extracellular space|GO:0072562,blood microparticle|GO:0005886,plasma membrane|GO:0005576,extracellular region|GO:1903561,extracellular vesic…	GO:0004252,serine-type endopeptidase activity|GO:0004175,endopeptidase activity|GO:0017171,serine hydrolase activity|GO:0016787,hydrolase activity|GO:0003824,catalytic activity|GO:0070011,peptidase activity, acting on L-amino acid peptides|GO:0005488,binding|GO:0005515,protein binding|GO:0001848,complement binding|GO:0008233,peptidase activity|GO:0008236,serine-type peptidase activity|GO:0140096,…	hsa04610,Complement and coagulation cascades|hsa05150,Staphylococcus aureus infection			http://www.uniprot.org/uniprot/P00751	False
Q09666	0.314253	-1.67	Q09666	AHNAK	GO:0051252,regulation of RNA metabolic process|GO:0080090,regulation of primary metabolic process|GO:0019222,regulation of metabolic process|GO:0070271,protein complex biogenesis|GO:0043933,macromolecular complex subunit organization|GO:0051049,regulation of transport|GO:0070588,calcium ion transmembrane transport|GO:0031323,regulation of cellular metabolic process|GO:1903169,regulation of calciu…	GO:0000323,lytic vacuole|GO:0015629,actin cytoskeleton|GO:0044421,extracellular region part|GO:0030016,myofibril|GO:0043229,intracellular organelle|GO:0043228,non-membrane-bounded organelle|GO:0005924,cell-substrate adherens junction|GO:0031988,membrane-bounded vesicle|GO:0043227,membrane-bounded organelle|GO:0043226,organelle|GO:0030054,cell junction|GO:0030055,cell-substrate junction|GO:0005856…	GO:0005515,protein binding|GO:0044548,S100 protein binding|GO:0097159,organic cyclic compound binding|GO:0044822,poly(A) RNA binding|GO:0005198,structural molecule activity|GO:0003723,RNA binding|GO:0003676,nucleic acid binding|GO:1901363,heterocyclic compound binding|GO:0097493,structural molecule activity conferring elasticity|GO:0005488,binding|GO:0045296,cadherin binding|GO:0050839,cell adhes…				http://www.uniprot.org/uniprot/Q09666	False
Q9Y490	0.310572	-1.687	Q9Y490	TLN1	GO:0008104,protein localization|GO:0007599,hemostasis|GO:0007409,axonogenesis|GO:0007596,blood coagulation|GO:0048468,cell development|GO:0003012,muscle system process|GO:0007165,signal transduction|GO:0030182,neuron differentiation|GO:0051651,maintenance of location in cell|GO:0071840,cellular component organization or biogenesis|GO:0051716,cellular response to stimulus|GO:0006986,response to un…	GO:0098590,plasma membrane region|GO:0043229,intracellular organelle|GO:0043228,non-membrane-bounded organelle|GO:0005924,cell-substrate adherens junction|GO:0005925,focal adhesion|GO:0043227,membrane-bounded organelle|GO:0043226,organelle|GO:0030054,cell junction|GO:0030055,cell-substrate junction|GO:0005856,cytoskeleton|GO:0098589,membrane region|GO:0042995,cell projection|GO:0031982,vesicle|GO…	GO:0005178,integrin binding|GO:0005200,structural constituent of cytoskeleton|GO:0005515,protein binding|GO:0008092,cytoskeletal protein binding|GO:0005158,insulin receptor binding|GO:0051015,actin filament binding|GO:0005198,structural molecule activity|GO:0003779,actin binding|GO:0017166,vinculin binding|GO:0044877,macromolecular complex binding|GO:0019904,protein domain specific binding|GO:003…	hsa04015,Rap1 signaling pathway|hsa04611,Platelet activation|hsa05166,Human T-cell leukemia virus 1 infection|hsa04510,Focal adhesion			http://www.uniprot.org/uniprot/Q9Y490	False
P21333	0.294431	-1.764	P21333	FLNA	GO:0033157,regulation of intracellular protein transport|GO:0051169,nuclear transport|GO:0043933,macromolecular complex subunit organization|GO:0032388,positive regulation of intracellular transport|GO:0080090,regulation of primary metabolic process|GO:0019222,regulation of metabolic process|GO:0034446,substrate adhesion-dependent cell spreading|GO:0051049,regulation of transport|GO:0032386,regul…	GO:0032432,actin filament bundle|GO:0042995,cell projection|GO:0044463,cell projection part|GO:0015629,actin cytoskeleton|GO:0044421,extracellular region part|GO:0031974,membrane-enclosed lumen|GO:0043229,intracellular organelle|GO:0043228,non-membrane-bounded organelle|GO:0005924,cell-substrate adherens junction|GO:0005925,focal adhesion|GO:0043227,membrane-bounded organelle|GO:0043226,organelle…	GO:0017160,Ral GTPase binding|GO:0005080,protein kinase C binding|GO:0031852,mu-type opioid receptor binding|GO:0017048,Rho GTPase binding|GO:0031267,small GTPase binding|GO:0051020,GTPase binding|GO:0044877,macromolecular complex binding|GO:0005488,binding|GO:0003676,nucleic acid binding|GO:0034987,immunoglobulin receptor binding|GO:0034988,Fc-gamma receptor I complex binding|GO:0001664,G-protei…	hsa05205,Proteoglycans in cancer|hsa05132,Salmonella infection|hsa04510,Focal adhesion|hsa04010,MAPK signaling pathway			http://www.uniprot.org/uniprot/P21333	False
P11171	0.284007	-1.816	P11171	EPB41	GO:0030036,actin cytoskeleton organization|GO:0003013,circulatory system process|GO:0071840,cellular component organization or biogenesis|GO:0032092,positive regulation of protein binding|GO:0016043,cellular component organization|GO:0065007,biological regulation|GO:0044699,single-organism process|GO:0044093,positive regulation of molecular function|GO:0065009,regulation of molecular function|GO:…	GO:0015629,actin cytoskeleton|GO:0019898,extrinsic component of membrane|GO:0043229,intracellular organelle|GO:0043228,non-membrane-bounded organelle|GO:0005622,intracellular|GO:0043227,membrane-bounded organelle|GO:0043226,organelle|GO:0005856,cytoskeleton|GO:0005634,nucleus|GO:0016020,membrane|GO:0005737,cytoplasm|GO:0044430,cytoskeletal part|GO:0005794,Golgi apparatus|GO:0014731,spectrin-assoc…	GO:0043168,anion binding|GO:0005200,structural constituent of cytoskeleton|GO:0005515,protein binding|GO:0008092,cytoskeletal protein binding|GO:0035091,phosphatidylinositol binding|GO:0005543,phospholipid binding|GO:0005545,1-phosphatidylinositol binding|GO:0005198,structural molecule activity|GO:0003779,actin binding|GO:0005516,calmodulin binding|GO:0008289,lipid binding|GO:0005488,binding|GO:0…	hsa04530,Tight junction			http://www.uniprot.org/uniprot/P11171	False
V9HWP0	0.283025	-1.821	V9HWP0	HEL-S-92N		GO:0005576,extracellular region	GO:0043169,cation binding|GO:0046872,metal ion binding|GO:0005488,binding|GO:0043167,ion binding				http://www.uniprot.org/uniprot/V9HWP0	False
P39656	0.275095	-1.862	P39656	DDOST	GO:0008104,protein localization|GO:0061024,membrane organization|GO:0071840,cellular component organization or biogenesis|GO:0044710,single-organism metabolic process|GO:0070727,cellular macromolecule localization|GO:0018196,peptidyl-asparagine modification|GO:0043043,peptide biosynthetic process|GO:0018193,peptidyl-amino acid modification|GO:0033036,macromolecule localization|GO:0006605,protein …	GO:0005783,endoplasmic reticulum|GO:0005789,endoplasmic reticulum membrane|GO:0042175,nuclear outer membrane-endoplasmic reticulum membrane network|GO:0043229,intracellular organelle|GO:0043227,membrane-bounded organelle|GO:0043226,organelle|GO:0031224,intrinsic component of membrane|GO:0005737,cytoplasm|GO:0031090,organelle membrane|GO:0016021,integral component of membrane|GO:0016020,membrane|G…	GO:0005515,protein binding|GO:0003824,catalytic activity|GO:0016740,transferase activity|GO:0004576,oligosaccharyl transferase activity|GO:0005488,binding|GO:0016757,transferase activity, transferring glycosyl groups|GO:0016758,transferase activity, transferring hexosyl groups|GO:0004579,dolichyl-diphosphooligosaccharide-protein glycotransferase activity	hsa04141,Protein processing in endoplasmic reticulum|hsa00513,Various types of N-glycan biosynthesis|hsa00510,N-Glycan biosynthesis|hsa01100,Metabolic pathways			http://www.uniprot.org/uniprot/P39656	False
Q6FHL3	0.267387	-1.903	Q6FHL3	TRAM1	GO:0045184,establishment of protein localization|GO:0042886,amide transport|GO:0008104,protein localization|GO:0033036,macromolecule localization|GO:0006810,transport|GO:0071705,nitrogen compound transport|GO:0015833,peptide transport|GO:0071702,organic substance transport|GO:0015031,protein transport|GO:0051234,establishment of localization|GO:0051179,localization	GO:0044425,membrane part|GO:0016021,integral component of membrane|GO:0016020,membrane|GO:0031224,intrinsic component of membrane					http://www.uniprot.org/uniprot/Q6FHL3	False
P00747	0.26554	-1.913	P00747	PLG	GO:0007599,hemostasis|GO:0048585,negative regulation of response to stimulus|GO:0048584,positive regulation of response to stimulus|GO:0048583,regulation of response to stimulus|GO:0048771,tissue remodeling|GO:0007162,negative regulation of cell adhesion|GO:0071840,cellular component organization or biogenesis|GO:0009611,response to wounding|GO:0048518,positive regulation of biological process|GO…	GO:0019897,extrinsic component of plasma membrane|GO:0009897,external side of plasma membrane|GO:0098552,side of membrane|GO:0031974,membrane-enclosed lumen|GO:0019898,extrinsic component of membrane|GO:0043229,intracellular organelle|GO:0071944,cell periphery|GO:0060205,cytoplasmic membrane-bounded vesicle lumen|GO:0043227,membrane-bounded organelle|GO:0043226,organelle|GO:0005737,cytoplasm|GO:0…	GO:0005488,binding|GO:0004252,serine-type endopeptidase activity|GO:0004175,endopeptidase activity|GO:0017171,serine hydrolase activity|GO:0016787,hydrolase activity|GO:0034185,apolipoprotein binding|GO:0003824,catalytic activity|GO:0070011,peptidase activity, acting on L-amino acid peptides|GO:0019904,protein domain specific binding|GO:0005515,protein binding|GO:0008233,peptidase activity|GO:000…	hsa05164,Influenza A|hsa04080,Neuroactive ligand-receptor interaction|hsa04610,Complement and coagulation cascades|hsa05150,Staphylococcus aureus infection		D00160,Epsilon-Aminocaproic acid (JAN); Aminocaproic acid (USP/INN); Amicar (TN)|D01136,Tranexamic acid (JP16/USAN/INN); Cyklokapron (TN); Rikavarin (TN); Transamin (TN)	http://www.uniprot.org/uniprot/P00747	False
P16157	0.257742	-1.956	P16157	ANK1	GO:0008104,protein localization|GO:0048468,cell development|GO:0061024,membrane organization|GO:0007009,plasma membrane organization|GO:0007163,establishment or maintenance of cell polarity|GO:0007165,signal transduction|GO:0090002,establishment of protein localization to plasma membrane|GO:0071840,cellular component organization or biogenesis|GO:0051716,cellular response to stimulus|GO:0097485,n…	GO:0098590,plasma membrane region|GO:0016020,membrane|GO:0005783,endoplasmic reticulum|GO:0030424,axon|GO:0030016,myofibril|GO:0030017,sarcomere|GO:0043229,intracellular organelle|GO:0043228,non-membrane-bounded organelle|GO:0045202,synapse|GO:0044424,intracellular part|GO:0005622,intracellular|GO:0043227,membrane-bounded organelle|GO:0043226,organelle|GO:0030018,Z disc|GO:0097060,synaptic membra…	GO:0030674,protein binding, bridging|GO:0005200,structural constituent of cytoskeleton|GO:0008093,cytoskeletal adaptor activity|GO:0008092,cytoskeletal protein binding|GO:0051117,ATPase binding|GO:0019899,enzyme binding|GO:0005198,structural molecule activity|GO:0005488,binding|GO:0005515,protein binding|GO:0030507,spectrin binding|GO:0060090,binding, bridging|GO:0019903,protein phosphatase bindi…	hsa05205,Proteoglycans in cancer			http://www.uniprot.org/uniprot/P16157	False
P98095	0.257742	-1.956	P98095	FBLN2	GO:0031589,cell-substrate adhesion|GO:0045785,positive regulation of cell adhesion|GO:0010810,regulation of cell-substrate adhesion|GO:0010811,positive regulation of cell-substrate adhesion|GO:0030155,regulation of cell adhesion|GO:0009987,cellular process|GO:0016043,cellular component organization|GO:0050794,regulation of cellular process|GO:0007155,cell adhesion|GO:0030198,extracellular matrix …	GO:0043230,extracellular organelle|GO:0070062,extracellular exosome|GO:0044421,extracellular region part|GO:0043227,membrane-bounded organelle|GO:0031012,extracellular matrix|GO:0043226,organelle|GO:0005576,extracellular region|GO:0031988,membrane-bounded vesicle|GO:1903561,extracellular vesicle|GO:0065010,extracellular membrane-bounded organelle|GO:0005578,proteinaceous extracellular matrix|GO:0…	GO:0043169,cation binding|GO:0005201,extracellular matrix structural constituent|GO:0050840,extracellular matrix binding|GO:0005198,structural molecule activity|GO:0043167,ion binding|GO:0005509,calcium ion binding|GO:0046872,metal ion binding|GO:0005488,binding|GO:0030023,extracellular matrix constituent conferring elasticity|GO:0097493,structural molecule activity conferring elasticity				http://www.uniprot.org/uniprot/P98095	False
P01009	0.257207	-1.959	P01009	SERPINA1	GO:0006954,inflammatory response|GO:0009892,negative regulation of metabolic process|GO:0080090,regulation of primary metabolic process|GO:0019222,regulation of metabolic process|GO:0006950,response to stress|GO:0031324,negative regulation of cellular metabolic process|GO:0031323,regulation of cellular metabolic process|GO:0032940,secretion by cell|GO:0032501,multicellular organismal process|GO:0…	GO:0005783,endoplasmic reticulum|GO:0044421,extracellular region part|GO:0031974,membrane-enclosed lumen|GO:0031012,extracellular matrix|GO:0043229,intracellular organelle|GO:0060205,cytoplasmic membrane-bounded vesicle lumen|GO:0043227,membrane-bounded organelle|GO:0043226,organelle|GO:0005737,cytoplasm|GO:0031983,vesicle lumen|GO:0070062,extracellular exosome|GO:0031093,platelet alpha granule l…	GO:0001948,glycoprotein binding|GO:0004866,endopeptidase inhibitor activity|GO:0097367,carbohydrate derivative binding|GO:0061135,endopeptidase regulator activity|GO:0061134,peptidase regulator activity|GO:0019899,enzyme binding|GO:0002020,protease binding|GO:0005515,protein binding|GO:0030414,peptidase inhibitor activity|GO:0004867,serine-type endopeptidase inhibitor activity|GO:0004857,enzyme i…	hsa04610,Complement and coagulation cascades			http://www.uniprot.org/uniprot/P01009	False
Q05682	0.251042	-1.994	Q05682	CALD1	GO:0032501,multicellular organismal process|GO:0006936,muscle contraction|GO:0044707,single-multicellular organism process|GO:0009987,cellular process|GO:0006928,movement of cell or subcellular component|GO:0003012,muscle system process|GO:0044763,single-organism cellular process|GO:0044699,single-organism process|GO:0003008,system process	GO:0015629,actin cytoskeleton|GO:0030016,myofibril|GO:0043229,intracellular organelle|GO:0043228,non-membrane-bounded organelle|GO:0005622,intracellular|GO:0043226,organelle|GO:0005856,cytoskeleton|GO:0016020,membrane|GO:0044430,cytoskeletal part|GO:0005737,cytoplasm|GO:0030478,actin cap|GO:0044424,intracellular part|GO:0005938,cell cortex|GO:0005886,plasma membrane|GO:0043232,intracellular non-m…	GO:0008092,cytoskeletal protein binding|GO:0017022,myosin binding|GO:0003779,actin binding|GO:0005516,calmodulin binding|GO:0005515,protein binding|GO:0005523,tropomyosin binding|GO:0005488,binding|GO:0045296,cadherin binding|GO:0050839,cell adhesion molecule binding	hsa04270,Vascular smooth muscle contraction			http://www.uniprot.org/uniprot/Q05682	False
P00568	0.240482	-2.056	P00568	AK1	GO:0009167,purine ribonucleoside monophosphate metabolic process|GO:0009165,nucleotide biosynthetic process|GO:0009163,nucleoside biosynthetic process|GO:0009161,ribonucleoside monophosphate metabolic process|GO:1901362,organic cyclic compound biosynthetic process|GO:0046129,purine ribonucleoside biosynthetic process|GO:0009168,purine ribonucleoside monophosphate biosynthetic process|GO:0044710,s…	GO:0071944,cell periphery|GO:0005929,cilium|GO:0043227,membrane-bounded organelle|GO:0043226,organelle|GO:0001520,outer dense fiber|GO:0005737,cytoplasm|GO:1903561,extracellular vesicle|GO:0031982,vesicle|GO:0031514,motile cilium|GO:0036126,sperm flagellum|GO:0016020,membrane|GO:0097223,sperm part|GO:0031988,membrane-bounded vesicle|GO:0032838,cell projection cytoplasm|GO:0005886,plasma membrane|…	GO:0019201,nucleotide kinase activity|GO:0019205,nucleobase-containing compound kinase activity|GO:0035639,purine ribonucleoside triphosphate binding|GO:0004017,adenylate kinase activity|GO:0005488,binding|GO:0043167,ion binding|GO:1901363,heterocyclic compound binding|GO:0001883,purine nucleoside binding|GO:0001882,nucleoside binding|GO:0043168,anion binding|GO:0000166,nucleotide binding|GO:0016…	hsa00730,Thiamine metabolism|hsa01100,Metabolic pathways|hsa00230,Purine metabolism			http://www.uniprot.org/uniprot/P00568	False
P07951	0.236187	-2.082	P07951	TPM2	GO:0019222,regulation of metabolic process|GO:0006928,movement of cell or subcellular component|GO:0003012,muscle system process|GO:0032501,multicellular organismal process|GO:0050789,regulation of biological process|GO:0044699,single-organism process|GO:0043462,regulation of ATPase activity|GO:0006936,muscle contraction|GO:0033275,actin-myosin filament sliding|GO:0065007,biological regulation|GO…	GO:0015629,actin cytoskeleton|GO:0030016,myofibril|GO:0030017,sarcomere|GO:0043229,intracellular organelle|GO:0043228,non-membrane-bounded organelle|GO:0043226,organelle|GO:0005856,cytoskeleton|GO:0044430,cytoskeletal part|GO:0005737,cytoplasm|GO:0044424,intracellular part|GO:0005865,striated muscle thin filament|GO:0005862,muscle thin filament tropomyosin|GO:0036379,myofilament|GO:0043232,intrac…	GO:0008092,cytoskeletal protein binding|GO:0005198,structural molecule activity|GO:0003779,actin binding|GO:0008307,structural constituent of muscle|GO:0005488,binding|GO:0005515,protein binding|GO:0051015,actin filament binding|GO:0044877,macromolecular complex binding|GO:0032403,protein complex binding|GO:0046983,protein dimerization activity|GO:0046982,protein heterodimerization activity|GO:00…	hsa05410,Hypertrophic cardiomyopathy|hsa05414,Dilated cardiomyopathy|hsa04260,Cardiac muscle contraction|hsa04261,Adrenergic signaling in cardiomyocytes			http://www.uniprot.org/uniprot/P07951	False
P02511	0.234718	-2.091	P02511	CRYAB	GO:0051234,establishment of localization|GO:0080090,regulation of primary metabolic process|GO:0019222,regulation of metabolic process|GO:0051049,regulation of transport|GO:0032386,regulation of intracellular transport|GO:0032387,negative regulation of intracellular transport|GO:0048468,cell development|GO:0003012,muscle system process|GO:0007165,signal transduction|GO:0023014,signal transduction…	GO:0032432,actin filament bundle|GO:0015629,actin cytoskeleton|GO:0030016,myofibril|GO:0030017,sarcomere|GO:0043229,intracellular organelle|GO:0043228,non-membrane-bounded organelle|GO:0005622,intracellular|GO:0043227,membrane-bounded organelle|GO:0043226,organelle|GO:0030018,Z disc|GO:0005856,cytoskeleton|GO:0031982,vesicle|GO:0043209,myelin sheath|GO:0005634,nucleus|GO:0016020,membrane|GO:00316…	GO:0005488,binding|GO:0043169,cation binding|GO:0015631,tubulin binding|GO:0008092,cytoskeletal protein binding|GO:0008017,microtubule binding|GO:0005212,structural constituent of eye lens|GO:0005198,structural molecule activity|GO:0043167,ion binding|GO:0044877,macromolecular complex binding|GO:0051082,unfolded protein binding|GO:0005515,protein binding|GO:0032403,protein complex binding|GO:0046…	hsa04141,Protein processing in endoplasmic reticulum|hsa04213,Longevity regulating pathway - multiple species			http://www.uniprot.org/uniprot/P02511	False
Q59E85	0.229888	-2.121	Q59E85	Q59E85	GO:0044699,single-organism process|GO:0022607,cellular component assembly|GO:0070836,caveola assembly|GO:0009987,cellular process|GO:0010256,endomembrane system organization|GO:0016043,cellular component organization|GO:0031579,membrane raft organization|GO:0061024,membrane organization|GO:0007009,plasma membrane organization|GO:0044085,cellular component biogenesis|GO:0044091,membrane biogenesis…	GO:0098590,plasma membrane region|GO:0005901,caveola|GO:0043229,intracellular organelle|GO:0071944,cell periphery|GO:0044853,plasma membrane raft|GO:0005622,intracellular|GO:0043227,membrane-bounded organelle|GO:0043226,organelle|GO:0031224,intrinsic component of membrane|GO:0005737,cytoplasm|GO:0031984,organelle subcompartment|GO:0031090,organelle membrane|GO:0016021,integral component of membra…					http://www.uniprot.org/uniprot/Q59E85	False
P04275	0.227667	-2.135	P04275	VWF	GO:0022607,cellular component assembly|GO:0007599,hemostasis|GO:0070271,protein complex biogenesis|GO:0043933,macromolecular complex subunit organization|GO:0007597,blood coagulation, intrinsic pathway|GO:0007596,blood coagulation|GO:0032940,secretion by cell|GO:0071840,cellular component organization or biogenesis|GO:0044699,single-organism process|GO:0044710,single-organism metabolic process|GO…	GO:0005783,endoplasmic reticulum|GO:0044421,extracellular region part|GO:0031974,membrane-enclosed lumen|GO:0031012,extracellular matrix|GO:0043229,intracellular organelle|GO:0060205,cytoplasmic membrane-bounded vesicle lumen|GO:0030135,coated vesicle|GO:0043226,organelle|GO:0030136,clathrin-coated vesicle|GO:0005737,cytoplasm|GO:0031983,vesicle lumen|GO:0031982,vesicle|GO:0031093,platelet alpha …	GO:0001948,glycoprotein binding|GO:0005178,integrin binding|GO:0050839,cell adhesion molecule binding|GO:0005515,protein binding|GO:0047485,protein N-terminus binding|GO:0097367,carbohydrate derivative binding|GO:0051087,chaperone binding|GO:0019899,enzyme binding|GO:0019865,immunoglobulin binding|GO:0044877,macromolecular complex binding|GO:0005488,binding|GO:0002020,protease binding|GO:0032403,…	hsa04611,Platelet activation|hsa04610,Complement and coagulation cascades|hsa04512,ECM-receptor interaction|hsa04510,Focal adhesion|hsa05165,Human papillomavirus infection|hsa04151,PI3K-Akt signaling pathway			http://www.uniprot.org/uniprot/P04275	False
Q7L576	0.223911	-2.159	Q7L576	CYFIP1	GO:0048675,axon extension|GO:0006909,phagocytosis|GO:0048589,developmental growth|GO:0048588,developmental cell growth|GO:0048584,positive regulation of response to stimulus|GO:0048583,regulation of response to stimulus|GO:0008064,regulation of actin polymerization or depolymerization|GO:0007165,signal transduction|GO:0007166,cell surface receptor signaling pathway|GO:0007167,enzyme linked recept…	GO:0045202,synapse|GO:0005924,cell-substrate adherens junction|GO:0005925,focal adhesion|GO:0043227,membrane-bounded organelle|GO:0043226,organelle|GO:0030054,cell junction|GO:0030055,cell-substrate junction|GO:0005737,cytoplasm|GO:0001726,ruffle|GO:0042995,cell projection|GO:0070062,extracellular exosome|GO:0031988,membrane-bounded vesicle|GO:0097458,neuron part|GO:0034518,RNA cap binding comple…	GO:0019899,enzyme binding|GO:0008092,cytoskeletal protein binding|GO:0051020,GTPase binding|GO:0051015,actin filament binding|GO:0017016,Ras GTPase binding|GO:0003779,actin binding|GO:0031267,small GTPase binding|GO:0048365,Rac GTPase binding|GO:0044877,macromolecular complex binding|GO:0017048,Rho GTPase binding|GO:0005515,protein binding|GO:0032403,protein complex binding|GO:0005488,binding|GO:…	hsa05130,Pathogenic Escherichia coli infection|hsa03013,RNA transport|hsa04810,Regulation of actin cytoskeleton			http://www.uniprot.org/uniprot/Q7L576	False
P10643	0.223137	-2.164	P10643	C7	GO:0006954,inflammatory response|GO:0030449,regulation of complement activation|GO:0080090,regulation of primary metabolic process|GO:0019222,regulation of metabolic process|GO:0032101,regulation of response to external stimulus|GO:0048584,positive regulation of response to stimulus|GO:0048583,regulation of response to stimulus|GO:0009611,response to wounding|GO:0016485,protein processing|GO:0002…	GO:0071944,cell periphery|GO:0031226,intrinsic component of plasma membrane|GO:0043226,organelle|GO:0031224,intrinsic component of membrane|GO:0046930,pore complex|GO:0031982,vesicle|GO:0043227,membrane-bounded organelle|GO:0016021,integral component of membrane|GO:0016020,membrane|GO:0031988,membrane-bounded vesicle|GO:0044459,plasma membrane part|GO:0005887,integral component of plasma membrane…		hsa05322,Systemic lupus erythematosus|hsa04610,Complement and coagulation cascades|hsa05020,Prion diseases			http://www.uniprot.org/uniprot/P10643	False
Q99584	0.221442	-2.175	Q99584	S100A13	GO:0008104,protein localization|GO:0048584,positive regulation of response to stimulus|GO:0048583,regulation of response to stimulus|GO:0007165,signal transduction|GO:0050703,interleukin-1 alpha secretion|GO:0071840,cellular component organization or biogenesis|GO:0051716,cellular response to stimulus|GO:0009966,regulation of signal transduction|GO:0009967,positive regulation of signal transducti…	GO:0000323,lytic vacuole|GO:0043229,intracellular organelle|GO:0043227,membrane-bounded organelle|GO:0043226,organelle|GO:0005737,cytoplasm|GO:0031982,vesicle|GO:0005773,vacuole|GO:0005615,extracellular space|GO:0005634,nucleus|GO:0042629,mast cell granule|GO:0031988,membrane-bounded vesicle|GO:0048471,perinuclear region of cytoplasm|GO:1903561,extracellular vesicle|GO:0070062,extracellular exoso…	GO:0005488,binding|GO:0043169,cation binding|GO:0005507,copper ion binding|GO:0046914,transition metal ion binding|GO:0008289,lipid binding|GO:0017134,fibroblast growth factor binding|GO:0043167,ion binding|GO:0019838,growth factor binding|GO:0050786,RAGE receptor binding|GO:0008270,zinc ion binding|GO:0005515,protein binding|GO:0042803,protein homodimerization activity|GO:0046983,protein dimeriz…				http://www.uniprot.org/uniprot/Q99584	False
P19823	0.217487	-2.201	P19823	ITIH2	GO:0009892,negative regulation of metabolic process|GO:0080090,regulation of primary metabolic process|GO:0019222,regulation of metabolic process|GO:0031324,negative regulation of cellular metabolic process|GO:0031323,regulation of cellular metabolic process|GO:1903510,mucopolysaccharide metabolic process|GO:0006807,nitrogen compound metabolic process|GO:0030203,glycosaminoglycan metabolic proces…	GO:0043230,extracellular organelle|GO:0031982,vesicle|GO:0044421,extracellular region part|GO:0043227,membrane-bounded organelle|GO:0072562,blood microparticle|GO:0031988,membrane-bounded vesicle|GO:0005576,extracellular region|GO:0005615,extracellular space|GO:1903561,extracellular vesicle|GO:0065010,extracellular membrane-bounded organelle|GO:0043226,organelle|GO:0070062,extracellular exosome|G…	GO:0004866,endopeptidase inhibitor activity|GO:0061135,endopeptidase regulator activity|GO:0061134,peptidase regulator activity|GO:0030414,peptidase inhibitor activity|GO:0004867,serine-type endopeptidase inhibitor activity|GO:0004857,enzyme inhibitor activity|GO:0098772,molecular function regulator|GO:0030234,enzyme regulator activity				http://www.uniprot.org/uniprot/P19823	False
B3KTX4	0.217186	-2.203	B3KTX4	B3KTX4	GO:0009987,cellular process|GO:0007017,microtubule-based process	GO:0005856,cytoskeleton|GO:0043234,protein complex|GO:0015630,microtubule cytoskeleton|GO:0043228,non-membrane-bounded organelle|GO:0015629,actin cytoskeleton|GO:0043232,intracellular non-membrane-bounded organelle|GO:0044464,cell part|GO:0005623,cell|GO:0043226,organelle|GO:0044446,intracellular organelle part|GO:0043229,intracellular organelle|GO:0044430,cytoskeletal part|GO:0005869,dynactin co…					http://www.uniprot.org/uniprot/B3KTX4	False
Q9Y3Z3	0.213602	-2.227	Q9Y3Z3	SAMHD1	GO:0019221,cytokine-mediated signaling pathway|GO:0009217,purine deoxyribonucleoside triphosphate catabolic process|GO:0048583,regulation of response to stimulus|GO:0009166,nucleotide catabolic process|GO:0007165,signal transduction|GO:0007166,cell surface receptor signaling pathway|GO:0031347,regulation of defense response|GO:0046434,organophosphate catabolic process|GO:0044712,single-organism c…	GO:0044446,intracellular organelle part|GO:0043231,intracellular membrane-bounded organelle|GO:0031981,nuclear lumen|GO:0043233,organelle lumen|GO:0005634,nucleus|GO:0016020,membrane|GO:0044464,cell part|GO:0031974,membrane-enclosed lumen|GO:0005622,intracellular|GO:0005654,nucleoplasm|GO:0070013,intracellular organelle lumen|GO:0043229,intracellular organelle|GO:0071944,cell periphery|GO:0044428…	GO:0005488,binding|GO:0016793,triphosphoric monoester hydrolase activity|GO:0042578,phosphoric ester hydrolase activity|GO:0008270,zinc ion binding|GO:0003676,nucleic acid binding|GO:0043167,ion binding|GO:1901363,heterocyclic compound binding|GO:1901265,nucleoside phosphate binding|GO:0043168,anion binding|GO:0043169,cation binding|GO:0046914,transition metal ion binding|GO:0000166,nucleotide bi…	hsa05170,Human immunodeficiency virus 1 infection			http://www.uniprot.org/uniprot/Q9Y3Z3	False
O00159	0.200684	-2.317	O00159	MYO1C	GO:0033157,regulation of intracellular protein transport|GO:0008104,protein localization|GO:0032388,positive regulation of intracellular transport|GO:0051049,regulation of transport|GO:0032386,regulation of intracellular transport|GO:0048584,positive regulation of response to stimulus|GO:0048583,regulation of response to stimulus|GO:0061024,membrane organization|GO:0007165,signal transduction|GO:…	GO:0032432,actin filament bundle|GO:0098590,plasma membrane region|GO:0044463,cell projection part|GO:0098796,membrane protein complex|GO:0015629,actin cytoskeleton|GO:0044421,extracellular region part|GO:0060171,stereocilium membrane|GO:0043232,intracellular non-membrane-bounded organelle|GO:0031974,membrane-enclosed lumen|GO:0031975,envelope|GO:0043229,intracellular organelle|GO:0043228,non-mem…	GO:0008022,protein C-terminus binding|GO:0017160,Ral GTPase binding|GO:0035639,purine ribonucleoside triphosphate binding|GO:0019899,enzyme binding|GO:0031267,small GTPase binding|GO:0051020,GTPase binding|GO:0005488,binding|GO:0016887,ATPase activity|GO:0043167,ion binding|GO:1901363,heterocyclic compound binding|GO:0001883,purine nucleoside binding|GO:0001882,nucleoside binding|GO:0043168,anion…	hsa05130,Pathogenic Escherichia coli infection			http://www.uniprot.org/uniprot/O00159	False
O43760	0.197647	-2.339	O43760	SYNGR2	GO:0046903,secretion|GO:0009987,cellular process|GO:0016192,vesicle-mediated transport|GO:0044699,single-organism process|GO:0006887,exocytosis|GO:0010256,endomembrane system organization|GO:0044765,single-organism transport|GO:0016043,cellular component organization|GO:0045055,regulated exocytosis|GO:0061024,membrane organization|GO:0032940,secretion by cell|GO:0044802,single-organism membrane o…	GO:0008021,synaptic vesicle|GO:0031594,neuromuscular junction|GO:0043229,intracellular organelle|GO:0045202,synapse|GO:0043227,membrane-bounded organelle|GO:0043226,organelle|GO:0031224,intrinsic component of membrane|GO:0005737,cytoplasm|GO:0070062,extracellular exosome|GO:0016023,cytoplasmic, membrane-bounded vesicle|GO:0031410,cytoplasmic vesicle|GO:0016021,integral component of membrane|GO:00…	GO:0005488,binding|GO:0005515,protein binding				http://www.uniprot.org/uniprot/O43760	False
P20073	0.194117	-2.365	P20073	ANXA7	GO:0022604,regulation of cell morphogenesis|GO:0009992,cellular water homeostasis|GO:0009628,response to abiotic stimulus|GO:0009892,negative regulation of metabolic process|GO:0008152,metabolic process|GO:0019222,regulation of metabolic process|GO:0022603,regulation of anatomical structure morphogenesis|GO:0050801,ion homeostasis|GO:0030154,cell differentiation|GO:0007610,behavior|GO:0051128,reg…	GO:0016020,membrane|GO:0005783,endoplasmic reticulum|GO:0044421,extracellular region part|GO:0005789,endoplasmic reticulum membrane|GO:0042175,nuclear outer membrane-endoplasmic reticulum membrane network|GO:0043229,intracellular organelle|GO:0071944,cell periphery|GO:0043227,membrane-bounded organelle|GO:0043226,organelle|GO:0005737,cytoplasm|GO:0030667,secretory granule membrane|GO:0070062,extr…	GO:0048306,calcium-dependent protein binding|GO:0005488,binding|GO:0003676,nucleic acid binding|GO:1901363,heterocyclic compound binding|GO:0043168,anion binding|GO:0043169,cation binding|GO:0005543,phospholipid binding|GO:0005544,calcium-dependent phospholipid binding|GO:0043167,ion binding|GO:0005509,calcium ion binding|GO:0032403,protein complex binding|GO:0046872,metal ion binding|GO:0005178,…				http://www.uniprot.org/uniprot/P20073	False
P00915	0.193178	-2.372	P00915	CA1	GO:0044710,single-organism metabolic process|GO:0006810,transport|GO:0044699,single-organism process|GO:0006730,one-carbon metabolic process|GO:0009987,cellular process|GO:0015701,bicarbonate transport|GO:0044237,cellular metabolic process|GO:0015711,organic anion transport|GO:0044765,single-organism transport|GO:0006820,anion transport|GO:0044763,single-organism cellular process|GO:0044281,small…	GO:0005737,cytoplasm|GO:0005622,intracellular|GO:0043230,extracellular organelle|GO:0031982,vesicle|GO:0044421,extracellular region part|GO:0043227,membrane-bounded organelle|GO:0005829,cytosol|GO:0044464,cell part|GO:0005623,cell|GO:0031988,membrane-bounded vesicle|GO:0044444,cytoplasmic part|GO:0005576,extracellular region|GO:0044424,intracellular part|GO:1903561,extracellular vesicle|GO:006501…	GO:0005488,binding|GO:0016787,hydrolase activity|GO:0046872,metal ion binding|GO:0046914,transition metal ion binding|GO:0043169,cation binding|GO:0016835,carbon-oxygen lyase activity|GO:0016836,hydro-lyase activity|GO:0052689,carboxylic ester hydrolase activity|GO:0043167,ion binding|GO:0003824,catalytic activity|GO:0016788,hydrolase activity, acting on ester bonds|GO:0005515,protein binding|GO:…	hsa01100,Metabolic pathways|hsa00910,Nitrogen metabolism		D00218,Acetazolamide (JP16/USP/INN); Diamox (TN)|D00518,Diclofenamide (JP16/INN); Dichlorphenamide (USP); Daranide (TN)|D00652,Brinzolamide (JAN/USP/INN); Azopt (TN)|D00653,Dorzolamide hydrochloride (JP16/USP); Trusopt (TN)|D00655,Methazolamide (JAN/USP/INN); Neptazane (TN)|D01196,Acetazolamide sodium (JAN); Diamox (TN)|D01822,Clofenamide (JAN/INN)|D02441,Ethoxzolamide; Cardrase (TN)|D03845,Sezol…	http://www.uniprot.org/uniprot/P00915	False
Q96D15	0.186597	-2.422	Q96D15	RCN3	GO:0008104,protein localization|GO:0080090,regulation of primary metabolic process|GO:0019222,regulation of metabolic process|GO:0060249,anatomical structure homeostasis|GO:0048583,regulation of response to stimulus|GO:0007165,signal transduction|GO:0051896,regulation of protein kinase B signaling|GO:0051716,cellular response to stimulus|GO:0010604,positive regulation of macromolecule metabolic p…	GO:0005737,cytoplasm|GO:0012505,endomembrane system|GO:0005783,endoplasmic reticulum|GO:0044432,endoplasmic reticulum part|GO:0043233,organelle lumen|GO:0044464,cell part|GO:0044444,cytoplasmic part|GO:0031974,membrane-enclosed lumen|GO:0005622,intracellular|GO:0044446,intracellular organelle part|GO:0070013,intracellular organelle lumen|GO:0043229,intracellular organelle|GO:0005788,endoplasmic r…	GO:0043169,cation binding|GO:0043167,ion binding|GO:0005488,binding|GO:0005515,protein binding|GO:0046872,metal ion binding|GO:0005509,calcium ion binding				http://www.uniprot.org/uniprot/Q96D15	False
Q13509	0.183519	-2.446	Q13509	TUBB3	GO:0032502,developmental process|GO:0044707,single-multicellular organism process|GO:0006457,protein folding|GO:0008152,metabolic process|GO:0070271,protein complex biogenesis|GO:0030030,cell projection organization|GO:0030154,cell differentiation|GO:0048468,cell development|GO:1903047,mitotic cell cycle process|GO:0006928,movement of cell or subcellular component|GO:0006458,'de novo' protein fol…	GO:0030425,dendrite|GO:0030424,axon|GO:0043229,intracellular organelle|GO:0043228,non-membrane-bounded organelle|GO:0005874,microtubule|GO:0043226,organelle|GO:0005856,cytoskeleton|GO:0042995,cell projection|GO:0031982,vesicle|GO:0043227,membrane-bounded organelle|GO:0005634,nucleus|GO:0031988,membrane-bounded vesicle|GO:0097458,neuron part|GO:0044430,cytoskeletal part|GO:0043005,neuron projectio…	GO:0005200,structural constituent of cytoskeleton|GO:0035639,purine ribonucleoside triphosphate binding|GO:0005488,binding|GO:0005198,structural molecule activity|GO:1901363,heterocyclic compound binding|GO:1901265,nucleoside phosphate binding|GO:0001882,nucleoside binding|GO:0043168,anion binding|GO:0042277,peptide binding|GO:0016462,pyrophosphatase activity|GO:0000166,nucleotide binding|GO:0032…	hsa05130,Pathogenic Escherichia coli infection|hsa04145,Phagosome|hsa04540,Gap junction		D00491,Paclitaxel (JAN/USP/INN); Abraxane (TN); Taxol (TN)|D00570,Colchicine (JP16/USP); Colchicine (TN)|D01068,Vinblastine sulfate (JP16/USP); Exal (TN); Velban (TN)|D01769,Vindesine sulfate (JAN/USAN); Fildesin (TN)|D01935,Vinorelbine ditartrate (JAN); Vinorelbine tartrate (USP); KW 2307; Navelbine (TN)|D02165,Docetaxel hydrate (JP16); Docetaxel (USAN); Docetaxel injection (JP16); Docetaxel for…	http://www.uniprot.org/uniprot/Q13509	False
Q96MM6	0.17386	-2.524	Q96MM6	HSPA12B			GO:0035639,purine ribonucleoside triphosphate binding|GO:0005488,binding|GO:0043167,ion binding|GO:1901363,heterocyclic compound binding|GO:1901265,nucleoside phosphate binding|GO:0001882,nucleoside binding|GO:0043168,anion binding|GO:0000166,nucleotide binding|GO:0001883,purine nucleoside binding|GO:0032549,ribonucleoside binding|GO:0017076,purine nucleotide binding|GO:0005524,ATP binding|GO:003…				http://www.uniprot.org/uniprot/Q96MM6	False
P16452	0.169929	-2.557	P16452	EPB42	GO:0022604,regulation of cell morphogenesis|GO:0018149,peptide cross-linking|GO:0020027,hemoglobin metabolic process|GO:0022603,regulation of anatomical structure morphogenesis|GO:0050801,ion homeostasis|GO:0030154,cell differentiation|GO:0048468,cell development|GO:0048469,cell maturation|GO:0051128,regulation of cellular component organization|GO:0042592,homeostatic process|GO:0043170,macromole…	GO:0005856,cytoskeleton|GO:0005737,cytoplasm|GO:0043232,intracellular non-membrane-bounded organelle|GO:0030863,cortical cytoskeleton|GO:0044464,cell part|GO:0016020,membrane|GO:0071944,cell periphery|GO:0044444,cytoplasmic part|GO:0005623,cell|GO:0005622,intracellular|GO:0043229,intracellular organelle|GO:0043228,non-membrane-bounded organelle|GO:0005938,cell cortex|GO:0005886,plasma membrane|GO…	GO:0005200,structural constituent of cytoskeleton|GO:0003810,protein-glutamine gamma-glutamyltransferase activity|GO:0005488,binding|GO:0000166,nucleotide binding|GO:1901363,heterocyclic compound binding|GO:1901265,nucleoside phosphate binding|GO:0001882,nucleoside binding|GO:0043168,anion binding|GO:0005198,structural molecule activity|GO:0035639,purine ribonucleoside triphosphate binding|GO:001…				http://www.uniprot.org/uniprot/P16452	False
P15144	0.167473	-2.578	P15144	ANPEP	GO:0046718,viral entry into host cell|GO:0052192,movement in environment of other organism involved in symbiotic interaction|GO:0080090,regulation of primary metabolic process|GO:0019222,regulation of metabolic process|GO:0051246,regulation of protein metabolic process|GO:0030154,cell differentiation|GO:0044403,symbiosis, encompassing mutualism through parasitism|GO:0060177,regulation of angioten…	GO:0009897,external side of plasma membrane|GO:0000323,lytic vacuole|GO:0044421,extracellular region part|GO:0043229,intracellular organelle|GO:0071944,cell periphery|GO:0098552,side of membrane|GO:0031988,membrane-bounded vesicle|GO:0043227,membrane-bounded organelle|GO:0043226,organelle|GO:0031224,intrinsic component of membrane|GO:0005737,cytoplasm|GO:0044446,intracellular organelle part|GO:00…	GO:0005488,binding|GO:0004177,aminopeptidase activity|GO:0042277,peptide binding|GO:0046914,transition metal ion binding|GO:0008238,exopeptidase activity|GO:0033218,amide binding|GO:0016787,hydrolase activity|GO:0001618,virus receptor activity|GO:0043169,cation binding|GO:0003824,catalytic activity|GO:0043167,ion binding|GO:0060089,molecular transducer activity|GO:0070011,peptidase activity, acti…	hsa04614,Renin-angiotensin system|hsa01100,Metabolic pathways|hsa00480,Glutathione metabolism|hsa04640,Hematopoietic cell lineage	H00003,Acute myeloid leukemia (AML)	D10026,Tosedostat (USAN/INN)	http://www.uniprot.org/uniprot/P15144	False
Q9NZM1	0.165626	-2.594	Q9NZM1	MYOF	GO:0042221,response to chemical|GO:0070887,cellular response to chemical stimulus|GO:0034605,cellular response to heat|GO:0023051,regulation of signaling|GO:0048583,regulation of response to stimulus|GO:0009408,response to heat|GO:0070848,response to growth factor|GO:0006949,syncytium formation|GO:0007009,plasma membrane organization|GO:0003013,circulatory system process|GO:0023052,signaling|GO:0…	GO:0098590,plasma membrane region|GO:0016020,membrane|GO:0044421,extracellular region part|GO:0031975,envelope|GO:0005901,caveola|GO:0043229,intracellular organelle|GO:0071944,cell periphery|GO:0044853,plasma membrane raft|GO:0043227,membrane-bounded organelle|GO:0043226,organelle|GO:0031224,intrinsic component of membrane|GO:0005737,cytoplasm|GO:0070062,extracellular exosome|GO:0016023,cytoplasm…	GO:0043168,anion binding|GO:0005543,phospholipid binding|GO:0008289,lipid binding|GO:0043167,ion binding|GO:0005488,binding|GO:0005515,protein binding				http://www.uniprot.org/uniprot/Q9NZM1	False
P02549	0.160428	-2.64	P02549	SPTA1	GO:0043933,macromolecular complex subunit organization|GO:0034112,positive regulation of homotypic cell-cell adhesion|GO:0034110,regulation of homotypic cell-cell adhesion|GO:0048468,cell development|GO:0006778,porphyrin-containing compound metabolic process|GO:0006779,porphyrin-containing compound biosynthetic process|GO:0008064,regulation of actin polymerization or depolymerization|GO:0061024,m…	GO:0032437,cuticular plate|GO:0009898,cytoplasmic side of plasma membrane|GO:0043229,intracellular organelle|GO:0043228,non-membrane-bounded organelle|GO:0098552,side of membrane|GO:0005622,intracellular|GO:0031226,intrinsic component of plasma membrane|GO:0043226,organelle|GO:0031224,intrinsic component of membrane|GO:0015629,actin cytoskeleton|GO:0005856,cytoskeleton|GO:0016020,membrane|GO:0044…	GO:0043169,cation binding|GO:0005200,structural constituent of cytoskeleton|GO:0008092,cytoskeletal protein binding|GO:0046982,protein heterodimerization activity|GO:0051015,actin filament binding|GO:0005198,structural molecule activity|GO:0003779,actin binding|GO:0043167,ion binding|GO:0044877,macromolecular complex binding|GO:0005509,calcium ion binding|GO:0005515,protein binding|GO:0032403,pro…	hsa04210,Apoptosis			http://www.uniprot.org/uniprot/P02549	False
P30273	0.159541	-2.648	P30273	FCER1G	GO:0002495,antigen processing and presentation of peptide antigen via MHC class II|GO:0006887,exocytosis|GO:0032388,positive regulation of intracellular transport|GO:0051046,regulation of secretion|GO:0051047,positive regulation of secretion|GO:0051049,regulation of transport|GO:0032386,regulation of intracellular transport|GO:0048584,positive regulation of response to stimulus|GO:0048583,regulat…	GO:0043234,protein complex|GO:0009897,external side of plasma membrane|GO:0032997,Fc receptor complex|GO:0016020,membrane|GO:0032991,macromolecular complex|GO:0044459,plasma membrane part|GO:0016021,integral component of membrane|GO:0005886,plasma membrane|GO:0044464,cell part|GO:0032998,Fc-epsilon receptor I complex|GO:0005623,cell|GO:0098797,plasma membrane protein complex|GO:0098796,membrane p…	GO:0038023,signaling receptor activity|GO:0005515,protein binding|GO:0019863,IgE binding|GO:0019763,immunoglobulin receptor activity|GO:0019767,IgE receptor activity|GO:0019865,immunoglobulin binding|GO:0060089,molecular transducer activity|GO:0004888,transmembrane signaling receptor activity|GO:0019864,IgG binding|GO:0004872,receptor activity|GO:0004871,signal transducer activity|GO:0032403,prot…	hsa04611,Platelet activation|hsa04625,C-type lectin receptor signaling pathway|hsa05152,Tuberculosis|hsa05310,Asthma|hsa04071,Sphingolipid signaling pathway|hsa04072,Phospholipase D signaling pathway|hsa04664,Fc epsilon RI signaling pathway|hsa04650,Natural killer cell mediated cytotoxicity			http://www.uniprot.org/uniprot/P30273	False
P17661	0.15822	-2.66	P17661	DES	GO:0006928,movement of cell or subcellular component|GO:0003012,muscle system process|GO:0060047,heart contraction|GO:0003015,heart process|GO:0050789,regulation of biological process|GO:0044699,single-organism process|GO:0006936,muscle contraction|GO:0044057,regulation of system process|GO:0009987,cellular process|GO:0016043,cellular component organization|GO:0033275,actin-myosin filament slidin…	GO:0030016,myofibril|GO:0030017,sarcomere|GO:0043229,intracellular organelle|GO:0043228,non-membrane-bounded organelle|GO:0045202,synapse|GO:0044424,intracellular part|GO:0043227,membrane-bounded organelle|GO:0043226,organelle|GO:0030018,Z disc|GO:0005856,cytoskeleton|GO:0045111,intermediate filament cytoskeleton|GO:0070062,extracellular exosome|GO:0016020,membrane|GO:0031674,I band|GO:0031988,me…	GO:0005200,structural constituent of cytoskeleton|GO:0008092,cytoskeletal protein binding|GO:0005198,structural molecule activity|GO:0005488,binding|GO:0005515,protein binding|GO:0042802,identical protein binding	hsa05410,Hypertrophic cardiomyopathy|hsa05412,Arrhythmogenic right ventricular cardiomyopathy|hsa05414,Dilated cardiomyopathy			http://www.uniprot.org/uniprot/P17661	False
D9ZGG2	0.155825	-2.682	D9ZGG2	VTN	GO:0022607,cellular component assembly|GO:0070271,protein complex biogenesis|GO:0043933,macromolecular complex subunit organization|GO:0030155,regulation of cell adhesion|GO:0030154,cell differentiation|GO:0007160,cell-matrix adhesion|GO:0001889,liver development|GO:0010001,glial cell differentiation|GO:0034622,cellular macromolecular complex assembly|GO:0050789,regulation of biological process|G…	GO:0005783,endoplasmic reticulum|GO:0005788,endoplasmic reticulum lumen|GO:0031974,membrane-enclosed lumen|GO:0031012,extracellular matrix|GO:0043229,intracellular organelle|GO:0043227,membrane-bounded organelle|GO:0043226,organelle|GO:0005737,cytoplasm|GO:0005615,extracellular space|GO:0044421,extracellular region part|GO:0044432,endoplasmic reticulum part|GO:0044431,Golgi apparatus part|GO:0005…	GO:1901681,sulfur compound binding|GO:0043168,anion binding|GO:0038024,cargo receptor activity|GO:0050840,extracellular matrix binding|GO:0097367,carbohydrate derivative binding|GO:0005044,scavenger receptor activity|GO:0030247,polysaccharide binding|GO:0030246,carbohydrate binding|GO:0043167,ion binding|GO:0005539,glycosaminoglycan binding|GO:0060089,molecular transducer activity|GO:0001871,patt…				http://www.uniprot.org/uniprot/D9ZGG2	False
P05186	0.148754	-2.749	P05186	ALPL	GO:0048705,skeletal system morphogenesis|GO:0009991,response to extracellular stimulus|GO:0048856,anatomical structure development|GO:0034505,tooth mineralization|GO:0016311,dephosphorylation|GO:0030154,cell differentiation|GO:0060349,bone morphogenesis|GO:0060348,bone development|GO:0001501,skeletal system development|GO:0014070,response to organic cyclic compound|GO:0001503,ossification|GO:0046…	GO:0031012,extracellular matrix|GO:0071944,cell periphery|GO:0043227,membrane-bounded organelle|GO:0043226,organelle|GO:0031224,intrinsic component of membrane|GO:0031225,anchored component of membrane|GO:0070062,extracellular exosome|GO:0016021,integral component of membrane|GO:0016020,membrane|GO:0031988,membrane-bounded vesicle|GO:0031982,vesicle|GO:0005886,plasma membrane|GO:1903561,extracell…	GO:0016787,hydrolase activity|GO:0016818,hydrolase activity, acting on acid anhydrides, in phosphorus-containing anhydrides|GO:0016791,phosphatase activity|GO:0004035,alkaline phosphatase activity|GO:0003824,catalytic activity|GO:0016817,hydrolase activity, acting on acid anhydrides|GO:0016788,hydrolase activity, acting on ester bonds|GO:0043167,ion binding|GO:0042578,phosphoric ester hydrolase a…	hsa00730,Thiamine metabolism|hsa00790,Folate biosynthesis|hsa01100,Metabolic pathways			http://www.uniprot.org/uniprot/P05186	False
P01023	0.141807	-2.818	P01023	A2M	GO:0007599,hemostasis|GO:0080090,regulation of primary metabolic process|GO:0019222,regulation of metabolic process|GO:0048585,negative regulation of response to stimulus|GO:0048584,positive regulation of response to stimulus|GO:0048583,regulation of response to stimulus|GO:0031348,negative regulation of defense response|GO:0007165,signal transduction|GO:0031347,regulation of defense response|GO:…	GO:0031974,membrane-enclosed lumen|GO:0043229,intracellular organelle|GO:0060205,cytoplasmic membrane-bounded vesicle lumen|GO:0043227,membrane-bounded organelle|GO:0043226,organelle|GO:0005737,cytoplasm|GO:0031983,vesicle lumen|GO:0070062,extracellular exosome|GO:0031093,platelet alpha granule lumen|GO:0016023,cytoplasmic, membrane-bounded vesicle|GO:0031410,cytoplasmic vesicle|GO:0072562,blood …	GO:0030414,peptidase inhibitor activity|GO:0019958,C-X-C chemokine binding|GO:0048306,calcium-dependent protein binding|GO:0019956,chemokine binding|GO:0019955,cytokine binding|GO:0019899,enzyme binding|GO:0005488,binding|GO:0004857,enzyme inhibitor activity|GO:0098772,molecular function regulator|GO:0019959,interleukin-8 binding|GO:0019838,growth factor binding|GO:0002020,protease binding|GO:004…	hsa04610,Complement and coagulation cascades			http://www.uniprot.org/uniprot/P01023	False
Q7L7L0	0.137643	-2.861	Q7L7L0	HIST3H2A	GO:0034728,nucleosome organization|GO:0051716,cellular response to stimulus|GO:0071482,cellular response to light stimulus|GO:0043933,macromolecular complex subunit organization|GO:0009314,response to radiation|GO:0090304,nucleic acid metabolic process|GO:0034641,cellular nitrogen compound metabolic process|GO:0070914,UV-damage excision repair|GO:0009416,response to light stimulus|GO:0034644,cell…	GO:0031974,membrane-enclosed lumen|GO:0044815,DNA packaging complex|GO:0043229,intracellular organelle|GO:0043228,non-membrane-bounded organelle|GO:0000785,chromatin|GO:0000786,nucleosome|GO:0000788,nuclear nucleosome|GO:0000228,nuclear chromosome|GO:0043227,membrane-bounded organelle|GO:0043226,organelle|GO:0070062,extracellular exosome|GO:0031981,nuclear lumen|GO:0005634,nucleus|GO:0031988,memb…	GO:0003676,nucleic acid binding|GO:0097159,organic cyclic compound binding|GO:0005488,binding|GO:0005515,protein binding|GO:0003677,DNA binding|GO:0046983,protein dimerization activity|GO:0046982,protein heterodimerization activity|GO:1901363,heterocyclic compound binding	hsa05322,Systemic lupus erythematosus|hsa05034,Alcoholism|hsa04217,Necroptosis			http://www.uniprot.org/uniprot/Q7L7L0	False
O14558	0.137357	-2.864	O14558	HSPB6	GO:0044707,single-multicellular organism process|GO:0044057,regulation of system process|GO:0006936,muscle contraction|GO:0006937,regulation of muscle contraction|GO:0003012,muscle system process|GO:0032501,multicellular organismal process|GO:0065007,biological regulation|GO:0090257,regulation of muscle system process|GO:0051239,regulation of multicellular organismal process|GO:0050789,regulation…	GO:0005737,cytoplasm|GO:0043231,intracellular membrane-bounded organelle|GO:0005634,nucleus|GO:0044464,cell part|GO:0005623,cell|GO:0005622,intracellular|GO:0043229,intracellular organelle|GO:0044424,intracellular part|GO:0043227,membrane-bounded organelle|GO:0043226,organelle|GO:0005576,extracellular region|GO:0031974,membrane-enclosed lumen|GO:0043228,non-membrane-bounded organelle|GO:0031981,n…	GO:0005212,structural constituent of eye lens|GO:0005198,structural molecule activity|GO:0005488,binding|GO:0005515,protein binding|GO:0046983,protein dimerization activity|GO:0042802,identical protein binding|GO:0042803,protein homodimerization activity|GO:0051087,chaperone binding|GO:0051082,unfolded protein binding				http://www.uniprot.org/uniprot/O14558	False
P02675	0.135372	-2.885	P02675	FGB	GO:2001234,negative regulation of apoptotic signaling pathway|GO:0034116,positive regulation of heterotypic cell-cell adhesion|GO:2001236,regulation of extrinsic apoptotic signaling pathway|GO:2001237,negative regulation of extrinsic apoptotic signaling pathway|GO:0019220,regulation of phosphate metabolic process|GO:0080090,regulation of primary metabolic process|GO:0019222,regulation of metaboli…	GO:0009897,external side of plasma membrane|GO:0098552,side of membrane|GO:0031974,membrane-enclosed lumen|GO:0043229,intracellular organelle|GO:0071944,cell periphery|GO:0060205,cytoplasmic membrane-bounded vesicle lumen|GO:0043227,membrane-bounded organelle|GO:0043226,organelle|GO:0005737,cytoplasm|GO:0031983,vesicle lumen|GO:0070062,extracellular exosome|GO:0031093,platelet alpha granule lumen…	GO:0030674,protein binding, bridging|GO:0051087,chaperone binding|GO:0005198,structural molecule activity|GO:0005488,binding|GO:0005515,protein binding|GO:0005102,receptor binding|GO:0050839,cell adhesion molecule binding|GO:0060090,binding, bridging|GO:0005201,extracellular matrix structural constituent	hsa04611,Platelet activation|hsa04610,Complement and coagulation cascades			http://www.uniprot.org/uniprot/P02675	False
P08294	0.129677	-2.947	P08294	SOD3	GO:0010038,response to metal ion|GO:0000305,response to oxygen radical|GO:1990267,response to transition metal nanoparticle|GO:0000303,response to superoxide|GO:0000302,response to reactive oxygen species|GO:0006801,superoxide metabolic process|GO:0070887,cellular response to chemical stimulus|GO:0001666,response to hypoxia|GO:0044699,single-organism process|GO:0044710,single-organism metabolic p…	GO:0031974,membrane-enclosed lumen|GO:0031012,extracellular matrix|GO:0043229,intracellular organelle|GO:0043227,membrane-bounded organelle|GO:0043226,organelle|GO:0005737,cytoplasm|GO:0031984,organelle subcompartment|GO:0070062,extracellular exosome|GO:0005615,extracellular space|GO:0005634,nucleus|GO:0031988,membrane-bounded vesicle|GO:0044431,Golgi apparatus part|GO:0005794,Golgi apparatus|GO:…	GO:1901681,sulfur compound binding|GO:0016721,oxidoreductase activity, acting on superoxide radicals as acceptor|GO:0046872,metal ion binding|GO:0005488,binding|GO:0046914,transition metal ion binding|GO:0043169,cation binding|GO:0097367,carbohydrate derivative binding|GO:0016209,antioxidant activity|GO:0043167,ion binding|GO:0043168,anion binding|GO:0005539,glycosaminoglycan binding|GO:0003824,c…				http://www.uniprot.org/uniprot/P08294	False
Q687X5	0.124913	-3.001	Q687X5	STEAP4	GO:0050801,ion homeostasis|GO:0030154,cell differentiation|GO:0042592,homeostatic process|GO:0055072,iron ion homeostasis|GO:0006826,iron ion transport|GO:0006825,copper ion transport|GO:0098771,inorganic ion homeostasis|GO:0045444,fat cell differentiation|GO:0044699,single-organism process|GO:0044710,single-organism metabolic process|GO:0048869,cellular developmental process|GO:0099587,inorganic…	GO:0043229,intracellular organelle|GO:0071944,cell periphery|GO:0005622,intracellular|GO:0031226,intrinsic component of plasma membrane|GO:0043226,organelle|GO:0031224,intrinsic component of membrane|GO:0005737,cytoplasm|GO:0031982,vesicle|GO:0043227,membrane-bounded organelle|GO:0016021,integral component of membrane|GO:0016020,membrane|GO:0070062,extracellular exosome|GO:0031988,membrane-bounde…	GO:0043169,cation binding|GO:0016722,oxidoreductase activity, oxidizing metal ions|GO:0016723,oxidoreductase activity, oxidizing metal ions, NAD or NADP as acceptor|GO:0046872,metal ion binding|GO:0043167,ion binding|GO:0052851,ferric-chelate reductase (NADPH) activity|GO:0003824,catalytic activity|GO:0005488,binding|GO:0008823,cupric reductase activity|GO:0016491,oxidoreductase activity|GO:19013…				http://www.uniprot.org/uniprot/Q687X5	False
Q5U0D2	0.121329	-3.043	Q5U0D2	TAGLN			GO:0008092,cytoskeletal protein binding|GO:0051015,actin filament binding|GO:0003779,actin binding|GO:0044877,macromolecular complex binding|GO:0005488,binding|GO:0005515,protein binding|GO:0032403,protein complex binding				http://www.uniprot.org/uniprot/Q5U0D2	False
P31949	0.120993	-3.047	P31949	S100A11	GO:0044238,primary metabolic process|GO:0009892,negative regulation of metabolic process|GO:0080090,regulation of primary metabolic process|GO:0009890,negative regulation of biosynthetic process|GO:0031327,negative regulation of cellular biosynthetic process|GO:0031326,regulation of cellular biosynthetic process|GO:0031324,negative regulation of cellular metabolic process|GO:0031323,regulation of…	GO:0031974,membrane-enclosed lumen|GO:0043229,intracellular organelle|GO:0043227,membrane-bounded organelle|GO:0043226,organelle|GO:0005737,cytoplasm|GO:0001726,ruffle|GO:1903561,extracellular vesicle|GO:0070062,extracellular exosome|GO:0031981,nuclear lumen|GO:0005615,extracellular space|GO:0005634,nucleus|GO:0031988,membrane-bounded vesicle|GO:0005654,nucleoplasm|GO:0031252,cell leading edge|GO…	GO:0005488,binding|GO:0043169,cation binding|GO:0044548,S100 protein binding|GO:0048306,calcium-dependent protein binding|GO:0043167,ion binding|GO:0005509,calcium ion binding|GO:0005515,protein binding|GO:0046983,protein dimerization activity|GO:0046872,metal ion binding|GO:0042802,identical protein binding|GO:0042803,protein homodimerization activity|GO:0050839,cell adhesion molecule binding|GO…				http://www.uniprot.org/uniprot/P31949	False
P04839	0.117848	-3.085	P04839	CYBB	GO:0006954,inflammatory response|GO:0051234,establishment of localization|GO:0042554,superoxide anion generation|GO:0006950,response to stress|GO:0051049,regulation of transport|GO:0007167,enzyme linked receptor protein signaling pathway|GO:0044249,cellular biosynthetic process|GO:0042590,antigen processing and presentation of exogenous peptide antigen via MHC class I|GO:0023052,signaling|GO:0007…	GO:0005887,integral component of plasma membrane|GO:1990204,oxidoreductase complex|GO:0030139,endocytic vesicle|GO:0043229,intracellular organelle|GO:0071944,cell periphery|GO:0043227,membrane-bounded organelle|GO:0043226,organelle|GO:0031224,intrinsic component of membrane|GO:0005737,cytoplasm|GO:0098797,plasma membrane protein complex|GO:0030666,endocytic vesicle membrane|GO:0031982,vesicle|GO:…	GO:0016175,superoxide-generating NADPH oxidase activity|GO:0005488,binding|GO:0043167,ion binding|GO:1901363,heterocyclic compound binding|GO:1901265,nucleoside phosphate binding|GO:0016491,oxidoreductase activity|GO:0043168,anion binding|GO:0043169,cation binding|GO:0050660,flavin adenine dinucleotide binding|GO:0050664,oxidoreductase activity, acting on NAD(P)H, oxygen as acceptor|GO:0046982,pr…	hsa04621,NOD-like receptor signaling pathway|hsa05140,Leishmaniasis|hsa04670,Leukocyte transendothelial migration|hsa04145,Phagosome|hsa04066,HIF-1 signaling pathway|hsa04933,AGE-RAGE signaling pathway in diabetic complications|hsa04217,Necroptosis|hsa04216,Ferroptosis			http://www.uniprot.org/uniprot/P04839	False
P02679	0.115503	-3.114	P02679	FGG	GO:2001234,negative regulation of apoptotic signaling pathway|GO:0034116,positive regulation of heterotypic cell-cell adhesion|GO:2001236,regulation of extrinsic apoptotic signaling pathway|GO:2001237,negative regulation of extrinsic apoptotic signaling pathway|GO:0019220,regulation of phosphate metabolic process|GO:0080090,regulation of primary metabolic process|GO:0019222,regulation of metaboli…	GO:0009897,external side of plasma membrane|GO:0098552,side of membrane|GO:0031974,membrane-enclosed lumen|GO:0043229,intracellular organelle|GO:0071944,cell periphery|GO:0060205,cytoplasmic membrane-bounded vesicle lumen|GO:0043227,membrane-bounded organelle|GO:0043226,organelle|GO:0005737,cytoplasm|GO:0031983,vesicle lumen|GO:0070062,extracellular exosome|GO:0031093,platelet alpha granule lumen…	GO:0043169,cation binding|GO:0030674,protein binding, bridging|GO:0050839,cell adhesion molecule binding|GO:0005198,structural molecule activity|GO:0043167,ion binding|GO:0005488,binding|GO:0005515,protein binding|GO:0005102,receptor binding|GO:0046872,metal ion binding|GO:0060090,binding, bridging|GO:0042803,protein homodimerization activity|GO:0046983,protein dimerization activity|GO:0042802,id…	hsa04611,Platelet activation|hsa04610,Complement and coagulation cascades|hsa05150,Staphylococcus aureus infection			http://www.uniprot.org/uniprot/P02679	False
P21980	0.114944	-3.121	P21980	TGM2	GO:0006909,phagocytosis|GO:0007165,signal transduction|GO:0098771,inorganic ion homeostasis|GO:0051561,positive regulation of mitochondrial calcium ion concentration|GO:0051560,mitochondrial calcium ion homeostasis|GO:0051716,cellular response to stimulus|GO:0045785,positive regulation of cell adhesion|GO:0048513,animal organ development|GO:0048518,positive regulation of biological process|GO:005…	GO:0005783,endoplasmic reticulum|GO:0043229,intracellular organelle|GO:0071944,cell periphery|GO:0005924,cell-substrate adherens junction|GO:0005925,focal adhesion|GO:0043227,membrane-bounded organelle|GO:0043226,organelle|GO:0031224,intrinsic component of membrane|GO:0030055,cell-substrate junction|GO:0005737,cytoplasm|GO:0031982,vesicle|GO:0031226,intrinsic component of plasma membrane|GO:00160…	GO:0043169,cation binding|GO:0003810,protein-glutamine gamma-glutamyltransferase activity|GO:0043167,ion binding|GO:0003824,catalytic activity|GO:0016740,transferase activity|GO:0016746,transferase activity, transferring acyl groups|GO:0005488,binding|GO:0005515,protein binding|GO:0016755,transferase activity, transferring amino-acyl groups|GO:0046872,metal ion binding|GO:1901363,heterocyclic com…	hsa05016,Huntington disease			http://www.uniprot.org/uniprot/P21980	False
P04114	0.113204	-3.143	P04114	APOB	GO:0044238,primary metabolic process|GO:0007599,hemostasis|GO:0080090,regulation of primary metabolic process|GO:0019222,regulation of metabolic process|GO:0007596,blood coagulation|GO:0032870,cellular response to hormone stimulus|GO:0034645,cellular macromolecule biosynthetic process|GO:0072359,circulatory system development|GO:0072358,cardiovascular system development|GO:0007165,signal transduc…	GO:0097458,neuron part|GO:0034359,mature chylomicron|GO:0005783,endoplasmic reticulum|GO:0034361,very-low-density lipoprotein particle|GO:0015629,actin cytoskeleton|GO:0042627,chylomicron|GO:0005788,endoplasmic reticulum lumen|GO:0005789,endoplasmic reticulum membrane|GO:0030139,endocytic vesicle|GO:0042175,nuclear outer membrane-endoplasmic reticulum membrane network|GO:0043229,intracellular org…	GO:0005319,lipid transporter activity|GO:1901681,sulfur compound binding|GO:0005102,receptor binding|GO:0022892,substrate-specific transporter activity|GO:0035473,lipase binding|GO:0097367,carbohydrate derivative binding|GO:0005215,transporter activity|GO:0005543,phospholipid binding|GO:0008289,lipid binding|GO:0017127,cholesterol transporter activity|GO:0043168,anion binding|GO:0005539,glycosami…	hsa04979,Cholesterol metabolism|hsa04975,Fat digestion and absorption|hsa04977,Vitamin digestion and absorption		D08946,Mipomersen sodium (USAN); Kynamro (TN)	http://www.uniprot.org/uniprot/P04114	False
Q9NXG2	0.106579	-3.23	Q9NXG2	THUMPD1	GO:0009451,RNA modification|GO:0090304,nucleic acid metabolic process|GO:0034641,cellular nitrogen compound metabolic process|GO:0006807,nitrogen compound metabolic process|GO:0034660,ncRNA metabolic process|GO:0071840,cellular component organization or biogenesis|GO:0034470,ncRNA processing|GO:0006139,nucleobase-containing compound metabolic process|GO:0044260,cellular macromolecule metabolic pr…	GO:0044446,intracellular organelle part|GO:0043231,intracellular membrane-bounded organelle|GO:0031981,nuclear lumen|GO:0043233,organelle lumen|GO:0005634,nucleus|GO:0044464,cell part|GO:0031974,membrane-enclosed lumen|GO:0005622,intracellular|GO:0005654,nucleoplasm|GO:0070013,intracellular organelle lumen|GO:0043229,intracellular organelle|GO:0044428,nuclear part|GO:0005623,cell|GO:0044424,intra…	GO:0097159,organic cyclic compound binding|GO:0044822,poly(A) RNA binding|GO:0005488,binding|GO:0003676,nucleic acid binding|GO:1901363,heterocyclic compound binding|GO:0003723,RNA binding|GO:0005515,protein binding				http://www.uniprot.org/uniprot/Q9NXG2	False
P22105	0.104821	-3.254	P22105	TNXB	GO:0019220,regulation of phosphate metabolic process|GO:0080090,regulation of primary metabolic process|GO:0019222,regulation of metabolic process|GO:0048583,regulation of response to stimulus|GO:0007160,cell-matrix adhesion|GO:0007165,signal transduction|GO:0023014,signal transduction by protein phosphorylation|GO:0044710,single-organism metabolic process|GO:0043206,extracellular fibril organiza…	GO:0031012,extracellular matrix|GO:0043227,membrane-bounded organelle|GO:0043226,organelle|GO:0070062,extracellular exosome|GO:0005583,fibrillar collagen trimer|GO:0031988,membrane-bounded vesicle|GO:0098644,complex of collagen trimers|GO:0098643,banded collagen fibril|GO:0031982,vesicle|GO:0032991,macromolecular complex|GO:1903561,extracellular vesicle|GO:0005615,extracellular space|GO:0043234,p…	GO:1901681,sulfur compound binding|GO:0005178,integrin binding|GO:0050839,cell adhesion molecule binding|GO:0097367,carbohydrate derivative binding|GO:0043168,anion binding|GO:0005539,glycosaminoglycan binding|GO:0043167,ion binding|GO:0044877,macromolecular complex binding|GO:0005488,binding|GO:0005515,protein binding|GO:0032403,protein complex binding|GO:0005102,receptor binding|GO:0005518,coll…	hsa05165,Human papillomavirus infection|hsa05206,MicroRNAs in cancer|hsa04512,ECM-receptor interaction|hsa04510,Focal adhesion|hsa04151,PI3K-Akt signaling pathway			http://www.uniprot.org/uniprot/P22105	False
P35555	0.104676	-3.256	P35555	FBN1	GO:0044238,primary metabolic process|GO:0080090,regulation of primary metabolic process|GO:0019222,regulation of metabolic process|GO:0048585,negative regulation of response to stimulus|GO:0048583,regulation of response to stimulus|GO:0030509,BMP signaling pathway|GO:0072359,circulatory system development|GO:0072358,cardiovascular system development|GO:0007165,signal transduction|GO:0007166,cell …	GO:0005604,basement membrane|GO:0043205,fibril|GO:0070062,extracellular exosome|GO:0044421,extracellular region part|GO:0065010,extracellular membrane-bounded organelle|GO:0031988,membrane-bounded vesicle|GO:0031012,extracellular matrix|GO:0043226,organelle|GO:0043230,extracellular organelle|GO:0043227,membrane-bounded organelle|GO:0005576,extracellular region|GO:0005615,extracellular space|GO:00…	GO:0005178,integrin binding|GO:0005201,extracellular matrix structural constituent|GO:0050839,cell adhesion molecule binding|GO:0043169,cation binding|GO:0030023,extracellular matrix constituent conferring elasticity|GO:0005198,structural molecule activity|GO:0043167,ion binding|GO:0044877,macromolecular complex binding|GO:0005509,calcium ion binding|GO:0005515,protein binding|GO:0032403,protein …	hsa04350,TGF-beta signaling pathway			http://www.uniprot.org/uniprot/P35555	False
P00325	0.101532	-3.3	P00325	ADH1B	GO:0071704,organic substance metabolic process|GO:0044710,single-organism metabolic process|GO:0008152,metabolic process|GO:0006805,xenobiotic metabolic process|GO:0044699,single-organism process|GO:0009410,response to xenobiotic stimulus|GO:0009987,cellular process|GO:0051716,cellular response to stimulus|GO:0044237,cellular metabolic process|GO:0006066,alcohol metabolic process|GO:0006067,ethan…	GO:0005737,cytoplasm|GO:0005829,cytosol|GO:0044464,cell part|GO:0005623,cell|GO:0005622,intracellular|GO:0044444,cytoplasmic part|GO:0044424,intracellular part|GO:0031974,membrane-enclosed lumen|GO:0043229,intracellular organelle|GO:0071944,cell periphery|GO:0043227,membrane-bounded organelle|GO:0043226,organelle|GO:0031981,nuclear lumen|GO:0005634,nucleus|GO:0016020,membrane|GO:0005654,nucleopla…	GO:0005488,binding|GO:0043169,cation binding|GO:0016614,oxidoreductase activity, acting on CH-OH group of donors|GO:0046914,transition metal ion binding|GO:0016616,oxidoreductase activity, acting on the CH-OH group of donors, NAD or NADP as acceptor|GO:0004024,alcohol dehydrogenase activity, zinc-dependent|GO:0004022,alcohol dehydrogenase (NAD) activity|GO:0043167,ion binding|GO:0003824,catalytic…	hsa00980,Metabolism of xenobiotics by cytochrome P450|hsa00982,Drug metabolism - cytochrome P450|hsa00830,Retinol metabolism|hsa01100,Metabolic pathways|hsa00071,Fatty acid degradation|hsa05204,Chemical carcinogenesis|hsa00010,Glycolysis / Gluconeogenesis|hsa00350,Tyrosine metabolism		D00707,Fomepizole (JAN/USAN/INN); Antizol (TN)	http://www.uniprot.org/uniprot/P00325	False
P51911	0.100551	-3.314	P51911	CNN1	GO:0031032,actomyosin structure organization|GO:0030036,actin cytoskeleton organization|GO:0006940,regulation of smooth muscle contraction|GO:0003012,muscle system process|GO:0050789,regulation of biological process|GO:0071840,cellular component organization or biogenesis|GO:0030029,actin filament-based process|GO:0044057,regulation of system process|GO:0016043,cellular component organization|GO:…	GO:0005856,cytoskeleton|GO:0043232,intracellular non-membrane-bounded organelle|GO:0070161,anchoring junction|GO:0044464,cell part|GO:0005623,cell|GO:0005622,intracellular|GO:0043229,intracellular organelle|GO:0043228,non-membrane-bounded organelle|GO:0005912,adherens junction|GO:0044424,intracellular part|GO:0005924,cell-substrate adherens junction|GO:0005925,focal adhesion|GO:0043226,organelle|…	GO:0008092,cytoskeletal protein binding|GO:0003779,actin binding|GO:0005488,binding|GO:0005515,protein binding|GO:0005516,calmodulin binding				http://www.uniprot.org/uniprot/P51911	False
Q04941	0.0897465	-3.478	Q04941	PLP2	GO:0019221,cytokine-mediated signaling pathway|GO:0023052,signaling|GO:0007165,signal transduction|GO:0007166,cell surface receptor signaling pathway|GO:0042221,response to chemical|GO:0070887,cellular response to chemical stimulus|GO:0050789,regulation of biological process|GO:0044699,single-organism process|GO:0034097,response to cytokine|GO:0051716,cellular response to stimulus|GO:0042330,taxi…	GO:0005783,endoplasmic reticulum|GO:0005789,endoplasmic reticulum membrane|GO:0042175,nuclear outer membrane-endoplasmic reticulum membrane network|GO:0043229,intracellular organelle|GO:0071944,cell periphery|GO:0043227,membrane-bounded organelle|GO:0043226,organelle|GO:0031224,intrinsic component of membrane|GO:0005737,cytoplasm|GO:0031982,vesicle|GO:0016021,integral component of membrane|GO:001…	GO:0022891,substrate-specific transmembrane transporter activity|GO:0022892,substrate-specific transporter activity|GO:0019956,chemokine binding|GO:0005215,transporter activity|GO:0019955,cytokine binding|GO:0015075,ion transmembrane transporter activity|GO:0022857,transmembrane transporter activity|GO:0005488,binding|GO:0005515,protein binding				http://www.uniprot.org/uniprot/Q04941	False
Q16647	0.0865693	-3.53	Q16647	PTGIS	GO:0080090,regulation of primary metabolic process|GO:0019222,regulation of metabolic process|GO:0048585,negative regulation of response to stimulus|GO:0048584,positive regulation of response to stimulus|GO:0048583,regulation of response to stimulus|GO:0045765,regulation of angiogenesis|GO:0031348,negative regulation of defense response|GO:0072359,circulatory system development|GO:0044710,single-…	GO:0098590,plasma membrane region|GO:0005783,endoplasmic reticulum|GO:0044421,extracellular region part|GO:0005789,endoplasmic reticulum membrane|GO:0005901,caveola|GO:0043229,intracellular organelle|GO:0071944,cell periphery|GO:0044853,plasma membrane raft|GO:0043227,membrane-bounded organelle|GO:0043226,organelle|GO:0031224,intrinsic component of membrane|GO:0005737,cytoplasm|GO:0031090,organel…	GO:0043169,cation binding|GO:0004497,monooxygenase activity|GO:0046872,metal ion binding|GO:0016853,isomerase activity|GO:0008116,prostaglandin-I synthase activity|GO:0046906,tetrapyrrole binding|GO:0097159,organic cyclic compound binding|GO:0016705,oxidoreductase activity, acting on paired donors, with incorporation or reduction of molecular oxygen|GO:0046914,transition metal ion binding|GO:0020…	hsa00590,Arachidonic acid metabolism|hsa01100,Metabolic pathways			http://www.uniprot.org/uniprot/Q16647	False
P02792	0.0860906	-3.538	P02792	FTL	GO:0050801,ion homeostasis|GO:0051649,establishment of localization in cell|GO:0042592,homeostatic process|GO:0098771,inorganic ion homeostasis|GO:0055072,iron ion homeostasis|GO:0006826,iron ion transport|GO:0055076,transition metal ion homeostasis|GO:0030001,metal ion transport|GO:0044699,single-organism process|GO:0046916,cellular transition metal ion homeostasis|GO:0000041,transition metal io…	GO:0008043,intracellular ferritin complex|GO:0043227,membrane-bounded organelle|GO:0043226,organelle|GO:0005737,cytoplasm|GO:0070288,ferritin complex|GO:0031982,vesicle|GO:0016020,membrane|GO:0031988,membrane-bounded vesicle|GO:0032991,macromolecular complex|GO:1903561,extracellular vesicle|GO:0070062,extracellular exosome|GO:0043234,protein complex|GO:0043230,extracellular organelle|GO:0005829,c…	GO:0043169,cation binding|GO:0046914,transition metal ion binding|GO:0043167,ion binding|GO:0008199,ferric iron binding|GO:0005488,binding|GO:0005515,protein binding|GO:0005506,iron ion binding|GO:0046872,metal ion binding|GO:0042802,identical protein binding|GO:0016722,oxidoreductase activity, oxidizing metal ions|GO:0016724,oxidoreductase activity, oxidizing metal ions, oxygen as acceptor|GO:00…	hsa04978,Mineral absorption|hsa04217,Necroptosis|hsa04216,Ferroptosis	H00043,Neuroblastoma		http://www.uniprot.org/uniprot/P02792	False
Q9UMS6	0.084553	-3.564	Q9UMS6	SYNPO2	GO:0044238,primary metabolic process|GO:0019220,regulation of phosphate metabolic process|GO:0080090,regulation of primary metabolic process|GO:0019222,regulation of metabolic process|GO:0071840,cellular component organization or biogenesis|GO:0032231,regulation of actin filament bundle assembly|GO:0032233,positive regulation of actin filament bundle assembly|GO:0051495,positive regulation of cyt…	GO:0015629,actin cytoskeleton|GO:0030016,myofibril|GO:0030017,sarcomere|GO:0043229,intracellular organelle|GO:0043228,non-membrane-bounded organelle|GO:0005924,cell-substrate adherens junction|GO:0005925,focal adhesion|GO:0043227,membrane-bounded organelle|GO:0043226,organelle|GO:0030054,cell junction|GO:0030055,cell-substrate junction|GO:0005856,cytoskeleton|GO:0005634,nucleus|GO:0031674,I band|…	GO:0051393,alpha-actinin binding|GO:0008092,cytoskeletal protein binding|GO:0051371,muscle alpha-actinin binding|GO:0003779,actin binding|GO:0071889,14-3-3 protein binding|GO:0005488,binding|GO:0005515,protein binding|GO:0042805,actinin binding|GO:0031005,filamin binding|GO:0030674,protein binding, bridging|GO:0060090,binding, bridging				http://www.uniprot.org/uniprot/Q9UMS6	False
Q14767	0.0816728	-3.614	Q14767	LTBP2	GO:0042221,response to chemical|GO:0008104,protein localization|GO:0070887,cellular response to chemical stimulus|GO:0032940,secretion by cell|GO:0023052,signaling|GO:0007165,signal transduction|GO:0007166,cell surface receptor signaling pathway|GO:0007167,enzyme linked receptor protein signaling pathway|GO:0050789,regulation of biological process|GO:0044699,single-organism process|GO:0009719,res…	GO:0005622,intracellular|GO:0043230,extracellular organelle|GO:0070062,extracellular exosome|GO:0044421,extracellular region part|GO:0043227,membrane-bounded organelle|GO:0044464,cell part|GO:0005623,cell|GO:0031012,extracellular matrix|GO:0043226,organelle|GO:0005576,extracellular region|GO:0005615,extracellular space|GO:0031988,membrane-bounded vesicle|GO:1903561,extracellular vesicle|GO:006501…	GO:1901681,sulfur compound binding|GO:0043168,anion binding|GO:0043169,cation binding|GO:0097367,carbohydrate derivative binding|GO:0019838,growth factor binding|GO:0043167,ion binding|GO:0005539,glycosaminoglycan binding|GO:0005509,calcium ion binding|GO:0005515,protein binding|GO:0046872,metal ion binding|GO:0008201,heparin binding|GO:0005488,binding|GO:0005201,extracellular matrix structural c…				http://www.uniprot.org/uniprot/Q14767	False
P02655	0.0741197	-3.754	P02655	APOC2	GO:0009628,response to abiotic stimulus|GO:0019220,regulation of phosphate metabolic process|GO:0080090,regulation of primary metabolic process|GO:0034447,very-low-density lipoprotein particle clearance|GO:0051049,regulation of transport|GO:0006820,anion transport|GO:0007165,signal transduction|GO:0044283,small molecule biosynthetic process|GO:0048261,negative regulation of receptor-mediated endo…	GO:0034358,plasma lipoprotein particle|GO:0044421,extracellular region part|GO:0043229,intracellular organelle|GO:1990777,lipoprotein particle|GO:0005622,intracellular|GO:0043227,membrane-bounded organelle|GO:0043226,organelle|GO:0005737,cytoplasm|GO:0042627,chylomicron|GO:0031982,vesicle|GO:0005615,extracellular space|GO:0031988,membrane-bounded vesicle|GO:0034361,very-low-density lipoprotein pa…	GO:0005488,binding|GO:0098772,molecular function regulator|GO:0046983,protein dimerization activity|GO:0030234,enzyme regulator activity|GO:0060230,lipoprotein lipase activator activity|GO:0008289,lipid binding|GO:0019899,enzyme binding|GO:0042803,protein homodimerization activity|GO:0043274,phospholipase binding|GO:0008047,enzyme activator activity|GO:0005515,protein binding|GO:0004857,enzyme in…	hsa04979,Cholesterol metabolism			http://www.uniprot.org/uniprot/P02655	False
P08123	0.0735567	-3.765	P08123	COL1A2	GO:0007599,hemostasis|GO:0007596,blood coagulation|GO:0001501,skeletal system development|GO:0072359,circulatory system development|GO:0072358,cardiovascular system development|GO:0007165,signal transduction|GO:0007166,cell surface receptor signaling pathway|GO:0007167,enzyme linked receptor protein signaling pathway|GO:0071840,cellular component organization or biogenesis|GO:0044712,single-organ…	GO:0005783,endoplasmic reticulum|GO:0044421,extracellular region part|GO:0031974,membrane-enclosed lumen|GO:0031012,extracellular matrix|GO:0043229,intracellular organelle|GO:0043227,membrane-bounded organelle|GO:0043226,organelle|GO:0005584,collagen type I trimer|GO:0070062,extracellular exosome|GO:0005583,fibrillar collagen trimer|GO:0005615,extracellular space|GO:0031988,membrane-bounded vesic…	GO:0043169,cation binding|GO:0005201,extracellular matrix structural constituent|GO:0005198,structural molecule activity|GO:0030674,protein binding, bridging|GO:0043167,ion binding|GO:0046332,SMAD binding|GO:0019838,growth factor binding|GO:0005488,binding|GO:0005515,protein binding|GO:0048407,platelet-derived growth factor binding|GO:0046872,metal ion binding|GO:0042802,identical protein binding…	hsa05146,Amoebiasis|hsa04611,Platelet activation|hsa04974,Protein digestion and absorption|hsa05205,Proteoglycans in cancer|hsa04512,ECM-receptor interaction|hsa04510,Focal adhesion|hsa05165,Human papillomavirus infection|hsa04926,Relaxin signaling pathway|hsa04151,PI3K-Akt signaling pathway|hsa04933,AGE-RAGE signaling pathway in diabetic complications			http://www.uniprot.org/uniprot/P08123	False
P16671	0.0734548	-3.767	P16671	CD36	GO:0033157,regulation of intracellular protein transport|GO:0051169,nuclear transport|GO:0006909,phagocytosis|GO:0051049,regulation of transport|GO:0007596,blood coagulation|GO:0002702,positive regulation of production of molecular mediator of immune response|GO:0002700,regulation of production of molecular mediator of immune response|GO:0007599,hemostasis|GO:0051716,cellular response to stimulus…	GO:0009897,external side of plasma membrane|GO:0005887,integral component of plasma membrane|GO:0044421,extracellular region part|GO:0030139,endocytic vesicle|GO:0043229,intracellular organelle|GO:0071944,cell periphery|GO:0098552,side of membrane|GO:0043227,membrane-bounded organelle|GO:0043226,organelle|GO:0031224,intrinsic component of membrane|GO:0005737,cytoplasm|GO:0030667,secretory granule…	GO:0038024,cargo receptor activity|GO:0038023,signaling receptor activity|GO:0030228,lipoprotein particle receptor activity|GO:0019955,cytokine binding|GO:0060089,molecular transducer activity|GO:0044877,macromolecular complex binding|GO:0005488,binding|GO:0004871,signal transducer activity|GO:0050431,transforming growth factor beta binding|GO:0038187,pattern recognition receptor activity|GO:0019…	hsa04975,Fat digestion and absorption|hsa04979,Cholesterol metabolism|hsa03320,PPAR signaling pathway|hsa05144,Malaria|hsa04145,Phagosome|hsa04640,Hematopoietic cell lineage|hsa04512,ECM-receptor interaction|hsa04152,AMPK signaling pathway|hsa04931,Insulin resistance|hsa04920,Adipocytokine signaling pathway			http://www.uniprot.org/uniprot/P16671	False
[truncated: 15 more rows]
