# Supplementary material
Source: Research Square preprint supplement (doi:10.21203/rs.3.rs-8693915/v1)
Supplement: Supplementary file 1 [file 426388d1676a010f5f4c7021.pdf]

Ref: 260279

Permission is granted to Scientific Reports of Springer Nature Ltd to publish both in print and digital under the CC BY 4.0 open access license the result of using KEGG and the following KEGG images in the article "EMT Dysfunction in Renal Primitive Vesicle Cells Drives Poor Prognosis in Wilms' Tumor via hnRNP A1 and PARP1-Mediated TGF- $\beta$ /NF- $\kappa$ B Signaling" written by Zhiqing Wu, Jianbin Wang, Xi Zhuang, Lizhi Li and colleagues:

- TGF-beta signaling pathway (hsa04350)
- NF-kappa B signaling pathway (hsa04064)
- Necroptosis (hsa04217)
- Spliceosome (hsa03040)

subject to the condition that the original source is acknowledged by citing at least one KEGG paper.

Permission granted:

*Yixuan Song*

Yixuan Song, Kanehisa Laboratories

Date: 2 February 2026

Copyright holder: Kanehisa Laboratories
