# Supplementary material
Source: Research Square preprint supplement (doi:10.21203/rs.3.rs-8693915/v1)
Supplement: Supplementary file 2 [file a676c7d9f8cdf71cdb4cb6c5.pdf]

## Supplementary Information

Figure S1. Original cropped membranes of the Western blots in this study

Note: Full-length uncropped Western blot membranes were not preserved during the experiment.

Only the cropped regions corresponding to the target proteins (PARP1, hnRNP A1) and the loading control ( $\beta$ -actin) were retained.

Image clarity is limited due to long-term storage.

All blots are representative of at least three independent biological replicates.

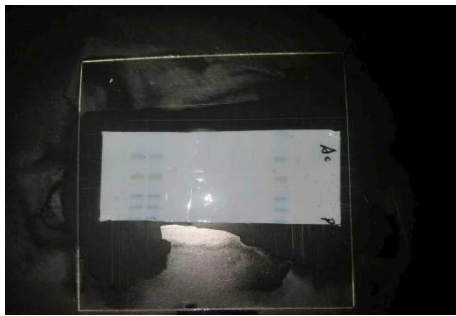

Panel A: Original cropped membrane for  $\beta$ -actin (loading control).

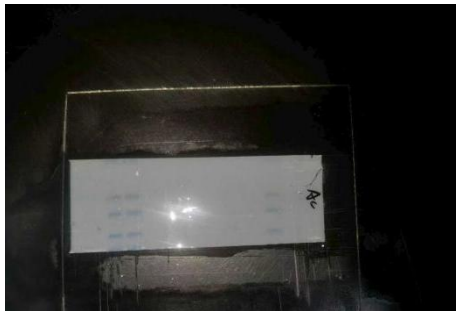

Panel B: Original cropped membrane for PARP1.

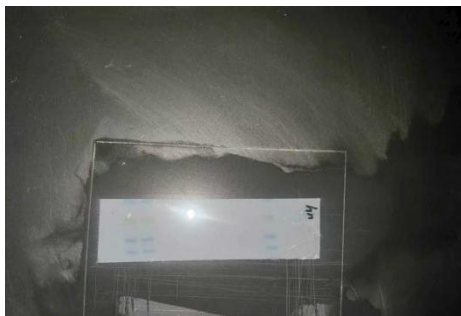

Panel C: Original cropped membrane for hnRNP A1.
