# Supplementary material
Source: Research Square preprint supplement (doi:10.21203/rs.3.rs-8693915/v1)
Supplement: Supplementary file 2 [file a06515bc46044ce58266a91b.xlsx]

## Sheet: Table S1. Patient Information
Name	Gender	Age	Pathology	Location	Diagnosis	Stage
Patient1	Female	2 years	Wilms tumor, embryonal type, high risk, involving perirenal adipose tissue, thrombosis seen in blood vessels.	Right kidney area	Right Wilms tumor	Stage II
Patient2	Male	4 years	Wilms tumor, embryonal type, tumor infiltrating renal parenchyma, invading perirenal fat, invading renal pelvis, thrombosis seen in blood vessels.	Middle-lower pole of right kidney	Right Wilms tumor	Stage II
Patient3	Male	3 years	(Retroperitoneal mass): Wilms tumor with cystic differentiation, primarily embryonal type, high risk, involving renal sinus fat, thrombosis seen in blood vessels.	Middle-upper pole of left kidney	Left Wilms tumor Stage IV (high-risk group	Stage IV
Patient4	Male	2 years	(Retroperitoneal mass): malignant tumor, comprehensive sampling reveals solid clusters of small blue round cells, glandular tubular papillary components, and neuroblast-like components, accompanied by necrosis.	Right kidney area	Right Wilms tumor	Stage III
Patient5	Female	4 years	Wilms tumor (embryonal type; high risk), invading renal capsule and perirenal adipose tissue, invading renal pelvis mucosa, thrombosis seen in blood vessels.	Right kidney area	Right Wilms tumor (embryonal type, Stage IV)	Stage IV
Patient6	Male	6 years	Renal clear cell sarcoma, with vascular thrombosis.	Renal pelvis of left kidney	Left Wilms tumor (Stage II, FH type)	Stage II
Patient7	Male	3 years	Nodular Wilms tumor of middle-lower pole of kidney, primarily embryonal type, showing multifocal necrosis, tumor infiltrating renal parenchyma, invading renal capsule, invading the mucosal layer of renal pelvis and renal sinus fat, thrombosis seen in blood vessels.	Right kidney area	Right Wilms tumor	Stage II
Patient8	Male	2 years	(Left kidney): Wilms tumor (mixed type) moderate risk, with embryonal type accounting for about 50%; partially mesenchymal type at about 40%, mesenchymal components being immature mesenchymal tissue, some with adipose and muscle differentiation; significant cellular atypia, mitotic figures easily seen (10/10 HPF); a few being epithelial type (accounting for 10%, epithelial components being primit…	Left kidney area	(Left kidney): Wilms tumor (mixed type)	Stage III
Patient9	Male	4 years	(Right kidney) One renal resection specimen, size 11cm×8cm×6cm, a mass seen at the middle-lower pole of the kidney, size 7.5cm×7cm×6cm, closely adjacent to the renal capsule, cut surface gray-white, friable. Ureter length 6.5cm, diameter 0.5cm, unclear demarcation between renal cortex and medulla, thickness about 2.5cm, renal pelvis size 5cm×3.5cm×2cm, vascular ends length 0.5cm, diameter 0.3cm, …	Right kidney area	(Right kidney): Nodular Wilms tumor (embryonal component predominant, with epithelial component)	Stage II
Patient10	Male	3 years	(Tumor of left kidney) One nodule, size 3.5cm×3cm×3cm, appeared to have a capsule, cut surface gray-white, medium texture. All	Left kidney area	(Tumor of left kidney): Based on morphology and immunohistochemical phenotype, consistent with mixed-type Wilms tumor (visible epithelial, embryonal, and rhabdomyoblast differentiation) [Revised SIOP Wilms Tumor Working Classification: Moderate risk tumor], thrombosis seen in blood vessels, no evident nerve invasion. Immunohistochemistry: WT1 (aec)+, CD34 (DAB) (+), CK (pan) (partially +), PAX8 (…	Stage III
Patient11	Male	1 year	1.(Lateral aortic lymph nodes) Found 2 suspected lymph nodes. All 2.(Hilar lymph nodes) Found 1 suspected lymph node. All 3.(Left ureter (silk line is the proximal end of the ureter)) A segment of ureter, length 2cm, diameter 0.4-0.5cm, cut surface gray-white, medium texture. All 4.(Right kidney tumor) A piece of gray-white tissue, size 1cm×0.5cm×0.5cm, cut surface gray-white, medium texture. All…	Left kidney	(Wilms tumor of left kidney): Wilms tumor, mixed type, predominantly mesenchymal type with rhabdomyoblastic differentiation, accompanied by focal necrosis, invading renal parenchyma and renal capsule.	Stage III
Patient12	Male	5 years	1.(Left renal hilum lymph node) Found 1 suspected lymph node. All 2.(Iliac artery lymph node) Found 1 suspected lymph node. All 3.(Lateral aortic lymph node) Found 1 suspected lymph node. All 4.(Left ureter posterior segment?) A segment of ureter, length 1.5cm, diameter 0.3-0.5cm, cut surface gray-white, medium texture. All 5.(Left kidney tumor) One kidney resection specimen, size 13.5cm×7.5cm×6.…	Left kidney	(Left kidney tumor): Mixed-type Wilms tumor (Revised SIOP Wilms Tumor Working Classification: Stage II moderate risk tumor),Stage II

## Sheet: Table S2. Kit of qPCR
ID	Primer Name	Primer Sequence (5'to3')	Base Number
156523967c1	PARP1-1F	CGGAGTCTTCGGATAAGCTCT	21
	1R	TTTCCATCAAACATGGGCGAC	21
156523967c2	PARP1-2F	TGGAAAAGTCCCACACTGGTA	21
	2R	AAGCTCAGAGAACCCATCCAC	21
156523967c3	PARP1-3F	TCTGAGCTTCGGTGGGATGA	20
	3R	TTGGCATACTCTGCTGCAAAG	21
83641893c1	hnRNPA1-1F	TCAGAGTCTCCTAAAGAGCCC	21
	1R	ACCTTGTGTGGCCTTGCAT	19
NM_031157.4	hnRNPA1-2F	GGGAGTGGCAGCTATGACAG	20
	2R	TTCCACTACCACCGCCAAAG	20
	hnRNPA1-3F	AGTGCTTCATCCAGCCAAAGA	21
	3R	CATAGCCACTGCCCTGGTTT	20
346644848c1	APEX1-1F	CCAGCCCTGTATGAGGACC	19
	1R	GGAGCTGACCAGTATTGATGAGA	23
346644848c2	APEX1-2F	CAATACTGGTCAGCTCCTTCG	21
	2R	TGCCGTAAGAAACTTTGAGTGG	22
346644848c3	APEX1-3F	GTTTCTTACGGCATAGGCGAT	21
	3R	CACAAACGAGTCAAATTCAGCC	22
163854302c1	CYBB-1F	ACCGGGTTTATGATATTCCACCT	23
	1R	GATTTCGACAGACTGGCAAGA	21
163854302c2	CYBB-2F	TGCCAGTCTGTCGAAATCTGC	21
	2R	ACTCGGGCATTCACACACC	19
163854302c3	CYBB-3F	AACGAATTGTACGTGGGCAGA	21
	3R	GAGGGTTTCCAGCAAACTGAG	21

## Sheet: Table S3. Proteomics Summary
ID	FoldChange	Log2FoldChange	Uniprot	Genename	Biological Process	Cell Component	Molecular Function	KEGG Pathways	Disease	Drug
Q99496	63.7786	5.995	Q99496	RNF2	GO:0080090,regulation of primary metabolic process|GO:0019222,regulation of metabolic process|GO:0010390,histone monoubiquitination|GO:0048468,cell development|GO:1901362,organic cyclic compound biosynthetic process|GO:0071840,cellular component organization or biogenesis|GO:0044710,single-organism metabolic process|GO:0010605,negative regulation of macromolecule metabolic process|GO:0000003,repr…	GO:0035102,PRC1 complex|GO:0031974,membrane-enclosed lumen|GO:0000151,ubiquitin ligase complex|GO:0043229,intracellular organelle|GO:0043228,non-membrane-bounded organelle|GO:0000785,chromatin|GO:0000152,nuclear ubiquitin ligase complex|GO:0000228,nuclear chromosome|GO:0043227,membrane-bounded organelle|GO:0043226,organelle|GO:0034708,methyltransferase complex|GO:0016604,nuclear body|GO:0031519,P…	GO:0019787,ubiquitin-like protein transferase activity|GO:0043169,cation binding|GO:0046872,metal ion binding|GO:0046914,transition metal ion binding|GO:0016874,ligase activity|GO:0061630,ubiquitin protein ligase activity|GO:0071535,RING-like zinc finger domain binding|GO:0043167,ion binding|GO:0003824,catalytic activity|GO:0016740,transferase activity|GO:0044877,macromolecular complex binding|GO…
Q6FGY1	44.4774	5.475	Q6FGY1	HPCAL1			GO:0043169,cation binding|GO:0043167,ion binding|GO:0005488,binding|GO:0046872,metal ion binding|GO:0005509,calcium ion binding
P61088	23.5556	4.558	P61088	UBE2N	GO:0019221,cytokine-mediated signaling pathway|GO:0019222,regulation of metabolic process|GO:0048584,positive regulation of response to stimulus|GO:0048583,regulation of response to stimulus|GO:0031349,positive regulation of defense response|GO:0007165,signal transduction|GO:0007166,cell surface receptor signaling pathway|GO:0031056,regulation of histone modification|GO:0031058,positive regulatio…	GO:0035370,UBC13-UEV1A complex|GO:0043229,intracellular organelle|GO:0043227,membrane-bounded organelle|GO:0043226,organelle|GO:0005737,cytoplasm|GO:0031982,vesicle|GO:0005634,nucleus|GO:0031988,membrane-bounded vesicle|GO:1902494,catalytic complex|GO:1990234,transferase complex|GO:0032991,macromolecular complex|GO:1903561,extracellular vesicle|GO:0031371,ubiquitin conjugating enzyme complex|GO:0…	GO:0044389,ubiquitin-like protein ligase binding|GO:0035639,purine ribonucleoside triphosphate binding|GO:0019899,enzyme binding|GO:0005488,binding|GO:0003676,nucleic acid binding|GO:0043167,ion binding|GO:1901363,heterocyclic compound binding|GO:0001883,purine nucleoside binding|GO:0001882,nucleoside binding|GO:0019787,ubiquitin-like protein transferase activity|GO:0016874,ligase activity|GO:000…	hsa04120,Ubiquitin mediated proteolysis
Q9NPH2	18.2143	4.187	Q9NPH2	ISYNA1	GO:0044237,cellular metabolic process|GO:0046173,polyol biosynthetic process|GO:0019751,polyol metabolic process|GO:0044249,cellular biosynthetic process|GO:0044281,small molecule metabolic process|GO:0044283,small molecule biosynthetic process|GO:0044699,single-organism process|GO:1901576,organic substance biosynthetic process|GO:0044710,single-organism metabolic process|GO:0044711,single-organi…	GO:0005737,cytoplasm|GO:0005829,cytosol|GO:0044464,cell part|GO:0005623,cell|GO:0005622,intracellular|GO:0044444,cytoplasmic part|GO:0044424,intracellular part	GO:0004512,inositol-3-phosphate synthase activity|GO:0016853,isomerase activity|GO:0003824,catalytic activity|GO:0005488,binding|GO:0005515,protein binding|GO:0016872,intramolecular lyase activity	hsa00562,Inositol phosphate metabolism|hsa01100,Metabolic pathways
O94819	16.6102	4.054	O94819	KBTBD11	GO:0071704,organic substance metabolic process|GO:0044267,cellular protein metabolic process|GO:0044238,primary metabolic process|GO:1901564,organonitrogen compound metabolic process|GO:0044260,cellular macromolecule metabolic process|GO:0032446,protein modification by small protein conjugation|GO:0019538,protein metabolic process|GO:0009987,cellular process|GO:0070647,protein modification by sma…	GO:0043234,protein complex|GO:0032991,macromolecular complex|GO:1902494,catalytic complex|GO:0044464,cell part|GO:0000151,ubiquitin ligase complex|GO:0005623,cell|GO:0005622,intracellular|GO:1990234,transferase complex|GO:0044424,intracellular part|GO:0031461,cullin-RING ubiquitin ligase complex|GO:0031463,Cul3-RING ubiquitin ligase complex	GO:0019787,ubiquitin-like protein transferase activity|GO:0003824,catalytic activity|GO:0016740,transferase activity|GO:0004842,ubiquitin-protein transferase activity
P54652	16.1336	4.012	P54652	HSPA2	GO:0090084,negative regulation of inclusion body assembly|GO:0019220,regulation of phosphate metabolic process|GO:0080090,regulation of primary metabolic process|GO:0019222,regulation of metabolic process|GO:0000086,G2/M transition of mitotic cell cycle|GO:0051049,regulation of transport|GO:1901894,regulation of calcium-transporting ATPase activity|GO:1901896,positive regulation of calcium-transp…	GO:0044421,extracellular region part|GO:0005886,plasma membrane|GO:0031974,membrane-enclosed lumen|GO:0043229,intracellular organelle|GO:0043228,non-membrane-bounded organelle|GO:0034702,ion channel complex|GO:0034703,cation channel complex|GO:0000228,nuclear chromosome|GO:0043227,membrane-bounded organelle|GO:0043226,organelle|GO:0031224,intrinsic component of membrane|GO:0005737,cytoplasm|GO:00…	GO:0035639,purine ribonucleoside triphosphate binding|GO:0019899,enzyme binding|GO:0005488,binding|GO:0043167,ion binding|GO:1901363,heterocyclic compound binding|GO:1901265,nucleoside phosphate binding|GO:0001882,nucleoside binding|GO:0043168,anion binding|GO:0051082,unfolded protein binding|GO:0000166,nucleotide binding|GO:0001883,purine nucleoside binding|GO:0032549,ribonucleoside binding|GO:0…	hsa05134,Legionellosis|hsa03040,Spliceosome|hsa04612,Antigen processing and presentation|hsa04915,Estrogen signaling pathway|hsa04141,Protein processing in endoplasmic reticulum|hsa04144,Endocytosis|hsa04010,MAPK signaling pathway|hsa04213,Longevity regulating pathway - multiple species|hsa05145,Toxoplasmosis|hsa05162,Measles
Q14894	16.0667	4.006	Q14894	CRYM	GO:0080090,regulation of primary metabolic process|GO:0019222,regulation of metabolic process|GO:1901362,organic cyclic compound biosynthetic process|GO:1901360,organic cyclic compound metabolic process|GO:0042445,hormone metabolic process|GO:0044710,single-organism metabolic process|GO:0010605,negative regulation of macromolecule metabolic process|GO:0048519,negative regulation of biological pro…	GO:0043231,intracellular membrane-bounded organelle|GO:0005737,cytoplasm|GO:0005622,intracellular|GO:0043230,extracellular organelle|GO:0031982,vesicle|GO:0044421,extracellular region part|GO:0043227,membrane-bounded organelle|GO:0005634,nucleus|GO:0044464,cell part|GO:0044444,cytoplasmic part|GO:0005739,mitochondrion|GO:0031988,membrane-bounded vesicle|GO:0043229,intracellular organelle|GO:00055…	GO:0047127,thiomorpholine-carboxylate dehydrogenase activity|GO:0005488,binding|GO:1901363,heterocyclic compound binding|GO:1901265,nucleoside phosphate binding|GO:0016491,oxidoreductase activity|GO:0050662,coenzyme binding|GO:0050661,NADP binding|GO:0003714,transcription corepressor activity|GO:0016646,oxidoreductase activity, acting on the CH-NH group of donors, NAD or NADP as acceptor|GO:00166…
O75347	15.5949	3.963	O75347	TBCA	GO:0022607,cellular component assembly|GO:0006457,protein folding|GO:0070271,protein complex biogenesis|GO:0043933,macromolecular complex subunit organization|GO:0006458,'de novo' protein folding|GO:0034622,cellular macromolecular complex assembly|GO:0071840,cellular component organization or biogenesis|GO:0007021,tubulin complex assembly|GO:0044267,cellular protein metabolic process|GO:0007023,p…	GO:0031974,membrane-enclosed lumen|GO:0043229,intracellular organelle|GO:0043228,non-membrane-bounded organelle|GO:0005874,microtubule|GO:0043226,organelle|GO:0005856,cytoskeleton|GO:0070062,extracellular exosome|GO:0031981,nuclear lumen|GO:0005730,nucleolus|GO:0043227,membrane-bounded organelle|GO:0005634,nucleus|GO:0031988,membrane-bounded vesicle|GO:0044430,cytoskeletal part|GO:0005737,cytopla…	GO:0015631,tubulin binding|GO:0005515,protein binding|GO:0008092,cytoskeletal protein binding|GO:0097159,organic cyclic compound binding|GO:0044822,poly(A) RNA binding|GO:0051087,chaperone binding|GO:0051082,unfolded protein binding|GO:0003723,RNA binding|GO:0003676,nucleic acid binding|GO:1901363,heterocyclic compound binding|GO:0005488,binding|GO:0048487,beta-tubulin binding
O00442	15.0846	3.915	O00442	RTCA	GO:0016070,RNA metabolic process|GO:0006139,nucleobase-containing compound metabolic process|GO:0044260,cellular macromolecule metabolic process|GO:0044238,primary metabolic process|GO:0009987,cellular process|GO:0006725,cellular aromatic compound metabolic process|GO:0010467,gene expression|GO:0044237,cellular metabolic process|GO:0043170,macromolecule metabolic process|GO:0090304,nucleic acid m…	GO:0044446,intracellular organelle part|GO:0043231,intracellular membrane-bounded organelle|GO:0031981,nuclear lumen|GO:0043233,organelle lumen|GO:0005634,nucleus|GO:0044464,cell part|GO:0031974,membrane-enclosed lumen|GO:0005622,intracellular|GO:0005654,nucleoplasm|GO:0070013,intracellular organelle lumen|GO:0043229,intracellular organelle|GO:0044428,nuclear part|GO:0005623,cell|GO:0044424,intra…	GO:0035639,purine ribonucleoside triphosphate binding|GO:0005488,binding|GO:0003676,nucleic acid binding|GO:0016886,ligase activity, forming phosphoric ester bonds|GO:0043167,ion binding|GO:1901363,heterocyclic compound binding|GO:1901265,nucleoside phosphate binding|GO:0001882,nucleoside binding|GO:0043168,anion binding|GO:0000166,nucleotide binding|GO:0001883,purine nucleoside binding|GO:003254…
P08473	15.0741	3.914	P08473	MME	GO:0044238,primary metabolic process|GO:0080090,regulation of primary metabolic process|GO:0019222,regulation of metabolic process|GO:0003013,circulatory system process|GO:0044281,small molecule metabolic process|GO:1901360,organic cyclic compound metabolic process|GO:0042445,hormone metabolic process|GO:0051716,cellular response to stimulus|GO:0001822,kidney development|GO:0048513,animal organ d…	GO:0008021,synaptic vesicle|GO:0042995,cell projection|GO:0030425,dendrite|GO:0030424,axon|GO:0043229,intracellular organelle|GO:0005903,brush border|GO:0045202,synapse|GO:0005924,cell-substrate adherens junction|GO:0005925,focal adhesion|GO:0043227,membrane-bounded organelle|GO:0043226,organelle|GO:0030054,cell junction|GO:0030055,cell-substrate junction|GO:0005737,cytoplasm|GO:0044306,neuron pr…	GO:0016787,hydrolase activity|GO:0004175,endopeptidase activity|GO:0004222,metalloendopeptidase activity|GO:0046914,transition metal ion binding|GO:0003824,catalytic activity|GO:0033218,amide binding|GO:0043169,cation binding|GO:0043167,ion binding|GO:0008238,exopeptidase activity|GO:0070011,peptidase activity, acting on L-amino acid peptides|GO:0008270,zinc ion binding|GO:0005515,protein binding…	hsa04614,Renin-angiotensin system|hsa04974,Protein digestion and absorption|hsa05010,Alzheimer disease|hsa04640,Hematopoietic cell lineage	H00001,Acute lymphoblastic leukemia (ALL) (precursor B lymphoblastic leukemia)|H00002,Acute lymphoblastic leukemia (ALL) (precursor T lymphoblastic leukemia)	D01070,Candoxatril (JAN/USAN/INN)|D03349,Candoxatrilat (USAN/INN)|D03929,Ecadotril (USAN/INN)|D08464,Racecadotril (INN); Tiorfan (TN); Hidrasec (TN)|D10225,Sacubitril (JAN/USAN/INN)
A0A4Z1	14.7844	3.886	A0A4Z1	CADM1		GO:0044425,membrane part|GO:0016021,integral component of membrane|GO:0016020,membrane|GO:0031224,intrinsic component of membrane
Q9Y617	14.43	3.851	Q9Y617	PSAT1	GO:0019752,carboxylic acid metabolic process|GO:0042364,water-soluble vitamin biosynthetic process|GO:0044249,cellular biosynthetic process|GO:0034641,cellular nitrogen compound metabolic process|GO:0006807,nitrogen compound metabolic process|GO:0044281,small molecule metabolic process|GO:0044283,small molecule biosynthetic process|GO:0009069,serine family amino acid metabolic process|GO:0072524,…	GO:0005737,cytoplasm|GO:0005622,intracellular|GO:0043230,extracellular organelle|GO:0031982,vesicle|GO:0044421,extracellular region part|GO:0043227,membrane-bounded organelle|GO:0005829,cytosol|GO:0044464,cell part|GO:0005623,cell|GO:0031988,membrane-bounded vesicle|GO:0044444,cytoplasmic part|GO:0005576,extracellular region|GO:0044424,intracellular part|GO:1903561,extracellular vesicle|GO:006501…	GO:0004648,O-phospho-L-serine:2-oxoglutarate aminotransferase activity|GO:0003824,catalytic activity|GO:0008483,transaminase activity|GO:0016740,transferase activity|GO:0016769,transferase activity, transferring nitrogenous groups	hsa01200,Carbon metabolism|hsa00750,Vitamin B6 metabolism|hsa01100,Metabolic pathways|hsa01230,Biosynthesis of amino acids|hsa00260,Glycine, serine and threonine metabolism|hsa00270,Cysteine and methionine metabolism
P19022	13.0774	3.709	P19022	CDH2	GO:0043933,macromolecular complex subunit organization|GO:0019220,regulation of phosphate metabolic process|GO:0080090,regulation of primary metabolic process|GO:0019222,regulation of metabolic process|GO:0048585,negative regulation of response to stimulus|GO:0048584,positive regulation of response to stimulus|GO:0048583,regulation of response to stimulus|GO:0061024,membrane organization|GO:00301…	GO:0019897,extrinsic component of plasma membrane|GO:0098590,plasma membrane region|GO:0015629,actin cytoskeleton|GO:0044421,extracellular region part|GO:0019898,extrinsic component of membrane|GO:0014704,intercalated disc|GO:0043229,intracellular organelle|GO:0043228,non-membrane-bounded organelle|GO:0045202,synapse|GO:0005924,cell-substrate adherens junction|GO:0005925,focal adhesion|GO:0043227…	GO:0043169,cation binding|GO:0019899,enzyme binding|GO:0050998,nitric-oxide synthase binding|GO:0045294,alpha-catenin binding|GO:0045295,gamma-catenin binding|GO:0008013,beta-catenin binding|GO:0043167,ion binding|GO:0019901,protein kinase binding|GO:0019900,kinase binding|GO:0019903,protein phosphatase binding|GO:0019902,phosphatase binding|GO:0044877,macromolecular complex binding|GO:0005509,ca…	hsa04514,Cell adhesion molecules|hsa05412,Arrhythmogenic right ventricular cardiomyopathy
A3R0T8	12.8349	3.682	A3R0T8	HIST1H1E	GO:0006479,protein methylation|GO:0080090,regulation of primary metabolic process|GO:0019222,regulation of metabolic process|GO:0051568,histone H3-K4 methylation|GO:1901362,organic cyclic compound biosynthetic process|GO:0071840,cellular component organization or biogenesis|GO:0010605,negative regulation of macromolecule metabolic process|GO:0018193,peptidyl-amino acid modification|GO:0016571,his…	GO:0031974,membrane-enclosed lumen|GO:0044815,DNA packaging complex|GO:0043229,intracellular organelle|GO:0043228,non-membrane-bounded organelle|GO:0000785,chromatin|GO:0000786,nucleosome|GO:0000788,nuclear nucleosome|GO:0000228,nuclear chromosome|GO:0043227,membrane-bounded organelle|GO:0043226,organelle|GO:0031981,nuclear lumen|GO:0005634,nucleus|GO:0044454,nuclear chromosome part|GO:0005694,ch…	GO:0035639,purine ribonucleoside triphosphate binding|GO:0005488,binding|GO:0003676,nucleic acid binding|GO:0003677,DNA binding|GO:0043167,ion binding|GO:1901363,heterocyclic compound binding|GO:1901265,nucleoside phosphate binding|GO:0001882,nucleoside binding|GO:0043168,anion binding|GO:0043169,cation binding|GO:0000166,nucleotide binding|GO:0032561,guanyl ribonucleotide binding|GO:0032564,dATP…
Q14240	12.3121	3.622	Q14240	EIF4A2	GO:0019221,cytokine-mediated signaling pathway|GO:0019222,regulation of metabolic process|GO:0007165,signal transduction|GO:0007166,cell surface receptor signaling pathway|GO:1901362,organic cyclic compound biosynthetic process|GO:1901360,organic cyclic compound metabolic process|GO:0080090,regulation of primary metabolic process|GO:1900260,negative regulation of RNA-directed RNA polymerase activ…	GO:0043234,protein complex|GO:0005737,cytoplasm|GO:0032991,macromolecular complex|GO:0016281,eukaryotic translation initiation factor 4F complex|GO:0044464,cell part|GO:0005623,cell|GO:0005622,intracellular|GO:0044444,cytoplasmic part|GO:0044424,intracellular part|GO:0048471,perinuclear region of cytoplasm|GO:0005829,cytosol|GO:0031974,membrane-enclosed lumen|GO:0043229,intracellular organelle|GO…	GO:0016887,ATPase activity|GO:0008026,ATP-dependent helicase activity|GO:0035639,purine ribonucleoside triphosphate binding|GO:0005488,binding|GO:0003676,nucleic acid binding|GO:0008186,RNA-dependent ATPase activity|GO:0043167,ion binding|GO:1901363,heterocyclic compound binding|GO:0001883,purine nucleoside binding|GO:0001882,nucleoside binding|GO:0043168,anion binding|GO:0042623,ATPase activity,…	hsa03013,RNA transport
Q8WXF1	12.0838	3.595	Q8WXF1	PSPC1	GO:0009892,negative regulation of metabolic process|GO:0080090,regulation of primary metabolic process|GO:0009890,negative regulation of biosynthetic process|GO:0031327,negative regulation of cellular biosynthetic process|GO:0031326,regulation of cellular biosynthetic process|GO:0031324,negative regulation of cellular metabolic process|GO:0031323,regulation of cellular metabolic process|GO:009030…	GO:0031974,membrane-enclosed lumen|GO:0043229,intracellular organelle|GO:0043228,non-membrane-bounded organelle|GO:0005622,intracellular|GO:0043227,membrane-bounded organelle|GO:0043226,organelle|GO:0034399,nuclear periphery|GO:0016604,nuclear body|GO:0031981,nuclear lumen|GO:0005730,nucleolus|GO:0005634,nucleus|GO:0005654,nucleoplasm|GO:0044451,nucleoplasm part|GO:0016363,nuclear matrix|GO:00166…	GO:0044212,transcription regulatory region DNA binding|GO:0003676,nucleic acid binding|GO:0005515,protein binding|GO:0097159,organic cyclic compound binding|GO:0044822,poly(A) RNA binding|GO:0003677,DNA binding|GO:0001067,regulatory region nucleic acid binding|GO:0000166,nucleotide binding|GO:0036094,small molecule binding|GO:0003723,RNA binding|GO:0001047,core promoter binding|GO:0000975,regulat…
P56159	10.8754	3.443	P56159	GFRA1	GO:0032502,developmental process|GO:0044707,single-multicellular organism process|GO:0007169,transmembrane receptor protein tyrosine kinase signaling pathway|GO:0030030,cell projection organization|GO:0007167,enzyme linked receptor protein signaling pathway|GO:0048468,cell development|GO:0006928,movement of cell or subcellular component|GO:0032501,multicellular organismal process|GO:0023052,signa…	GO:0019898,extrinsic component of membrane|GO:0043230,extracellular organelle|GO:0031982,vesicle|GO:0044421,extracellular region part|GO:0043227,membrane-bounded organelle|GO:0016020,membrane|GO:0044464,cell part|GO:0005623,cell|GO:0031988,membrane-bounded vesicle|GO:0031225,anchored component of membrane|GO:0071944,cell periphery|GO:0005576,extracellular region|GO:0005886,plasma membrane|GO:0044…	GO:0005488,binding|GO:0038023,signaling receptor activity|GO:0005515,protein binding|GO:0016167,glial cell-derived neurotrophic factor receptor activity|GO:0060089,molecular transducer activity|GO:0004888,transmembrane signaling receptor activity|GO:0004872,receptor activity|GO:0004871,signal transducer activity|GO:0005102,receptor binding|GO:0004896,cytokine receptor activity|GO:0005088,Ras guan…
P63281	10.748	3.426	P63281	P63281
Q1KMD3	10.5414	3.398	Q1KMD3	HNRNPUL2		GO:0043231,intracellular membrane-bounded organelle|GO:0005634,nucleus|GO:0016020,membrane|GO:0044464,cell part|GO:0005623,cell|GO:0005622,intracellular|GO:0043229,intracellular organelle|GO:0044424,intracellular part|GO:0043227,membrane-bounded organelle|GO:0043226,organelle|GO:0044446,intracellular organelle part|GO:0031981,nuclear lumen|GO:0043233,organelle lumen|GO:0031974,membrane-enclosed l…	GO:0097159,organic cyclic compound binding|GO:0044822,poly(A) RNA binding|GO:0005488,binding|GO:0003676,nucleic acid binding|GO:1901363,heterocyclic compound binding|GO:0003723,RNA binding
O14579	10.1471	3.343	O14579	COPE	GO:0008104,protein localization|GO:0048200,Golgi transport vesicle coating|GO:0006901,vesicle coating|GO:0048205,COPI coating of Golgi vesicle|GO:0006903,vesicle targeting|GO:0061024,membrane organization|GO:0051641,cellular localization|GO:0051640,organelle localization|GO:0051656,establishment of organelle localization|GO:0051650,establishment of vesicle localization|GO:0044699,single-organism …	GO:0043231,intracellular membrane-bounded organelle|GO:0098796,membrane protein complex|GO:0031974,membrane-enclosed lumen|GO:0043229,intracellular organelle|GO:0030117,membrane coat|GO:0005622,intracellular|GO:0030135,coated vesicle|GO:0043226,organelle|GO:0030137,COPI-coated vesicle|GO:0005737,cytoplasm|GO:0005654,nucleoplasm|GO:0031982,vesicle|GO:0030663,COPI-coated vesicle membrane|GO:0030662…	GO:0005488,binding|GO:0005515,protein binding|GO:0005198,structural molecule activity
B7Z4W0	10.112	3.338	B7Z4W0	B7Z4W0	GO:0080090,regulation of primary metabolic process|GO:0019222,regulation of metabolic process|GO:0031326,regulation of cellular biosynthetic process|GO:0031323,regulation of cellular metabolic process|GO:0090304,nucleic acid metabolic process|GO:0044249,cellular biosynthetic process|GO:0034641,cellular nitrogen compound metabolic process|GO:0006807,nitrogen compound metabolic process|GO:0034645,c…	GO:0043231,intracellular membrane-bounded organelle|GO:0005634,nucleus|GO:0044464,cell part|GO:0005623,cell|GO:0005622,intracellular|GO:0043229,intracellular organelle|GO:0044424,intracellular part|GO:0043227,membrane-bounded organelle|GO:0043226,organelle	GO:0005488,binding|GO:0043169,cation binding|GO:0046914,transition metal ion binding|GO:0097159,organic cyclic compound binding|GO:0008135,translation factor activity, RNA binding|GO:0043167,ion binding|GO:0008270,zinc ion binding|GO:0003676,nucleic acid binding|GO:0003746,translation elongation factor activity|GO:0046872,metal ion binding|GO:1901363,heterocyclic compound binding|GO:0003723,RNA b…
Q92841	9.50706	3.249	Q92841	DDX17	GO:0080090,regulation of primary metabolic process|GO:0019222,regulation of metabolic process|GO:0048584,positive regulation of response to stimulus|GO:0048583,regulation of response to stimulus|GO:0007165,signal transduction|GO:1901362,organic cyclic compound biosynthetic process|GO:1901360,organic cyclic compound metabolic process|GO:0007517,muscle organ development|GO:0010604,positive regulati…	GO:0031974,membrane-enclosed lumen|GO:0043229,intracellular organelle|GO:0043228,non-membrane-bounded organelle|GO:0043227,membrane-bounded organelle|GO:0043226,organelle|GO:0031981,nuclear lumen|GO:0005730,nucleolus|GO:0005634,nucleus|GO:0016020,membrane|GO:0005654,nucleoplasm|GO:0043231,intracellular membrane-bounded organelle|GO:0043232,intracellular non-membrane-bounded organelle|GO:0043233,o…	GO:0016887,ATPase activity|GO:0008026,ATP-dependent helicase activity|GO:0035639,purine ribonucleoside triphosphate binding|GO:0005488,binding|GO:0003676,nucleic acid binding|GO:0008186,RNA-dependent ATPase activity|GO:0043167,ion binding|GO:1901363,heterocyclic compound binding|GO:0001883,purine nucleoside binding|GO:0001882,nucleoside binding|GO:0043168,anion binding|GO:0042623,ATPase activity,…
V9HWA2	9.36968	3.228	V9HWA2	HEL-S-166MP		GO:0005737,cytoplasm|GO:0005829,cytosol|GO:0044464,cell part|GO:0005623,cell|GO:0005622,intracellular|GO:0044444,cytoplasmic part|GO:0044424,intracellular part
Q8N684	9.06307	3.18	Q8N684	CPSF7	GO:0022607,cellular component assembly|GO:0032774,RNA biosynthetic process|GO:0070271,protein complex biogenesis|GO:0043933,macromolecular complex subunit organization|GO:0044237,cellular metabolic process|GO:0090304,nucleic acid metabolic process|GO:0044249,cellular biosynthetic process|GO:0034641,cellular nitrogen compound metabolic process|GO:0006807,nitrogen compound metabolic process|GO:0016…	GO:0005849,mRNA cleavage factor complex|GO:0031974,membrane-enclosed lumen|GO:0043229,intracellular organelle|GO:0043227,membrane-bounded organelle|GO:0043226,organelle|GO:0031981,nuclear lumen|GO:0005634,nucleus|GO:0016020,membrane|GO:0005654,nucleoplasm|GO:0044451,nucleoplasm part|GO:0043234,protein complex|GO:0032991,macromolecular complex|GO:0043231,intracellular membrane-bounded organelle|GO…	GO:0005515,protein binding|GO:0097159,organic cyclic compound binding|GO:0044822,poly(A) RNA binding|GO:0000166,nucleotide binding|GO:0036094,small molecule binding|GO:0003723,RNA binding|GO:0003676,nucleic acid binding|GO:1901363,heterocyclic compound binding|GO:1901265,nucleoside phosphate binding|GO:0005488,binding	hsa03015,mRNA surveillance pathway
Q12824	8.97555	3.166	Q12824	SMARCB1	GO:0043044,ATP-dependent chromatin remodeling|GO:0080090,regulation of primary metabolic process|GO:0019222,regulation of metabolic process|GO:1901362,organic cyclic compound biosynthetic process|GO:0071840,cellular component organization or biogenesis|GO:0071684,organism emergence from protective structure|GO:0044710,single-organism metabolic process|GO:0010604,positive regulation of macromolecu…	GO:0097458,neuron part|GO:0031974,membrane-enclosed lumen|GO:0043229,intracellular organelle|GO:0043228,non-membrane-bounded organelle|GO:0000785,chromatin|GO:0000228,nuclear chromosome|GO:0043227,membrane-bounded organelle|GO:0043226,organelle|GO:0001741,XY body|GO:0070603,SWI/SNF superfamily-type complex|GO:0031981,nuclear lumen|GO:0005730,nucleolus|GO:0005634,nucleus|GO:0000803,sex chromosome|…	GO:0001012,RNA polymerase II regulatory region DNA binding|GO:0001159,core promoter proximal region DNA binding|GO:0001158,enhancer sequence-specific DNA binding|GO:0031491,nucleosome binding|GO:0031490,chromatin DNA binding|GO:0031492,nucleosomal DNA binding|GO:0044877,macromolecular complex binding|GO:0005488,binding|GO:0003676,nucleic acid binding|GO:0003677,DNA binding|GO:1901363,heterocyclic…	hsa05225,Hepatocellular carcinoma|hsa04714,Thermogenesis
P50416	8.80303	3.138	P50416	CPT1A	GO:0090087,regulation of peptide transport|GO:0034440,lipid oxidation|GO:0044238,primary metabolic process|GO:0015879,carnitine transport|GO:0080090,regulation of primary metabolic process|GO:0019222,regulation of metabolic process|GO:0051049,regulation of transport|GO:0007610,behavior|GO:0006839,mitochondrial transport|GO:0006820,anion transport|GO:0008104,protein localization|GO:0044281,small m…	GO:0044464,cell part|GO:0098573,intrinsic component of mitochondrial membrane|GO:0019867,outer membrane|GO:0043229,intracellular organelle|GO:0031306,intrinsic component of mitochondrial outer membrane|GO:0031301,integral component of organelle membrane|GO:0031300,intrinsic component of organelle membrane|GO:0032592,integral component of mitochondrial membrane|GO:0043227,membrane-bounded organell…	GO:0016416,O-palmitoyltransferase activity|GO:0003824,catalytic activity|GO:0016740,transferase activity|GO:0016406,carnitine O-acyltransferase activity|GO:0004095,carnitine O-palmitoyltransferase activity|GO:0016747,transferase activity, transferring acyl groups other than amino-acyl groups|GO:0005515,protein binding|GO:0008374,O-acyltransferase activity|GO:0016746,transferase activity, transfer…	hsa01212,Fatty acid metabolism|hsa03320,PPAR signaling pathway|hsa00071,Fatty acid degradation|hsa04931,Insulin resistance|hsa04714,Thermogenesis|hsa04152,AMPK signaling pathway|hsa04922,Glucagon signaling pathway|hsa04920,Adipocytokine signaling pathway		D05292,Oxfenicine (USAN/INN)|D05442,Perhexiline maleate (USAN)|D08340,Perhexiline (INN)
P39687	8.47962	3.084	P39687	ANP32A	GO:0051169,nuclear transport|GO:0080090,regulation of primary metabolic process|GO:0019222,regulation of metabolic process|GO:0031326,regulation of cellular biosynthetic process|GO:0051649,establishment of localization in cell|GO:0031323,regulation of cellular metabolic process|GO:0090304,nucleic acid metabolic process|GO:0044249,cellular biosynthetic process|GO:0034641,cellular nitrogen compound…	GO:0005783,endoplasmic reticulum|GO:0031974,membrane-enclosed lumen|GO:0043229,intracellular organelle|GO:0043227,membrane-bounded organelle|GO:0043226,organelle|GO:0005737,cytoplasm|GO:0031981,nuclear lumen|GO:0005634,nucleus|GO:0005654,nucleoplasm|GO:0048471,perinuclear region of cytoplasm|GO:0012505,endomembrane system|GO:0043231,intracellular membrane-bounded organelle|GO:0043233,organelle lu…	GO:0003676,nucleic acid binding|GO:0097159,organic cyclic compound binding|GO:0044822,poly(A) RNA binding|GO:0003723,RNA binding|GO:0005515,protein binding|GO:1901363,heterocyclic compound binding|GO:0005488,binding|GO:0042393,histone binding
P09651	8.38029	3.067	P09651	HNRNPA1	GO:0015931,nucleobase-containing compound transport|GO:0051169,nuclear transport|GO:0051168,nuclear export|GO:0090304,nucleic acid metabolic process|GO:0034641,cellular nitrogen compound metabolic process|GO:0006807,nitrogen compound metabolic process|GO:0044237,cellular metabolic process|GO:0051641,cellular localization|GO:0044419,interspecies interaction between organisms|GO:0051028,mRNA transp…	GO:0031974,membrane-enclosed lumen|GO:0043229,intracellular organelle|GO:0043228,non-membrane-bounded organelle|GO:0030529,intracellular ribonucleoprotein complex|GO:0043227,membrane-bounded organelle|GO:0043226,organelle|GO:0005856,cytoskeleton|GO:0045111,intermediate filament cytoskeleton|GO:0070062,extracellular exosome|GO:0031981,nuclear lumen|GO:0005634,nucleus|GO:0016020,membrane|GO:0031988…	GO:0043566,structure-specific DNA binding|GO:0005515,protein binding|GO:0097159,organic cyclic compound binding|GO:0044822,poly(A) RNA binding|GO:1901363,heterocyclic compound binding|GO:0000166,nucleotide binding|GO:0036094,small molecule binding|GO:0003727,single-stranded RNA binding|GO:0003723,RNA binding|GO:0003676,nucleic acid binding|GO:0003677,DNA binding|GO:0003697,single-stranded DNA bin…	hsa03040,Spliceosome
Q9UIG0	8.33395	3.059	Q9UIG0	BAZ1B	GO:0080090,regulation of primary metabolic process|GO:0019222,regulation of metabolic process|GO:0048583,regulation of response to stimulus|GO:0072359,circulatory system development|GO:0072358,cardiovascular system development|GO:0007165,signal transduction|GO:1901362,organic cyclic compound biosynthetic process|GO:0071840,cellular component organization or biogenesis|GO:0044710,single-organism m…	GO:0031974,membrane-enclosed lumen|GO:0043229,intracellular organelle|GO:0043228,non-membrane-bounded organelle|GO:0000785,chromatin|GO:0000228,nuclear chromosome|GO:0043227,membrane-bounded organelle|GO:0043226,organelle|GO:0031981,nuclear lumen|GO:0005634,nucleus|GO:0044454,nuclear chromosome part|GO:0005657,replication fork|GO:0005694,chromosome|GO:0000792,heterochromatin|GO:0000793,condensed …	GO:0005488,binding|GO:0042393,histone binding|GO:0035639,purine ribonucleoside triphosphate binding|GO:0044877,macromolecular complex binding|GO:0004672,protein kinase activity|GO:0098772,molecular function regulator|GO:1901363,heterocyclic compound binding|GO:0001883,purine nucleoside binding|GO:0001882,nucleoside binding|GO:0043168,anion binding|GO:0043169,cation binding|GO:0046914,transition m…
Q00534	8.12856	3.023	Q00534	CDK6	GO:0019222,regulation of metabolic process|GO:0048585,negative regulation of response to stimulus|GO:0048583,regulation of response to stimulus|GO:0050680,negative regulation of epithelial cell proliferation|GO:0032844,regulation of homeostatic process|GO:0007160,cell-matrix adhesion|GO:0060322,head development|GO:0007165,signal transduction|GO:0007166,cell surface receptor signaling pathway|GO:0…	GO:0000307,cyclin-dependent protein kinase holoenzyme complex|GO:0031974,membrane-enclosed lumen|GO:0043229,intracellular organelle|GO:0043228,non-membrane-bounded organelle|GO:0043227,membrane-bounded organelle|GO:0043226,organelle|GO:0005856,cytoskeleton|GO:0001726,ruffle|GO:0031981,nuclear lumen|GO:0005813,centrosome|GO:0005634,nucleus|GO:0005815,microtubule organizing center|GO:0005654,nucleo…	GO:0035639,purine ribonucleoside triphosphate binding|GO:0004672,protein kinase activity|GO:0004693,cyclin-dependent protein serine/threonine kinase activity|GO:0043167,ion binding|GO:1901363,heterocyclic compound binding|GO:0001883,purine nucleoside binding|GO:0001882,nucleoside binding|GO:0043168,anion binding|GO:0004674,protein serine/threonine kinase activity|GO:0000166,nucleotide binding|GO:…	hsa05218,Melanoma|hsa05212,Pancreatic cancer|hsa05214,Glioma|hsa04218,Cellular senescence|hsa05169,Epstein-Barr virus infection|hsa05164,Influenza A|hsa05165,Human papillomavirus infection|hsa05167,Kaposi sarcoma-associated herpesvirus infection|hsa05160,Hepatitis C|hsa05162,Measles|hsa05163,Human cytomegalovirus infection|hsa04110,Cell cycle|hsa05206,MicroRNAs in cancer|hsa05200,Pathways in canc…		D10372,Palbociclib (JAN/USAN); Ibrance (TN)|D10652,Palbociclib isethionate (USAN)|D10688,Abemaciclib (USAN)
Q9UHL4	8.01665	3.003	Q9UHL4	DPP7	GO:0044238,primary metabolic process|GO:0019538,protein metabolic process|GO:0043170,macromolecule metabolic process|GO:0071704,organic substance metabolic process|GO:0008152,metabolic process|GO:0006508,proteolysis|GO:0006887,exocytosis|GO:0042119,neutrophil activation|GO:0001775,cell activation|GO:0045321,leukocyte activation|GO:0032940,secretion by cell|GO:0006807,nitrogen compound metabolic p…	GO:0000323,lytic vacuole|GO:0043229,intracellular organelle|GO:0043227,membrane-bounded organelle|GO:0043226,organelle|GO:0005737,cytoplasm|GO:0070062,extracellular exosome|GO:0016023,cytoplasmic, membrane-bounded vesicle|GO:0031410,cytoplasmic vesicle|GO:0031988,membrane-bounded vesicle|GO:0005794,Golgi apparatus|GO:0012505,endomembrane system|GO:1903561,extracellular vesicle|GO:0031982,vesicle|…	GO:0004177,aminopeptidase activity|GO:0017171,serine hydrolase activity|GO:0016787,hydrolase activity|GO:0003824,catalytic activity|GO:0008239,dipeptidyl-peptidase activity|GO:0008238,exopeptidase activity|GO:0070011,peptidase activity, acting on L-amino acid peptides|GO:0008233,peptidase activity|GO:0008236,serine-type peptidase activity|GO:0140096,catalytic activity, acting on a protein
A0A024RAC5	7.90081	2.982	A0A024RAC5	RCC2	GO:0008104,protein localization|GO:0034446,substrate adhesion-dependent cell spreading|GO:0048468,cell development|GO:0007160,cell-matrix adhesion|GO:0060491,regulation of cell projection assembly|GO:0051893,regulation of focal adhesion assembly|GO:0031344,regulation of cell projection organization|GO:0051895,negative regulation of focal adhesion assembly|GO:0048869,cellular developmental process…	GO:0043229,intracellular organelle|GO:0071944,cell periphery|GO:0005622,intracellular|GO:0043227,membrane-bounded organelle|GO:0043226,organelle|GO:0010008,endosome membrane|GO:0005737,cytoplasm|GO:0031982,vesicle|GO:0031410,cytoplasmic vesicle|GO:0005634,nucleus|GO:0016020,membrane|GO:0044433,cytoplasmic vesicle part|GO:0031901,early endosome membrane|GO:0098588,bounding membrane of organelle|GO…	GO:0051020,GTPase binding|GO:0019899,enzyme binding|GO:0017016,Ras GTPase binding|GO:0031267,small GTPase binding|GO:0048365,Rac GTPase binding|GO:0017048,Rho GTPase binding|GO:0005515,protein binding|GO:0005488,binding
Q16352	7.76508	2.957	Q16352	INA	GO:0030154,cell differentiation|GO:0060322,head development|GO:0021762,substantia nigra development|GO:0007275,multicellular organism development|GO:0044699,single-organism process|GO:0007417,central nervous system development|GO:0048869,cellular developmental process|GO:0016043,cellular component organization|GO:0048513,animal organ development|GO:0071840,cellular component organization or bioge…	GO:0016020,membrane|GO:0035770,ribonucleoprotein granule|GO:0031974,membrane-enclosed lumen|GO:0031975,envelope|GO:0043229,intracellular organelle|GO:0043228,non-membrane-bounded organelle|GO:0036464,cytoplasmic ribonucleoprotein granule|GO:0043227,membrane-bounded organelle|GO:0043226,organelle|GO:0005856,cytoskeleton|GO:0045111,intermediate filament cytoskeleton|GO:0031090,organelle membrane|GO…	GO:0005200,structural constituent of cytoskeleton|GO:0005198,structural molecule activity|GO:0098918,structural constituent of synapse|GO:0098973,structural constituent of postsynaptic actin cytoskeleton|GO:0099184,structural constituent of postsynaptic intermediate filament cytoskeleton
P43243	7.63168	2.932	P43243	MATR3	GO:0019222,regulation of metabolic process|GO:0060255,regulation of macromolecule metabolic process|GO:0010608,posttranscriptional regulation of gene expression|GO:0050789,regulation of biological process|GO:0071704,organic substance metabolic process|GO:0010467,gene expression|GO:0065007,biological regulation|GO:0008152,metabolic process|GO:0043170,macromolecule metabolic process|GO:0010468,regu…	GO:0005635,nuclear envelope|GO:0044464,cell part|GO:0031974,membrane-enclosed lumen|GO:0031975,envelope|GO:0043229,intracellular organelle|GO:0043227,membrane-bounded organelle|GO:0043226,organelle|GO:0034399,nuclear periphery|GO:0031090,organelle membrane|GO:0031981,nuclear lumen|GO:0005637,nuclear inner membrane|GO:0005634,nucleus|GO:0016020,membrane|GO:0005654,nucleoplasm|GO:0016363,nuclear ma…	GO:0005488,binding|GO:0043169,cation binding|GO:0046872,metal ion binding|GO:0005515,protein binding|GO:0046914,transition metal ion binding|GO:0097159,organic cyclic compound binding|GO:0044822,poly(A) RNA binding|GO:0000166,nucleotide binding|GO:0036094,small molecule binding|GO:0043167,ion binding|GO:0003723,RNA binding|GO:0003676,nucleic acid binding|GO:0005198,structural molecule activity|GO…
V9HW74	7.50577	2.908	V9HW74	HEL-117	GO:0048468,cell development|GO:0007610,behavior|GO:0016043,cellular component organization|GO:0051654,establishment of mitochondrion localization|GO:0051656,establishment of organelle localization|GO:0071840,cellular component organization or biogenesis|GO:0048869,cellular developmental process|GO:0070647,protein modification by small protein conjugation or removal|GO:0070646,protein modification…	GO:0031974,membrane-enclosed lumen|GO:0030424,axon|GO:0043229,intracellular organelle|GO:0043227,membrane-bounded organelle|GO:0043226,organelle|GO:0005737,cytoplasm|GO:0044306,neuron projection terminus|GO:0031981,nuclear lumen|GO:0043209,myelin sheath|GO:0005634,nucleus|GO:1904115,axon cytoplasm|GO:0005654,nucleoplasm|GO:0097458,neuron part|GO:0043005,neuron projection|GO:0043025,neuronal cell …	GO:0016787,hydrolase activity|GO:0019783,ubiquitin-like protein-specific protease activity|GO:0101005,ubiquitinyl hydrolase activity|GO:0032182,ubiquitin-like protein binding|GO:0004843,thiol-dependent ubiquitin-specific protease activity|GO:0003824,catalytic activity|GO:0036459,thiol-dependent ubiquitinyl hydrolase activity|GO:0070011,peptidase activity, acting on L-amino acid peptides|GO:000548…
P31942	7.30052	2.868	P31942	HNRNPH3	GO:0030154,cell differentiation|GO:0090304,nucleic acid metabolic process|GO:0034641,cellular nitrogen compound metabolic process|GO:0006807,nitrogen compound metabolic process|GO:0044237,cellular metabolic process|GO:0044699,single-organism process|GO:0006139,nucleobase-containing compound metabolic process|GO:0044260,cellular macromolecule metabolic process|GO:0048869,cellular developmental pro…	GO:0044446,intracellular organelle part|GO:0032991,macromolecular complex|GO:0043231,intracellular membrane-bounded organelle|GO:0031981,nuclear lumen|GO:0043233,organelle lumen|GO:0005634,nucleus|GO:0044464,cell part|GO:0031974,membrane-enclosed lumen|GO:0030529,intracellular ribonucleoprotein complex|GO:0005654,nucleoplasm|GO:0070013,intracellular organelle lumen|GO:0043229,intracellular organe…	GO:0005515,protein binding|GO:0097159,organic cyclic compound binding|GO:0044822,poly(A) RNA binding|GO:0000166,nucleotide binding|GO:0036094,small molecule binding|GO:0003723,RNA binding|GO:0003676,nucleic acid binding|GO:1901363,heterocyclic compound binding|GO:1901265,nucleoside phosphate binding|GO:0005488,binding
O75475	7.215	2.851	O75475	PSIP1	GO:0080090,regulation of primary metabolic process|GO:0019222,regulation of metabolic process|GO:0000377,RNA splicing, via transesterification reactions with bulged adenosine as nucleophile|GO:1901362,organic cyclic compound biosynthetic process|GO:0071840,cellular component organization or biogenesis|GO:0000245,spliceosomal complex assembly|GO:0010604,positive regulation of macromolecule metabol…	GO:0031974,membrane-enclosed lumen|GO:0043229,intracellular organelle|GO:0043228,non-membrane-bounded organelle|GO:0000785,chromatin|GO:0000228,nuclear chromosome|GO:0043227,membrane-bounded organelle|GO:0043226,organelle|GO:0034399,nuclear periphery|GO:0031981,nuclear lumen|GO:0005730,nucleolus|GO:0005634,nucleus|GO:0005654,nucleoplasm|GO:0044454,nuclear chromosome part|GO:0005694,chromosome|GO:…	GO:0033613,activating transcription factor binding|GO:0001076,transcription factor activity, RNA polymerase II transcription factor binding|GO:0044877,macromolecular complex binding|GO:0005488,binding|GO:0003676,nucleic acid binding|GO:0003677,DNA binding|GO:1901363,heterocyclic compound binding|GO:0043566,structure-specific DNA binding|GO:0001190,transcriptional activator activity, RNA polymeras…
Q16630	7.20002	2.848	Q16630	CPSF6	GO:0022607,cellular component assembly|GO:0070271,protein complex biogenesis|GO:0043933,macromolecular complex subunit organization|GO:0090304,nucleic acid metabolic process|GO:0034641,cellular nitrogen compound metabolic process|GO:0006807,nitrogen compound metabolic process|GO:0016043,cellular component organization|GO:0043631,RNA polyadenylation|GO:0071840,cellular component organization or bi…	GO:0044464,cell part|GO:0031974,membrane-enclosed lumen|GO:0043229,intracellular organelle|GO:0043227,membrane-bounded organelle|GO:0043226,organelle|GO:0016604,nuclear body|GO:0031981,nuclear lumen|GO:0005634,nucleus|GO:0016020,membrane|GO:0030529,intracellular ribonucleoprotein complex|GO:0005654,nucleoplasm|GO:0044451,nucleoplasm part|GO:0042382,paraspeckles|GO:0043234,protein complex|GO:00329…	GO:0005488,binding|GO:0005515,protein binding|GO:0097159,organic cyclic compound binding|GO:0044822,poly(A) RNA binding|GO:0000166,nucleotide binding|GO:0036094,small molecule binding|GO:0003723,RNA binding|GO:0003676,nucleic acid binding|GO:1901363,heterocyclic compound binding|GO:1901265,nucleoside phosphate binding|GO:0003729,mRNA binding|GO:0032403,protein complex binding|GO:1990448,exon-exon…	hsa03015,mRNA surveillance pathway
Q96CX2	7.13543	2.835	Q96CX2	KCTD12	GO:0051259,protein oligomerization|GO:0022607,cellular component assembly|GO:0071822,protein complex subunit organization|GO:0070271,protein complex biogenesis|GO:0043933,macromolecular complex subunit organization|GO:0006461,protein complex assembly|GO:0051260,protein homooligomerization|GO:0016043,cellular component organization|GO:0065003,macromolecular complex assembly|GO:0044085,cellular com…	GO:0098590,plasma membrane region|GO:0071944,cell periphery|GO:0045202,synapse|GO:0043227,membrane-bounded organelle|GO:0043226,organelle|GO:0030054,cell junction|GO:0097060,synaptic membrane|GO:0070062,extracellular exosome|GO:0098805,whole membrane|GO:0016020,membrane|GO:0031988,membrane-bounded vesicle|GO:0097458,neuron part|GO:0044456,synapse part|GO:0044459,plasma membrane part|GO:0005576,ex…	GO:0097159,organic cyclic compound binding|GO:0044822,poly(A) RNA binding|GO:0005488,binding|GO:0003676,nucleic acid binding|GO:1901363,heterocyclic compound binding|GO:0003723,RNA binding|GO:0005515,protein binding|GO:0042802,identical protein binding
Q9BUQ8	6.95476	2.798	Q9BUQ8	DDX23	GO:0022607,cellular component assembly|GO:0000245,spliceosomal complex assembly|GO:0043933,macromolecular complex subunit organization|GO:0090304,nucleic acid metabolic process|GO:0034641,cellular nitrogen compound metabolic process|GO:0006807,nitrogen compound metabolic process|GO:0044237,cellular metabolic process|GO:0034622,cellular macromolecular complex assembly|GO:0071840,cellular component…	GO:0044421,extracellular region part|GO:0031974,membrane-enclosed lumen|GO:0043229,intracellular organelle|GO:0043228,non-membrane-bounded organelle|GO:0030529,intracellular ribonucleoprotein complex|GO:0043227,membrane-bounded organelle|GO:0043226,organelle|GO:0005737,cytoplasm|GO:0044446,intracellular organelle part|GO:0070062,extracellular exosome|GO:0031981,nuclear lumen|GO:0005730,nucleolus|…	GO:0016887,ATPase activity|GO:0008026,ATP-dependent helicase activity|GO:0035639,purine ribonucleoside triphosphate binding|GO:0005488,binding|GO:0003676,nucleic acid binding|GO:0008186,RNA-dependent ATPase activity|GO:0043167,ion binding|GO:1901363,heterocyclic compound binding|GO:0001883,purine nucleoside binding|GO:0001882,nucleoside binding|GO:0043168,anion binding|GO:0042623,ATPase activity,…	hsa03040,Spliceosome
Q7L014	6.93069	2.793	Q7L014	DDX46	GO:0019222,regulation of metabolic process|GO:0090304,nucleic acid metabolic process|GO:0034641,cellular nitrogen compound metabolic process|GO:0006807,nitrogen compound metabolic process|GO:0044237,cellular metabolic process|GO:0043170,macromolecule metabolic process|GO:0050789,regulation of biological process|GO:1901360,organic cyclic compound metabolic process|GO:0006139,nucleobase-containing …	GO:0031974,membrane-enclosed lumen|GO:0043229,intracellular organelle|GO:0043227,membrane-bounded organelle|GO:0043226,organelle|GO:0016607,nuclear speck|GO:0016604,nuclear body|GO:0031981,nuclear lumen|GO:0005634,nucleus|GO:0005654,nucleoplasm|GO:0044451,nucleoplasm part|GO:0043231,intracellular membrane-bounded organelle|GO:0043233,organelle lumen|GO:0044464,cell part|GO:0005623,cell|GO:0005622…	GO:0016887,ATPase activity|GO:0008026,ATP-dependent helicase activity|GO:0035639,purine ribonucleoside triphosphate binding|GO:0005488,binding|GO:0003676,nucleic acid binding|GO:0008186,RNA-dependent ATPase activity|GO:0043167,ion binding|GO:1901363,heterocyclic compound binding|GO:0001883,purine nucleoside binding|GO:0001882,nucleoside binding|GO:0043168,anion binding|GO:0042623,ATPase activity,…	hsa03040,Spliceosome
P27695	6.87329	2.781	P27695	APEX1	GO:0080090,regulation of primary metabolic process|GO:0019222,regulation of metabolic process|GO:0060249,anatomical structure homeostasis|GO:0048584,positive regulation of response to stimulus|GO:0048583,regulation of response to stimulus|GO:1901362,organic cyclic compound biosynthetic process|GO:0071840,cellular component organization or biogenesis|GO:0044710,single-organism metabolic process|GO…	GO:0005783,endoplasmic reticulum|GO:0031974,membrane-enclosed lumen|GO:0043229,intracellular organelle|GO:0043228,non-membrane-bounded organelle|GO:0030529,intracellular ribonucleoprotein complex|GO:0043227,membrane-bounded organelle|GO:0043226,organelle|GO:0016607,nuclear speck|GO:0016604,nuclear body|GO:0031981,nuclear lumen|GO:0005730,nucleolus|GO:0005813,centrosome|GO:0005634,nucleus|GO:00057…	GO:0003714,transcription corepressor activity|GO:0016796,exonuclease activity, active with either ribo- or deoxyribonucleic acids and producing 5'-phosphomonoesters|GO:0003677,DNA binding|GO:0003713,transcription coactivator activity|GO:0004527,exonuclease activity|GO:0016799,hydrolase activity, hydrolyzing N-glycosyl compounds|GO:0016798,hydrolase activity, acting on glycosyl bonds|GO:0003712,tr…	hsa03410,Base excision repair
Q14011	6.86852	2.78	Q14011	CIRBP	GO:0080090,regulation of primary metabolic process|GO:0019222,regulation of metabolic process|GO:0071840,cellular component organization or biogenesis|GO:0010605,negative regulation of macromolecule metabolic process|GO:0010604,positive regulation of macromolecule metabolic process|GO:0010608,posttranscriptional regulation of gene expression|GO:0043043,peptide biosynthetic process|GO:0048518,posi…	GO:0035770,ribonucleoprotein granule|GO:0031974,membrane-enclosed lumen|GO:0043229,intracellular organelle|GO:0043228,non-membrane-bounded organelle|GO:0036464,cytoplasmic ribonucleoprotein granule|GO:0043227,membrane-bounded organelle|GO:0043226,organelle|GO:0005737,cytoplasm|GO:0031981,nuclear lumen|GO:0005634,nucleus|GO:0030529,intracellular ribonucleoprotein complex|GO:0005654,nucleoplasm|GO:…	GO:0005488,binding|GO:0070181,small ribosomal subunit rRNA binding|GO:0005515,protein binding|GO:0000166,nucleotide binding|GO:0044822,poly(A) RNA binding|GO:0019843,rRNA binding|GO:0036094,small molecule binding|GO:0003723,RNA binding|GO:0003676,nucleic acid binding|GO:0097159,organic cyclic compound binding|GO:0030371,translation repressor activity|GO:0003729,mRNA binding|GO:0045182,translation…
O00154	6.82581	2.771	O00154	ACOT7	GO:0009165,nucleotide biosynthetic process|GO:0044281,small molecule metabolic process|GO:0044282,small molecule catabolic process|GO:0044283,small molecule biosynthetic process|GO:1901362,organic cyclic compound biosynthetic process|GO:0042451,purine nucleoside biosynthetic process|GO:1901360,organic cyclic compound metabolic process|GO:0044712,single-organism catabolic process|GO:0044710,single…	GO:0031974,membrane-enclosed lumen|GO:0043229,intracellular organelle|GO:0043227,membrane-bounded organelle|GO:0043226,organelle|GO:0005737,cytoplasm|GO:0042995,cell projection|GO:0070062,extracellular exosome|GO:0031981,nuclear lumen|GO:0005634,nucleus|GO:0005739,mitochondrion|GO:0031988,membrane-bounded vesicle|GO:0005654,nucleoplasm|GO:0097458,neuron part|GO:0043005,neuron projection|GO:004429…	GO:1901681,sulfur compound binding|GO:0016787,hydrolase activity|GO:0016289,CoA hydrolase activity|GO:0016790,thiolester hydrolase activity|GO:0000062,fatty-acyl-CoA binding|GO:0005488,binding|GO:0016788,hydrolase activity, acting on ester bonds|GO:0036042,long-chain fatty acyl-CoA binding|GO:0050662,coenzyme binding|GO:0003824,catalytic activity|GO:0016290,palmitoyl-CoA hydrolase activity|GO:005…	hsa00062,Fatty acid elongation|hsa01040,Biosynthesis of unsaturated fatty acids
P10599	6.80691	2.767	P10599	TXN	GO:0033157,regulation of intracellular protein transport|GO:0032148,activation of protein kinase B activity|GO:0044238,primary metabolic process|GO:0019220,regulation of phosphate metabolic process|GO:0080090,regulation of primary metabolic process|GO:0019222,regulation of metabolic process|GO:0051049,regulation of transport|GO:0048585,negative regulation of response to stimulus|GO:0048584,positi…	GO:0031974,membrane-enclosed lumen|GO:0043229,intracellular organelle|GO:0043227,membrane-bounded organelle|GO:0043226,organelle|GO:0005737,cytoplasm|GO:0070062,extracellular exosome|GO:0031981,nuclear lumen|GO:0005634,nucleus|GO:0005739,mitochondrion|GO:0031988,membrane-bounded vesicle|GO:0005654,nucleoplasm|GO:1903561,extracellular vesicle|GO:0031982,vesicle|GO:0043230,extracellular organelle|G…	GO:0005488,binding|GO:0003676,nucleic acid binding|GO:0005515,protein binding|GO:0097159,organic cyclic compound binding|GO:0044822,poly(A) RNA binding|GO:0003824,catalytic activity|GO:0016671,oxidoreductase activity, acting on a sulfur group of donors, disulfide as acceptor|GO:0003723,RNA binding|GO:0016667,oxidoreductase activity, acting on a sulfur group of donors|GO:0015036,disulfide oxidored…	hsa05418,Fluid shear stress and atherosclerosis|hsa04621,NOD-like receptor signaling pathway
P47985	6.77396	2.76	P47985	UQCRFS1	GO:1902600,hydrogen ion transmembrane transport|GO:0046677,response to antibiotic|GO:0044281,small molecule metabolic process|GO:0006091,generation of precursor metabolites and energy|GO:0044699,single-organism process|GO:0009719,response to endogenous stimulus|GO:0044710,single-organism metabolic process|GO:0015992,proton transport|GO:0009636,response to toxic substance|GO:0051179,localization|G…	GO:0044464,cell part|GO:1990204,oxidoreductase complex|GO:0043229,intracellular organelle|GO:0070069,cytochrome complex|GO:0043227,membrane-bounded organelle|GO:0043226,organelle|GO:0031224,intrinsic component of membrane|GO:0005737,cytoplasm|GO:0031090,organelle membrane|GO:0098796,membrane protein complex|GO:0043209,myelin sheath|GO:0016021,integral component of membrane|GO:0016020,membrane|GO:…	GO:0008121,ubiquinol-cytochrome-c reductase activity|GO:0044877,macromolecular complex binding|GO:0005488,binding|GO:0016491,oxidoreductase activity|GO:0043169,cation binding|GO:0051540,metal cluster binding|GO:0015077,monovalent inorganic cation transmembrane transporter activity|GO:0043167,ion binding|GO:0032403,protein complex binding|GO:0046872,metal ion binding|GO:0016681,oxidoreductase acti…	hsa00190,Oxidative phosphorylation|hsa04714,Thermogenesis|hsa01100,Metabolic pathways|hsa04260,Cardiac muscle contraction|hsa05012,Parkinson disease|hsa05016,Huntington disease|hsa05010,Alzheimer disease|hsa04932,Non-alcoholic fatty liver disease
P19338	6.7132	2.747	P19338	NCL	GO:0032640,tumor necrosis factor production|GO:0008104,protein localization|GO:0080090,regulation of primary metabolic process|GO:0019222,regulation of metabolic process|GO:0051047,positive regulation of secretion|GO:0051049,regulation of transport|GO:0072359,circulatory system development|GO:0072358,cardiovascular system development|GO:1901362,organic cyclic compound biosynthetic process|GO:0071…	GO:0035770,ribonucleoprotein granule|GO:0031974,membrane-enclosed lumen|GO:0043229,intracellular organelle|GO:0043228,non-membrane-bounded organelle|GO:0036464,cytoplasmic ribonucleoprotein granule|GO:0030529,intracellular ribonucleoprotein complex|GO:0043227,membrane-bounded organelle|GO:0043226,organelle|GO:0005737,cytoplasm|GO:0070062,extracellular exosome|GO:0031981,nuclear lumen|GO:0005730,n…	GO:0008022,protein C-terminus binding|GO:0042393,histone binding|GO:0042134,rRNA primary transcript binding|GO:0050840,extracellular matrix binding|GO:1990631,ErbB-4 class receptor binding|GO:0043169,cation binding|GO:0005488,binding|GO:0003676,nucleic acid binding|GO:0003677,DNA binding|GO:0000166,nucleotide binding|GO:1901363,heterocyclic compound binding|GO:1901265,nucleoside phosphate binding…	hsa05130,Pathogenic Escherichia coli infection
Q9BPU6	6.65298	2.734	Q9BPU6	DPYSL5	GO:0032502,developmental process|GO:0044707,single-multicellular organism process|GO:0008152,metabolic process|GO:0030030,cell projection organization|GO:0030154,cell differentiation|GO:0048468,cell development|GO:0006928,movement of cell or subcellular component|GO:0023052,signaling|GO:0007165,signal transduction|GO:0031175,neuron projection development|GO:0007411,axon guidance|GO:0032989,cellul…	GO:0005737,cytoplasm|GO:0005623,cell|GO:0044464,cell part|GO:0005829,cytosol|GO:0044297,cell body|GO:0030425,dendrite|GO:0005622,intracellular|GO:0097458,neuron part|GO:0044444,cytoplasmic part|GO:0036477,somatodendritic compartment|GO:0043005,neuron projection|GO:0044424,intracellular part|GO:0042995,cell projection|GO:0043025,neuronal cell body|GO:0120038,plasma membrane bounded cell projection…	GO:0016787,hydrolase activity|GO:0015631,tubulin binding|GO:0008092,cytoskeletal protein binding|GO:0016810,hydrolase activity, acting on carbon-nitrogen (but not peptide) bonds|GO:0003824,catalytic activity|GO:0044877,macromolecular complex binding|GO:0005488,binding|GO:0005515,protein binding|GO:0032403,protein complex binding|GO:0008017,microtubule binding|GO:0016812,hydrolase activity, acting…	hsa04360,Axon guidance
P06748	6.60702	2.724	P06748	NPM1	GO:0032069,regulation of nuclease activity|GO:0051169,nuclear transport|GO:0043549,regulation of kinase activity|GO:0019220,regulation of phosphate metabolic process|GO:0080090,regulation of primary metabolic process|GO:0019222,regulation of metabolic process|GO:0048583,regulation of response to stimulus|GO:0008104,protein localization|GO:0031055,chromatin remodeling at centromere|GO:0007165,sign…	GO:0031974,membrane-enclosed lumen|GO:0043229,intracellular organelle|GO:0043228,non-membrane-bounded organelle|GO:0031616,spindle pole centrosome|GO:0005924,cell-substrate adherens junction|GO:0005815,microtubule organizing center|GO:0043227,membrane-bounded organelle|GO:0043226,organelle|GO:0030054,cell junction|GO:0030055,cell-substrate junction|GO:0005856,cytoskeleton|GO:0005819,spindle|GO:00…	GO:0042393,histone binding|GO:0019207,kinase regulator activity|GO:0019899,enzyme binding|GO:0044877,macromolecular complex binding|GO:0005488,binding|GO:0003676,nucleic acid binding|GO:0004857,enzyme inhibitor activity|GO:0098772,molecular function regulator|GO:1901363,heterocyclic compound binding|GO:0030957,Tat protein binding|GO:0003713,transcription coactivator activity|GO:0003712,transcript…
P61978	6.57049	2.716	P61978	HNRNPK	GO:0080090,regulation of primary metabolic process|GO:0019222,regulation of metabolic process|GO:0051049,regulation of transport|GO:0007165,signal transduction|GO:0048260,positive regulation of receptor-mediated endocytosis|GO:1901362,organic cyclic compound biosynthetic process|GO:0071840,cellular component organization or biogenesis|GO:0051716,cellular response to stimulus|GO:0010604,positive r…	GO:0042995,cell projection|GO:0015629,actin cytoskeleton|GO:0005924,cell-substrate adherens junction|GO:0031974,membrane-enclosed lumen|GO:0043229,intracellular organelle|GO:0043228,non-membrane-bounded organelle|GO:0000785,chromatin|GO:0000228,nuclear chromosome|GO:0005925,focal adhesion|GO:0043227,membrane-bounded organelle|GO:0043226,organelle|GO:0030054,cell junction|GO:0030055,cell-substrate…	GO:0001012,RNA polymerase II regulatory region DNA binding|GO:0001159,core promoter proximal region DNA binding|GO:0001077,transcriptional activator activity, RNA polymerase II core promoter proximal region sequence-specific binding|GO:0005488,binding|GO:0003676,nucleic acid binding|GO:0003677,DNA binding|GO:1901363,heterocyclic compound binding|GO:0043565,sequence-specific DNA binding|GO:0043566…	hsa05206,MicroRNAs in cancer|hsa03040,Spliceosome|hsa05203,Viral carcinogenesis
Q92769	6.42635	2.684	Q92769	HDAC2	GO:0007599,hemostasis|GO:0034605,cellular response to heat|GO:0007596,blood coagulation|GO:0016358,dendrite development|GO:2000736,regulation of stem cell differentiation|GO:0098773,skin epidermis development|GO:0070933,histone H4 deacetylation|GO:0070932,histone H3 deacetylation|GO:0051716,cellular response to stimulus|GO:0014031,mesenchymal cell development|GO:0043207,response to external bioti…	GO:0031974,membrane-enclosed lumen|GO:0043229,intracellular organelle|GO:0043228,non-membrane-bounded organelle|GO:0000785,chromatin|GO:0005623,cell|GO:0000228,nuclear chromosome|GO:0043227,membrane-bounded organelle|GO:0043226,organelle|GO:0034708,methyltransferase complex|GO:0005737,cytoplasm|GO:0070822,Sin3-type complex|GO:0070603,SWI/SNF superfamily-type complex|GO:0031519,PcG protein complex…	GO:0032041,NAD-dependent histone deacetylase activity (H3-K14 specific)|GO:0031078,histone deacetylase activity (H3-K14 specific)|GO:0031072,heat shock protein binding|GO:0001012,RNA polymerase II regulatory region DNA binding|GO:0019899,enzyme binding|GO:0001159,core promoter proximal region DNA binding|GO:0001158,enhancer sequence-specific DNA binding|GO:0031491,nucleosome binding|GO:0031490,ch…	hsa04110,Cell cycle|hsa05206,MicroRNAs in cancer|hsa05200,Pathways in cancer|hsa05203,Viral carcinogenesis|hsa05202,Transcriptional misregulation in cancer|hsa04330,Notch signaling pathway|hsa05169,Epstein-Barr virus infection|hsa05034,Alcoholism|hsa05220,Chronic myeloid leukemia|hsa05165,Human papillomavirus infection|hsa05016,Huntington disease|hsa04919,Thyroid hormone signaling pathway|hsa0421…		D00304,Divalproex sodium (USP); Valproate semisodium (INN); Depakote (TN)|D00399,Valproic acid (USP); Depakene (TN)|D00710,Sodium valproate (JP16); Valproate sodium (USAN); Depakene (TN); Selenica (TN)|D06320,Vorinostat (JAN/USAN); Zolinza (TN)|D06637,Romidepsin (JAN/USAN/INN); Istodax (TN)|D08667,Calcium valproate; Valproic acid calcium salt; Convulsofin (TN)|D08870,Belinostat (USAN/INN); Beleod…
Q9UKM9	6.35548	2.668	Q9UKM9	RALY	GO:0090304,nucleic acid metabolic process|GO:0034641,cellular nitrogen compound metabolic process|GO:0006807,nitrogen compound metabolic process|GO:0044237,cellular metabolic process|GO:1901360,organic cyclic compound metabolic process|GO:0006139,nucleobase-containing compound metabolic process|GO:0044260,cellular macromolecule metabolic process|GO:0071704,organic substance metabolic process|GO:0…	GO:0005622,intracellular|GO:0032991,macromolecular complex|GO:0043231,intracellular membrane-bounded organelle|GO:0071013,catalytic step 2 spliceosome|GO:0044464,cell part|GO:0005623,cell|GO:0043226,organelle|GO:0044446,intracellular organelle part|GO:0043229,intracellular organelle|GO:0044428,nuclear part|GO:0044422,organelle part|GO:0044424,intracellular part|GO:0030529,intracellular ribonucleo…	GO:0005515,protein binding|GO:0097159,organic cyclic compound binding|GO:0044822,poly(A) RNA binding|GO:0000166,nucleotide binding|GO:0036094,small molecule binding|GO:0003723,RNA binding|GO:0003676,nucleic acid binding|GO:1901363,heterocyclic compound binding|GO:1901265,nucleoside phosphate binding|GO:0005488,binding|GO:0000989,transcription factor activity, transcription factor binding|GO:00037…
Q3MHD2	6.28102	2.651	Q3MHD2	LSM12	GO:0016070,RNA metabolic process|GO:0006139,nucleobase-containing compound metabolic process|GO:0044238,primary metabolic process|GO:0009987,cellular process|GO:0006725,cellular aromatic compound metabolic process|GO:0044237,cellular metabolic process|GO:0043170,macromolecule metabolic process|GO:0090304,nucleic acid metabolic process|GO:0071704,organic substance metabolic process|GO:0034641,cell…
O43684	6.19885	2.632	O43684	BUB3	GO:0080090,regulation of primary metabolic process|GO:0032434,regulation of proteasomal ubiquitin-dependent protein catabolic process|GO:0032435,negative regulation of proteasomal ubiquitin-dependent protein catabolic process|GO:0044257,cellular protein catabolic process|GO:0000280,nuclear division|GO:0007165,signal transduction|GO:0010965,regulation of mitotic sister chromatid separation|GO:0071…	GO:0031974,membrane-enclosed lumen|GO:0043229,intracellular organelle|GO:0043228,non-membrane-bounded organelle|GO:0043227,membrane-bounded organelle|GO:0043226,organelle|GO:0005737,cytoplasm|GO:0031981,nuclear lumen|GO:0005634,nucleus|GO:0005654,nucleoplasm|GO:0000776,kinetochore|GO:0005694,chromosome|GO:0000779,condensed chromosome, centromeric region|GO:0000793,condensed chromosome|GO:0000775,…	GO:0005488,binding|GO:0005515,protein binding|GO:0043130,ubiquitin binding|GO:0032182,ubiquitin-like protein binding	hsa04110,Cell cycle|hsa05166,Human T-cell leukemia virus 1 infection
Q5SZK8	6.16457	2.624	Q5SZK8	FREM2	GO:0009653,anatomical structure morphogenesis|GO:0007275,multicellular organism development|GO:0044699,single-organism process|GO:0002009,morphogenesis of an epithelium|GO:0048513,animal organ development|GO:0043583,ear development|GO:0048729,tissue morphogenesis|GO:0022610,biological adhesion|GO:0032502,developmental process|GO:0032501,multicellular organismal process|GO:0098609,cell-cell adhesi…	GO:0031012,extracellular matrix|GO:0071944,cell periphery|GO:0043227,membrane-bounded organelle|GO:0043226,organelle|GO:0031224,intrinsic component of membrane|GO:0070062,extracellular exosome|GO:0016021,integral component of membrane|GO:0016020,membrane|GO:0031988,membrane-bounded vesicle|GO:0005886,plasma membrane|GO:1903561,extracellular vesicle|GO:0031982,vesicle|GO:0005604,basement membrane|…	GO:0043169,cation binding|GO:0043167,ion binding|GO:0005488,binding|GO:0046872,metal ion binding|GO:0005509,calcium ion binding|GO:0005515,protein binding	hsa04512,ECM-receptor interaction
P63162	6.15176	2.621	P63162	SNRPN	GO:0090304,nucleic acid metabolic process|GO:0034641,cellular nitrogen compound metabolic process|GO:0006807,nitrogen compound metabolic process|GO:0044237,cellular metabolic process|GO:1901360,organic cyclic compound metabolic process|GO:0009719,response to endogenous stimulus|GO:0006139,nucleobase-containing compound metabolic process|GO:0044260,cellular macromolecule metabolic process|GO:00717…	GO:0071004,U2-type prespliceosome|GO:0043229,intracellular organelle|GO:0043227,membrane-bounded organelle|GO:0043226,organelle|GO:0005737,cytoplasm|GO:0097525,spliceosomal snRNP complex|GO:0005634,nucleus|GO:0030529,intracellular ribonucleoprotein complex|GO:0046540,U4/U6 x U5 tri-snRNP complex|GO:0071010,prespliceosome|GO:0071013,catalytic step 2 spliceosome|GO:0044424,intracellular part|GO:003…	GO:0003676,nucleic acid binding|GO:0097159,organic cyclic compound binding|GO:0044822,poly(A) RNA binding|GO:0003723,RNA binding|GO:0005515,protein binding|GO:1901363,heterocyclic compound binding|GO:0005488,binding
Q15233	6.05027	2.597	Q15233	NONO	GO:2001234,negative regulation of apoptotic signaling pathway|GO:0080090,regulation of primary metabolic process|GO:0019222,regulation of metabolic process|GO:2001233,regulation of apoptotic signaling pathway|GO:0048585,negative regulation of response to stimulus|GO:2001141,regulation of RNA biosynthetic process|GO:0048583,regulation of response to stimulus|GO:0043523,regulation of neuron apoptot…	GO:0031974,membrane-enclosed lumen|GO:0043229,intracellular organelle|GO:0043228,non-membrane-bounded organelle|GO:0043227,membrane-bounded organelle|GO:0043226,organelle|GO:0034399,nuclear periphery|GO:0016604,nuclear body|GO:0031981,nuclear lumen|GO:0005730,nucleolus|GO:0005634,nucleus|GO:0016020,membrane|GO:0005654,nucleoplasm|GO:0044798,nuclear transcription factor complex|GO:0044451,nucleopl…	GO:0000980,RNA polymerase II distal enhancer sequence-specific DNA binding|GO:0001012,RNA polymerase II regulatory region DNA binding|GO:0001158,enhancer sequence-specific DNA binding|GO:0044877,macromolecular complex binding|GO:0005488,binding|GO:0003676,nucleic acid binding|GO:0003677,DNA binding|GO:1901363,heterocyclic compound binding|GO:1901265,nucleoside phosphate binding|GO:0043565,sequenc…
P07900	6.01265	2.588	P07900	HSP90AA1	GO:0008104,protein localization|GO:0006909,phagocytosis|GO:0019222,regulation of metabolic process|GO:0000086,G2/M transition of mitotic cell cycle|GO:0034605,cellular response to heat|GO:0048584,positive regulation of response to stimulus|GO:0048583,regulation of response to stimulus|GO:0009408,response to heat|GO:0061024,membrane organization|GO:0007008,outer mitochondrial membrane organization…	GO:0098590,plasma membrane region|GO:0044421,extracellular region part|GO:0048770,pigment granule|GO:0031974,membrane-enclosed lumen|GO:0030139,endocytic vesicle|GO:0043229,intracellular organelle|GO:0071944,cell periphery|GO:0060205,cytoplasmic membrane-bounded vesicle lumen|GO:0005622,intracellular|GO:0043227,membrane-bounded organelle|GO:0043226,organelle|GO:0005737,cytoplasm|GO:0044433,cytopl…	GO:0016887,ATPase activity|GO:0035639,purine ribonucleoside triphosphate binding|GO:0019899,enzyme binding|GO:0051020,GTPase binding|GO:0044877,macromolecular complex binding|GO:0005488,binding|GO:0003676,nucleic acid binding|GO:0098772,molecular function regulator|GO:1901363,heterocyclic compound binding|GO:0001883,purine nucleoside binding|GO:0001882,nucleoside binding|GO:0043168,anion binding|…	hsa04659,Th17 cell differentiation|hsa05418,Fluid shear stress and atherosclerosis|hsa04612,Antigen processing and presentation|hsa04621,NOD-like receptor signaling pathway|hsa04657,IL-17 signaling pathway|hsa05200,Pathways in cancer|hsa04141,Protein processing in endoplasmic reticulum|hsa04914,Progesterone-mediated oocyte maturation|hsa04915,Estrogen signaling pathway|hsa05215,Prostate cancer|hs…		D09375,Retaspimycin (USAN/INN)|D09376,Retaspimycin hydrochloride (USAN)|D10126,Ganetespib (USAN)|D10646,Luminespib (USAN/INN)|D10647,Luminespib mesylate (USAN)|D10719,Onalespib (USAN/INN)
P22626	5.95871	2.575	P22626	HNRNPA2B1	GO:0080090,regulation of primary metabolic process|GO:0019222,regulation of metabolic process|GO:0050684,regulation of mRNA processing|GO:0050686,negative regulation of mRNA processing|GO:1901362,organic cyclic compound biosynthetic process|GO:1901360,organic cyclic compound metabolic process|GO:0010605,negative regulation of macromolecule metabolic process|GO:0048519,negative regulation of biolo…	GO:0031974,membrane-enclosed lumen|GO:0043229,intracellular organelle|GO:0043227,membrane-bounded organelle|GO:0043226,organelle|GO:0005737,cytoplasm|GO:0031981,nuclear lumen|GO:0005634,nucleus|GO:0016020,membrane|GO:0030529,intracellular ribonucleoprotein complex|GO:0005654,nucleoplasm|GO:0071013,catalytic step 2 spliceosome|GO:0032991,macromolecular complex|GO:0043231,intracellular membrane-bou…	GO:0036002,pre-mRNA binding|GO:0043566,structure-specific DNA binding|GO:0005515,protein binding|GO:0097157,pre-mRNA intronic binding|GO:0043047,single-stranded telomeric DNA binding|GO:0042162,telomeric DNA binding|GO:0044822,poly(A) RNA binding|GO:1901363,heterocyclic compound binding|GO:0043565,sequence-specific DNA binding|GO:0000166,nucleotide binding|GO:0036094,small molecule binding|GO:000…
P35659	5.95871	2.575	P35659	DEK	GO:0080090,regulation of primary metabolic process|GO:0019222,regulation of metabolic process|GO:0048583,regulation of response to stimulus|GO:0007165,signal transduction|GO:2001032,regulation of double-strand break repair via nonhomologous end joining|GO:1901362,organic cyclic compound biosynthetic process|GO:1901360,organic cyclic compound metabolic process|GO:0044710,single-organism metabolic …	GO:0005737,cytoplasm|GO:0043231,intracellular membrane-bounded organelle|GO:0043232,intracellular non-membrane-bounded organelle|GO:0005634,nucleus|GO:0044464,cell part|GO:0044444,cytoplasmic part|GO:0005623,cell|GO:0005622,intracellular|GO:0044424,intracellular part|GO:0043229,intracellular organelle|GO:0043228,non-membrane-bounded organelle|GO:0043292,contractile fiber|GO:0043227,membrane-bound…	GO:0042393,histone binding|GO:0005515,protein binding|GO:0097159,organic cyclic compound binding|GO:0044822,poly(A) RNA binding|GO:0003723,RNA binding|GO:0003676,nucleic acid binding|GO:0003677,DNA binding|GO:1901363,heterocyclic compound binding|GO:0005488,binding|GO:0003682,chromatin binding
P00558	5.91345	2.564	P00558	PGK1	GO:0009167,purine ribonucleoside monophosphate metabolic process|GO:0061621,canonical glycolysis|GO:0061620,glycolytic process through glucose-6-phosphate|GO:0044281,small molecule metabolic process|GO:0009161,ribonucleoside monophosphate metabolic process|GO:1901360,organic cyclic compound metabolic process|GO:0044712,single-organism catabolic process|GO:0044710,single-organism metabolic process…	GO:0043227,membrane-bounded organelle|GO:0043226,organelle|GO:0005737,cytoplasm|GO:0031982,vesicle|GO:0098805,whole membrane|GO:0016020,membrane|GO:0031988,membrane-bounded vesicle|GO:0098589,membrane region|GO:1903561,extracellular vesicle|GO:0070062,extracellular exosome|GO:0043230,extracellular organelle|GO:0005829,cytosol|GO:0045121,membrane raft|GO:0044464,cell part|GO:0005623,cell|GO:000562…	GO:0035639,purine ribonucleoside triphosphate binding|GO:0005488,binding|GO:0000166,nucleotide binding|GO:1901363,heterocyclic compound binding|GO:1901265,nucleoside phosphate binding|GO:0001882,nucleoside binding|GO:0043168,anion binding|GO:0043167,ion binding|GO:0016740,transferase activity|GO:0001883,purine nucleoside binding|GO:0032549,ribonucleoside binding|GO:0017076,purine nucleotide bindi…	hsa01230,Biosynthesis of amino acids|hsa01200,Carbon metabolism|hsa01100,Metabolic pathways|hsa00010,Glycolysis / Gluconeogenesis|hsa04066,HIF-1 signaling pathway
P53007	5.90935	2.563	P53007	SLC25A1	GO:0006842,tricarboxylic acid transport|GO:0009108,coenzyme biosynthetic process|GO:0006637,acyl-CoA metabolic process|GO:0006732,coenzyme metabolic process|GO:0046364,monosaccharide biosynthetic process|GO:0006639,acylglycerol metabolic process|GO:0006638,neutral lipid metabolic process|GO:0046949,fatty-acyl-CoA biosynthetic process|GO:0044249,cellular biosynthetic process|GO:0006820,anion trans…	GO:0044421,extracellular region part|GO:0044464,cell part|GO:0031975,envelope|GO:0043229,intracellular organelle|GO:0043227,membrane-bounded organelle|GO:0043226,organelle|GO:0031224,intrinsic component of membrane|GO:0005737,cytoplasm|GO:0031090,organelle membrane|GO:0016021,integral component of membrane|GO:0016020,membrane|GO:0044444,cytoplasmic part|GO:0005739,mitochondrion|GO:0031988,membran…	GO:0022891,substrate-specific transmembrane transporter activity|GO:0022892,substrate-specific transporter activity|GO:0005342,organic acid transmembrane transporter activity|GO:0008514,organic anion transmembrane transporter activity|GO:0005215,transporter activity|GO:0008509,anion transmembrane transporter activity|GO:0015137,citrate transmembrane transporter activity|GO:0015075,ion transmembra…
P16949	5.88483	2.557	P16949	STMN1	GO:0031110,regulation of microtubule polymerization or depolymerization|GO:0031111,negative regulation of microtubule polymerization or depolymerization|GO:0031113,regulation of microtubule polymerization|GO:0031115,negative regulation of microtubule polymerization|GO:0048468,cell development|GO:0060322,head development|GO:0007165,signal transduction|GO:0071840,cellular component organization or …	GO:0043229,intracellular organelle|GO:0043228,non-membrane-bounded organelle|GO:0005874,microtubule|GO:0043226,organelle|GO:0005856,cytoskeleton|GO:1903561,extracellular vesicle|GO:0031982,vesicle|GO:0043227,membrane-bounded organelle|GO:0016020,membrane|GO:0031988,membrane-bounded vesicle|GO:0097458,neuron part|GO:0044430,cytoskeletal part|GO:0043005,neuron projection|GO:0005737,cytoplasm|GO:001…	GO:0015631,tubulin binding|GO:0004871,signal transducer activity|GO:0008092,cytoskeletal protein binding|GO:0060089,molecular transducer activity|GO:0005488,binding|GO:0005515,protein binding	hsa05206,MicroRNAs in cancer|hsa04010,MAPK signaling pathway
O43390	5.86853	2.553	O43390	HNRNPR	GO:0090304,nucleic acid metabolic process|GO:0034641,cellular nitrogen compound metabolic process|GO:0006807,nitrogen compound metabolic process|GO:0044237,cellular metabolic process|GO:1901360,organic cyclic compound metabolic process|GO:0006139,nucleobase-containing compound metabolic process|GO:0044260,cellular macromolecule metabolic process|GO:0071704,organic substance metabolic process|GO:0…	GO:0031974,membrane-enclosed lumen|GO:0043229,intracellular organelle|GO:0043228,non-membrane-bounded organelle|GO:0043227,membrane-bounded organelle|GO:0043226,organelle|GO:0005737,cytoplasm|GO:0031981,nuclear lumen|GO:0005730,nucleolus|GO:0005634,nucleus|GO:0030529,intracellular ribonucleoprotein complex|GO:0005654,nucleoplasm|GO:0071013,catalytic step 2 spliceosome|GO:0032991,macromolecular co…	GO:0005515,protein binding|GO:0097159,organic cyclic compound binding|GO:0044822,poly(A) RNA binding|GO:0000166,nucleotide binding|GO:0036094,small molecule binding|GO:0003723,RNA binding|GO:0003676,nucleic acid binding|GO:1901363,heterocyclic compound binding|GO:1901265,nucleoside phosphate binding|GO:0005488,binding|GO:0003729,mRNA binding|GO:0003730,mRNA 3'-UTR binding
P22087	5.828	2.543	P22087	FBL	GO:0006479,protein methylation|GO:0033967,box C/D snoRNA metabolic process|GO:0044238,primary metabolic process|GO:0008152,metabolic process|GO:0043933,macromolecular complex subunit organization|GO:0030154,cell differentiation|GO:0010467,gene expression|GO:0009451,RNA modification|GO:0090304,nucleic acid metabolic process|GO:0034641,cellular nitrogen compound metabolic process|GO:0001503,ossific…	GO:0032040,small-subunit processome|GO:0005732,small nucleolar ribonucleoprotein complex|GO:0031974,membrane-enclosed lumen|GO:0030684,preribosome|GO:0043229,intracellular organelle|GO:0043228,non-membrane-bounded organelle|GO:0030529,intracellular ribonucleoprotein complex|GO:0043227,membrane-bounded organelle|GO:0043226,organelle|GO:0016604,nuclear body|GO:0070062,extracellular exosome|GO:00319…	GO:0042054,histone methyltransferase activity|GO:0008649,rRNA methyltransferase activity|GO:0005515,protein binding|GO:0003824,catalytic activity|GO:1990259,histone-glutamine methyltransferase activity|GO:0036009,protein-glutamine N-methyltransferase activity|GO:0016740,transferase activity|GO:0016741,transferase activity, transferring one-carbon groups|GO:1901363,heterocyclic compound binding|GO…	hsa03008,Ribosome biogenesis in eukaryotes
P09429	5.73582	2.52	P09429	HMGB1	GO:0042221,response to chemical|GO:0006909,phagocytosis|GO:0080090,regulation of primary metabolic process|GO:0019222,regulation of metabolic process|GO:0033151,V(D)J recombination|GO:0051049,regulation of transport|GO:0043277,apoptotic cell clearance|GO:0048468,cell development|GO:0043933,macromolecular complex subunit organization|GO:0006325,chromatin organization|GO:0002437,inflammatory respon…	GO:0031974,membrane-enclosed lumen|GO:0043229,intracellular organelle|GO:0043228,non-membrane-bounded organelle|GO:0043227,membrane-bounded organelle|GO:0043226,organelle|GO:0005615,extracellular space|GO:0031981,nuclear lumen|GO:0005634,nucleus|GO:0005654,nucleoplasm|GO:0005694,chromosome|GO:0017053,transcriptional repressor complex|GO:0009986,cell surface|GO:0000793,condensed chromosome|GO:0043…	GO:0042056,chemoattractant activity|GO:0005125,cytokine activity|GO:0050786,RAGE receptor binding|GO:0044877,macromolecular complex binding|GO:0005488,binding|GO:0003676,nucleic acid binding|GO:0003677,DNA binding|GO:1901363,heterocyclic compound binding|GO:0070491,repressing transcription factor binding|GO:0043566,structure-specific DNA binding|GO:0097100,supercoiled DNA binding|GO:0003690,doubl…	hsa04140,Autophagy - animal|hsa03410,Base excision repair|hsa04217,Necroptosis
Q969H8	5.61	2.488	Q969H8	MYDGF	GO:0044238,primary metabolic process|GO:0019220,regulation of phosphate metabolic process|GO:0080090,regulation of primary metabolic process|GO:0019222,regulation of metabolic process|GO:0009636,response to toxic substance|GO:0048584,positive regulation of response to stimulus|GO:0048583,regulation of response to stimulus|GO:0072359,circulatory system development|GO:0072358,cardiovascular system …	GO:0005783,endoplasmic reticulum|GO:0031974,membrane-enclosed lumen|GO:0043229,intracellular organelle|GO:0043227,membrane-bounded organelle|GO:0043226,organelle|GO:0005737,cytoplasm|GO:0070062,extracellular exosome|GO:0005615,extracellular space|GO:0031988,membrane-bounded vesicle|GO:0044432,endoplasmic reticulum part|GO:0005793,endoplasmic reticulum-Golgi intermediate compartment|GO:0005788,end…	GO:0005488,binding|GO:0005515,protein binding
P09874	5.54812	2.472	P09874	PARP1	GO:0033157,regulation of intracellular protein transport|GO:0051169,nuclear transport|GO:0044238,primary metabolic process|GO:0032388,positive regulation of intracellular transport|GO:0080090,regulation of primary metabolic process|GO:0019222,regulation of metabolic process|GO:0060249,anatomical structure homeostasis|GO:0006471,protein ADP-ribosylation|GO:0051049,regulation of transport|GO:003238…	GO:0016020,membrane|GO:0031974,membrane-enclosed lumen|GO:0031975,envelope|GO:0043229,intracellular organelle|GO:0043228,non-membrane-bounded organelle|GO:0043227,membrane-bounded organelle|GO:0043226,organelle|GO:0005737,cytoplasm|GO:0031981,nuclear lumen|GO:0005730,nucleolus|GO:0005634,nucleus|GO:0005635,nuclear envelope|GO:0005739,mitochondrion|GO:0005654,nucleoplasm|GO:0031967,organelle envel…	GO:0019901,protein kinase binding|GO:0051287,NAD binding|GO:0019899,enzyme binding|GO:0044877,macromolecular complex binding|GO:0008270,zinc ion binding|GO:0003676,nucleic acid binding|GO:0003677,DNA binding|GO:0003950,NAD+ ADP-ribosyltransferase activity|GO:0000166,nucleotide binding|GO:1901363,heterocyclic compound binding|GO:1901265,nucleoside phosphate binding|GO:0043169,cation binding|GO:004…	hsa04210,Apoptosis|hsa03410,Base excision repair|hsa04064,NF-kappa B signaling pathway|hsa04217,Necroptosis		D09692,Veliparib (USAN/INN)|D09730,Olaparib (JAN/INN)|D09913,Iniparib (USAN/INN)|D10079,Rucaparib (USAN)|D10140,Niraparib (USAN)|D10157,Rucaparib phosphate (USAN)|D10732,Talazoparib (USAN/INN)|D10733,Talazoparib tosylate (USAN)
B3KNU0	5.54812	2.472	B3KNU0	B3KNU0
Q7Z4W1	5.5098	2.462	Q7Z4W1	DCXR	GO:0019321,pentose metabolic process|GO:0006739,NADP metabolic process|GO:0051289,protein homotetramerization|GO:0043933,macromolecular complex subunit organization|GO:0006733,oxidoreduction coenzyme metabolic process|GO:0006807,nitrogen compound metabolic process|GO:0034641,cellular nitrogen compound metabolic process|GO:0022607,cellular component assembly|GO:1901360,organic cyclic compound meta…	GO:0043229,intracellular organelle|GO:0043228,non-membrane-bounded organelle|GO:0005874,microtubule|GO:0043226,organelle|GO:0005856,cytoskeleton|GO:0042995,cell projection|GO:0031982,vesicle|GO:0043227,membrane-bounded organelle|GO:0005634,nucleus|GO:0016020,membrane|GO:0031988,membrane-bounded vesicle|GO:0044430,cytoskeletal part|GO:0005576,extracellular region|GO:0005737,cytoplasm|GO:0015630,mi…	GO:0016614,oxidoreductase activity, acting on CH-OH group of donors|GO:0016616,oxidoreductase activity, acting on the CH-OH group of donors, NAD or NADP as acceptor|GO:0003824,catalytic activity|GO:0016655,oxidoreductase activity, acting on NAD(P)H, quinone or similar compound as acceptor|GO:0050038,L-xylulose reductase (NADP+) activity|GO:0016651,oxidoreductase activity, acting on NAD(P)H|GO:001…	hsa01100,Metabolic pathways|hsa00040,Pentose and glucuronate interconversions
Q8TC12	5.48313	2.455	Q8TC12	RDH11	GO:0009628,response to abiotic stimulus|GO:0071482,cellular response to light stimulus|GO:0009314,response to radiation|GO:0048583,regulation of response to stimulus|GO:0023052,signaling|GO:0007165,signal transduction|GO:0023051,regulation of signaling|GO:0042572,retinol metabolic process|GO:0010646,regulation of cell communication|GO:0042574,retinal metabolic process|GO:0001523,retinoid metaboli…	GO:0005783,endoplasmic reticulum|GO:0005789,endoplasmic reticulum membrane|GO:0042175,nuclear outer membrane-endoplasmic reticulum membrane network|GO:0043229,intracellular organelle|GO:0043227,membrane-bounded organelle|GO:0043226,organelle|GO:0031224,intrinsic component of membrane|GO:0005737,cytoplasm|GO:0031090,organelle membrane|GO:0097458,neuron part|GO:0016021,integral component of membran…	GO:0004033,aldo-keto reductase (NADP) activity|GO:0008106,alcohol dehydrogenase (NADP+) activity|GO:0016614,oxidoreductase activity, acting on CH-OH group of donors|GO:0016616,oxidoreductase activity, acting on the CH-OH group of donors, NAD or NADP as acceptor|GO:0052650,NADP-retinol dehydrogenase activity|GO:0003824,catalytic activity|GO:0004745,retinol dehydrogenase activity|GO:0016491,oxidore…	hsa00830,Retinol metabolism|hsa01100,Metabolic pathways
Q99729	5.41139	2.436	Q99729	HNRNPAB	GO:0080090,regulation of primary metabolic process|GO:0019222,regulation of metabolic process|GO:0048468,cell development|GO:1901362,organic cyclic compound biosynthetic process|GO:0071840,cellular component organization or biogenesis|GO:0048863,stem cell differentiation|GO:0048864,stem cell development|GO:0010604,positive regulation of macromolecule metabolic process|GO:0048869,cellular developm…	GO:0031974,membrane-enclosed lumen|GO:0043229,intracellular organelle|GO:0043227,membrane-bounded organelle|GO:0043226,organelle|GO:0005737,cytoplasm|GO:0031981,nuclear lumen|GO:0005634,nucleus|GO:0030529,intracellular ribonucleoprotein complex|GO:0005654,nucleoplasm|GO:0044798,nuclear transcription factor complex|GO:0043234,protein complex|GO:0032991,macromolecular complex|GO:0043231,intracellul…	GO:0005488,binding|GO:0043565,sequence-specific DNA binding|GO:0003700,transcription factor activity, sequence-specific DNA binding|GO:0097159,organic cyclic compound binding|GO:0044822,poly(A) RNA binding|GO:0001071,nucleic acid binding transcription factor activity|GO:0000166,nucleotide binding|GO:0036094,small molecule binding|GO:0003723,RNA binding|GO:0003676,nucleic acid binding|GO:0003677,D…
P12236	5.3852	2.429	P12236	SLC25A6	GO:0090087,regulation of peptide transport|GO:0008104,protein localization|GO:0052553,modulation by symbiont of host immune response|GO:0052552,modulation by organism of immune response of other organism involved in symbiotic interaction|GO:0051046,regulation of secretion|GO:0051049,regulation of transport|GO:0048584,positive regulation of response to stimulus|GO:0048583,regulation of response to…	GO:0044464,cell part|GO:0031975,envelope|GO:0043229,intracellular organelle|GO:0043227,membrane-bounded organelle|GO:0043226,organelle|GO:0031224,intrinsic component of membrane|GO:0005737,cytoplasm|GO:0031090,organelle membrane|GO:0005743,mitochondrial inner membrane|GO:0016021,integral component of membrane|GO:0016020,membrane|GO:0044444,cytoplasmic part|GO:0005739,mitochondrion|GO:0098800,inne…	GO:0005346,purine ribonucleotide transmembrane transporter activity|GO:0005347,ATP transmembrane transporter activity|GO:0015932,nucleobase-containing compound transmembrane transporter activity|GO:0015605,organophosphate ester transmembrane transporter activity|GO:0005488,binding|GO:0015291,secondary active transmembrane transporter activity|GO:0015215,nucleotide transmembrane transporter activi…	hsa04022,cGMP-PKG signaling pathway|hsa04020,Calcium signaling pathway|hsa04218,Cellular senescence|hsa04217,Necroptosis|hsa05164,Influenza A|hsa05016,Huntington disease|hsa05166,Human T-cell leukemia virus 1 infection|hsa05012,Parkinson disease
Q9P0M6	5.3295	2.414	Q9P0M6	H2AFY2	GO:0008104,protein localization|GO:0080090,regulation of primary metabolic process|GO:0019222,regulation of metabolic process|GO:0060322,head development|GO:1901362,organic cyclic compound biosynthetic process|GO:0071840,cellular component organization or biogenesis|GO:0010605,negative regulation of macromolecule metabolic process|GO:0071704,organic substance metabolic process|GO:0048869,cellular…	GO:0031974,membrane-enclosed lumen|GO:0044815,DNA packaging complex|GO:0043229,intracellular organelle|GO:0043228,non-membrane-bounded organelle|GO:0000785,chromatin|GO:0005623,cell|GO:0000786,nucleosome|GO:0000228,nuclear chromosome|GO:0043227,membrane-bounded organelle|GO:0043226,organelle|GO:0001740,Barr body|GO:0070062,extracellular exosome|GO:0031981,nuclear lumen|GO:0005634,nucleus|GO:00008…	GO:0044212,transcription regulatory region DNA binding|GO:0043566,structure-specific DNA binding|GO:0046982,protein heterodimerization activity|GO:0005515,protein binding|GO:0043565,sequence-specific DNA binding|GO:0001067,regulatory region nucleic acid binding|GO:0003677,DNA binding|GO:0001012,RNA polymerase II regulatory region DNA binding|GO:0031490,chromatin DNA binding|GO:0044877,macromolecu…	hsa05322,Systemic lupus erythematosus|hsa05034,Alcoholism|hsa04217,Necroptosis
P31943	5.30738	2.408	P31943	HNRNPH1	GO:0080090,regulation of primary metabolic process|GO:0019222,regulation of metabolic process|GO:0031323,regulation of cellular metabolic process|GO:0090304,nucleic acid metabolic process|GO:0034641,cellular nitrogen compound metabolic process|GO:0006807,nitrogen compound metabolic process|GO:0044237,cellular metabolic process|GO:0043170,macromolecule metabolic process|GO:0050789,regulation of bi…	GO:0031974,membrane-enclosed lumen|GO:0043229,intracellular organelle|GO:0043227,membrane-bounded organelle|GO:0043226,organelle|GO:0031981,nuclear lumen|GO:0005634,nucleus|GO:0016020,membrane|GO:0030529,intracellular ribonucleoprotein complex|GO:0005654,nucleoplasm|GO:0071013,catalytic step 2 spliceosome|GO:0032991,macromolecular complex|GO:0043231,intracellular membrane-bounded organelle|GO:004…	GO:0036094,small molecule binding|GO:0005515,protein binding|GO:0097159,organic cyclic compound binding|GO:0044822,poly(A) RNA binding|GO:0000166,nucleotide binding|GO:0008266,poly(U) RNA binding|GO:0003727,single-stranded RNA binding|GO:0003723,RNA binding|GO:0003676,nucleic acid binding|GO:0008187,poly-pyrimidine tract binding|GO:1901363,heterocyclic compound binding|GO:1901265,nucleoside phosp…
Q9Y230	5.27803	2.4	Q9Y230	RUVBL2	GO:0008104,protein localization|GO:0035065,regulation of histone acetylation|GO:0035066,positive regulation of histone acetylation|GO:0090579,dsDNA loop formation|GO:0006475,internal protein amino acid acetylation|GO:0031056,regulation of histone modification|GO:0031058,positive regulation of histone modification|GO:1901362,organic cyclic compound biosynthetic process|GO:0071840,cellular componen…	GO:0043231,intracellular membrane-bounded organelle|GO:0033202,DNA helicase complex|GO:0016020,membrane|GO:0031011,Ino80 complex|GO:0031974,membrane-enclosed lumen|GO:0043229,intracellular organelle|GO:0043228,non-membrane-bounded organelle|GO:0000785,chromatin|GO:0035267,NuA4 histone acetyltransferase complex|GO:0032991,macromolecular complex|GO:1902562,H4 histone acetyltransferase complex|GO:00…	GO:0017076,purine nucleotide binding|GO:0003676,nucleic acid binding|GO:0008026,ATP-dependent helicase activity|GO:0035639,purine ribonucleoside triphosphate binding|GO:0001012,RNA polymerase II regulatory region DNA binding|GO:0001158,enhancer sequence-specific DNA binding|GO:0031490,chromatin DNA binding|GO:0044877,macromolecular complex binding|GO:0005488,binding|GO:0016887,ATPase activity|GO:…
Q9Y2B0	5.21259	2.382	Q9Y2B0	CNPY2	GO:0009892,negative regulation of metabolic process|GO:0009893,positive regulation of metabolic process|GO:0019222,regulation of metabolic process|GO:0009891,positive regulation of biosynthetic process|GO:0031325,positive regulation of cellular metabolic process|GO:0031323,regulation of cellular metabolic process|GO:0010869,regulation of receptor biosynthetic process|GO:0010629,negative regulatio…	GO:0005783,endoplasmic reticulum|GO:0043229,intracellular organelle|GO:0071944,cell periphery|GO:0031226,intrinsic component of plasma membrane|GO:0043226,organelle|GO:0031224,intrinsic component of membrane|GO:0005737,cytoplasm|GO:0043227,membrane-bounded organelle|GO:0016021,integral component of membrane|GO:0016020,membrane|GO:0044459,plasma membrane part|GO:0012505,endomembrane system|GO:0005…	GO:0005488,binding|GO:0005515,protein binding
O43175	5.16583	2.369	O43175	PHGDH	GO:0019222,regulation of metabolic process|GO:0048468,cell development|GO:0021510,spinal cord development|GO:0060322,head development|GO:0044281,small molecule metabolic process|GO:0044283,small molecule biosynthetic process|GO:0071840,cellular component organization or biogenesis|GO:0044710,single-organism metabolic process|GO:0044711,single-organism biosynthetic process|GO:0006544,glycine metab…	GO:0005737,cytoplasm|GO:0005622,intracellular|GO:0043230,extracellular organelle|GO:0031982,vesicle|GO:0043209,myelin sheath|GO:0043227,membrane-bounded organelle|GO:0005829,cytosol|GO:0044464,cell part|GO:0005623,cell|GO:0031988,membrane-bounded vesicle|GO:0044421,extracellular region part|GO:0044444,cytoplasmic part|GO:0005576,extracellular region|GO:0044424,intracellular part|GO:1903561,extrac…	GO:0050662,coenzyme binding|GO:0016614,oxidoreductase activity, acting on CH-OH group of donors|GO:0016616,oxidoreductase activity, acting on the CH-OH group of donors, NAD or NADP as acceptor|GO:0051287,NAD binding|GO:0000166,nucleotide binding|GO:0036094,small molecule binding|GO:0003824,catalytic activity|GO:0004617,phosphoglycerate dehydrogenase activity|GO:0005488,binding|GO:0097159,organic …	hsa00260,Glycine, serine and threonine metabolism|hsa01200,Carbon metabolism|hsa01100,Metabolic pathways|hsa00270,Cysteine and methionine metabolism|hsa01230,Biosynthesis of amino acids
Q99958	5.16583	2.369	Q99958	FOXC2	GO:0001501,skeletal system development|GO:0001503,ossification|GO:0003151,outflow tract morphogenesis|GO:0014033,neural crest cell differentiation|GO:0051716,cellular response to stimulus|GO:0014031,mesenchymal cell development|GO:0048589,developmental growth|GO:0003158,endothelium development|GO:0030855,epithelial cell differentiation|GO:0060548,negative regulation of cell death|GO:0006366,trans…	GO:0043231,intracellular membrane-bounded organelle|GO:0005634,nucleus|GO:0044464,cell part|GO:0005623,cell|GO:0005622,intracellular|GO:0043229,intracellular organelle|GO:0044424,intracellular part|GO:0043227,membrane-bounded organelle|GO:0043226,organelle|GO:0044446,intracellular organelle part|GO:0016604,nuclear body|GO:0031981,nuclear lumen|GO:0043233,organelle lumen|GO:0031974,membrane-enclos…	GO:0003705,transcription factor activity, RNA polymerase II distal enhancer sequence-specific binding|GO:0031490,chromatin DNA binding|GO:0001077,transcriptional activator activity, RNA polymerase II core promoter proximal region sequence-specific binding|GO:0044877,macromolecular complex binding|GO:0001071,nucleic acid binding transcription factor activity|GO:0003676,nucleic acid binding|GO:0003…
P42166	5.14083	2.362	P42166	TMPO	GO:0080090,regulation of primary metabolic process|GO:0019222,regulation of metabolic process|GO:0031326,regulation of cellular biosynthetic process|GO:0031323,regulation of cellular metabolic process|GO:0090304,nucleic acid metabolic process|GO:0044249,cellular biosynthetic process|GO:0034641,cellular nitrogen compound metabolic process|GO:0006807,nitrogen compound metabolic process|GO:0034645,c…	GO:0005635,nuclear envelope|GO:0044464,cell part|GO:0031975,envelope|GO:0043229,intracellular organelle|GO:0043228,non-membrane-bounded organelle|GO:0000785,chromatin|GO:0043227,membrane-bounded organelle|GO:0043226,organelle|GO:0031090,organelle membrane|GO:0005637,nuclear inner membrane|GO:0005634,nucleus|GO:0016020,membrane|GO:0005694,chromosome|GO:0031965,nuclear membrane|GO:0031967,organelle…	GO:0003676,nucleic acid binding|GO:0097159,organic cyclic compound binding|GO:0005488,binding|GO:0005515,protein binding|GO:0003677,DNA binding|GO:0005521,lamin binding|GO:1901363,heterocyclic compound binding|GO:0045296,cadherin binding|GO:0050839,cell adhesion molecule binding
P07741	5.11594	2.355	P07741	APRT	GO:0007595,lactation|GO:0007610,behavior|GO:0009167,purine ribonucleoside monophosphate metabolic process|GO:0009165,nucleotide biosynthetic process|GO:0009163,nucleoside biosynthetic process|GO:0009161,ribonucleoside monophosphate metabolic process|GO:1901362,organic cyclic compound biosynthetic process|GO:0042451,purine nucleoside biosynthetic process|GO:0009168,purine ribonucleoside monophosph…	GO:0031974,membrane-enclosed lumen|GO:0043229,intracellular organelle|GO:0043227,membrane-bounded organelle|GO:0043226,organelle|GO:0005737,cytoplasm|GO:0070062,extracellular exosome|GO:0031981,nuclear lumen|GO:0005634,nucleus|GO:0031988,membrane-bounded vesicle|GO:0005654,nucleoplasm|GO:1903561,extracellular vesicle|GO:0031982,vesicle|GO:0043230,extracellular organelle|GO:0043231,intracellular m…	GO:0005488,binding|GO:0043167,ion binding|GO:1901363,heterocyclic compound binding|GO:1901265,nucleoside phosphate binding|GO:0001882,nucleoside binding|GO:0043168,anion binding|GO:0043169,cation binding|GO:0016763,transferase activity, transferring pentosyl groups|GO:0000166,nucleotide binding|GO:0016740,transferase activity|GO:0001883,purine nucleoside binding|GO:0032549,ribonucleoside binding|…	hsa01100,Metabolic pathways|hsa00230,Purine metabolism
P48637	5.10178	2.351	P48637	GSS	GO:0009991,response to extracellular stimulus|GO:0044707,single-multicellular organism process|GO:0010038,response to metal ion|GO:0042398,cellular modified amino acid biosynthetic process|GO:0050896,response to stimulus|GO:0019752,carboxylic acid metabolic process|GO:1901564,organonitrogen compound metabolic process|GO:0006805,xenobiotic metabolic process|GO:0034641,cellular nitrogen compound me…	GO:0005737,cytoplasm|GO:0005622,intracellular|GO:0043230,extracellular organelle|GO:0031982,vesicle|GO:0044421,extracellular region part|GO:0043227,membrane-bounded organelle|GO:0005829,cytosol|GO:0044464,cell part|GO:0005623,cell|GO:0031988,membrane-bounded vesicle|GO:0044444,cytoplasmic part|GO:0005576,extracellular region|GO:0044424,intracellular part|GO:1903561,extracellular vesicle|GO:006501…	GO:0035639,purine ribonucleoside triphosphate binding|GO:0016881,acid-amino acid ligase activity|GO:0005488,binding|GO:0043167,ion binding|GO:0016597,amino acid binding|GO:1901363,heterocyclic compound binding|GO:1901265,nucleoside phosphate binding|GO:0001882,nucleoside binding|GO:1901681,sulfur compound binding|GO:0043169,cation binding|GO:0004363,glutathione synthase activity|GO:0000287,magnes…	hsa01100,Metabolic pathways|hsa00270,Cysteine and methionine metabolism|hsa00480,Glutathione metabolism|hsa04216,Ferroptosis
P49458	5.08413	2.346	P49458	SRP9	GO:0008104,protein localization|GO:0045900,negative regulation of translational elongation|GO:0080090,regulation of primary metabolic process|GO:0019222,regulation of metabolic process|GO:0061024,membrane organization|GO:0071840,cellular component organization or biogenesis|GO:0010605,negative regulation of macromolecule metabolic process|GO:0070727,cellular macromolecule localization|GO:0010608,…	GO:0005786,signal recognition particle, endoplasmic reticulum targeting|GO:0005785,signal recognition particle receptor complex|GO:0005783,endoplasmic reticulum|GO:0044464,cell part|GO:0005789,endoplasmic reticulum membrane|GO:0042175,nuclear outer membrane-endoplasmic reticulum membrane network|GO:0043229,intracellular organelle|GO:0030529,intracellular ribonucleoprotein complex|GO:0043227,membr…	GO:0097159,organic cyclic compound binding|GO:0005047,signal recognition particle binding|GO:0008312,7S RNA binding|GO:0003723,RNA binding|GO:0003676,nucleic acid binding|GO:0043021,ribonucleoprotein complex binding|GO:0044877,macromolecular complex binding|GO:1901363,heterocyclic compound binding|GO:0005488,binding|GO:0005515,protein binding	hsa03060,Protein export
Q9H9B4	5.05251	2.337	Q9H9B4	SFXN1	GO:0050801,ion homeostasis|GO:0030154,cell differentiation|GO:0042592,homeostatic process|GO:0098771,inorganic ion homeostasis|GO:0055072,iron ion homeostasis|GO:0006826,iron ion transport|GO:0055076,transition metal ion homeostasis|GO:0030001,metal ion transport|GO:0007275,multicellular organism development|GO:0044699,single-organism process|GO:0048869,cellular developmental process|GO:0002262,m…	GO:0044464,cell part|GO:0031975,envelope|GO:0043229,intracellular organelle|GO:0043227,membrane-bounded organelle|GO:0043226,organelle|GO:0031224,intrinsic component of membrane|GO:0005737,cytoplasm|GO:0031090,organelle membrane|GO:0016021,integral component of membrane|GO:0016020,membrane|GO:0044444,cytoplasmic part|GO:0005739,mitochondrion|GO:0031967,organelle envelope|GO:0031966,mitochondrial …	GO:0022891,substrate-specific transmembrane transporter activity|GO:0022892,substrate-specific transporter activity|GO:0005215,transporter activity|GO:0015075,ion transmembrane transporter activity|GO:0022857,transmembrane transporter activity|GO:0008324,cation transmembrane transporter activity|GO:0005342,organic acid transmembrane transporter activity|GO:0015318,inorganic solute uptake transmem…
Q00839	5.00372	2.323	Q00839	HNRNPU	GO:0032922,circadian regulation of gene expression|GO:0008152,metabolic process|GO:0019222,regulation of metabolic process|GO:0071704,organic substance metabolic process|GO:0030154,cell differentiation|GO:0090304,nucleic acid metabolic process|GO:0034641,cellular nitrogen compound metabolic process|GO:0001503,ossification|GO:0044237,cellular metabolic process|GO:0070934,CRD-mediated mRNA stabiliz…	GO:0035770,ribonucleoprotein granule|GO:0031974,membrane-enclosed lumen|GO:0043229,intracellular organelle|GO:0043228,non-membrane-bounded organelle|GO:0036464,cytoplasmic ribonucleoprotein granule|GO:0070937,CRD-mediated mRNA stability complex|GO:0043227,membrane-bounded organelle|GO:0043226,organelle|GO:0005737,cytoplasm|GO:0031981,nuclear lumen|GO:0005634,nucleus|GO:0016020,membrane|GO:0030529…	GO:0035639,purine ribonucleoside triphosphate binding|GO:0005488,binding|GO:0003676,nucleic acid binding|GO:0003677,DNA binding|GO:0043167,ion binding|GO:1901363,heterocyclic compound binding|GO:1901265,nucleoside phosphate binding|GO:0001882,nucleoside binding|GO:0043168,anion binding|GO:0000166,nucleotide binding|GO:0001883,purine nucleoside binding|GO:0032549,ribonucleoside binding|GO:0017076,…	hsa03040,Spliceosome
O60869	4.91776	2.298	O60869	EDF1	GO:0080090,regulation of primary metabolic process|GO:0019222,regulation of metabolic process|GO:1901362,organic cyclic compound biosynthetic process|GO:1901360,organic cyclic compound metabolic process|GO:0044710,single-organism metabolic process|GO:0010604,positive regulation of macromolecule metabolic process|GO:0048869,cellular developmental process|GO:0044093,positive regulation of molecular…	GO:0030880,RNA polymerase complex|GO:0044464,cell part|GO:0031974,membrane-enclosed lumen|GO:0090575,RNA polymerase II transcription factor complex|GO:0043228,non-membrane-bounded organelle|GO:0016591,DNA-directed RNA polymerase II, holoenzyme|GO:0043227,membrane-bounded organelle|GO:0043226,organelle|GO:0005737,cytoplasm|GO:0070062,extracellular exosome|GO:0031981,nuclear lumen|GO:0005730,nucleo…	GO:0004402,histone acetyltransferase activity|GO:0005488,binding|GO:0003676,nucleic acid binding|GO:0003677,DNA binding|GO:0008168,methyltransferase activity|GO:1901363,heterocyclic compound binding|GO:0043565,sequence-specific DNA binding|GO:0008080,N-acetyltransferase activity|GO:0003713,transcription coactivator activity|GO:0003712,transcription cofactor activity|GO:0016740,transferase activit…
Q16795	4.91094	2.296	Q16795	NDUFA9	GO:1901004,ubiquinone-6 metabolic process|GO:0051234,establishment of localization|GO:0006732,coenzyme metabolic process|GO:0009141,nucleoside triphosphate metabolic process|GO:0009161,ribonucleoside monophosphate metabolic process|GO:0009144,purine nucleoside triphosphate metabolic process|GO:0009167,purine ribonucleoside monophosphate metabolic process|GO:0034641,cellular nitrogen compound meta…	GO:0098796,membrane protein complex|GO:0044464,cell part|GO:0031974,membrane-enclosed lumen|GO:1990204,oxidoreductase complex|GO:0043229,intracellular organelle|GO:0043227,membrane-bounded organelle|GO:0043226,organelle|GO:0005737,cytoplasm|GO:0031090,organelle membrane|GO:0005743,mitochondrial inner membrane|GO:0005634,nucleus|GO:0016020,membrane|GO:0098803,respiratory chain complex|GO:0044444,c…	GO:0005488,binding|GO:0050662,coenzyme binding|GO:0003824,catalytic activity|GO:0048037,cofactor binding|GO:0008137,NADH dehydrogenase (ubiquinone) activity|GO:0016655,oxidoreductase activity, acting on NAD(P)H, quinone or similar compound as acceptor|GO:0050136,NADH dehydrogenase (quinone) activity|GO:0016651,oxidoreductase activity, acting on NAD(P)H|GO:0005515,protein binding|GO:0032403,protei…	hsa00190,Oxidative phosphorylation|hsa04714,Thermogenesis|hsa01100,Metabolic pathways|hsa04723,Retrograde endocannabinoid signaling|hsa05012,Parkinson disease|hsa05016,Huntington disease|hsa05010,Alzheimer disease|hsa04932,Non-alcoholic fatty liver disease
P00505	4.8804	2.287	P00505	GOT2	GO:0006820,anion transport|GO:0044281,small molecule metabolic process|GO:0044282,small molecule catabolic process|GO:0044283,small molecule biosynthetic process|GO:1901360,organic cyclic compound metabolic process|GO:1901361,organic cyclic compound catabolic process|GO:0044712,single-organism catabolic process|GO:0044710,single-organism metabolic process|GO:0044711,single-organism biosynthetic p…	GO:0044464,cell part|GO:0031974,membrane-enclosed lumen|GO:0031975,envelope|GO:0043229,intracellular organelle|GO:0071944,cell periphery|GO:0043227,membrane-bounded organelle|GO:0043226,organelle|GO:0005737,cytoplasm|GO:0031090,organelle membrane|GO:0005743,mitochondrial inner membrane|GO:0043209,myelin sheath|GO:0016020,membrane|GO:0044444,cytoplasmic part|GO:0005739,mitochondrion|GO:0031988,mem…	GO:0005488,binding|GO:0016212,kynurenine-oxoglutarate transaminase activity|GO:0008483,transaminase activity|GO:0080130,L-phenylalanine:2-oxoglutarate aminotransferase activity|GO:0003676,nucleic acid binding|GO:0016597,amino acid binding|GO:1901363,heterocyclic compound binding|GO:0043168,anion binding|GO:0005543,phospholipid binding|GO:0043167,ion binding|GO:0004069,L-aspartate:2-oxoglutarate a…	hsa04975,Fat digestion and absorption|hsa00330,Arginine and proline metabolism|hsa01200,Carbon metabolism|hsa00400,Phenylalanine, tyrosine and tryptophan biosynthesis|hsa01100,Metabolic pathways|hsa00250,Alanine, aspartate and glutamate metabolism|hsa00220,Arginine biosynthesis|hsa00360,Phenylalanine metabolism|hsa01230,Biosynthesis of amino acids|hsa00270,Cysteine and methionine metabolism|hsa00…
Q99873	4.84333	2.276	Q99873	PRMT1	GO:0006479,protein methylation|GO:0019220,regulation of phosphate metabolic process|GO:0080090,regulation of primary metabolic process|GO:0019222,regulation of metabolic process|GO:0048584,positive regulation of response to stimulus|GO:0048583,regulation of response to stimulus|GO:0032846,positive regulation of homeostatic process|GO:0032844,regulation of homeostatic process|GO:0007165,signal tra…	GO:0005737,cytoplasm|GO:0044446,intracellular organelle part|GO:0005829,cytosol|GO:0043231,intracellular membrane-bounded organelle|GO:0031981,nuclear lumen|GO:0043233,organelle lumen|GO:0005634,nucleus|GO:0044464,cell part|GO:0044444,cytoplasmic part|GO:0031974,membrane-enclosed lumen|GO:0005622,intracellular|GO:0005654,nucleoplasm|GO:0070013,intracellular organelle lumen|GO:0043229,intracellula…	GO:0016274,protein-arginine N-methyltransferase activity|GO:0042054,histone methyltransferase activity|GO:0016273,arginine N-methyltransferase activity|GO:0019899,enzyme binding|GO:0008469,histone-arginine N-methyltransferase activity|GO:0008276,protein methyltransferase activity|GO:0005488,binding|GO:0035242,protein-arginine omega-N asymmetric methyltransferase activity|GO:0008168,methyltransfer…	hsa04922,Glucagon signaling pathway|hsa04068,FoxO signaling pathway
B3KTA3	4.80654	2.265	B3KTA3	B3KTA3	GO:0006996,organelle organization|GO:0007015,actin filament organization|GO:0044699,single-organism process|GO:0007010,cytoskeleton organization|GO:0040011,locomotion|GO:0030029,actin filament-based process|GO:0048870,cell motility|GO:0097435,fibril organization|GO:0009987,cellular process|GO:0030036,actin cytoskeleton organization|GO:0006928,movement of cell or subcellular component|GO:1902589,s…	GO:0005856,cytoskeleton|GO:0005737,cytoplasm|GO:0043232,intracellular non-membrane-bounded organelle|GO:0044464,cell part|GO:0005623,cell|GO:0005622,intracellular|GO:0043229,intracellular organelle|GO:0043228,non-membrane-bounded organelle|GO:0044424,intracellular part|GO:0043226,organelle	GO:0030674,protein binding, bridging|GO:0008092,cytoskeletal protein binding|GO:0051015,actin filament binding|GO:0003779,actin binding|GO:0044877,macromolecular complex binding|GO:0005488,binding|GO:0005515,protein binding|GO:0032403,protein complex binding|GO:0060090,binding, bridging
Q09028	4.74037	2.245	Q09028	RBBP4	GO:0080090,regulation of primary metabolic process|GO:0019222,regulation of metabolic process|GO:0000086,G2/M transition of mitotic cell cycle|GO:0031055,chromatin remodeling at centromere|GO:1901362,organic cyclic compound biosynthetic process|GO:0071840,cellular component organization or biogenesis|GO:0010605,negative regulation of macromolecule metabolic process|GO:0043044,ATP-dependent chroma…	GO:0031010,ISWI-type complex|GO:0031974,membrane-enclosed lumen|GO:0043229,intracellular organelle|GO:0043228,non-membrane-bounded organelle|GO:0000785,chromatin|GO:0005623,cell|GO:0000228,nuclear chromosome|GO:0043227,membrane-bounded organelle|GO:0043226,organelle|GO:0034708,methyltransferase complex|GO:0070822,Sin3-type complex|GO:0070603,SWI/SNF superfamily-type complex|GO:0031519,PcG protein…	GO:0019899,enzyme binding|GO:0042393,histone binding|GO:0003676,nucleic acid binding|GO:0001012,RNA polymerase II regulatory region DNA binding|GO:0001159,core promoter proximal region DNA binding|GO:0001158,enhancer sequence-specific DNA binding|GO:0031491,nucleosome binding|GO:0031490,chromatin DNA binding|GO:0031492,nucleosomal DNA binding|GO:0044877,macromolecular complex binding|GO:0005488,b…	hsa04218,Cellular senescence
P07910	4.71089	2.236	P07910	HNRNPC	GO:0008152,metabolic process|GO:0019222,regulation of metabolic process|GO:0043933,macromolecular complex subunit organization|GO:0030154,cell differentiation|GO:0090304,nucleic acid metabolic process|GO:0034641,cellular nitrogen compound metabolic process|GO:0001503,ossification|GO:1901360,organic cyclic compound metabolic process|GO:0044237,cellular metabolic process|GO:0070935,3'-UTR-mediated …	GO:0031974,membrane-enclosed lumen|GO:0043229,intracellular organelle|GO:0043228,non-membrane-bounded organelle|GO:0000785,chromatin|GO:0000228,nuclear chromosome|GO:0030529,intracellular ribonucleoprotein complex|GO:0043227,membrane-bounded organelle|GO:0043226,organelle|GO:0005737,cytoplasm|GO:0070062,extracellular exosome|GO:0031981,nuclear lumen|GO:0005634,nucleus|GO:0016020,membrane|GO:00319…	GO:1990247,N6-methyladenosine-containing RNA binding|GO:0001012,RNA polymerase II regulatory region DNA binding|GO:0001159,core promoter proximal region DNA binding|GO:0001158,enhancer sequence-specific DNA binding|GO:0031491,nucleosome binding|GO:0031490,chromatin DNA binding|GO:0031492,nucleosomal DNA binding|GO:0044877,macromolecular complex binding|GO:0005488,binding|GO:0003676,nucleic acid b…	hsa03040,Spliceosome
Q15717	4.68159	2.227	Q15717	ELAVL1	GO:2000736,regulation of stem cell differentiation|GO:0080090,regulation of primary metabolic process|GO:0019222,regulation of metabolic process|GO:0048468,cell development|GO:0070935,3'-UTR-mediated mRNA stabilization|GO:0048863,stem cell differentiation|GO:0048864,stem cell development|GO:0010604,positive regulation of macromolecule metabolic process|GO:0010608,posttranscriptional regulation of…	GO:0031974,membrane-enclosed lumen|GO:0043229,intracellular organelle|GO:0043227,membrane-bounded organelle|GO:0043226,organelle|GO:0005737,cytoplasm|GO:0031981,nuclear lumen|GO:0005634,nucleus|GO:0016020,membrane|GO:0005654,nucleoplasm|GO:0043231,intracellular membrane-bounded organelle|GO:0043233,organelle lumen|GO:0005829,cytosol|GO:0044464,cell part|GO:0005623,cell|GO:0005622,intracellular|GO…	GO:0005488,binding|GO:0036094,small molecule binding|GO:0005515,protein binding|GO:0019901,protein kinase binding|GO:0097159,organic cyclic compound binding|GO:0044822,poly(A) RNA binding|GO:0019899,enzyme binding|GO:0000166,nucleotide binding|GO:0017091,AU-rich element binding|GO:0019900,kinase binding|GO:0003725,double-stranded RNA binding|GO:0003730,mRNA 3'-UTR binding|GO:0003676,nucleic acid …	hsa04152,AMPK signaling pathway|hsa04657,IL-17 signaling pathway
Q13263	4.6396	2.214	Q13263	TRIM28	GO:0033157,regulation of intracellular protein transport|GO:0051169,nuclear transport|GO:0008104,protein localization|GO:0032388,positive regulation of intracellular transport|GO:0080090,regulation of primary metabolic process|GO:0019222,regulation of metabolic process|GO:0051049,regulation of transport|GO:0032386,regulation of intracellular transport|GO:0048584,positive regulation of response to…	GO:0031974,membrane-enclosed lumen|GO:0090575,RNA polymerase II transcription factor complex|GO:0043228,non-membrane-bounded organelle|GO:0000785,chromatin|GO:0000228,nuclear chromosome|GO:0043227,membrane-bounded organelle|GO:0043226,organelle|GO:0005719,nuclear euchromatin|GO:0031981,nuclear lumen|GO:0005634,nucleus|GO:0005654,nucleoplasm|GO:0044454,nuclear chromosome part|GO:0044798,nuclear tr…	GO:0044389,ubiquitin-like protein ligase binding|GO:0019899,enzyme binding|GO:0008270,zinc ion binding|GO:0003676,nucleic acid binding|GO:0003677,DNA binding|GO:1901363,heterocyclic compound binding|GO:0019787,ubiquitin-like protein transferase activity|GO:0043565,sequence-specific DNA binding|GO:0046914,transition metal ion binding|GO:0004842,ubiquitin-protein transferase activity|GO:0003714,tra…
Q13151	4.62996	2.211	Q13151	HNRNPA0	GO:0006954,inflammatory response|GO:0008152,metabolic process|GO:0019222,regulation of metabolic process|GO:0090304,nucleic acid metabolic process|GO:0034641,cellular nitrogen compound metabolic process|GO:0006807,nitrogen compound metabolic process|GO:0044237,cellular metabolic process|GO:0070935,3'-UTR-mediated mRNA stabilization|GO:0032496,response to lipopolysaccharide|GO:0043170,macromolecul…	GO:0044446,intracellular organelle part|GO:0032991,macromolecular complex|GO:0043231,intracellular membrane-bounded organelle|GO:0031981,nuclear lumen|GO:0043233,organelle lumen|GO:0005634,nucleus|GO:0044464,cell part|GO:0031974,membrane-enclosed lumen|GO:0030529,intracellular ribonucleoprotein complex|GO:0005654,nucleoplasm|GO:0070013,intracellular organelle lumen|GO:0043229,intracellular organe…	GO:0036094,small molecule binding|GO:0005515,protein binding|GO:0019901,protein kinase binding|GO:0097159,organic cyclic compound binding|GO:0044822,poly(A) RNA binding|GO:0019899,enzyme binding|GO:0000166,nucleotide binding|GO:0017091,AU-rich element binding|GO:0019900,kinase binding|GO:0003723,RNA binding|GO:0003676,nucleic acid binding|GO:1901363,heterocyclic compound binding|GO:1901265,nucleo…
Q02252	4.62355	2.209	Q02252	ALDH6A1	GO:0030154,cell differentiation|GO:0019752,carboxylic acid metabolic process|GO:0009063,cellular amino acid catabolic process|GO:0072529,pyrimidine-containing compound catabolic process|GO:0034641,cellular nitrogen compound metabolic process|GO:0006807,nitrogen compound metabolic process|GO:1901360,organic cyclic compound metabolic process|GO:0044281,small molecule metabolic process|GO:0044282,sm…	GO:0031974,membrane-enclosed lumen|GO:0043229,intracellular organelle|GO:0043227,membrane-bounded organelle|GO:0043226,organelle|GO:0005737,cytoplasm|GO:0070062,extracellular exosome|GO:0031981,nuclear lumen|GO:0005634,nucleus|GO:0005739,mitochondrion|GO:0031988,membrane-bounded vesicle|GO:0005654,nucleoplasm|GO:0005759,mitochondrial matrix|GO:1903561,extracellular vesicle|GO:0031982,vesicle|GO:0…	GO:0004491,methylmalonate-semialdehyde dehydrogenase (acylating) activity|GO:0016790,thiolester hydrolase activity|GO:0005488,binding|GO:0003676,nucleic acid binding|GO:1901363,heterocyclic compound binding|GO:0016491,oxidoreductase activity|GO:1901681,sulfur compound binding|GO:0050662,coenzyme binding|GO:0016620,oxidoreductase activity, acting on the aldehyde or oxo group of donors, NAD or NADP…	hsa00562,Inositol phosphate metabolism|hsa01100,Metabolic pathways|hsa01200,Carbon metabolism|hsa00280,Valine, leucine and isoleucine degradation|hsa00640,Propanoate metabolism|hsa00410,beta-Alanine metabolism
P17612	4.58843	2.198	P17612	PRKACA	GO:0033157,regulation of intracellular protein transport|GO:0051169,nuclear transport|GO:0051168,nuclear export|GO:0007599,hemostasis|GO:0051046,regulation of secretion|GO:0051049,regulation of transport|GO:0007596,blood coagulation|GO:0001503,ossification|GO:0044281,small molecule metabolic process|GO:0034199,activation of protein kinase A activity|GO:0098771,inorganic ion homeostasis|GO:0032388…	GO:0044463,cell projection part|GO:0098590,plasma membrane region|GO:1902911,protein kinase complex|GO:0016021,integral component of membrane|GO:0044421,extracellular region part|GO:0031974,membrane-enclosed lumen|GO:0031594,neuromuscular junction|GO:0043229,intracellular organelle|GO:0043228,non-membrane-bounded organelle|GO:0034702,ion channel complex|GO:0045202,synapse|GO:0005929,cilium|GO:004…	GO:0005488,binding|GO:0044389,ubiquitin-like protein ligase binding|GO:0035639,purine ribonucleoside triphosphate binding|GO:0019899,enzyme binding|GO:0044877,macromolecular complex binding|GO:0004672,protein kinase activity|GO:0004691,cAMP-dependent protein kinase activity|GO:0004690,cyclic nucleotide-dependent protein kinase activity|GO:1901363,heterocyclic compound binding|GO:0001883,purine nu…	hsa05414,Dilated cardiomyopathy|hsa04340,Hedgehog signaling pathway|hsa04611,Platelet activation|hsa04020,Calcium signaling pathway|hsa04740,Olfactory transduction|hsa04024,cAMP signaling pathway|hsa04530,Tight junction|hsa04140,Autophagy - animal|hsa04723,Retrograde endocannabinoid signaling|hsa04725,Cholinergic synapse|hsa04724,Glutamatergic synapse|hsa04727,GABAergic synapse|hsa04726,Serotoner…
Q96FW1	4.53468	2.181	Q96FW1	OTUB1	GO:0080090,regulation of primary metabolic process|GO:0019222,regulation of metabolic process|GO:0048585,negative regulation of response to stimulus|GO:0048583,regulation of response to stimulus|GO:0031057,negative regulation of histone modification|GO:0031056,regulation of histone modification|GO:0071840,cellular component organization or biogenesis|GO:0051716,cellular response to stimulus|GO:00…	GO:0043231,intracellular membrane-bounded organelle|GO:0005737,cytoplasm|GO:0005622,intracellular|GO:0043230,extracellular organelle|GO:0031982,vesicle|GO:0044421,extracellular region part|GO:0043227,membrane-bounded organelle|GO:0005634,nucleus|GO:0044464,cell part|GO:0005623,cell|GO:0031988,membrane-bounded vesicle|GO:0043229,intracellular organelle|GO:0005576,extracellular region|GO:0044424,in…	GO:0016787,hydrolase activity|GO:0019784,NEDD8-specific protease activity|GO:0019783,ubiquitin-like protein-specific protease activity|GO:0032182,ubiquitin-like protein binding|GO:0019899,enzyme binding|GO:0008234,cysteine-type peptidase activity|GO:0003824,catalytic activity|GO:0036459,thiol-dependent ubiquitinyl hydrolase activity|GO:0070011,peptidase activity, acting on L-amino acid peptides|G…
Q14444	4.44752	2.153	Q14444	CAPRIN1	GO:0080090,regulation of primary metabolic process|GO:0019222,regulation of metabolic process|GO:0048468,cell development|GO:0016358,dendrite development|GO:0031344,regulation of cell projection organization|GO:0071840,cellular component organization or biogenesis|GO:0031346,positive regulation of cell projection organization|GO:0097061,dendritic spine organization|GO:0010605,negative regulation …	GO:0035770,ribonucleoprotein granule|GO:0044464,cell part|GO:0030425,dendrite|GO:0043229,intracellular organelle|GO:0043228,non-membrane-bounded organelle|GO:0036464,cytoplasmic ribonucleoprotein granule|GO:0031226,intrinsic component of plasma membrane|GO:0043226,organelle|GO:0031224,intrinsic component of membrane|GO:0005737,cytoplasm|GO:0016021,integral component of membrane|GO:0016020,membran…	GO:0097159,organic cyclic compound binding|GO:0044822,poly(A) RNA binding|GO:0005488,binding|GO:0003676,nucleic acid binding|GO:1901363,heterocyclic compound binding|GO:0003723,RNA binding|GO:0005515,protein binding
P05023	4.44443	2.152	P05023	ATP1A1	GO:0080090,regulation of primary metabolic process|GO:0019222,regulation of metabolic process|GO:0051049,regulation of transport|GO:0055080,cation homeostasis|GO:0003012,muscle system process|GO:0003013,circulatory system process|GO:0055075,potassium ion homeostasis|GO:0045989,positive regulation of striated muscle contraction|GO:0001508,action potential|GO:0060081,membrane hyperpolarization|GO:1…	GO:0098590,plasma membrane region|GO:0044463,cell projection part|GO:0005783,endoplasmic reticulum|GO:0044421,extracellular region part|GO:0048770,pigment granule|GO:0014704,intercalated disc|GO:0005901,caveola|GO:0043229,intracellular organelle|GO:0071944,cell periphery|GO:0045202,synapse|GO:0090533,cation-transporting ATPase complex|GO:0042383,sarcolemma|GO:0044853,plasma membrane raft|GO:00432…	GO:0016791,phosphatase activity|GO:0035639,purine ribonucleoside triphosphate binding|GO:0031420,alkali metal ion binding|GO:0019899,enzyme binding|GO:0042578,phosphoric ester hydrolase activity|GO:0005488,binding|GO:0016887,ATPase activity|GO:0043548,phosphatidylinositol 3-kinase binding|GO:0019901,protein kinase binding|GO:0043167,ion binding|GO:1901363,heterocyclic compound binding|GO:0001883,…	hsa04970,Salivary secretion|hsa04971,Gastric acid secretion|hsa04961,Endocrine and other factor-regulated calcium reabsorption|hsa04960,Aldosterone-regulated sodium reabsorption|hsa04974,Protein digestion and absorption|hsa04976,Bile secretion|hsa04964,Proximal tubule bicarbonate reclamation|hsa04022,cGMP-PKG signaling pathway|hsa04972,Pancreatic secretion|hsa04024,cAMP signaling pathway|hsa04973…		D00112,G-Strophanthin (JAN); Ouabain; Ouabain octahydrate|D00297,Digitoxin (JP16/USP/INN); Crystodigin (TN)|D00298,Digoxin (JP16/USP); Lanoxicaps (TN); Lanoxin (TN)|D01240,Deslanoside (JP16/USP/INN); Cedilanid-d (TN)|D01379,Proscillaridin (JAN/USAN/INN); Talusin (TN)|D01972,Lanatoside C (JP16/INN); Digilanogen C (TN)|D02587,Metildigoxin (JP16); Lanirapid (TN)|D06881,Acetyldigitoxin (INN); Acylani…
P17844	4.42292	2.145	P17844	DDX5	GO:0080090,regulation of primary metabolic process|GO:0019222,regulation of metabolic process|GO:0050684,regulation of mRNA processing|GO:0048584,positive regulation of response to stimulus|GO:0048583,regulation of response to stimulus|GO:0009299,mRNA transcription|GO:0001503,ossification|GO:0007165,signal transduction|GO:1901362,organic cyclic compound biosynthetic process|GO:1901360,organic cyc…	GO:0031974,membrane-enclosed lumen|GO:0043229,intracellular organelle|GO:0043228,non-membrane-bounded organelle|GO:0030529,intracellular ribonucleoprotein complex|GO:0043227,membrane-bounded organelle|GO:0043226,organelle|GO:0070062,extracellular exosome|GO:0031981,nuclear lumen|GO:0005730,nucleolus|GO:0005634,nucleus|GO:0016020,membrane|GO:0031988,membrane-bounded vesicle|GO:0005654,nucleoplasm|…	GO:0016887,ATPase activity|GO:0008026,ATP-dependent helicase activity|GO:0048306,calcium-dependent protein binding|GO:0035639,purine ribonucleoside triphosphate binding|GO:0050681,androgen receptor binding|GO:0019899,enzyme binding|GO:0005488,binding|GO:0003676,nucleic acid binding|GO:0008186,RNA-dependent ATPase activity|GO:0043167,ion binding|GO:1901363,heterocyclic compound binding|GO:0001883,…	hsa05205,Proteoglycans in cancer|hsa03040,Spliceosome|hsa05202,Transcriptional misregulation in cancer
O14828	4.41373	2.142	O14828	SCAMP3	GO:0008104,protein localization|GO:0044699,single-organism process|GO:0033993,response to lipid|GO:0051179,localization|GO:0071702,organic substance transport|GO:0033036,macromolecule localization|GO:0032526,response to retinoic acid|GO:0048193,Golgi vesicle transport|GO:0006810,transport|GO:0045184,establishment of protein localization|GO:0044765,single-organism transport|GO:0001101,response to …	GO:0043229,intracellular organelle|GO:0005622,intracellular|GO:0043227,membrane-bounded organelle|GO:0043226,organelle|GO:0031224,intrinsic component of membrane|GO:0005737,cytoplasm|GO:0031982,vesicle|GO:0016021,integral component of membrane|GO:0016020,membrane|GO:0031988,membrane-bounded vesicle|GO:0044431,Golgi apparatus part|GO:0005794,Golgi apparatus|GO:0098588,bounding membrane of organell…	GO:0031625,ubiquitin protein ligase binding|GO:0044389,ubiquitin-like protein ligase binding|GO:0019899,enzyme binding|GO:0005488,binding|GO:0005515,protein binding
Q9NQW7	4.38933	2.134	Q9NQW7	XPNPEP1	GO:0044238,primary metabolic process|GO:1901575,organic substance catabolic process|GO:1901564,organonitrogen compound metabolic process|GO:1901565,organonitrogen compound catabolic process|GO:0043603,cellular amide metabolic process|GO:0019538,protein metabolic process|GO:0009987,cellular process|GO:0010815,bradykinin catabolic process|GO:0043171,peptide catabolic process|GO:0043170,macromolecul…	GO:0005737,cytoplasm|GO:0005622,intracellular|GO:0043230,extracellular organelle|GO:0031982,vesicle|GO:0044421,extracellular region part|GO:0043227,membrane-bounded organelle|GO:0044464,cell part|GO:0005623,cell|GO:0031988,membrane-bounded vesicle|GO:0005576,extracellular region|GO:0044424,intracellular part|GO:1903561,extracellular vesicle|GO:0065010,extracellular membrane-bounded organelle|GO:0…	GO:0005488,binding|GO:0004177,aminopeptidase activity|GO:0046914,transition metal ion binding|GO:0016787,hydrolase activity|GO:0003824,catalytic activity|GO:0043169,cation binding|GO:0030145,manganese ion binding|GO:0043167,ion binding|GO:0008238,exopeptidase activity|GO:0070011,peptidase activity, acting on L-amino acid peptides|GO:0042802,identical protein binding|GO:0005515,protein binding|GO:…
Q53FS6	4.37111	2.128	Q53FS6	Q53FS6	GO:0006950,response to stress|GO:0009987,cellular process|GO:0006457,protein folding|GO:0050896,response to stimulus		GO:0043168,anion binding|GO:0030554,adenyl nucleotide binding|GO:0035639,purine ribonucleoside triphosphate binding|GO:0097159,organic cyclic compound binding|GO:1901265,nucleoside phosphate binding|GO:0000166,nucleotide binding|GO:0036094,small molecule binding|GO:0097367,carbohydrate derivative binding|GO:0051082,unfolded protein binding|GO:0032559,adenyl ribonucleotide binding|GO:0032553,ribon…
G3XAL0	4.36506	2.126	G3XAL0	MDH2	GO:0019752,carboxylic acid metabolic process|GO:0006099,tricarboxylic acid cycle|GO:0009060,aerobic respiration|GO:0044281,small molecule metabolic process|GO:0006091,generation of precursor metabolites and energy|GO:0072350,tricarboxylic acid metabolic process|GO:0044699,single-organism process|GO:0044710,single-organism metabolic process|GO:0071704,organic substance metabolic process|GO:0044238…	GO:0031974,membrane-enclosed lumen|GO:0043229,intracellular organelle|GO:0071944,cell periphery|GO:0043227,membrane-bounded organelle|GO:0043226,organelle|GO:0005737,cytoplasm|GO:0031981,nuclear lumen|GO:0005634,nucleus|GO:0016020,membrane|GO:0005739,mitochondrion|GO:0005654,nucleoplasm|GO:0005886,plasma membrane|GO:0043231,intracellular membrane-bounded organelle|GO:0043233,organelle lumen|GO:00…	GO:0016614,oxidoreductase activity, acting on CH-OH group of donors|GO:0016615,malate dehydrogenase activity|GO:0016616,oxidoreductase activity, acting on the CH-OH group of donors, NAD or NADP as acceptor|GO:0003824,catalytic activity|GO:0030060,L-malate dehydrogenase activity|GO:0016491,oxidoreductase activity	hsa00620,Pyruvate metabolism|hsa01100,Metabolic pathways|hsa00630,Glyoxylate and dicarboxylate metabolism|hsa01200,Carbon metabolism|hsa00270,Cysteine and methionine metabolism|hsa00020,Citrate cycle (TCA cycle)
A0A384N6A4	4.35297	2.122	P61604	HSPE1	GO:0032502,developmental process|GO:0006457,protein folding|GO:0080090,regulation of primary metabolic process|GO:0019222,regulation of metabolic process|GO:0031325,positive regulation of cellular metabolic process|GO:0030154,cell differentiation|GO:0031323,regulation of cellular metabolic process|GO:2001056,positive regulation of cysteine-type endopeptidase activity|GO:0031638,zymogen activation…	GO:0031974,membrane-enclosed lumen|GO:0043229,intracellular organelle|GO:0043227,membrane-bounded organelle|GO:0043226,organelle|GO:0005737,cytoplasm|GO:0070062,extracellular exosome|GO:0016020,membrane|GO:0005739,mitochondrion|GO:0031988,membrane-bounded vesicle|GO:0005759,mitochondrial matrix|GO:1903561,extracellular vesicle|GO:0031982,vesicle|GO:0043230,extracellular organelle|GO:0043231,intra…	GO:0035639,purine ribonucleoside triphosphate binding|GO:0005488,binding|GO:0003676,nucleic acid binding|GO:0000166,nucleotide binding|GO:1901363,heterocyclic compound binding|GO:1901265,nucleoside phosphate binding|GO:0001882,nucleoside binding|GO:0043168,anion binding|GO:0051087,chaperone binding|GO:0051082,unfolded protein binding|GO:0043167,ion binding|GO:0001883,purine nucleoside binding|GO:…
Q15102	4.29602	2.103	Q15102	PAFAH1B3	GO:0019953,sexual reproduction|GO:0060322,head development|GO:0044707,single-multicellular organism process|GO:0044699,single-organism process|GO:0048609,multicellular organismal reproductive process|GO:0044712,single-organism catabolic process|GO:0044710,single-organism metabolic process|GO:0000003,reproduction|GO:0016042,lipid catabolic process|GO:0071704,organic substance metabolic process|GO:…	GO:0005737,cytoplasm|GO:0005622,intracellular|GO:0043230,extracellular organelle|GO:0031982,vesicle|GO:0044421,extracellular region part|GO:0043227,membrane-bounded organelle|GO:0005829,cytosol|GO:0016020,membrane|GO:0044464,cell part|GO:0005623,cell|GO:0031988,membrane-bounded vesicle|GO:0044444,cytoplasmic part|GO:0005576,extracellular region|GO:0044424,intracellular part|GO:1903561,extracellul…	GO:0016787,hydrolase activity|GO:0016407,acetyltransferase activity|GO:0052689,carboxylic ester hydrolase activity|GO:0016788,hydrolase activity, acting on ester bonds|GO:0003824,catalytic activity|GO:0016740,transferase activity|GO:0003847,1-alkyl-2-acetylglycerophosphocholine esterase activity|GO:0016747,transferase activity, transferring acyl groups other than amino-acyl groups|GO:0005515,prot…	hsa01100,Metabolic pathways|hsa00565,Ether lipid metabolism
P16401	4.29304	2.102	P16401	HIST1H1B	GO:0006479,protein methylation|GO:0034728,nucleosome organization|GO:0008104,protein localization|GO:0080090,regulation of primary metabolic process|GO:0019222,regulation of metabolic process|GO:0031056,regulation of histone modification|GO:0051567,histone H3-K9 methylation|GO:0031058,positive regulation of histone modification|GO:1901362,organic cyclic compound biosynthetic process|GO:0071840,ce…	GO:0031974,membrane-enclosed lumen|GO:0044815,DNA packaging complex|GO:0043229,intracellular organelle|GO:0043228,non-membrane-bounded organelle|GO:0000785,chromatin|GO:0000786,nucleosome|GO:0000228,nuclear chromosome|GO:0043227,membrane-bounded organelle|GO:0043226,organelle|GO:0070062,extracellular exosome|GO:0031981,nuclear lumen|GO:0005634,nucleus|GO:0031988,membrane-bounded vesicle|GO:004445…	GO:0043566,structure-specific DNA binding|GO:0005515,protein binding|GO:0097159,organic cyclic compound binding|GO:0044822,poly(A) RNA binding|GO:0019899,enzyme binding|GO:0031490,chromatin DNA binding|GO:0044877,macromolecular complex binding|GO:0003723,RNA binding|GO:0003676,nucleic acid binding|GO:0003677,DNA binding|GO:0003682,chromatin binding|GO:0042826,histone deacetylase binding|GO:190136…
B4DZ53	4.20469	2.072	B4DZ53	B4DZ53	GO:0044238,primary metabolic process|GO:0005975,carbohydrate metabolic process|GO:0008152,metabolic process|GO:0071704,organic substance metabolic process		GO:0016787,hydrolase activity|GO:0030246,carbohydrate binding|GO:0016798,hydrolase activity, acting on glycosyl bonds|GO:0003824,catalytic activity|GO:0005488,binding|GO:0004553,hydrolase activity, hydrolyzing O-glycosyl compounds
B2R644	4.17854	2.063	O94760	DDAH1	GO:0019222,regulation of metabolic process|GO:0072359,circulatory system development|GO:0003013,circulatory system process|GO:0007165,signal transduction|GO:0044282,small molecule catabolic process|GO:0044712,single-organism catabolic process|GO:0044710,single-organism metabolic process|GO:0048514,blood vessel morphogenesis|GO:0048518,positive regulation of biological process|GO:0043436,oxoacid m…	GO:0043231,intracellular membrane-bounded organelle|GO:0005737,cytoplasm|GO:0005622,intracellular|GO:0043230,extracellular organelle|GO:0031982,vesicle|GO:0044421,extracellular region part|GO:0043227,membrane-bounded organelle|GO:0044464,cell part|GO:0044444,cytoplasmic part|GO:0005739,mitochondrion|GO:0031988,membrane-bounded vesicle|GO:0043229,intracellular organelle|GO:0005576,extracellular re…	GO:0043168,anion binding|GO:0016787,hydrolase activity|GO:0043169,cation binding|GO:0043177,organic acid binding|GO:0016813,hydrolase activity, acting on carbon-nitrogen (but not peptide) bonds, in linear amidines|GO:0016810,hydrolase activity, acting on carbon-nitrogen (but not peptide) bonds|GO:0031406,carboxylic acid binding|GO:0043167,ion binding|GO:0036094,small molecule binding|GO:0003824,c…
O43809	4.17854	2.063	O43809	NUDT21	GO:0022607,cellular component assembly|GO:0032774,RNA biosynthetic process|GO:0070271,protein complex biogenesis|GO:0043933,macromolecular complex subunit organization|GO:0044237,cellular metabolic process|GO:0090304,nucleic acid metabolic process|GO:0044249,cellular biosynthetic process|GO:0034641,cellular nitrogen compound metabolic process|GO:0006807,nitrogen compound metabolic process|GO:0016…	GO:0044464,cell part|GO:0031974,membrane-enclosed lumen|GO:0043229,intracellular organelle|GO:0043228,non-membrane-bounded organelle|GO:0043227,membrane-bounded organelle|GO:0043226,organelle|GO:0005856,cytoskeleton|GO:0016604,nuclear body|GO:0031981,nuclear lumen|GO:0005813,centrosome|GO:0005634,nucleus|GO:0005815,microtubule organizing center|GO:0005654,nucleoplasm|GO:0044430,cytoskeletal part|…	GO:0005488,binding|GO:0016787,hydrolase activity|GO:0005515,protein binding|GO:0097159,organic cyclic compound binding|GO:0044822,poly(A) RNA binding|GO:0019899,enzyme binding|GO:0017091,AU-rich element binding|GO:0003824,catalytic activity|GO:0003723,RNA binding|GO:0003676,nucleic acid binding|GO:0046983,protein dimerization activity|GO:0042803,protein homodimerization activity|GO:0042826,histon…	hsa03015,mRNA surveillance pathway
Q13344	4.17275	2.061	Q13344	Q13344	GO:0080090,regulation of primary metabolic process|GO:0019222,regulation of metabolic process|GO:0031326,regulation of cellular biosynthetic process|GO:0031323,regulation of cellular metabolic process|GO:0090304,nucleic acid metabolic process|GO:0044249,cellular biosynthetic process|GO:0034641,cellular nitrogen compound metabolic process|GO:0006807,nitrogen compound metabolic process|GO:0034645,c…		GO:0043169,cation binding|GO:0097159,organic cyclic compound binding|GO:0043167,ion binding|GO:0003723,RNA binding|GO:0003676,nucleic acid binding|GO:0046872,metal ion binding|GO:1901363,heterocyclic compound binding|GO:0005488,binding
P62826	4.16697	2.059	P62826	RAN	GO:0051169,nuclear transport|GO:0051168,nuclear export|GO:0080090,regulation of primary metabolic process|GO:0019222,regulation of metabolic process|GO:0000060,protein import into nucleus, translocation|GO:0030518,intracellular steroid hormone receptor signaling pathway|GO:0008104,protein localization|GO:0007165,signal transduction|GO:0051656,establishment of organelle localization|GO:1901362,org…	GO:0098796,membrane protein complex|GO:0044421,extracellular region part|GO:0044464,cell part|GO:0055037,recycling endosome|GO:0048770,pigment granule|GO:0031974,membrane-enclosed lumen|GO:0031074,nucleocytoplasmic transport complex|GO:0043229,intracellular organelle|GO:0043228,non-membrane-bounded organelle|GO:0000785,chromatin|GO:0005815,microtubule organizing center|GO:0043227,membrane-bounded…	GO:0035639,purine ribonucleoside triphosphate binding|GO:0050681,androgen receptor binding|GO:0070883,pre-miRNA binding|GO:0044877,macromolecular complex binding|GO:0005488,binding|GO:0003676,nucleic acid binding|GO:0043167,ion binding|GO:1901363,heterocyclic compound binding|GO:0001883,purine nucleoside binding|GO:0001882,nucleoside binding|GO:0043168,anion binding|GO:0019001,guanyl nucleotide b…	hsa03008,Ribosome biogenesis in eukaryotes|hsa05166,Human T-cell leukemia virus 1 infection|hsa03013,RNA transport
P14866	4.11816	2.042	P14866	HNRNPL	GO:0090304,nucleic acid metabolic process|GO:0034641,cellular nitrogen compound metabolic process|GO:0006807,nitrogen compound metabolic process|GO:0044237,cellular metabolic process|GO:1901360,organic cyclic compound metabolic process|GO:0006139,nucleobase-containing compound metabolic process|GO:0044260,cellular macromolecule metabolic process|GO:0071704,organic substance metabolic process|GO:0…	GO:0031974,membrane-enclosed lumen|GO:0043229,intracellular organelle|GO:0030529,intracellular ribonucleoprotein complex|GO:0043227,membrane-bounded organelle|GO:0043226,organelle|GO:0005737,cytoplasm|GO:0070062,extracellular exosome|GO:0031981,nuclear lumen|GO:0005634,nucleus|GO:0016020,membrane|GO:0031988,membrane-bounded vesicle|GO:0005654,nucleoplasm|GO:0032991,macromolecular complex|GO:19035…	GO:0044212,transcription regulatory region DNA binding|GO:0005515,protein binding|GO:0097159,organic cyclic compound binding|GO:0044822,poly(A) RNA binding|GO:0000975,regulatory region DNA binding|GO:0001067,regulatory region nucleic acid binding|GO:0000166,nucleotide binding|GO:0036094,small molecule binding|GO:0003723,RNA binding|GO:0003676,nucleic acid binding|GO:0003677,DNA binding|GO:1901363…
P38159	4.11246	2.04	P38159	RBMX	GO:0080090,regulation of primary metabolic process|GO:0019222,regulation of metabolic process|GO:0050685,positive regulation of mRNA processing|GO:0050684,regulation of mRNA processing|GO:0050686,negative regulation of mRNA processing|GO:0001503,ossification|GO:1901362,organic cyclic compound biosynthetic process|GO:0071840,cellular component organization or biogenesis|GO:0000245,spliceosomal com…	GO:0031974,membrane-enclosed lumen|GO:0043229,intracellular organelle|GO:0043228,non-membrane-bounded organelle|GO:0000785,chromatin|GO:0000228,nuclear chromosome|GO:0030529,intracellular ribonucleoprotein complex|GO:0043227,membrane-bounded organelle|GO:0043226,organelle|GO:0005719,nuclear euchromatin|GO:0070062,extracellular exosome|GO:0031981,nuclear lumen|GO:0005615,extracellular space|GO:000…	GO:0005488,binding|GO:0044212,transcription regulatory region DNA binding|GO:0003676,nucleic acid binding|GO:0005515,protein binding|GO:0097159,organic cyclic compound binding|GO:0044822,poly(A) RNA binding|GO:0003677,DNA binding|GO:0001067,regulatory region nucleic acid binding|GO:0000166,nucleotide binding|GO:0036094,small molecule binding|GO:0003727,single-stranded RNA binding|GO:0044877,macro…	hsa03040,Spliceosome
Q96AE4	4.02503	2.009	Q96AE4	FUBP1	GO:0032774,RNA biosynthetic process|GO:0080090,regulation of primary metabolic process|GO:0019222,regulation of metabolic process|GO:0031328,positive regulation of cellular biosynthetic process|GO:0031326,regulation of cellular biosynthetic process|GO:0031325,positive regulation of cellular metabolic process|GO:0051173,positive regulation of nitrogen compound metabolic process|GO:0031323,regulati…	GO:0044446,intracellular organelle part|GO:0043231,intracellular membrane-bounded organelle|GO:0031981,nuclear lumen|GO:0043233,organelle lumen|GO:0005634,nucleus|GO:0044464,cell part|GO:0031974,membrane-enclosed lumen|GO:0005622,intracellular|GO:0005654,nucleoplasm|GO:0070013,intracellular organelle lumen|GO:0043229,intracellular organelle|GO:0044428,nuclear part|GO:0005623,cell|GO:0044424,intra…	GO:0043566,structure-specific DNA binding|GO:0005515,protein binding|GO:0003700,transcription factor activity, sequence-specific DNA binding|GO:0097159,organic cyclic compound binding|GO:0044822,poly(A) RNA binding|GO:0003705,transcription factor activity, RNA polymerase II distal enhancer sequence-specific binding|GO:0001071,nucleic acid binding transcription factor activity|GO:0001228,transcrip…
Q96PK6	4.02224	2.008	Q96PK6	RBM14	GO:0080090,regulation of primary metabolic process|GO:0019222,regulation of metabolic process|GO:2001141,regulation of RNA biosynthetic process|GO:0006476,protein deacetylation|GO:0007165,signal transduction|GO:1901362,organic cyclic compound biosynthetic process|GO:0071840,cellular component organization or biogenesis|GO:0044710,single-organism metabolic process|GO:0045786,negative regulation of…	GO:0031974,membrane-enclosed lumen|GO:0043229,intracellular organelle|GO:0043228,non-membrane-bounded organelle|GO:0016592,mediator complex|GO:0043227,membrane-bounded organelle|GO:0043226,organelle|GO:0031981,nuclear lumen|GO:0005730,nucleolus|GO:0005634,nucleus|GO:0030529,intracellular ribonucleoprotein complex|GO:0005654,nucleoplasm|GO:0044451,nucleoplasm part|GO:0043234,protein complex|GO:003…	GO:0005488,binding|GO:0001104,RNA polymerase II transcription cofactor activity|GO:0030674,protein binding, bridging|GO:0005515,protein binding|GO:0097159,organic cyclic compound binding|GO:0044822,poly(A) RNA binding|GO:0003713,transcription coactivator activity|GO:0003712,transcription cofactor activity|GO:0000166,nucleotide binding|GO:0036094,small molecule binding|GO:0001076,transcription fac…
Q92626	4.00277	2.001	Q92626	PXDN	GO:0042221,response to chemical|GO:0019221,cytokine-mediated signaling pathway|GO:0048585,negative regulation of response to stimulus|GO:0048583,regulation of response to stimulus|GO:0044248,cellular catabolic process|GO:0023057,negative regulation of signaling|GO:0042744,hydrogen peroxide catabolic process|GO:0023052,signaling|GO:0010648,negative regulation of cell communication|GO:0007166,cell …	GO:0005783,endoplasmic reticulum|GO:0031012,extracellular matrix|GO:0043229,intracellular organelle|GO:0043227,membrane-bounded organelle|GO:0043226,organelle|GO:0005737,cytoplasm|GO:0070062,extracellular exosome|GO:0031988,membrane-bounded vesicle|GO:0031982,vesicle|GO:0012505,endomembrane system|GO:1903561,extracellular vesicle|GO:0005615,extracellular space|GO:0043230,extracellular organelle|G…	GO:0005126,cytokine receptor binding|GO:0005201,extracellular matrix structural constituent|GO:0019966,interleukin-1 binding|GO:0019955,cytokine binding|GO:0005488,binding|GO:0043167,ion binding|GO:1901363,heterocyclic compound binding|GO:0016491,oxidoreductase activity|GO:0043169,cation binding|GO:0098772,molecular function regulator|GO:0030545,receptor regulator activity|GO:0030547,receptor inh…
P23526	3.97788	1.992	P23526	AHCY	GO:0007610,behavior|GO:0009164,nucleoside catabolic process|GO:0044281,small molecule metabolic process|GO:0044282,small molecule catabolic process|GO:0044283,small molecule biosynthetic process|GO:0046130,purine ribonucleoside catabolic process|GO:1901360,organic cyclic compound metabolic process|GO:1901361,organic cyclic compound catabolic process|GO:0044712,single-organism catabolic process|GO…	GO:0048770,pigment granule|GO:0043229,intracellular organelle|GO:0043227,membrane-bounded organelle|GO:0043226,organelle|GO:0005737,cytoplasm|GO:1903561,extracellular vesicle|GO:0070062,extracellular exosome|GO:0016023,cytoplasmic, membrane-bounded vesicle|GO:0031410,cytoplasmic vesicle|GO:0005634,nucleus|GO:0031988,membrane-bounded vesicle|GO:0097458,neuron part|GO:0043005,neuron projection|GO:0…	GO:0016787,hydrolase activity|GO:0030554,adenyl nucleotide binding|GO:0016801,hydrolase activity, acting on ether bonds|GO:0051287,NAD binding|GO:0004013,adenosylhomocysteinase activity|GO:0016802,trialkylsulfonium hydrolase activity|GO:0036094,small molecule binding|GO:0000166,nucleotide binding|GO:0050662,coenzyme binding|GO:0003824,catalytic activity|GO:0048037,cofactor binding|GO:0042802,iden…	hsa01100,Metabolic pathways|hsa00270,Cysteine and methionine metabolism
Q01844	3.96137	1.986	Q01844	EWSR1	GO:0080090,regulation of primary metabolic process|GO:0019222,regulation of metabolic process|GO:0031326,regulation of cellular biosynthetic process|GO:0031323,regulation of cellular metabolic process|GO:0090304,nucleic acid metabolic process|GO:0044249,cellular biosynthetic process|GO:0034641,cellular nitrogen compound metabolic process|GO:0006807,nitrogen compound metabolic process|GO:0034645,c…	GO:0031974,membrane-enclosed lumen|GO:0043229,intracellular organelle|GO:0071944,cell periphery|GO:0043227,membrane-bounded organelle|GO:0043226,organelle|GO:0005737,cytoplasm|GO:0031981,nuclear lumen|GO:0005730,nucleolus|GO:0005634,nucleus|GO:0016020,membrane|GO:0005654,nucleoplasm|GO:0005886,plasma membrane|GO:0043231,intracellular membrane-bounded organelle|GO:0043232,intracellular non-membran…	GO:0005488,binding|GO:0043169,cation binding|GO:0005515,protein binding|GO:0046914,transition metal ion binding|GO:0097159,organic cyclic compound binding|GO:0044822,poly(A) RNA binding|GO:0000166,nucleotide binding|GO:0036094,small molecule binding|GO:0043167,ion binding|GO:0042802,identical protein binding|GO:0003723,RNA binding|GO:0003676,nucleic acid binding|GO:0005516,calmodulin binding|GO:0…	hsa05202,Transcriptional misregulation in cancer	H00035,Ewing's sarcoma|H00052,Clear cell sarcoma of soft tissue|H00053,Extraskeletal myxoid chondrosarcoma
P0DMV9	3.90413	1.965	P0DMV9	HSPA1B	GO:2001234,negative regulation of apoptotic signaling pathway|GO:2001236,regulation of extrinsic apoptotic signaling pathway|GO:2001237,negative regulation of extrinsic apoptotic signaling pathway|GO:0090083,regulation of inclusion body assembly|GO:0019221,cytokine-mediated signaling pathway|GO:0019222,regulation of metabolic process|GO:2001233,regulation of apoptotic signaling pathway|GO:0048585…	GO:0016234,inclusion body|GO:0043229,intracellular organelle|GO:0043228,non-membrane-bounded organelle|GO:0072562,blood microparticle|GO:0005924,cell-substrate adherens junction|GO:0005925,focal adhesion|GO:0043226,organelle|GO:0030054,cell junction|GO:0030055,cell-substrate junction|GO:0005856,cytoskeleton|GO:0005615,extracellular space|GO:0005813,centrosome|GO:0005814,centriole|GO:0005815,micro…	GO:0044389,ubiquitin-like protein ligase binding|GO:0035639,purine ribonucleoside triphosphate binding|GO:0044183,protein binding involved in protein folding|GO:0019899,enzyme binding|GO:0060089,molecular transducer activity|GO:0004872,receptor activity|GO:0016887,ATPase activity|GO:0031072,heat shock protein binding|GO:0043167,ion binding|GO:1901363,heterocyclic compound binding|GO:0001883,purin…	hsa05134,Legionellosis|hsa03040,Spliceosome|hsa04612,Antigen processing and presentation|hsa04915,Estrogen signaling pathway|hsa04141,Protein processing in endoplasmic reticulum|hsa04144,Endocytosis|hsa04010,MAPK signaling pathway|hsa05164,Influenza A|hsa04213,Longevity regulating pathway - multiple species|hsa05145,Toxoplasmosis|hsa05162,Measles|hsa05020,Prion diseases
P08621	3.88523	1.958	P08621	SNRNP70	GO:0080090,regulation of primary metabolic process|GO:0019222,regulation of metabolic process|GO:0050685,positive regulation of mRNA processing|GO:0050684,regulation of mRNA processing|GO:0031325,positive regulation of cellular metabolic process|GO:0031323,regulation of cellular metabolic process|GO:0090304,nucleic acid metabolic process|GO:0034641,cellular nitrogen compound metabolic process|GO:…	GO:0031974,membrane-enclosed lumen|GO:0043229,intracellular organelle|GO:0043227,membrane-bounded organelle|GO:0043226,organelle|GO:0016607,nuclear speck|GO:0044446,intracellular organelle part|GO:0016604,nuclear body|GO:0031981,nuclear lumen|GO:0005634,nucleus|GO:0030529,intracellular ribonucleoprotein complex|GO:0005654,nucleoplasm|GO:0044451,nucleoplasm part|GO:0032991,macromolecular complex|G…	GO:0005515,protein binding|GO:0097159,organic cyclic compound binding|GO:0044822,poly(A) RNA binding|GO:0000166,nucleotide binding|GO:0036094,small molecule binding|GO:0003723,RNA binding|GO:0003676,nucleic acid binding|GO:1901363,heterocyclic compound binding|GO:1901265,nucleoside phosphate binding|GO:0005488,binding|GO:0030619,U1 snRNA binding|GO:1990446,U1 snRNP binding|GO:0070990,snRNP bindin…	hsa03040,Spliceosome
Q9Y6M1	3.85572	1.947	Q9Y6M1	IGF2BP2	GO:0015931,nucleobase-containing compound transport|GO:0044238,primary metabolic process|GO:0009892,negative regulation of metabolic process|GO:0080090,regulation of primary metabolic process|GO:0009890,negative regulation of biosynthetic process|GO:0031327,negative regulation of cellular biosynthetic process|GO:0051246,regulation of protein metabolic process|GO:0031324,negative regulation of cel…	GO:0005856,cytoskeleton|GO:0005737,cytoplasm|GO:0005829,cytosol|GO:0043231,intracellular membrane-bounded organelle|GO:0043232,intracellular non-membrane-bounded organelle|GO:0005634,nucleus|GO:0044464,cell part|GO:0044444,cytoplasmic part|GO:0005623,cell|GO:0005622,intracellular|GO:0043229,intracellular organelle|GO:0043228,non-membrane-bounded organelle|GO:0044424,intracellular part|GO:0043227,…	GO:0005488,binding|GO:0003729,mRNA binding|GO:0005515,protein binding|GO:0097159,organic cyclic compound binding|GO:0044822,poly(A) RNA binding|GO:0000166,nucleotide binding|GO:0036094,small molecule binding|GO:0003723,RNA binding|GO:0003676,nucleic acid binding|GO:0048027,mRNA 5'-UTR binding|GO:0045182,translation regulator activity|GO:1901363,heterocyclic compound binding|GO:1901265,nucleoside …
P62312	3.8344	1.939	P62312	LSM6	GO:0090304,nucleic acid metabolic process|GO:0034641,cellular nitrogen compound metabolic process|GO:0006807,nitrogen compound metabolic process|GO:0044237,cellular metabolic process|GO:0008033,tRNA processing|GO:0034660,ncRNA metabolic process|GO:0071840,cellular component organization or biogenesis|GO:1901361,organic cyclic compound catabolic process|GO:0006139,nucleobase-containing compound me…	GO:0035770,ribonucleoprotein granule|GO:0005732,small nucleolar ribonucleoprotein complex|GO:0044464,cell part|GO:0031974,membrane-enclosed lumen|GO:0043229,intracellular organelle|GO:0043228,non-membrane-bounded organelle|GO:0036464,cytoplasmic ribonucleoprotein granule|GO:0030529,intracellular ribonucleoprotein complex|GO:0043227,membrane-bounded organelle|GO:0043226,organelle|GO:0005737,cytopl…	GO:0003676,nucleic acid binding|GO:0097159,organic cyclic compound binding|GO:0044822,poly(A) RNA binding|GO:0003723,RNA binding|GO:0005515,protein binding|GO:1901363,heterocyclic compound binding|GO:0005488,binding	hsa03040,Spliceosome|hsa03018,RNA degradation
P61955	3.81848	1.933	P61955	P61955
P31040	3.72955	1.899	P31040	SDHA	GO:0044707,single-multicellular organism process|GO:0019752,carboxylic acid metabolic process|GO:0006099,tricarboxylic acid cycle|GO:0009060,aerobic respiration|GO:0044281,small molecule metabolic process|GO:0006091,generation of precursor metabolites and energy|GO:0072350,tricarboxylic acid metabolic process|GO:0007275,multicellular organism development|GO:0044699,single-organism process|GO:0044…	GO:0098803,respiratory chain complex|GO:1990204,oxidoreductase complex|GO:0043229,intracellular organelle|GO:0045281,succinate dehydrogenase complex|GO:0043227,membrane-bounded organelle|GO:0043226,organelle|GO:0005737,cytoplasm|GO:0031090,organelle membrane|GO:0098796,membrane protein complex|GO:0043209,myelin sheath|GO:0016020,membrane|GO:0045283,fumarate reductase complex|GO:0044444,cytoplasmi…	GO:0043168,anion binding|GO:0050662,coenzyme binding|GO:0050660,flavin adenine dinucleotide binding|GO:0043167,ion binding|GO:0097159,organic cyclic compound binding|GO:0016627,oxidoreductase activity, acting on the CH-CH group of donors|GO:0016635,oxidoreductase activity, acting on the CH-CH group of donors, quinone or related compound as acceptor|GO:0000166,nucleotide binding|GO:0036094,small m…	hsa05012,Parkinson disease|hsa00190,Oxidative phosphorylation|hsa05010,Alzheimer disease|hsa01100,Metabolic pathways|hsa01200,Carbon metabolism|hsa00020,Citrate cycle (TCA cycle)|hsa05016,Huntington disease|hsa04714,Thermogenesis|hsa04932,Non-alcoholic fatty liver disease
Q9Y2J2	3.69609	1.886	Q9Y2J2	EPB41L3	GO:0008104,protein localization|GO:0048468,cell development|GO:0061024,membrane organization|GO:0007009,plasma membrane organization|GO:0030182,neuron differentiation|GO:0051651,maintenance of location in cell|GO:0071840,cellular component organization or biogenesis|GO:0070727,cellular macromolecule localization|GO:0030913,paranodal junction assembly|GO:0048869,cellular developmental process|GO:0…	GO:0098590,plasma membrane region|GO:0019898,extrinsic component of membrane|GO:0043229,intracellular organelle|GO:0043228,non-membrane-bounded organelle|GO:0045202,synapse|GO:0043226,organelle|GO:0030054,cell junction|GO:0005856,cytoskeleton|GO:0044304,main axon|GO:0042995,cell projection|GO:0098805,whole membrane|GO:0016020,membrane|GO:0044224,juxtaparanode region of axon|GO:0097458,neuron part…	GO:0005200,structural constituent of cytoskeleton|GO:0008092,cytoskeletal protein binding|GO:0005198,structural molecule activity|GO:0003779,actin binding|GO:0005488,binding|GO:0005515,protein binding	hsa04530,Tight junction
Q96PU8	3.69097	1.884	Q96PU8	QKI	GO:0080090,regulation of primary metabolic process|GO:0019222,regulation of metabolic process|GO:0048468,cell development|GO:0072359,circulatory system development|GO:0072358,cardiovascular system development|GO:0044281,small molecule metabolic process|GO:0044283,small molecule biosynthetic process|GO:1901360,organic cyclic compound metabolic process|GO:0044710,single-organism metabolic process|G…	GO:0005737,cytoplasm|GO:0043231,intracellular membrane-bounded organelle|GO:0005634,nucleus|GO:0044464,cell part|GO:0005623,cell|GO:0005622,intracellular|GO:0043229,intracellular organelle|GO:0044424,intracellular part|GO:0043227,membrane-bounded organelle|GO:0043226,organelle|GO:0045202,synapse	GO:0005488,binding|GO:0005515,protein binding|GO:0097159,organic cyclic compound binding|GO:0044822,poly(A) RNA binding|GO:0017124,SH3 domain binding|GO:0003723,RNA binding|GO:0003676,nucleic acid binding|GO:1901363,heterocyclic compound binding|GO:0019904,protein domain specific binding|GO:0003729,mRNA binding
P13667	3.66547	1.874	P13667	PDIA4	GO:0008104,protein localization|GO:0006457,protein folding|GO:0042592,homeostatic process|GO:0032940,secretion by cell|GO:0050789,regulation of biological process|GO:0044699,single-organism process|GO:0044267,cellular protein metabolic process|GO:0051716,cellular response to stimulus|GO:0044260,cellular macromolecule metabolic process|GO:0051179,localization|GO:0071704,organic substance metabolic…	GO:0005783,endoplasmic reticulum|GO:0005788,endoplasmic reticulum lumen|GO:0048770,pigment granule|GO:0031974,membrane-enclosed lumen|GO:0043229,intracellular organelle|GO:0043227,membrane-bounded organelle|GO:0043226,organelle|GO:0005737,cytoplasm|GO:0031982,vesicle|GO:0016023,cytoplasmic, membrane-bounded vesicle|GO:0031410,cytoplasmic vesicle|GO:0031988,membrane-bounded vesicle|GO:0044432,endo…	GO:0005488,binding|GO:0016853,isomerase activity|GO:0005515,protein binding|GO:0097159,organic cyclic compound binding|GO:0044822,poly(A) RNA binding|GO:0003824,catalytic activity|GO:0003756,protein disulfide isomerase activity|GO:0003676,nucleic acid binding|GO:0003723,RNA binding|GO:0016864,intramolecular oxidoreductase activity, transposing S-S bonds|GO:1901363,heterocyclic compound binding|GO…	hsa04141,Protein processing in endoplasmic reticulum|hsa05110,Vibrio cholerae infection|hsa04918,Thyroid hormone synthesis
Q9Y265	3.65279	1.869	Q9Y265	RUVBL1	GO:0033157,regulation of intracellular protein transport|GO:0008104,protein localization|GO:0032388,positive regulation of intracellular transport|GO:0080090,regulation of primary metabolic process|GO:0019222,regulation of metabolic process|GO:0034080,CENP-A containing nucleosome assembly|GO:0051049,regulation of transport|GO:0032386,regulation of intracellular transport|GO:0072655,establishment …	GO:0043231,intracellular membrane-bounded organelle|GO:0033202,DNA helicase complex|GO:0016020,membrane|GO:0031011,Ino80 complex|GO:0031974,membrane-enclosed lumen|GO:0043229,intracellular organelle|GO:0043228,non-membrane-bounded organelle|GO:0000785,chromatin|GO:0035267,NuA4 histone acetyltransferase complex|GO:1902562,H4 histone acetyltransferase complex|GO:0000228,nuclear chromosome|GO:000581…	GO:0035639,purine ribonucleoside triphosphate binding|GO:0005488,binding|GO:0016887,ATPase activity|GO:0003678,DNA helicase activity|GO:0043167,ion binding|GO:1901363,heterocyclic compound binding|GO:1901265,nucleoside phosphate binding|GO:0001882,nucleoside binding|GO:0043168,anion binding|GO:0000166,nucleotide binding|GO:0001883,purine nucleoside binding|GO:0032549,ribonucleoside binding|GO:001…	hsa04310,Wnt signaling pathway
P21579	3.63763	1.863	P21579	SYT1	GO:0009593,detection of chemical stimulus|GO:0010038,response to metal ion|GO:0051046,regulation of secretion|GO:0048588,developmental cell growth|GO:0051049,regulation of transport|GO:0048468,cell development|GO:0006820,anion transport|GO:0001505,regulation of neurotransmitter levels|GO:0051641,cellular localization|GO:1903861,positive regulation of dendrite extension|GO:0051656,establishment of…	GO:0008021,synaptic vesicle|GO:0012505,endomembrane system|GO:0098590,plasma membrane region|GO:0060198,clathrin-sculpted vesicle|GO:0060199,clathrin-sculpted glutamate transport vesicle|GO:0060203,clathrin-sculpted glutamate transport vesicle membrane|GO:0060200,clathrin-sculpted acetylcholine transport vesicle|GO:0060201,clathrin-sculpted acetylcholine transport vesicle membrane|GO:0045202,syna…	GO:0048306,calcium-dependent protein binding|GO:0005488,binding|GO:0043168,anion binding|GO:0043169,cation binding|GO:0000149,SNARE binding|GO:0005543,phospholipid binding|GO:0005544,calcium-dependent phospholipid binding|GO:0005545,1-phosphatidylinositol binding|GO:0005546,phosphatidylinositol-4,5-bisphosphate binding|GO:0043167,ion binding|GO:1902936,phosphatidylinositol bisphosphate binding|GO…	hsa04721,Synaptic vesicle cycle
Q8TAQ2	3.6025	1.849	Q8TAQ2	SMARCC2	GO:0080090,regulation of primary metabolic process|GO:0019222,regulation of metabolic process|GO:0060322,head development|GO:1901362,organic cyclic compound biosynthetic process|GO:0071840,cellular component organization or biogenesis|GO:0010605,negative regulation of macromolecule metabolic process|GO:0010604,positive regulation of macromolecule metabolic process|GO:0048869,cellular developmenta…	GO:0031974,membrane-enclosed lumen|GO:0043229,intracellular organelle|GO:0043228,non-membrane-bounded organelle|GO:0000785,chromatin|GO:0000228,nuclear chromosome|GO:0043227,membrane-bounded organelle|GO:0043226,organelle|GO:0070603,SWI/SNF superfamily-type complex|GO:0031981,nuclear lumen|GO:0097458,neuron part|GO:0005634,nucleus|GO:0005654,nucleoplasm|GO:0044454,nuclear chromosome part|GO:00165…	GO:0001012,RNA polymerase II regulatory region DNA binding|GO:0001159,core promoter proximal region DNA binding|GO:0001158,enhancer sequence-specific DNA binding|GO:0031491,nucleosome binding|GO:0031490,chromatin DNA binding|GO:0031492,nucleosomal DNA binding|GO:0044877,macromolecular complex binding|GO:0005488,binding|GO:0003676,nucleic acid binding|GO:0003677,DNA binding|GO:1901363,heterocyclic…	hsa05225,Hepatocellular carcinoma|hsa04714,Thermogenesis
P38919	3.60001	1.848	P38919	EIF4A3	GO:0019221,cytokine-mediated signaling pathway|GO:0019222,regulation of metabolic process|GO:0001501,skeletal system development|GO:0007165,signal transduction|GO:0007166,cell surface receptor signaling pathway|GO:0071840,cellular component organization or biogenesis|GO:0080090,regulation of primary metabolic process|GO:0051716,cellular response to stimulus|GO:0010605,negative regulation of macro…	GO:0035145,exon-exon junction complex|GO:0031974,membrane-enclosed lumen|GO:0043229,intracellular organelle|GO:0043227,membrane-bounded organelle|GO:0043226,organelle|GO:0016607,nuclear speck|GO:0016604,nuclear body|GO:0031981,nuclear lumen|GO:0005634,nucleus|GO:0016020,membrane|GO:0030529,intracellular ribonucleoprotein complex|GO:0005654,nucleoplasm|GO:0044451,nucleoplasm part|GO:0005737,cytopl…	GO:0016887,ATPase activity|GO:0008026,ATP-dependent helicase activity|GO:0008143,poly(A) binding|GO:0005488,binding|GO:0003676,nucleic acid binding|GO:0008186,RNA-dependent ATPase activity|GO:0043167,ion binding|GO:1901363,heterocyclic compound binding|GO:0001883,purine nucleoside binding|GO:0001882,nucleoside binding|GO:0043168,anion binding|GO:0042623,ATPase activity, coupled|GO:0000166,nucleot…	hsa03015,mRNA surveillance pathway|hsa03013,RNA transport|hsa03040,Spliceosome
P23470	3.59253	1.845	P23470	PTPRG	GO:0044707,single-multicellular organism process|GO:0008152,metabolic process|GO:0051234,establishment of localization|GO:0016311,dephosphorylation|GO:0006470,protein dephosphorylation|GO:0030155,regulation of cell adhesion|GO:1901998,toxin transport|GO:0035335,peptidyl-tyrosine dephosphorylation|GO:0006928,movement of cell or subcellular component|GO:0032501,multicellular organismal process|GO:0…	GO:0071944,cell periphery|GO:0031226,intrinsic component of plasma membrane|GO:0043226,organelle|GO:0031224,intrinsic component of membrane|GO:0031982,vesicle|GO:0043227,membrane-bounded organelle|GO:0016021,integral component of membrane|GO:0016020,membrane|GO:0031988,membrane-bounded vesicle|GO:0044459,plasma membrane part|GO:0005887,integral component of plasma membrane|GO:0005886,plasma membr…	GO:0042578,phosphoric ester hydrolase activity|GO:0038023,signaling receptor activity|GO:0005515,protein binding|GO:0016788,hydrolase activity, acting on ester bonds|GO:0016787,hydrolase activity|GO:0004725,protein tyrosine phosphatase activity|GO:0004721,phosphoprotein phosphatase activity|GO:0005001,transmembrane receptor protein tyrosine phosphatase activity|GO:0060089,molecular transducer act…
P31930	3.54062	1.824	P31930	UQCRC1	GO:0042221,response to chemical|GO:0050896,response to stimulus|GO:0051234,establishment of localization|GO:1902600,hydrogen ion transmembrane transport|GO:0009141,nucleoside triphosphate metabolic process|GO:0009144,purine nucleoside triphosphate metabolic process|GO:0009167,purine ribonucleoside monophosphate metabolic process|GO:0034641,cellular nitrogen compound metabolic process|GO:0009060,a…	GO:0044464,cell part|GO:1990204,oxidoreductase complex|GO:0043229,intracellular organelle|GO:0070069,cytochrome complex|GO:0043227,membrane-bounded organelle|GO:0043226,organelle|GO:0031224,intrinsic component of membrane|GO:0005737,cytoplasm|GO:0031090,organelle membrane|GO:0098796,membrane protein complex|GO:0043209,myelin sheath|GO:0016021,integral component of membrane|GO:0016020,membrane|GO:…	GO:0004175,endopeptidase activity|GO:0044389,ubiquitin-like protein ligase binding|GO:0008121,ubiquinol-cytochrome-c reductase activity|GO:0019899,enzyme binding|GO:0044877,macromolecular complex binding|GO:0008270,zinc ion binding|GO:0008233,peptidase activity|GO:0008237,metallopeptidase activity|GO:0016491,oxidoreductase activity|GO:0043169,cation binding|GO:0046914,transition metal ion binding…	hsa00190,Oxidative phosphorylation|hsa04714,Thermogenesis|hsa01100,Metabolic pathways|hsa04260,Cardiac muscle contraction|hsa05012,Parkinson disease|hsa05016,Huntington disease|hsa05010,Alzheimer disease|hsa04932,Non-alcoholic fatty liver disease
P68371	3.53816	1.823	P68371	TUBB4B	GO:0022607,cellular component assembly|GO:0006457,protein folding|GO:0044839,cell cycle G2/M phase transition|GO:0070271,protein complex biogenesis|GO:0000086,G2/M transition of mitotic cell cycle|GO:0006458,'de novo' protein folding|GO:1903047,mitotic cell cycle process|GO:0006928,movement of cell or subcellular component|GO:0044770,cell cycle phase transition|GO:0044772,mitotic cell cycle phase…	GO:0043229,intracellular organelle|GO:0043228,non-membrane-bounded organelle|GO:0005874,microtubule|GO:0043226,organelle|GO:0005856,cytoskeleton|GO:0031982,vesicle|GO:0043209,myelin sheath|GO:0043227,membrane-bounded organelle|GO:0005634,nucleus|GO:0031988,membrane-bounded vesicle|GO:0044430,cytoskeletal part|GO:0005737,cytoplasm|GO:0015630,microtubule cytoskeleton|GO:0032991,macromolecular compl…	GO:0005200,structural constituent of cytoskeleton|GO:0035639,purine ribonucleoside triphosphate binding|GO:0005488,binding|GO:0003676,nucleic acid binding|GO:0000166,nucleotide binding|GO:1901363,heterocyclic compound binding|GO:0001883,purine nucleoside binding|GO:0001882,nucleoside binding|GO:0043168,anion binding|GO:0016462,pyrophosphatase activity|GO:0051082,unfolded protein binding|GO:000519…	hsa05130,Pathogenic Escherichia coli infection|hsa04145,Phagosome|hsa04540,Gap junction		D00491,Paclitaxel (JAN/USP/INN); Abraxane (TN); Taxol (TN)|D00570,Colchicine (JP16/USP); Colchicine (TN)|D01068,Vinblastine sulfate (JP16/USP); Exal (TN); Velban (TN)|D01769,Vindesine sulfate (JAN/USAN); Fildesin (TN)|D01935,Vinorelbine ditartrate (JAN); Vinorelbine tartrate (USP); KW 2307; Navelbine (TN)|D02165,Docetaxel hydrate (JP16); Docetaxel (USAN); Docetaxel injection (JP16); Docetaxel for…
P38646	3.52837	1.819	P38646	HSPA9	GO:0051169,nuclear transport|GO:0051168,nuclear export|GO:0006457,protein folding|GO:0006611,protein export from nucleus|GO:0009636,response to toxic substance|GO:0051649,establishment of localization in cell|GO:0008104,protein localization|GO:0070887,cellular response to chemical stimulus|GO:0050896,response to stimulus|GO:0008219,cell death|GO:0010941,regulation of cell death|GO:0042981,regulat…	GO:0031974,membrane-enclosed lumen|GO:0043229,intracellular organelle|GO:0043228,non-membrane-bounded organelle|GO:0005924,cell-substrate adherens junction|GO:0042645,mitochondrial nucleoid|GO:0043227,membrane-bounded organelle|GO:0043226,organelle|GO:0030054,cell junction|GO:0030055,cell-substrate junction|GO:0005737,cytoplasm|GO:0005925,focal adhesion|GO:0070062,extracellular exosome|GO:0031981…	GO:0044389,ubiquitin-like protein ligase binding|GO:0035639,purine ribonucleoside triphosphate binding|GO:0031072,heat shock protein binding|GO:0019899,enzyme binding|GO:0005488,binding|GO:0003676,nucleic acid binding|GO:0000166,nucleotide binding|GO:1901363,heterocyclic compound binding|GO:1901265,nucleoside phosphate binding|GO:0001882,nucleoside binding|GO:0043168,anion binding|GO:0019838,grow…	hsa03018,RNA degradation|hsa05152,Tuberculosis
P31689	3.48945	1.803	P31689	DNAJA1	GO:0043549,regulation of kinase activity|GO:0019220,regulation of phosphate metabolic process|GO:0080090,regulation of primary metabolic process|GO:0019222,regulation of metabolic process|GO:0051049,regulation of transport|GO:0048585,negative regulation of response to stimulus|GO:0048583,regulation of response to stimulus|GO:0008104,protein localization|GO:0042769,DNA damage response, detection o…	GO:0005783,endoplasmic reticulum|GO:0005789,endoplasmic reticulum membrane|GO:0042175,nuclear outer membrane-endoplasmic reticulum membrane network|GO:0043229,intracellular organelle|GO:0098552,side of membrane|GO:0043227,membrane-bounded organelle|GO:0043226,organelle|GO:0005737,cytoplasm|GO:0031982,vesicle|GO:0005634,nucleus|GO:0016020,membrane|GO:0005739,mitochondrion|GO:0031988,membrane-bound…	GO:0044389,ubiquitin-like protein ligase binding|GO:0035639,purine ribonucleoside triphosphate binding|GO:0031072,heat shock protein binding|GO:0019899,enzyme binding|GO:0005488,binding|GO:0001664,G-protein coupled receptor binding|GO:0000166,nucleotide binding|GO:1901363,heterocyclic compound binding|GO:1901265,nucleoside phosphate binding|GO:0001882,nucleoside binding|GO:0043168,anion binding|G…	hsa04141,Protein processing in endoplasmic reticulum
P27144	3.47497	1.797	P27144	AK4	GO:0009167,purine ribonucleoside monophosphate metabolic process|GO:0009165,nucleotide biosynthetic process|GO:0009163,nucleoside biosynthetic process|GO:0009161,ribonucleoside monophosphate metabolic process|GO:1901362,organic cyclic compound biosynthetic process|GO:0042451,purine nucleoside biosynthetic process|GO:0009168,purine ribonucleoside monophosphate biosynthetic process|GO:0044710,singl…	GO:0031974,membrane-enclosed lumen|GO:0043229,intracellular organelle|GO:0043227,membrane-bounded organelle|GO:0043226,organelle|GO:0005737,cytoplasm|GO:0070062,extracellular exosome|GO:0005739,mitochondrion|GO:0031988,membrane-bounded vesicle|GO:0005759,mitochondrial matrix|GO:1903561,extracellular vesicle|GO:0031982,vesicle|GO:0043230,extracellular organelle|GO:0043231,intracellular membrane-bo…	GO:0019201,nucleotide kinase activity|GO:0019205,nucleobase-containing compound kinase activity|GO:0035639,purine ribonucleoside triphosphate binding|GO:0004017,adenylate kinase activity|GO:0005488,binding|GO:0043167,ion binding|GO:1901363,heterocyclic compound binding|GO:0001883,purine nucleoside binding|GO:0001882,nucleoside binding|GO:0043168,anion binding|GO:0000166,nucleotide binding|GO:0032…	hsa00730,Thiamine metabolism|hsa01100,Metabolic pathways|hsa00230,Purine metabolism
Q5SSJ5	3.42713	1.777	Q5SSJ5	HP1BP3	GO:0009628,response to abiotic stimulus|GO:0080090,regulation of primary metabolic process|GO:0019222,regulation of metabolic process|GO:1901362,organic cyclic compound biosynthetic process|GO:1901360,organic cyclic compound metabolic process|GO:0051716,cellular response to stimulus|GO:0042127,regulation of cell proliferation|GO:0060255,regulation of macromolecule metabolic process|GO:0065004,pro…	GO:0044815,DNA packaging complex|GO:0043229,intracellular organelle|GO:0043228,non-membrane-bounded organelle|GO:0000785,chromatin|GO:0000786,nucleosome|GO:0043227,membrane-bounded organelle|GO:0043226,organelle|GO:0005634,nucleus|GO:0005694,chromosome|GO:0043234,protein complex|GO:0032991,macromolecular complex|GO:0043231,intracellular membrane-bounded organelle|GO:0043232,intracellular non-memb…	GO:0005515,protein binding|GO:0097159,organic cyclic compound binding|GO:0031491,nucleosome binding|GO:0044877,macromolecular complex binding|GO:0005488,binding|GO:0003676,nucleic acid binding|GO:0003677,DNA binding|GO:0032403,protein complex binding|GO:0003682,chromatin binding|GO:1901363,heterocyclic compound binding
P17050	3.41764	1.773	P17050	NAGA	GO:0016137,glycoside metabolic process|GO:0030149,sphingolipid catabolic process|GO:0016139,glycoside catabolic process|GO:0044248,cellular catabolic process|GO:0034641,cellular nitrogen compound metabolic process|GO:0006807,nitrogen compound metabolic process|GO:0044242,cellular lipid catabolic process|GO:0044699,single-organism process|GO:0006629,lipid metabolic process|GO:0044712,single-organi…	GO:0000323,lytic vacuole|GO:0043229,intracellular organelle|GO:0043227,membrane-bounded organelle|GO:0043226,organelle|GO:0005737,cytoplasm|GO:0031982,vesicle|GO:0005773,vacuole|GO:0031988,membrane-bounded vesicle|GO:1903561,extracellular vesicle|GO:0070062,extracellular exosome|GO:0043230,extracellular organelle|GO:0043231,intracellular membrane-bounded organelle|GO:0044464,cell part|GO:0005623,…	GO:0016787,hydrolase activity|GO:0015925,galactosidase activity|GO:0008456,alpha-N-acetylgalactosaminidase activity|GO:0016798,hydrolase activity, acting on glycosyl bonds|GO:0015929,hexosaminidase activity|GO:0003824,catalytic activity|GO:0004557,alpha-galactosidase activity|GO:0005488,binding|GO:0005515,protein binding|GO:0004553,hydrolase activity, hydrolyzing O-glycosyl compounds|GO:0046983,p…	hsa01100,Metabolic pathways|hsa04142,Lysosome|hsa00603,Glycosphingolipid biosynthesis - globo and isoglobo series
O43670	3.41054	1.77	O43670	ZNF207	GO:0080090,regulation of primary metabolic process|GO:0032434,regulation of proteasomal ubiquitin-dependent protein catabolic process|GO:0032435,negative regulation of proteasomal ubiquitin-dependent protein catabolic process|GO:0044257,cellular protein catabolic process|GO:0000280,nuclear division|GO:0010965,regulation of mitotic sister chromatid separation|GO:1901362,organic cyclic compound bio…	GO:0031974,membrane-enclosed lumen|GO:0043229,intracellular organelle|GO:0043228,non-membrane-bounded organelle|GO:0005874,microtubule|GO:0043226,organelle|GO:0005856,cytoskeleton|GO:0031981,nuclear lumen|GO:0005730,nucleolus|GO:0043227,membrane-bounded organelle|GO:0005634,nucleus|GO:0044430,cytoskeletal part|GO:0000776,kinetochore|GO:0005694,chromosome|GO:0015630,microtubule cytoskeleton|GO:000…	GO:0044877,macromolecular complex binding|GO:0008270,zinc ion binding|GO:0003676,nucleic acid binding|GO:0003677,DNA binding|GO:1901363,heterocyclic compound binding|GO:1901681,sulfur compound binding|GO:0043169,cation binding|GO:0046914,transition metal ion binding|GO:0043167,ion binding|GO:0032403,protein complex binding|GO:0046872,metal ion binding|GO:0044822,poly(A) RNA binding|GO:0043168,ani…
O94905	3.4011	1.766	O94905	ERLIN2	GO:0080090,regulation of primary metabolic process|GO:0019222,regulation of metabolic process|GO:0007165,signal transduction|GO:0044283,small molecule biosynthetic process|GO:1901576,organic substance biosynthetic process|GO:1901362,organic cyclic compound biosynthetic process|GO:1901360,organic cyclic compound metabolic process|GO:0044712,single-organism catabolic process|GO:0006984,ER-nucleus s…	GO:0005783,endoplasmic reticulum|GO:0044421,extracellular region part|GO:0005789,endoplasmic reticulum membrane|GO:0042175,nuclear outer membrane-endoplasmic reticulum membrane network|GO:0043229,intracellular organelle|GO:0071944,cell periphery|GO:0043227,membrane-bounded organelle|GO:0043226,organelle|GO:0031224,intrinsic component of membrane|GO:0005737,cytoplasm|GO:0031982,vesicle|GO:0016021,…	GO:0031625,ubiquitin protein ligase binding|GO:0044389,ubiquitin-like protein ligase binding|GO:0019899,enzyme binding|GO:0005488,binding|GO:0005515,protein binding|GO:0032934,sterol binding|GO:0015485,cholesterol binding|GO:0043178,alcohol binding|GO:0016773,phosphotransferase activity, alcohol group as acceptor|GO:0016772,transferase activity, transferring phosphorus-containing groups|GO:001630…
P51991	3.37292	1.754	P51991	HNRNPA3	GO:0015931,nucleobase-containing compound transport|GO:0090304,nucleic acid metabolic process|GO:0034641,cellular nitrogen compound metabolic process|GO:0006807,nitrogen compound metabolic process|GO:0044237,cellular metabolic process|GO:0051028,mRNA transport|GO:1901360,organic cyclic compound metabolic process|GO:0006139,nucleobase-containing compound metabolic process|GO:0044260,cellular macro…	GO:0035770,ribonucleoprotein granule|GO:0031974,membrane-enclosed lumen|GO:0043229,intracellular organelle|GO:0043228,non-membrane-bounded organelle|GO:0043227,membrane-bounded organelle|GO:0043226,organelle|GO:0005737,cytoplasm|GO:0031981,nuclear lumen|GO:0005634,nucleus|GO:0030529,intracellular ribonucleoprotein complex|GO:0005654,nucleoplasm|GO:0097458,neuron part|GO:0043005,neuron projection|…	GO:0022891,substrate-specific transmembrane transporter activity|GO:0015932,nucleobase-containing compound transmembrane transporter activity|GO:0022892,substrate-specific transporter activity|GO:0005515,protein binding|GO:0022884,macromolecule transmembrane transporter activity|GO:0005215,transporter activity|GO:0044822,poly(A) RNA binding|GO:0022857,transmembrane transporter activity|GO:0000166…	hsa03040,Spliceosome
O43143	3.35893	1.748	O43143	DHX15	GO:0016070,RNA metabolic process|GO:0016071,mRNA metabolic process|GO:0044238,primary metabolic process|GO:0044260,cellular macromolecule metabolic process|GO:0006139,nucleobase-containing compound metabolic process|GO:0009987,cellular process|GO:0006725,cellular aromatic compound metabolic process|GO:0010467,gene expression|GO:0044237,cellular metabolic process|GO:0043170,macromolecule metabolic…	GO:0071008,U2-type post-mRNA release spliceosomal complex|GO:0031974,membrane-enclosed lumen|GO:0043229,intracellular organelle|GO:0043228,non-membrane-bounded organelle|GO:0043227,membrane-bounded organelle|GO:0043226,organelle|GO:0005737,cytoplasm|GO:0031981,nuclear lumen|GO:0005730,nucleolus|GO:0005634,nucleus|GO:0030529,intracellular ribonucleoprotein complex|GO:0005654,nucleoplasm|GO:0071014…	GO:0016887,ATPase activity|GO:0008026,ATP-dependent helicase activity|GO:0035639,purine ribonucleoside triphosphate binding|GO:0005488,binding|GO:0003676,nucleic acid binding|GO:0008186,RNA-dependent ATPase activity|GO:0043167,ion binding|GO:1901363,heterocyclic compound binding|GO:0001883,purine nucleoside binding|GO:0001882,nucleoside binding|GO:0043168,anion binding|GO:0042623,ATPase activity,…	hsa03040,Spliceosome
Q53H12	3.33341	1.737	Q53H12	AGK	GO:0016310,phosphorylation|GO:0044249,cellular biosynthetic process|GO:0034641,cellular nitrogen compound metabolic process|GO:0006807,nitrogen compound metabolic process|GO:0046486,glycerolipid metabolic process|GO:0044699,single-organism process|GO:0006629,lipid metabolic process|GO:1901576,organic substance biosynthetic process|GO:0044710,single-organism metabolic process|GO:0044711,single-org…	GO:0005737,cytoplasm|GO:0005622,intracellular|GO:0043231,intracellular membrane-bounded organelle|GO:0005623,cell|GO:0043227,membrane-bounded organelle|GO:0016020,membrane|GO:0044444,cytoplasmic part|GO:0043229,intracellular organelle|GO:0005739,mitochondrion|GO:0031966,mitochondrial membrane|GO:0044446,intracellular organelle part|GO:0005740,mitochondrial envelope|GO:0044429,mitochondrial part|G…	GO:0035639,purine ribonucleoside triphosphate binding|GO:0047620,acylglycerol kinase activity|GO:0005488,binding|GO:0043167,ion binding|GO:1901363,heterocyclic compound binding|GO:0001883,purine nucleoside binding|GO:0001882,nucleoside binding|GO:0043168,anion binding|GO:0001727,lipid kinase activity|GO:0001729,ceramide kinase activity|GO:0000166,nucleotide binding|GO:0016740,transferase activity…	hsa00561,Glycerolipid metabolism|hsa01100,Metabolic pathways
Q13620	3.31268	1.728	Q13620	CUL4B	GO:0080090,regulation of primary metabolic process|GO:0019222,regulation of metabolic process|GO:0010390,histone monoubiquitination|GO:0048468,cell development|GO:0042769,DNA damage response, detection of DNA damage|GO:1901576,organic substance biosynthetic process|GO:1901362,organic cyclic compound biosynthetic process|GO:0071840,cellular component organization or biogenesis|GO:0044710,single-or…	GO:0031974,membrane-enclosed lumen|GO:0043229,intracellular organelle|GO:0071944,cell periphery|GO:0043227,membrane-bounded organelle|GO:0043226,organelle|GO:0005737,cytoplasm|GO:0070062,extracellular exosome|GO:0031981,nuclear lumen|GO:0005634,nucleus|GO:0016020,membrane|GO:0031988,membrane-bounded vesicle|GO:0005654,nucleoplasm|GO:0032991,macromolecular complex|GO:1902494,catalytic complex|GO:1…	GO:0019787,ubiquitin-like protein transferase activity|GO:0031625,ubiquitin protein ligase binding|GO:0044389,ubiquitin-like protein ligase binding|GO:0005515,protein binding|GO:0061630,ubiquitin protein ligase activity|GO:0019899,enzyme binding|GO:1901363,heterocyclic compound binding|GO:0003824,catalytic activity|GO:0016740,transferase activity|GO:0005488,binding|GO:0003676,nucleic acid binding…	hsa04120,Ubiquitin mediated proteolysis|hsa05170,Human immunodeficiency virus 1 infection|hsa03420,Nucleotide excision repair
P62911	3.27615	1.712	P62911	P62911
O94776	3.24676	1.699	O94776	MTA2	GO:0080090,regulation of primary metabolic process|GO:0019222,regulation of metabolic process|GO:0006476,protein deacetylation|GO:1901362,organic cyclic compound biosynthetic process|GO:0071840,cellular component organization or biogenesis|GO:0006306,DNA methylation|GO:0044710,single-organism metabolic process|GO:0006304,DNA modification|GO:0010605,negative regulation of macromolecule metabolic p…	GO:0031974,membrane-enclosed lumen|GO:0043229,intracellular organelle|GO:0043228,non-membrane-bounded organelle|GO:0000785,chromatin|GO:0000228,nuclear chromosome|GO:0043227,membrane-bounded organelle|GO:0043226,organelle|GO:0070603,SWI/SNF superfamily-type complex|GO:0031981,nuclear lumen|GO:0005634,nucleus|GO:0016020,membrane|GO:0005654,nucleoplasm|GO:0044454,nuclear chromosome part|GO:0044451,…	GO:0001012,RNA polymerase II regulatory region DNA binding|GO:0001159,core promoter proximal region DNA binding|GO:0001158,enhancer sequence-specific DNA binding|GO:0031491,nucleosome binding|GO:0031490,chromatin DNA binding|GO:0031492,nucleosomal DNA binding|GO:0044877,macromolecular complex binding|GO:0008270,zinc ion binding|GO:0003676,nucleic acid binding|GO:0003677,DNA binding|GO:1901363,het…
B4E2U0	3.22657	1.69	B4E2U0	B4E2U0	GO:0006739,NADP metabolic process|GO:0006732,coenzyme metabolic process|GO:0006733,oxidoreduction coenzyme metabolic process|GO:0019752,carboxylic acid metabolic process|GO:0043436,oxoacid metabolic process|GO:0034641,cellular nitrogen compound metabolic process|GO:0006098,pentose-phosphate shunt|GO:0046496,nicotinamide nucleotide metabolic process|GO:0072524,pyridine-containing compound metaboli…		GO:0016614,oxidoreductase activity, acting on CH-OH group of donors|GO:0016616,oxidoreductase activity, acting on the CH-OH group of donors, NAD or NADP as acceptor|GO:0003824,catalytic activity|GO:0004616,phosphogluconate dehydrogenase (decarboxylating) activity|GO:0016491,oxidoreductase activity
P45880	3.22433	1.689	P45880	VDAC2	GO:2001234,negative regulation of apoptotic signaling pathway|GO:0022607,cellular component assembly|GO:0006461,protein complex assembly|GO:0051234,establishment of localization|GO:2001233,regulation of apoptotic signaling pathway|GO:0043933,macromolecular complex subunit organization|GO:0051049,regulation of transport|GO:0048585,negative regulation of response to stimulus|GO:0034622,cellular mac…	GO:0098796,membrane protein complex|GO:0044421,extracellular region part|GO:0044464,cell part|GO:0031974,membrane-enclosed lumen|GO:0031975,envelope|GO:0043229,intracellular organelle|GO:0043228,non-membrane-bounded organelle|GO:0042645,mitochondrial nucleoid|GO:0043227,membrane-bounded organelle|GO:0043226,organelle|GO:0031224,intrinsic component of membrane|GO:0005737,cytoplasm|GO:0046930,pore …	GO:0015288,porin activity|GO:0005488,binding|GO:0022838,substrate-specific channel activity|GO:1901363,heterocyclic compound binding|GO:1901265,nucleoside phosphate binding|GO:0008509,anion transmembrane transporter activity|GO:0000166,nucleotide binding|GO:0022829,wide pore channel activity|GO:0022803,passive transmembrane transporter activity|GO:0005253,anion channel activity|GO:0005215,transpo…	hsa04022,cGMP-PKG signaling pathway|hsa04979,Cholesterol metabolism|hsa04020,Calcium signaling pathway|hsa04621,NOD-like receptor signaling pathway|hsa04218,Cellular senescence|hsa05012,Parkinson disease|hsa05016,Huntington disease|hsa05166,Human T-cell leukemia virus 1 infection|hsa04217,Necroptosis|hsa04216,Ferroptosis
P60174	3.19541	1.676	P60174	TPI1	GO:0009167,purine ribonucleoside monophosphate metabolic process|GO:0061621,canonical glycolysis|GO:0061620,glycolytic process through glucose-6-phosphate|GO:0044281,small molecule metabolic process|GO:0009161,ribonucleoside monophosphate metabolic process|GO:1901360,organic cyclic compound metabolic process|GO:0044712,single-organism catabolic process|GO:0044710,single-organism metabolic process…	GO:0043229,intracellular organelle|GO:0043227,membrane-bounded organelle|GO:0043226,organelle|GO:0005737,cytoplasm|GO:0031982,vesicle|GO:0005634,nucleus|GO:0031988,membrane-bounded vesicle|GO:1903561,extracellular vesicle|GO:0005615,extracellular space|GO:0043230,extracellular organelle|GO:0043231,intracellular membrane-bounded organelle|GO:0070062,extracellular exosome|GO:0005829,cytosol|GO:0044…	GO:0031625,ubiquitin protein ligase binding|GO:0044389,ubiquitin-like protein ligase binding|GO:0016853,isomerase activity|GO:0019899,enzyme binding|GO:0003824,catalytic activity|GO:0005488,binding|GO:0005515,protein binding|GO:0016860,intramolecular oxidoreductase activity|GO:0016861,intramolecular oxidoreductase activity, interconverting aldoses and ketoses|GO:0004807,triose-phosphate isomerase…	hsa00562,Inositol phosphate metabolism|hsa01100,Metabolic pathways|hsa01200,Carbon metabolism|hsa00051,Fructose and mannose metabolism|hsa01230,Biosynthesis of amino acids|hsa00010,Glycolysis / Gluconeogenesis
Q08380	3.18877	1.673	Q08380	LGALS3BP	GO:0006968,cellular defense response|GO:0023052,signaling|GO:0007165,signal transduction|GO:0050789,regulation of biological process|GO:0044699,single-organism process|GO:0051716,cellular response to stimulus|GO:0065007,biological regulation|GO:0022610,biological adhesion|GO:0006810,transport|GO:0009987,cellular process|GO:0050794,regulation of cellular process|GO:0006952,defense response|GO:0006…	GO:0043230,extracellular organelle|GO:0070062,extracellular exosome|GO:0044421,extracellular region part|GO:0043227,membrane-bounded organelle|GO:0016020,membrane|GO:0072562,blood microparticle|GO:0031012,extracellular matrix|GO:0043226,organelle|GO:0005576,extracellular region|GO:0005615,extracellular space|GO:0031988,membrane-bounded vesicle|GO:1903561,extracellular vesicle|GO:0065010,extracell…	GO:0005044,scavenger receptor activity|GO:0038024,cargo receptor activity|GO:0004872,receptor activity|GO:0060089,molecular transducer activity|GO:0005488,binding|GO:0005515,protein binding
V9HW95	3.16674	1.663	V9HW95	HEL-S-84		GO:0005737,cytoplasm|GO:0005783,endoplasmic reticulum|GO:0044464,cell part|GO:0043229,intracellular organelle|GO:0005623,cell|GO:0005622,intracellular|GO:0044444,cytoplasmic part|GO:0012505,endomembrane system|GO:0044424,intracellular part|GO:0043227,membrane-bounded organelle|GO:0043226,organelle|GO:0043231,intracellular membrane-bounded organelle	GO:0043169,cation binding|GO:0043167,ion binding|GO:0005488,binding|GO:0046872,metal ion binding|GO:0005509,calcium ion binding
P60900	3.16455	1.662	P60900	PSMA6	GO:0080090,regulation of primary metabolic process|GO:0019222,regulation of metabolic process|GO:0002479,antigen processing and presentation of exogenous peptide antigen via MHC class I, TAP-dependent|GO:0048585,negative regulation of response to stimulus|GO:0048584,positive regulation of response to stimulus|GO:0048583,regulation of response to stimulus|GO:0031349,positive regulation of defense …	GO:0035770,ribonucleoprotein granule|GO:0019773,proteasome core complex, alpha-subunit complex|GO:0031974,membrane-enclosed lumen|GO:0030016,myofibril|GO:0030017,sarcomere|GO:0043229,intracellular organelle|GO:0043228,non-membrane-bounded organelle|GO:0036464,cytoplasmic ribonucleoprotein granule|GO:0030529,intracellular ribonucleoprotein complex|GO:0043227,membrane-bounded organelle|GO:0043226,o…	GO:0043168,anion binding|GO:0016787,hydrolase activity|GO:0004175,endopeptidase activity|GO:0005515,protein binding|GO:0035639,purine ribonucleoside triphosphate binding|GO:0097159,organic cyclic compound binding|GO:0008134,transcription factor binding|GO:0051059,NF-kappaB binding|GO:0004298,threonine-type endopeptidase activity|GO:0003824,catalytic activity|GO:0070003,threonine-type peptidase ac…	hsa03050,Proteasome
A0A7I2V621	3.13616	1.649	A0A7I2V621	A0A7I2V621	GO:0080090,regulation of primary metabolic process|GO:0019222,regulation of metabolic process|GO:0031323,regulation of cellular metabolic process|GO:0090304,nucleic acid metabolic process|GO:0034641,cellular nitrogen compound metabolic process|GO:0006807,nitrogen compound metabolic process|GO:0043170,macromolecule metabolic process|GO:0050789,regulation of biological process|GO:1901360,organic cy…	GO:0043231,intracellular membrane-bounded organelle|GO:0005634,nucleus|GO:0044464,cell part|GO:0005623,cell|GO:0005622,intracellular|GO:0043229,intracellular organelle|GO:0044424,intracellular part|GO:0043227,membrane-bounded organelle|GO:0043226,organelle	GO:0097159,organic cyclic compound binding|GO:0005488,binding|GO:0003676,nucleic acid binding|GO:1901363,heterocyclic compound binding|GO:0003723,RNA binding
A0A0K0K1K7	3.10157	1.633	A0A0K0K1K7	HEL-S-304	GO:0006739,NADP metabolic process|GO:0006732,coenzyme metabolic process|GO:0006733,oxidoreduction coenzyme metabolic process|GO:0034641,cellular nitrogen compound metabolic process|GO:0006098,pentose-phosphate shunt|GO:0046496,nicotinamide nucleotide metabolic process|GO:0072524,pyridine-containing compound metabolic process|GO:0044699,single-organism process|GO:0006139,nucleobase-containing comp…		GO:0016787,hydrolase activity|GO:0017057,6-phosphogluconolactonase activity|GO:0016788,hydrolase activity, acting on ester bonds|GO:0003824,catalytic activity|GO:0052689,carboxylic ester hydrolase activity
B3KU66	3.06524	1.616	B3KU66	B3KU66			GO:0035639,purine ribonucleoside triphosphate binding|GO:0005488,binding|GO:0000166,nucleotide binding|GO:1901363,heterocyclic compound binding|GO:1901265,nucleoside phosphate binding|GO:0043168,anion binding|GO:0043167,ion binding|GO:0017076,purine nucleotide binding|GO:0005524,ATP binding|GO:0016787,hydrolase activity|GO:0017111,nucleoside-triphosphatase activity|GO:0004386,helicase activity|GO…
Q9BRL6	3.06524	1.616	Q9BRL6	SRSF8	GO:0016070,RNA metabolic process|GO:0016071,mRNA metabolic process|GO:0044238,primary metabolic process|GO:0044260,cellular macromolecule metabolic process|GO:0006139,nucleobase-containing compound metabolic process|GO:0009987,cellular process|GO:0006725,cellular aromatic compound metabolic process|GO:0010467,gene expression|GO:0044237,cellular metabolic process|GO:0043170,macromolecule metabolic…	GO:0043231,intracellular membrane-bounded organelle|GO:0005634,nucleus|GO:0044464,cell part|GO:0005623,cell|GO:0005622,intracellular|GO:0043229,intracellular organelle|GO:0044424,intracellular part|GO:0043227,membrane-bounded organelle|GO:0043226,organelle|GO:0031974,membrane-enclosed lumen|GO:0016607,nuclear speck|GO:0016604,nuclear body|GO:0031981,nuclear lumen|GO:0005654,nucleoplasm|GO:0044451…	GO:0005515,protein binding|GO:0097159,organic cyclic compound binding|GO:0044822,poly(A) RNA binding|GO:0000166,nucleotide binding|GO:0036094,small molecule binding|GO:0003723,RNA binding|GO:0003676,nucleic acid binding|GO:1901363,heterocyclic compound binding|GO:1901265,nucleoside phosphate binding|GO:0005488,binding	hsa05168,Herpes simplex virus 1 infection|hsa03040,Spliceosome
Q9UHD8	3.05463	1.611	Q9UHD8	SEPTIN9	GO:0051259,protein oligomerization|GO:0007049,cell cycle|GO:0022607,cellular component assembly|GO:0071822,protein complex subunit organization|GO:0070271,protein complex biogenesis|GO:0043933,macromolecular complex subunit organization|GO:0071840,cellular component organization or biogenesis|GO:0006461,protein complex assembly|GO:0051291,protein heterooligomerization|GO:0016043,cellular componen…	GO:0032432,actin filament bundle|GO:0015629,actin cytoskeleton|GO:0043229,intracellular organelle|GO:0043228,non-membrane-bounded organelle|GO:0005874,microtubule|GO:0043226,organelle|GO:0042641,actomyosin|GO:0005856,cytoskeleton|GO:0001725,stress fiber|GO:0044430,cytoskeletal part|GO:0048471,perinuclear region of cytoplasm|GO:0005737,cytoplasm|GO:0015630,microtubule cytoskeleton|GO:0043234,prote…	GO:0035639,purine ribonucleoside triphosphate binding|GO:0005488,binding|GO:0043167,ion binding|GO:1901363,heterocyclic compound binding|GO:1901265,nucleoside phosphate binding|GO:0001882,nucleoside binding|GO:0043168,anion binding|GO:0016462,pyrophosphatase activity|GO:0000166,nucleotide binding|GO:0032561,guanyl ribonucleotide binding|GO:0001883,purine nucleoside binding|GO:0032549,ribonucleosi…	hsa05100,Bacterial invasion of epithelial cells
Q9Y2W1	3.05252	1.61	Q9Y2W1	THRAP3	GO:0080090,regulation of primary metabolic process|GO:0019222,regulation of metabolic process|GO:0050685,positive regulation of mRNA processing|GO:0050684,regulation of mRNA processing|GO:2001141,regulation of RNA biosynthetic process|GO:0007165,signal transduction|GO:1901362,organic cyclic compound biosynthetic process|GO:1901360,organic cyclic compound metabolic process|GO:1901361,organic cycli…	GO:0035145,exon-exon junction complex|GO:0031974,membrane-enclosed lumen|GO:0043229,intracellular organelle|GO:0016592,mediator complex|GO:0043227,membrane-bounded organelle|GO:0043226,organelle|GO:0070062,extracellular exosome|GO:0031981,nuclear lumen|GO:0005634,nucleus|GO:0031988,membrane-bounded vesicle|GO:0005654,nucleoplasm|GO:0044451,nucleoplasm part|GO:0032991,macromolecular complex|GO:190…	GO:0017076,purine nucleotide binding|GO:0035639,purine ribonucleoside triphosphate binding|GO:0060089,molecular transducer activity|GO:0001104,RNA polymerase II transcription cofactor activity|GO:0004872,receptor activity|GO:0003676,nucleic acid binding|GO:0003677,DNA binding|GO:0043167,ion binding|GO:1901363,heterocyclic compound binding|GO:0001883,purine nucleoside binding|GO:0001882,nucleoside…
Q99798	3.03564	1.602	Q99798	ACO2	GO:0019752,carboxylic acid metabolic process|GO:0006099,tricarboxylic acid cycle|GO:0009060,aerobic respiration|GO:0044281,small molecule metabolic process|GO:0006091,generation of precursor metabolites and energy|GO:0072350,tricarboxylic acid metabolic process|GO:0044699,single-organism process|GO:0044710,single-organism metabolic process|GO:0071704,organic substance metabolic process|GO:0045333…	GO:0005737,cytoplasm|GO:0043231,intracellular membrane-bounded organelle|GO:0043233,organelle lumen|GO:0043209,myelin sheath|GO:0005634,nucleus|GO:0044464,cell part|GO:0044444,cytoplasmic part|GO:0031974,membrane-enclosed lumen|GO:0005622,intracellular|GO:0044446,intracellular organelle part|GO:0070013,intracellular organelle lumen|GO:0043229,intracellular organelle|GO:0005739,mitochondrion|GO:00…	GO:0043169,cation binding|GO:0051538,3 iron, 4 sulfur cluster binding|GO:0051539,4 iron, 4 sulfur cluster binding|GO:0046914,transition metal ion binding|GO:0016835,carbon-oxygen lyase activity|GO:0016836,hydro-lyase activity|GO:0043167,ion binding|GO:0003824,catalytic activity|GO:0005488,binding|GO:0051536,iron-sulfur cluster binding|GO:0003994,aconitate hydratase activity|GO:0005506,iron ion bi…	hsa01100,Metabolic pathways|hsa00630,Glyoxylate and dicarboxylate metabolism|hsa01200,Carbon metabolism|hsa00020,Citrate cycle (TCA cycle)|hsa01230,Biosynthesis of amino acids|hsa01210,2-Oxocarboxylic acid metabolism
P18859	2.98763	1.579	P18859	ATP5PF	GO:0009167,purine ribonucleoside monophosphate metabolic process|GO:0009165,nucleotide biosynthetic process|GO:0009163,nucleoside biosynthetic process|GO:0009161,ribonucleoside monophosphate metabolic process|GO:1901362,organic cyclic compound biosynthetic process|GO:0042451,purine nucleoside biosynthetic process|GO:0009168,purine ribonucleoside monophosphate biosynthetic process|GO:0044710,singl…	GO:0044464,cell part|GO:0031975,envelope|GO:0043229,intracellular organelle|GO:0043227,membrane-bounded organelle|GO:0043226,organelle|GO:0005737,cytoplasm|GO:0045263,proton-transporting ATP synthase complex, coupling factor F(o)|GO:0031090,organelle membrane|GO:0098796,membrane protein complex|GO:0016020,membrane|GO:0044444,cytoplasmic part|GO:0005739,mitochondrion|GO:0098800,inner mitochondrial…	GO:0022891,substrate-specific transmembrane transporter activity|GO:0022890,inorganic cation transmembrane transporter activity|GO:0016818,hydrolase activity, acting on acid anhydrides, in phosphorus-containing anhydrides|GO:0022892,substrate-specific transporter activity|GO:0016787,hydrolase activity|GO:0005215,transporter activity|GO:0003824,catalytic activity|GO:0008324,cation transmembrane tr…	hsa00190,Oxidative phosphorylation|hsa04714,Thermogenesis|hsa01100,Metabolic pathways|hsa05016,Huntington disease|hsa05010,Alzheimer disease|hsa05012,Parkinson disease
Q9Y277	2.97111	1.571	Q9Y277	VDAC3	GO:0022604,regulation of cell morphogenesis|GO:0022607,cellular component assembly|GO:0015853,adenine transport|GO:0015851,nucleobase transport|GO:0033043,regulation of organelle organization|GO:0030030,cell projection organization|GO:0051049,regulation of transport|GO:0006863,purine nucleobase transport|GO:0051128,regulation of cellular component organization|GO:0060491,regulation of cell projec…	GO:0044421,extracellular region part|GO:0031975,envelope|GO:0043229,intracellular organelle|GO:0043227,membrane-bounded organelle|GO:0043226,organelle|GO:0031224,intrinsic component of membrane|GO:0005737,cytoplasm|GO:0046930,pore complex|GO:0031982,vesicle|GO:0005634,nucleus|GO:0016020,membrane|GO:0044444,cytoplasmic part|GO:0005739,mitochondrion|GO:0031988,membrane-bounded vesicle|GO:0005576,ex…	GO:0015288,porin activity|GO:0005488,binding|GO:0022838,substrate-specific channel activity|GO:1901363,heterocyclic compound binding|GO:1901265,nucleoside phosphate binding|GO:0008509,anion transmembrane transporter activity|GO:0000166,nucleotide binding|GO:0022829,wide pore channel activity|GO:0022803,passive transmembrane transporter activity|GO:0005253,anion channel activity|GO:0005215,transpo…	hsa04022,cGMP-PKG signaling pathway|hsa04979,Cholesterol metabolism|hsa04020,Calcium signaling pathway|hsa04621,NOD-like receptor signaling pathway|hsa05203,Viral carcinogenesis|hsa04218,Cellular senescence|hsa05166,Human T-cell leukemia virus 1 infection|hsa05012,Parkinson disease|hsa05016,Huntington disease|hsa05161,Hepatitis B|hsa04217,Necroptosis|hsa04216,Ferroptosis
P30626	2.96905	1.57	P30626	SRI	GO:0035774,positive regulation of insulin secretion involved in cellular response to glucose stimulus|GO:0032024,positive regulation of insulin secretion|GO:0051169,nuclear transport|GO:0044238,primary metabolic process|GO:0032388,positive regulation of intracellular transport|GO:1903779,regulation of cardiac conduction|GO:0035773,insulin secretion involved in cellular response to glucose stimulu…	GO:0042995,cell projection|GO:0005783,endoplasmic reticulum|GO:0044421,extracellular region part|GO:0044424,intracellular part|GO:0043679,axon terminus|GO:0043232,intracellular non-membrane-bounded organelle|GO:0031974,membrane-enclosed lumen|GO:0005789,endoplasmic reticulum membrane|GO:0030016,myofibril|GO:0030017,sarcomere|GO:0043229,intracellular organelle|GO:0043228,non-membrane-bounded organ…	GO:0004175,endopeptidase activity|GO:0019899,enzyme binding|GO:0005488,binding|GO:0044325,ion channel binding|GO:0098772,molecular function regulator|GO:0008233,peptidase activity|GO:0070491,repressing transcription factor binding|GO:0043169,cation binding|GO:0043167,ion binding|GO:0004197,cysteine-type endopeptidase activity|GO:0005509,calcium ion binding|GO:0002020,protease binding|GO:0016247,c…
O75822	2.9465	1.559	O75822	EIF3J	GO:0022607,cellular component assembly|GO:0080090,regulation of primary metabolic process|GO:0019222,regulation of metabolic process|GO:0043933,macromolecular complex subunit organization|GO:2000112,regulation of cellular macromolecule biosynthetic process|GO:0031323,regulation of cellular metabolic process|GO:0044249,cellular biosynthetic process|GO:0034641,cellular nitrogen compound metabolic p…	GO:0043234,protein complex|GO:0005737,cytoplasm|GO:0005852,eukaryotic translation initiation factor 3 complex|GO:0016282,eukaryotic 43S preinitiation complex|GO:0005829,cytosol|GO:0070993,translation preinitiation complex|GO:0005623,cell|GO:0030529,intracellular ribonucleoprotein complex|GO:0044444,cytoplasmic part|GO:0044424,intracellular part|GO:0033290,eukaryotic 48S preinitiation complex|GO:0…	GO:0005488,binding|GO:0003676,nucleic acid binding|GO:0097159,organic cyclic compound binding|GO:0008135,translation factor activity, RNA binding|GO:0003723,RNA binding|GO:0005515,protein binding|GO:1901363,heterocyclic compound binding|GO:0003743,translation initiation factor activity	hsa03013,RNA transport
Q13404	2.9302	1.551	Q13404	UBE2V1	GO:0080090,regulation of primary metabolic process|GO:0019222,regulation of metabolic process|GO:0048584,positive regulation of response to stimulus|GO:0048583,regulation of response to stimulus|GO:0031349,positive regulation of defense response|GO:0007165,signal transduction|GO:0007166,cell surface receptor signaling pathway|GO:1901362,organic cyclic compound biosynthetic process|GO:0031347,regu…	GO:0035370,UBC13-UEV1A complex|GO:0043229,intracellular organelle|GO:0043227,membrane-bounded organelle|GO:0043226,organelle|GO:0005737,cytoplasm|GO:0031982,vesicle|GO:0005634,nucleus|GO:0031988,membrane-bounded vesicle|GO:1902494,catalytic complex|GO:1990234,transferase complex|GO:0032991,macromolecular complex|GO:1903561,extracellular vesicle|GO:0031371,ubiquitin conjugating enzyme complex|GO:0…	GO:0019787,ubiquitin-like protein transferase activity|GO:0031624,ubiquitin conjugating enzyme binding|GO:0031625,ubiquitin protein ligase binding|GO:0044389,ubiquitin-like protein ligase binding|GO:0005515,protein binding|GO:0061630,ubiquitin protein ligase activity|GO:0044390,ubiquitin-like protein conjugating enzyme binding|GO:0003824,catalytic activity|GO:0016740,transferase activity|GO:00198…
Q04726	2.9302	1.551	Q04726	TLE3	GO:0051252,regulation of RNA metabolic process|GO:0080090,regulation of primary metabolic process|GO:0019222,regulation of metabolic process|GO:0031326,regulation of cellular biosynthetic process|GO:0031323,regulation of cellular metabolic process|GO:0090304,nucleic acid metabolic process|GO:0044249,cellular biosynthetic process|GO:0034641,cellular nitrogen compound metabolic process|GO:0006807,n…	GO:0044446,intracellular organelle part|GO:0043231,intracellular membrane-bounded organelle|GO:0031981,nuclear lumen|GO:0043233,organelle lumen|GO:0005634,nucleus|GO:0044464,cell part|GO:0031974,membrane-enclosed lumen|GO:0005622,intracellular|GO:0005654,nucleoplasm|GO:0070013,intracellular organelle lumen|GO:0043229,intracellular organelle|GO:0044428,nuclear part|GO:0005623,cell|GO:0044424,intra…	GO:0005488,binding|GO:0005515,protein binding|GO:0008134,transcription factor binding|GO:0003714,transcription corepressor activity|GO:0003712,transcription cofactor activity|GO:0140110,transcription regulator activity|GO:0070491,repressing transcription factor binding
P56545	2.91804	1.545	P56545	CTBP2	GO:0080090,regulation of primary metabolic process|GO:0019222,regulation of metabolic process|GO:0048584,positive regulation of response to stimulus|GO:0048583,regulation of response to stimulus|GO:0007165,signal transduction|GO:1901362,organic cyclic compound biosynthetic process|GO:1901360,organic cyclic compound metabolic process|GO:0044710,single-organism metabolic process|GO:0010605,negative…	GO:0043234,protein complex|GO:0032991,macromolecular complex|GO:0043231,intracellular membrane-bounded organelle|GO:0017053,transcriptional repressor complex|GO:0005634,nucleus|GO:0044464,cell part|GO:0005623,cell|GO:0005622,intracellular|GO:0043229,intracellular organelle|GO:0097470,ribbon synapse|GO:0045202,synapse|GO:0044424,intracellular part|GO:0043227,membrane-bounded organelle|GO:0043226,o…	GO:0051287,NAD binding|GO:0044877,macromolecular complex binding|GO:0005488,binding|GO:1901363,heterocyclic compound binding|GO:1901265,nucleoside phosphate binding|GO:0016491,oxidoreductase activity|GO:0050662,coenzyme binding|GO:0003714,transcription corepressor activity|GO:0003713,transcription coactivator activity|GO:0003712,transcription cofactor activity|GO:0000166,nucleotide binding|GO:000…	hsa04330,Notch signaling pathway|hsa04310,Wnt signaling pathway|hsa05200,Pathways in cancer|hsa05220,Chronic myeloid leukemia
Q9BW27	2.91602	1.544	Q9BW27	NUP85	GO:0008104,protein localization|GO:0019221,cytokine-mediated signaling pathway|GO:0051049,regulation of transport|GO:0034605,cellular response to heat|GO:0048583,regulation of response to stimulus|GO:0009408,response to heat|GO:0061024,membrane organization|GO:0007165,signal transduction|GO:0007166,cell surface receptor signaling pathway|GO:0060326,cell chemotaxis|GO:1901362,organic cyclic compou…	GO:0016020,membrane|GO:0043232,intracellular non-membrane-bounded organelle|GO:0031975,envelope|GO:0043229,intracellular organelle|GO:0043228,non-membrane-bounded organelle|GO:0043227,membrane-bounded organelle|GO:0043226,organelle|GO:0031224,intrinsic component of membrane|GO:0005856,cytoskeleton|GO:0005819,spindle|GO:0046930,pore complex|GO:0031090,organelle membrane|GO:0005634,nucleus|GO:00056…	GO:0005488,binding|GO:0005515,protein binding|GO:0017056,structural constituent of nuclear pore|GO:0005198,structural molecule activity	hsa03013,RNA transport
P13797	2.90795	1.54	P13797	PLS3	GO:0032502,developmental process|GO:0032501,multicellular organismal process|GO:0044707,single-multicellular organism process|GO:0048856,anatomical structure development|GO:0060348,bone development|GO:0044767,single-organism developmental process|GO:0001501,skeletal system development|GO:0048513,animal organ development|GO:0048731,system development|GO:0007275,multicellular organism development|G…	GO:0005737,cytoplasm|GO:0044464,cell part|GO:0005623,cell|GO:0005622,intracellular|GO:0044424,intracellular part|GO:0032432,actin filament bundle|GO:0099512,supramolecular fiber|GO:0099513,polymeric cytoskeletal fiber|GO:0043229,intracellular organelle|GO:0071944,cell periphery|GO:0043226,organelle|GO:0015629,actin cytoskeleton|GO:0005856,cytoskeleton|GO:0016020,membrane|GO:0044430,cytoskeletal p…	GO:0043169,cation binding|GO:0008092,cytoskeletal protein binding|GO:0043167,ion binding|GO:0003779,actin binding|GO:0005509,calcium ion binding|GO:0005515,protein binding|GO:0046872,metal ion binding|GO:0005488,binding|GO:0051015,actin filament binding|GO:0044877,macromolecular complex binding|GO:0032403,protein complex binding
O75390	2.88986	1.531	O75390	CS	GO:0019752,carboxylic acid metabolic process|GO:0006099,tricarboxylic acid cycle|GO:0009060,aerobic respiration|GO:0044281,small molecule metabolic process|GO:0006091,generation of precursor metabolites and energy|GO:0072350,tricarboxylic acid metabolic process|GO:0044699,single-organism process|GO:0044710,single-organism metabolic process|GO:0044262,cellular carbohydrate metabolic process|GO:007…	GO:0031974,membrane-enclosed lumen|GO:0043229,intracellular organelle|GO:0043227,membrane-bounded organelle|GO:0043226,organelle|GO:0005737,cytoplasm|GO:0070062,extracellular exosome|GO:0005634,nucleus|GO:0005739,mitochondrion|GO:0031988,membrane-bounded vesicle|GO:0005759,mitochondrial matrix|GO:1903561,extracellular vesicle|GO:0031982,vesicle|GO:0043230,extracellular organelle|GO:0043231,intrac…	GO:0046912,transferase activity, transferring acyl groups, acyl groups converted into alkyl on transfer|GO:0004108,citrate (Si)-synthase activity|GO:0097159,organic cyclic compound binding|GO:0044822,poly(A) RNA binding|GO:0036440,citrate synthase activity|GO:0003824,catalytic activity|GO:0016740,transferase activity|GO:0016746,transferase activity, transferring acyl groups|GO:0003723,RNA binding…	hsa01100,Metabolic pathways|hsa00630,Glyoxylate and dicarboxylate metabolism|hsa01200,Carbon metabolism|hsa00020,Citrate cycle (TCA cycle)|hsa01230,Biosynthesis of amino acids|hsa01210,2-Oxocarboxylic acid metabolism
B4DNW0	2.88786	1.53	B4DNW0	B4DNW0	GO:0044238,primary metabolic process|GO:0044710,single-organism metabolic process|GO:0009987,cellular process|GO:1901564,organonitrogen compound metabolic process|GO:0006082,organic acid metabolic process|GO:0044237,cellular metabolic process|GO:0006520,cellular amino acid metabolic process|GO:0019752,carboxylic acid metabolic process|GO:0071704,organic substance metabolic process|GO:0006807,nitr…	GO:0005737,cytoplasm|GO:0044464,cell part|GO:0005623,cell|GO:0005622,intracellular|GO:0044424,intracellular part	GO:0004046,aminoacylase activity|GO:0016787,hydrolase activity|GO:0016810,hydrolase activity, acting on carbon-nitrogen (but not peptide) bonds|GO:0016811,hydrolase activity, acting on carbon-nitrogen (but not peptide) bonds, in linear amides|GO:0003824,catalytic activity|GO:0070011,peptidase activity, acting on L-amino acid peptides|GO:0008233,peptidase activity|GO:0008237,metallopeptidase activ…
P24539	2.84415	1.508	P24539	ATP5PB	GO:0009167,purine ribonucleoside monophosphate metabolic process|GO:0009165,nucleotide biosynthetic process|GO:0009163,nucleoside biosynthetic process|GO:0009161,ribonucleoside monophosphate metabolic process|GO:1901362,organic cyclic compound biosynthetic process|GO:0042451,purine nucleoside biosynthetic process|GO:0009168,purine ribonucleoside monophosphate biosynthetic process|GO:0044710,singl…	GO:0098796,membrane protein complex|GO:0044464,cell part|GO:0031974,membrane-enclosed lumen|GO:0031975,envelope|GO:0043229,intracellular organelle|GO:0031988,membrane-bounded vesicle|GO:0043227,membrane-bounded organelle|GO:0043226,organelle|GO:0005737,cytoplasm|GO:0005654,nucleoplasm|GO:0045263,proton-transporting ATP synthase complex, coupling factor F(o)|GO:0070062,extracellular exosome|GO:003…	GO:0005488,binding|GO:0016887,ATPase activity|GO:0042625,ATPase coupled ion transmembrane transporter activity|GO:0042626,ATPase activity, coupled to transmembrane movement of substances|GO:0016820,hydrolase activity, acting on acid anhydrides, catalyzing transmembrane movement of substances|GO:0046933,proton-transporting ATP synthase activity, rotational mechanism|GO:0015077,monovalent inorganic…	hsa00190,Oxidative phosphorylation|hsa04714,Thermogenesis|hsa01100,Metabolic pathways|hsa05016,Huntington disease|hsa05010,Alzheimer disease|hsa05012,Parkinson disease
Q15121	2.83825	1.505	Q15121	PEA15	GO:2001234,negative regulation of apoptotic signaling pathway|GO:2001235,positive regulation of apoptotic signaling pathway|GO:2001236,regulation of extrinsic apoptotic signaling pathway|GO:2001237,negative regulation of extrinsic apoptotic signaling pathway|GO:2001233,regulation of apoptotic signaling pathway|GO:0051049,regulation of transport|GO:0048585,negative regulation of response to stimul…	GO:0005856,cytoskeleton|GO:0043234,protein complex|GO:0015630,microtubule cytoskeleton|GO:0043228,non-membrane-bounded organelle|GO:0043232,intracellular non-membrane-bounded organelle|GO:0044464,cell part|GO:0005737,cytoplasm|GO:0005623,cell|GO:0043226,organelle|GO:0044446,intracellular organelle part|GO:0043229,intracellular organelle|GO:0044430,cytoskeletal part|GO:0044424,intracellular part|G…	GO:0005488,binding|GO:0005515,protein binding
O15347	2.81669	1.494	O15347	HMGB3	GO:0080090,regulation of primary metabolic process|GO:0019222,regulation of metabolic process|GO:1901362,organic cyclic compound biosynthetic process|GO:0071840,cellular component organization or biogenesis|GO:0048869,cellular developmental process|GO:0048513,animal organ development|GO:0048519,negative regulation of biological process|GO:0032392,DNA geometric change|GO:0060255,regulation of macr…	GO:0043231,intracellular membrane-bounded organelle|GO:0043232,intracellular non-membrane-bounded organelle|GO:0043227,membrane-bounded organelle|GO:0005634,nucleus|GO:0044464,cell part|GO:0005623,cell|GO:0005622,intracellular|GO:0043229,intracellular organelle|GO:0043228,non-membrane-bounded organelle|GO:0044424,intracellular part|GO:0005694,chromosome|GO:0043226,organelle|GO:0005737,cytoplasm|G…	GO:0000400,four-way junction DNA binding|GO:0005515,protein binding|GO:0097159,organic cyclic compound binding|GO:0044822,poly(A) RNA binding|GO:0000217,DNA secondary structure binding|GO:0043566,structure-specific DNA binding|GO:0044877,macromolecular complex binding|GO:0003723,RNA binding|GO:0003676,nucleic acid binding|GO:0003677,DNA binding|GO:0008301,DNA binding, bending|GO:0003690,double-st…
P53985	2.81474	1.493	P53985	SLC16A1	GO:0090087,regulation of peptide transport|GO:0015728,mevalonate transport|GO:0008104,protein localization|GO:0007599,hemostasis|GO:0051046,regulation of secretion|GO:0051049,regulation of transport|GO:0007596,blood coagulation|GO:0007610,behavior|GO:0006820,anion transport|GO:0044281,small molecule metabolic process|GO:0071840,cellular component organization or biogenesis|GO:0044710,single-organ…	GO:0043229,intracellular organelle|GO:0043228,non-membrane-bounded organelle|GO:0005815,microtubule organizing center|GO:0031226,intrinsic component of plasma membrane|GO:0043226,organelle|GO:0031224,intrinsic component of membrane|GO:0005856,cytoskeleton|GO:0031982,vesicle|GO:0005813,centrosome|GO:0016021,integral component of membrane|GO:0016020,membrane|GO:0044444,cytoplasmic part|GO:0005739,m…	GO:0005342,organic acid transmembrane transporter activity|GO:0008028,monocarboxylic acid transmembrane transporter activity|GO:0005488,binding|GO:0015129,lactate transmembrane transporter activity|GO:0008509,anion transmembrane transporter activity|GO:1901618,organic hydroxy compound transmembrane transporter activity|GO:0042802,identical protein binding|GO:0042803,protein homodimerization activ…
Q15029	2.79529	1.483	Q15029	EFTUD2	GO:0090304,nucleic acid metabolic process|GO:0034641,cellular nitrogen compound metabolic process|GO:0006807,nitrogen compound metabolic process|GO:0044237,cellular metabolic process|GO:1901360,organic cyclic compound metabolic process|GO:0006139,nucleobase-containing compound metabolic process|GO:0044260,cellular macromolecule metabolic process|GO:0071704,organic substance metabolic process|GO:0…	GO:0031974,membrane-enclosed lumen|GO:0043229,intracellular organelle|GO:0043227,membrane-bounded organelle|GO:0043226,organelle|GO:0016607,nuclear speck|GO:0016604,nuclear body|GO:0031981,nuclear lumen|GO:0005634,nucleus|GO:0016020,membrane|GO:0030529,intracellular ribonucleoprotein complex|GO:0005654,nucleoplasm|GO:0044451,nucleoplasm part|GO:0005737,cytoplasm|GO:0071013,catalytic step 2 splice…	GO:0035639,purine ribonucleoside triphosphate binding|GO:0005488,binding|GO:0003676,nucleic acid binding|GO:0043167,ion binding|GO:1901363,heterocyclic compound binding|GO:0001883,purine nucleoside binding|GO:0001882,nucleoside binding|GO:0043168,anion binding|GO:0016462,pyrophosphatase activity|GO:0000166,nucleotide binding|GO:0032561,guanyl ribonucleotide binding|GO:1901265,nucleoside phosphate…	hsa03040,Spliceosome
Q9NX40	2.78949	1.48	Q9NX40	OCIAD1	GO:0032502,developmental process|GO:0048863,stem cell differentiation|GO:2000736,regulation of stem cell differentiation|GO:0050793,regulation of developmental process|GO:0048869,cellular developmental process|GO:0030154,cell differentiation|GO:0050794,regulation of cellular process|GO:0044767,single-organism developmental process|GO:0045595,regulation of cell differentiation|GO:0065007,biologica…	GO:0005737,cytoplasm|GO:0043231,intracellular membrane-bounded organelle|GO:0005768,endosome|GO:0016020,membrane|GO:0044464,cell part|GO:0044444,cytoplasmic part|GO:0005739,mitochondrion|GO:0005622,intracellular|GO:0005623,cell|GO:0043229,intracellular organelle|GO:0012505,endomembrane system|GO:0044424,intracellular part|GO:0043227,membrane-bounded organelle|GO:0043226,organelle|GO:0031410,cytop…	GO:0005488,binding|GO:0005515,protein binding
Q8TCJ2	2.78176	1.476	Q8TCJ2	STT3B	GO:0006950,response to stress|GO:0036503,ERAD pathway|GO:0044248,cellular catabolic process|GO:0044257,cellular protein catabolic process|GO:0034645,cellular macromolecule biosynthetic process|GO:1901576,organic substance biosynthetic process|GO:0043632,modification-dependent macromolecule catabolic process|GO:0009100,glycoprotein metabolic process|GO:0009101,glycoprotein biosynthetic process|GO:…	GO:0005783,endoplasmic reticulum|GO:0005789,endoplasmic reticulum membrane|GO:0042175,nuclear outer membrane-endoplasmic reticulum membrane network|GO:0043229,intracellular organelle|GO:0043227,membrane-bounded organelle|GO:0043226,organelle|GO:0031224,intrinsic component of membrane|GO:0005737,cytoplasm|GO:0031090,organelle membrane|GO:0016021,integral component of membrane|GO:0016020,membrane|G…	GO:0003824,catalytic activity|GO:0016740,transferase activity|GO:0004576,oligosaccharyl transferase activity|GO:0016757,transferase activity, transferring glycosyl groups|GO:0016758,transferase activity, transferring hexosyl groups|GO:0004579,dolichyl-diphosphooligosaccharide-protein glycotransferase activity|GO:0043169,cation binding|GO:0046872,metal ion binding|GO:0043167,ion binding|GO:0005488…	hsa04141,Protein processing in endoplasmic reticulum|hsa00513,Various types of N-glycan biosynthesis|hsa00510,N-Glycan biosynthesis|hsa01100,Metabolic pathways
P21796	2.76255	1.466	P21796	VDAC1	GO:0019222,regulation of metabolic process|GO:0051049,regulation of transport|GO:0007612,learning|GO:0007610,behavior|GO:0007611,learning or memory|GO:0006820,anion transport|GO:0034765,regulation of ion transmembrane transport|GO:0034762,regulation of transmembrane transport|GO:0044712,single-organism catabolic process|GO:0044710,single-organism metabolic process|GO:0048869,cellular developmenta…	GO:0098796,membrane protein complex|GO:0044421,extracellular region part|GO:0044464,cell part|GO:0031974,membrane-enclosed lumen|GO:0031975,envelope|GO:0043229,intracellular organelle|GO:0043228,non-membrane-bounded organelle|GO:0042645,mitochondrial nucleoid|GO:0043227,membrane-bounded organelle|GO:0043226,organelle|GO:0031224,intrinsic component of membrane|GO:0005737,cytoplasm|GO:0046930,pore …	GO:0019899,enzyme binding|GO:0044877,macromolecular complex binding|GO:0005488,binding|GO:0022838,substrate-specific channel activity|GO:0008509,anion transmembrane transporter activity|GO:0022829,wide pore channel activity|GO:0032403,protein complex binding|GO:0022803,passive transmembrane transporter activity|GO:0005253,anion channel activity|GO:0005215,transporter activity|GO:0005216,ion chann…	hsa04022,cGMP-PKG signaling pathway|hsa04979,Cholesterol metabolism|hsa04020,Calcium signaling pathway|hsa04621,NOD-like receptor signaling pathway|hsa04218,Cellular senescence|hsa05012,Parkinson disease|hsa05164,Influenza A|hsa05016,Huntington disease|hsa05166,Human T-cell leukemia virus 1 infection|hsa04217,Necroptosis
Q07666	2.76063	1.465	Q07666	KHDRBS1	GO:0051169,nuclear transport|GO:0051168,nuclear export|GO:0032388,positive regulation of intracellular transport|GO:0080090,regulation of primary metabolic process|GO:0019222,regulation of metabolic process|GO:0000086,G2/M transition of mitotic cell cycle|GO:0051049,regulation of transport|GO:0032386,regulation of intracellular transport|GO:0048584,positive regulation of response to stimulus|GO:0…	GO:0031974,membrane-enclosed lumen|GO:0043229,intracellular organelle|GO:0071944,cell periphery|GO:0043227,membrane-bounded organelle|GO:0043226,organelle|GO:0005737,cytoplasm|GO:0098797,plasma membrane protein complex|GO:0031981,nuclear lumen|GO:0070013,intracellular organelle lumen|GO:0005634,nucleus|GO:0016020,membrane|GO:0005654,nucleoplasm|GO:0044459,plasma membrane part|GO:0005886,plasma me…	GO:0008143,poly(A) binding|GO:0017124,SH3 domain binding|GO:0044877,macromolecular complex binding|GO:0005488,binding|GO:0003676,nucleic acid binding|GO:0003677,DNA binding|GO:0008187,poly-pyrimidine tract binding|GO:1901363,heterocyclic compound binding|GO:0005070,SH3/SH2 adaptor activity|GO:0003727,single-stranded RNA binding|GO:0032403,protein complex binding|GO:0042802,identical protein bindi…
P07954	2.74727	1.458	P07954	FH	GO:0060249,anatomical structure homeostasis|GO:0019752,carboxylic acid metabolic process|GO:0042592,homeostatic process|GO:0006099,tricarboxylic acid cycle|GO:0009060,aerobic respiration|GO:0044281,small molecule metabolic process|GO:0006091,generation of precursor metabolites and energy|GO:0072350,tricarboxylic acid metabolic process|GO:0044699,single-organism process|GO:0044710,single-organism …	GO:0031974,membrane-enclosed lumen|GO:0043229,intracellular organelle|GO:0043227,membrane-bounded organelle|GO:0043226,organelle|GO:0005737,cytoplasm|GO:0070062,extracellular exosome|GO:0005739,mitochondrion|GO:0031988,membrane-bounded vesicle|GO:0005759,mitochondrial matrix|GO:0045239,tricarboxylic acid cycle enzyme complex|GO:0032991,macromolecular complex|GO:1903561,extracellular vesicle|GO:00…	GO:0016835,carbon-oxygen lyase activity|GO:0016836,hydro-lyase activity|GO:0003824,catalytic activity|GO:0005488,binding|GO:0005515,protein binding|GO:0004333,fumarate hydratase activity|GO:0016829,lyase activity	hsa00620,Pyruvate metabolism|hsa01100,Metabolic pathways|hsa05211,Renal cell carcinoma|hsa05200,Pathways in cancer|hsa01200,Carbon metabolism|hsa04934,Cushing syndrome|hsa00020,Citrate cycle (TCA cycle)
P28072	2.73967	1.454	P28072	PSMB6	GO:0080090,regulation of primary metabolic process|GO:0019222,regulation of metabolic process|GO:0048585,negative regulation of response to stimulus|GO:0048584,positive regulation of response to stimulus|GO:0048583,regulation of response to stimulus|GO:0031349,positive regulation of defense response|GO:0030111,regulation of Wnt signaling pathway|GO:0007165,signal transduction|GO:0007166,cell surf…	GO:0031974,membrane-enclosed lumen|GO:0043229,intracellular organelle|GO:0043227,membrane-bounded organelle|GO:0043226,organelle|GO:0005737,cytoplasm|GO:0005839,proteasome core complex|GO:0031981,nuclear lumen|GO:0005634,nucleus|GO:0031988,membrane-bounded vesicle|GO:0005654,nucleoplasm|GO:0032991,macromolecular complex|GO:0005794,Golgi apparatus|GO:0031982,vesicle|GO:0012505,endomembrane system|…	GO:0016787,hydrolase activity|GO:0004175,endopeptidase activity|GO:0004298,threonine-type endopeptidase activity|GO:0003824,catalytic activity|GO:0070003,threonine-type peptidase activity|GO:0070011,peptidase activity, acting on L-amino acid peptides|GO:0008233,peptidase activity|GO:0045296,cadherin binding|GO:0005488,binding|GO:0005515,protein binding|GO:0050839,cell adhesion molecule binding|GO…	hsa03050,Proteasome
A0A0A0MSM0	2.72641	1.447	A0A0A0MSM0	HSPH1		GO:0005737,cytoplasm|GO:0044446,intracellular organelle part|GO:0005829,cytosol|GO:0043231,intracellular membrane-bounded organelle|GO:0031981,nuclear lumen|GO:0043233,organelle lumen|GO:0005634,nucleus|GO:0044464,cell part|GO:0044444,cytoplasmic part|GO:0031974,membrane-enclosed lumen|GO:0005622,intracellular|GO:0005654,nucleoplasm|GO:0070013,intracellular organelle lumen|GO:0043229,intracellula…		hsa04141,Protein processing in endoplasmic reticulum
Q96CS3	2.70382	1.435	Q96CS3	FAF2	GO:0010033,response to organic substance|GO:0008104,protein localization|GO:0009892,negative regulation of metabolic process|GO:0019222,regulation of metabolic process|GO:0051649,establishment of localization in cell|GO:1903513,endoplasmic reticulum to cytosol transport|GO:0036503,ERAD pathway|GO:0044248,cellular catabolic process|GO:0051641,cellular localization|GO:0043632,modification-dependent…	GO:0005811,lipid particle|GO:0005783,endoplasmic reticulum|GO:0005789,endoplasmic reticulum membrane|GO:0042175,nuclear outer membrane-endoplasmic reticulum membrane network|GO:0043229,intracellular organelle|GO:0043228,non-membrane-bounded organelle|GO:0043227,membrane-bounded organelle|GO:0043226,organelle|GO:0005737,cytoplasm|GO:0031090,organelle membrane|GO:0016020,membrane|GO:0044432,endopla…	GO:0035473,lipase binding|GO:0055102,lipase inhibitor activity|GO:0044389,ubiquitin-like protein ligase binding|GO:0030234,enzyme regulator activity|GO:0032182,ubiquitin-like protein binding|GO:0019899,enzyme binding|GO:0031625,ubiquitin protein ligase binding|GO:0043130,ubiquitin binding|GO:0005488,binding|GO:0005515,protein binding|GO:0004857,enzyme inhibitor activity|GO:0098772,molecular funct…
V9HW80	2.69821	1.432	V9HW80	HEL-S-70	GO:0008104,protein localization|GO:0032436,positive regulation of proteasomal ubiquitin-dependent protein catabolic process|GO:0080090,regulation of primary metabolic process|GO:0032434,regulation of proteasomal ubiquitin-dependent protein catabolic process|GO:0034214,protein hexamerization|GO:0009167,purine ribonucleoside monophosphate metabolic process|GO:0044281,small molecule metabolic proces…	GO:0005783,endoplasmic reticulum|GO:0031974,membrane-enclosed lumen|GO:0005789,endoplasmic reticulum membrane|GO:0042175,nuclear outer membrane-endoplasmic reticulum membrane network|GO:0043229,intracellular organelle|GO:0043227,membrane-bounded organelle|GO:0043226,organelle|GO:0005737,cytoplasm|GO:0031984,organelle subcompartment|GO:0031981,nuclear lumen|GO:0098796,membrane protein complex|GO:0…	GO:0035639,purine ribonucleoside triphosphate binding|GO:0019899,enzyme binding|GO:0044877,macromolecular complex binding|GO:0005488,binding|GO:0016887,ATPase activity|GO:0031593,polyubiquitin binding|GO:0000166,nucleotide binding|GO:1901363,heterocyclic compound binding|GO:1901265,nucleoside phosphate binding|GO:0043168,anion binding|GO:1990381,ubiquitin-specific protease binding|GO:0043167,ion …
P52597	2.62806	1.394	P52597	HNRNPF	GO:0080090,regulation of primary metabolic process|GO:0019222,regulation of metabolic process|GO:0031323,regulation of cellular metabolic process|GO:0090304,nucleic acid metabolic process|GO:0034641,cellular nitrogen compound metabolic process|GO:0006807,nitrogen compound metabolic process|GO:0044237,cellular metabolic process|GO:0043170,macromolecule metabolic process|GO:0050789,regulation of bi…	GO:0031974,membrane-enclosed lumen|GO:0043229,intracellular organelle|GO:0043227,membrane-bounded organelle|GO:0043226,organelle|GO:0031981,nuclear lumen|GO:0005634,nucleus|GO:0016020,membrane|GO:0030529,intracellular ribonucleoprotein complex|GO:0005654,nucleoplasm|GO:0071013,catalytic step 2 spliceosome|GO:0032991,macromolecular complex|GO:0043231,intracellular membrane-bounded organelle|GO:004…	GO:0005515,protein binding|GO:0097159,organic cyclic compound binding|GO:0044822,poly(A) RNA binding|GO:0000166,nucleotide binding|GO:0036094,small molecule binding|GO:0003727,single-stranded RNA binding|GO:0003723,RNA binding|GO:0003676,nucleic acid binding|GO:1901363,heterocyclic compound binding|GO:1901265,nucleoside phosphate binding|GO:0005488,binding|GO:0008134,transcription factor binding|…
P11021	2.62624	1.393	P11021	HSPA5	GO:0006887,exocytosis|GO:0019220,regulation of phosphate metabolic process|GO:0080090,regulation of primary metabolic process|GO:0019222,regulation of metabolic process|GO:0051049,regulation of transport|GO:0048585,negative regulation of response to stimulus|GO:0007596,blood coagulation|GO:0048583,regulation of response to stimulus|GO:0006468,protein phosphorylation|GO:0060322,head development|GO…	GO:0005783,endoplasmic reticulum|GO:0044421,extracellular region part|GO:0044464,cell part|GO:0048770,pigment granule|GO:0031974,membrane-enclosed lumen|GO:0005789,endoplasmic reticulum membrane|GO:0043226,organelle|GO:0042175,nuclear outer membrane-endoplasmic reticulum membrane network|GO:0043229,intracellular organelle|GO:0030176,integral component of endoplasmic reticulum membrane|GO:0031301,…	GO:0044389,ubiquitin-like protein ligase binding|GO:0035639,purine ribonucleoside triphosphate binding|GO:0019899,enzyme binding|GO:0044877,macromolecular complex binding|GO:0005488,binding|GO:0016887,ATPase activity|GO:0043167,ion binding|GO:1901363,heterocyclic compound binding|GO:0001883,purine nucleoside binding|GO:0001882,nucleoside binding|GO:0043168,anion binding|GO:0043169,cation binding|…	hsa04141,Protein processing in endoplasmic reticulum|hsa04918,Thyroid hormone synthesis|hsa04612,Antigen processing and presentation|hsa05020,Prion diseases|hsa03060,Protein export
P62983	2.61534	1.387	P62983	P62983
Q16643	2.61172	1.385	Q16643	DBN1	GO:0032502,developmental process|GO:0044707,single-multicellular organism process|GO:0010975,regulation of neuron projection development|GO:0030030,cell projection organization|GO:0031175,neuron projection development|GO:0048468,cell development|GO:0016358,dendrite development|GO:0030036,actin cytoskeleton organization|GO:0050804,modulation of synaptic transmission|GO:0048167,regulation of synapt…	GO:0015629,actin cytoskeleton|GO:0030425,dendrite|GO:0043229,intracellular organelle|GO:0043228,non-membrane-bounded organelle|GO:0043226,organelle|GO:0030054,cell junction|GO:0005921,gap junction|GO:0005856,cytoskeleton|GO:0016020,membrane|GO:0097458,neuron part|GO:0044430,cytoskeletal part|GO:0043005,neuron projection|GO:0042641,actomyosin|GO:0005737,cytoplasm|GO:0005938,cell cortex|GO:0005911,…	GO:0008092,cytoskeletal protein binding|GO:0003779,actin binding|GO:0005488,binding|GO:0005515,protein binding|GO:0005522,profilin binding|GO:0045296,cadherin binding|GO:0050839,cell adhesion molecule binding|GO:0044877,macromolecular complex binding|GO:0051015,actin filament binding
P62258	2.60629	1.382	P62258	YWHAE	GO:2001235,positive regulation of apoptotic signaling pathway|GO:0008104,protein localization|GO:0019220,regulation of phosphate metabolic process|GO:0080090,regulation of primary metabolic process|GO:0019222,regulation of metabolic process|GO:2001233,regulation of apoptotic signaling pathway|GO:0000086,G2/M transition of mitotic cell cycle|GO:0051049,regulation of transport|GO:0032386,regulation…	GO:0048770,pigment granule|GO:0030424,axon|GO:0043226,organelle|GO:0043229,intracellular organelle|GO:0043228,non-membrane-bounded organelle|GO:0005871,kinesin complex|GO:0005924,cell-substrate adherens junction|GO:0005925,focal adhesion|GO:0043227,membrane-bounded organelle|GO:0005875,microtubule associated complex|GO:0030054,cell junction|GO:0030055,cell-substrate junction|GO:0005856,cytoskelet…	GO:0044389,ubiquitin-like protein ligase binding|GO:0031406,carboxylic acid binding|GO:0019899,enzyme binding|GO:0044877,macromolecular complex binding|GO:0005488,binding|GO:0003676,nucleic acid binding|GO:0045309,protein phosphorylated amino acid binding|GO:0044325,ion channel binding|GO:0098772,molecular function regulator|GO:0016597,amino acid binding|GO:1901363,heterocyclic compound binding|G…	hsa04110,Cell cycle|hsa04621,NOD-like receptor signaling pathway|hsa04114,Oocyte meiosis|hsa04722,Neurotrophin signaling pathway|hsa04390,Hippo signaling pathway|hsa05203,Viral carcinogenesis|hsa05160,Hepatitis C|hsa04151,PI3K-Akt signaling pathway
B7ZAR1	2.59908	1.378	B7ZAR1	CCT5	GO:0044267,cellular protein metabolic process|GO:0006457,protein folding|GO:0044260,cellular macromolecule metabolic process|GO:0044238,primary metabolic process|GO:0019538,protein metabolic process|GO:0009987,cellular process|GO:0044237,cellular metabolic process|GO:0043170,macromolecule metabolic process|GO:0071704,organic substance metabolic process|GO:0008152,metabolic process	GO:0005737,cytoplasm|GO:0043231,intracellular membrane-bounded organelle|GO:0031981,nuclear lumen|GO:0043233,organelle lumen|GO:0005634,nucleus|GO:0005730,nucleolus|GO:0044464,cell part|GO:0043232,intracellular non-membrane-bounded organelle|GO:0031974,membrane-enclosed lumen|GO:0005622,intracellular|GO:0044446,intracellular organelle part|GO:0070013,intracellular organelle lumen|GO:0043229,intra…	GO:0035639,purine ribonucleoside triphosphate binding|GO:0005488,binding|GO:0043167,ion binding|GO:1901363,heterocyclic compound binding|GO:1901265,nucleoside phosphate binding|GO:0001882,nucleoside binding|GO:0043168,anion binding|GO:0051082,unfolded protein binding|GO:0000166,nucleotide binding|GO:0001883,purine nucleoside binding|GO:0032549,ribonucleoside binding|GO:0017076,purine nucleotide b…
P27797	2.58829	1.372	P27797	CALR	GO:0051169,nuclear transport|GO:0051168,nuclear export|GO:0006909,phagocytosis|GO:0051049,regulation of transport|GO:0098771,inorganic ion homeostasis|GO:0051716,cellular response to stimulus|GO:0000003,reproduction|GO:0030595,leukocyte chemotaxis|GO:0048468,cell development|GO:0007283,spermatogenesis|GO:0046483,heterocycle metabolic process|GO:0009605,response to external stimulus|GO:0019538,pro…	GO:0009897,external side of plasma membrane|GO:0016021,integral component of membrane|GO:0005783,endoplasmic reticulum|GO:0044421,extracellular region part|GO:0098576,lumenal side of membrane|GO:0098552,side of membrane|GO:0005788,endoplasmic reticulum lumen|GO:0031012,extracellular matrix|GO:0030139,endocytic vesicle|GO:0042175,nuclear outer membrane-endoplasmic reticulum membrane network|GO:004…	GO:0005488,binding|GO:0044389,ubiquitin-like protein ligase binding|GO:0050681,androgen receptor binding|GO:0030246,carbohydrate binding|GO:0019899,enzyme binding|GO:0044877,macromolecular complex binding|GO:0008270,zinc ion binding|GO:0003676,nucleic acid binding|GO:0003677,DNA binding|GO:1901363,heterocyclic compound binding|GO:0001948,glycoprotein binding|GO:0043169,cation binding|GO:0042277,p…	hsa05142,Chagas disease|hsa04612,Antigen processing and presentation|hsa04141,Protein processing in endoplasmic reticulum|hsa04145,Phagosome|hsa05169,Epstein-Barr virus infection|hsa05168,Herpes simplex virus 1 infection|hsa05166,Human T-cell leukemia virus 1 infection|hsa05170,Human immunodeficiency virus 1 infection|hsa05163,Human cytomegalovirus infection
P05091	2.57934	1.367	P05091	ALDH2	GO:0042133,neurotransmitter metabolic process|GO:0070887,cellular response to chemical stimulus|GO:0042136,neurotransmitter biosynthetic process|GO:1901615,organic hydroxy compound metabolic process|GO:0034310,primary alcohol catabolic process|GO:0009410,response to xenobiotic stimulus|GO:0023052,signaling|GO:0001505,regulation of neurotransmitter levels|GO:0044282,small molecule catabolic proces…	GO:0031974,membrane-enclosed lumen|GO:0043229,intracellular organelle|GO:0043227,membrane-bounded organelle|GO:0043226,organelle|GO:0005737,cytoplasm|GO:0070062,extracellular exosome|GO:0005739,mitochondrion|GO:0031988,membrane-bounded vesicle|GO:0005759,mitochondrial matrix|GO:1903561,extracellular vesicle|GO:0031982,vesicle|GO:0043230,extracellular organelle|GO:0043231,intracellular membrane-bo…	GO:0004030,aldehyde dehydrogenase [NAD(P)+] activity|GO:0004029,aldehyde dehydrogenase (NAD) activity|GO:0016620,oxidoreductase activity, acting on the aldehyde or oxo group of donors, NAD or NADP as acceptor|GO:0003824,catalytic activity|GO:0016903,oxidoreductase activity, acting on the aldehyde or oxo group of donors|GO:0009055,electron carrier activity|GO:0016491,oxidoreductase activity|GO:005…	hsa00310,Lysine degradation|hsa00561,Glycerolipid metabolism|hsa00380,Tryptophan metabolism|hsa00330,Arginine and proline metabolism|hsa00620,Pyruvate metabolism|hsa00410,beta-Alanine metabolism|hsa00071,Fatty acid degradation|hsa00280,Valine, leucine and isoleucine degradation|hsa00053,Ascorbate and aldarate metabolism|hsa00010,Glycolysis / Gluconeogenesis|hsa01100,Metabolic pathways|hsa00340,Hi…		D00123,Cyanamide (JP16); Cyanamide (TN)|D00131,Disulfiram (JP16/USP/INN); Antabuse (TN)
Q9H6Z4	2.54912	1.35	Q9H6Z4	RANBP3	GO:0033036,macromolecule localization|GO:0008104,protein localization|GO:0071702,organic substance transport|GO:0046907,intracellular transport|GO:0006810,transport|GO:0045184,establishment of protein localization|GO:0051649,establishment of localization in cell|GO:0015031,protein transport|GO:0051234,establishment of localization|GO:0051179,localization|GO:0051641,cellular localization|GO:005116…	GO:0005737,cytoplasm|GO:0044446,intracellular organelle part|GO:0043231,intracellular membrane-bounded organelle|GO:0031981,nuclear lumen|GO:0043233,organelle lumen|GO:0005634,nucleus|GO:0044464,cell part|GO:0031974,membrane-enclosed lumen|GO:0005622,intracellular|GO:0005654,nucleoplasm|GO:0070013,intracellular organelle lumen|GO:0043229,intracellular organelle|GO:0044428,nuclear part|GO:0005623,…	GO:0008536,Ran GTPase binding|GO:0019899,enzyme binding|GO:0017016,Ras GTPase binding|GO:0046332,SMAD binding|GO:0031267,small GTPase binding|GO:0051020,GTPase binding|GO:0070412,R-SMAD binding|GO:0005488,binding|GO:0005515,protein binding|GO:0030234,enzyme regulator activity|GO:0005096,GTPase activator activity|GO:0030695,GTPase regulator activity|GO:0008047,enzyme activator activity|GO:0098772,…	hsa05166,Human T-cell leukemia virus 1 infection
P62151	2.47942	1.31		P62151
Q7L4K8	2.47942	1.31	Q7L4K8	IARS	GO:0044238,primary metabolic process|GO:0019752,carboxylic acid metabolic process|GO:0090304,nucleic acid metabolic process|GO:0044249,cellular biosynthetic process|GO:0034641,cellular nitrogen compound metabolic process|GO:0006807,nitrogen compound metabolic process|GO:0044281,small molecule metabolic process|GO:0034645,cellular macromolecule biosynthetic process|GO:0034660,ncRNA metabolic proce…		GO:0035639,purine ribonucleoside triphosphate binding|GO:0005488,binding|GO:0043167,ion binding|GO:1901363,heterocyclic compound binding|GO:1901265,nucleoside phosphate binding|GO:0043168,anion binding|GO:0004812,aminoacyl-tRNA ligase activity|GO:0000166,nucleotide binding|GO:0017076,purine nucleotide binding|GO:0005524,ATP binding|GO:0036094,small molecule binding|GO:0003824,catalytic activity|G…
P40227	2.42671	1.279	P40227	CCT6A	GO:0006457,protein folding|GO:0006458,'de novo' protein folding|GO:0019953,sexual reproduction|GO:1901998,toxin transport|GO:0044699,single-organism process|GO:0044267,cellular protein metabolic process|GO:0000003,reproduction|GO:0044260,cellular macromolecule metabolic process|GO:0051084,'de novo' posttranslational protein folding|GO:0071704,organic substance metabolic process|GO:0008037,cell re…	GO:0043229,intracellular organelle|GO:0043228,non-membrane-bounded organelle|GO:0001669,acrosomal vesicle|GO:0043227,membrane-bounded organelle|GO:0043226,organelle|GO:0005856,cytoskeleton|GO:0070062,extracellular exosome|GO:0044445,cytosolic part|GO:0016023,cytoplasmic, membrane-bounded vesicle|GO:0005874,microtubule|GO:0097223,sperm part|GO:0005832,chaperonin-containing T-complex|GO:0031988,mem…	GO:0035639,purine ribonucleoside triphosphate binding|GO:0005488,binding|GO:0003676,nucleic acid binding|GO:0000166,nucleotide binding|GO:1901363,heterocyclic compound binding|GO:1901265,nucleoside phosphate binding|GO:0001882,nucleoside binding|GO:0043168,anion binding|GO:0051082,unfolded protein binding|GO:0043167,ion binding|GO:0001883,purine nucleoside binding|GO:0032549,ribonucleoside bindin…
O43795	2.42335	1.277	O43795	MYO1B	GO:0022607,cellular component assembly|GO:0061572,actin filament bundle organization|GO:0043933,macromolecular complex subunit organization|GO:0030036,actin cytoskeleton organization|GO:0006928,movement of cell or subcellular component|GO:0044699,single-organism process|GO:0071822,protein complex subunit organization|GO:0048193,Golgi vesicle transport|GO:0016043,cellular component organization|GO…	GO:0016459,myosin complex|GO:0042995,cell projection|GO:0015629,actin cytoskeleton|GO:0044421,extracellular region part|GO:0030175,filopodium|GO:0043229,intracellular organelle|GO:0043228,non-membrane-bounded organelle|GO:0005622,intracellular|GO:0043227,membrane-bounded organelle|GO:0043226,organelle|GO:0010008,endosome membrane|GO:0005856,cytoskeleton|GO:0031984,organelle subcompartment|GO:0031…	GO:0035639,purine ribonucleoside triphosphate binding|GO:0044877,macromolecular complex binding|GO:0005488,binding|GO:0016887,ATPase activity|GO:0005547,phosphatidylinositol-3,4,5-trisphosphate binding|GO:1901363,heterocyclic compound binding|GO:0001883,purine nucleoside binding|GO:0001882,nucleoside binding|GO:0043168,anion binding|GO:0003779,actin binding|GO:0000146,microfilament motor activity…	hsa05130,Pathogenic Escherichia coli infection
P04075	2.40827	1.268	P04075	ALDOA	GO:0007599,hemostasis|GO:0060249,anatomical structure homeostasis|GO:0007596,blood coagulation|GO:0009167,purine ribonucleoside monophosphate metabolic process|GO:0061621,canonical glycolysis|GO:0061620,glycolytic process through glucose-6-phosphate|GO:0009163,nucleoside biosynthetic process|GO:0009161,ribonucleoside monophosphate metabolic process|GO:1901362,organic cyclic compound biosynthetic …	GO:0016020,membrane|GO:0015629,actin cytoskeleton|GO:0031974,membrane-enclosed lumen|GO:0030016,myofibril|GO:0030017,sarcomere|GO:0043229,intracellular organelle|GO:0043228,non-membrane-bounded organelle|GO:0060205,cytoplasmic membrane-bounded vesicle lumen|GO:0043227,membrane-bounded organelle|GO:0043226,organelle|GO:0005856,cytoskeleton|GO:0031430,M band|GO:0031983,vesicle lumen|GO:0070062,extr…	GO:0005488,binding|GO:0015631,tubulin binding|GO:0003676,nucleic acid binding|GO:0070061,fructose binding|GO:0008092,cytoskeletal protein binding|GO:0005515,protein binding|GO:0097159,organic cyclic compound binding|GO:0016829,lyase activity|GO:0016830,carbon-carbon lyase activity|GO:0030246,carbohydrate binding|GO:0016832,aldehyde-lyase activity|GO:1901363,heterocyclic compound binding|GO:000377…	hsa01200,Carbon metabolism|hsa01100,Metabolic pathways|hsa00030,Pentose phosphate pathway|hsa04066,HIF-1 signaling pathway|hsa00051,Fructose and mannose metabolism|hsa01230,Biosynthesis of amino acids|hsa00010,Glycolysis / Gluconeogenesis
P55884	2.38833	1.256	P55884	EIF3B	GO:0022607,cellular component assembly|GO:0080090,regulation of primary metabolic process|GO:0019222,regulation of metabolic process|GO:0043933,macromolecular complex subunit organization|GO:2000112,regulation of cellular macromolecule biosynthetic process|GO:0031323,regulation of cellular metabolic process|GO:0044249,cellular biosynthetic process|GO:0034641,cellular nitrogen compound metabolic p…	GO:0044421,extracellular region part|GO:0031974,membrane-enclosed lumen|GO:0043229,intracellular organelle|GO:0030529,intracellular ribonucleoprotein complex|GO:0043227,membrane-bounded organelle|GO:0043226,organelle|GO:0005737,cytoplasm|GO:0005852,eukaryotic translation initiation factor 3 complex|GO:0070062,extracellular exosome|GO:0031981,nuclear lumen|GO:0016282,eukaryotic 43S preinitiation c…	GO:0005488,binding|GO:0036094,small molecule binding|GO:0005515,protein binding|GO:0097159,organic cyclic compound binding|GO:0008135,translation factor activity, RNA binding|GO:0005198,structural molecule activity|GO:0032947,protein complex scaffold activity|GO:0003723,RNA binding|GO:0003676,nucleic acid binding|GO:0031369,translation initiation factor binding|GO:0000166,nucleotide binding|GO:19…	hsa03013,RNA transport
Q9UIJ7	2.35055	1.233	Q9UIJ7	AK3	GO:0007599,hemostasis|GO:0009218,pyrimidine ribonucleotide metabolic process|GO:0007596,blood coagulation|GO:0009167,purine ribonucleoside monophosphate metabolic process|GO:0009165,nucleotide biosynthetic process|GO:0009163,nucleoside biosynthetic process|GO:0009161,ribonucleoside monophosphate metabolic process|GO:1901362,organic cyclic compound biosynthetic process|GO:0046131,pyrimidine ribonu…	GO:0005737,cytoplasm|GO:0043231,intracellular membrane-bounded organelle|GO:0043233,organelle lumen|GO:0044464,cell part|GO:0044444,cytoplasmic part|GO:0031974,membrane-enclosed lumen|GO:0005622,intracellular|GO:0044446,intracellular organelle part|GO:0070013,intracellular organelle lumen|GO:0043229,intracellular organelle|GO:0005739,mitochondrion|GO:0044429,mitochondrial part|GO:0005759,mitochon…	GO:0019201,nucleotide kinase activity|GO:0019205,nucleobase-containing compound kinase activity|GO:0035639,purine ribonucleoside triphosphate binding|GO:0004017,adenylate kinase activity|GO:0005488,binding|GO:0043167,ion binding|GO:1901363,heterocyclic compound binding|GO:0001883,purine nucleoside binding|GO:0001882,nucleoside binding|GO:0043168,anion binding|GO:0000166,nucleotide binding|GO:0032…	hsa00230,Purine metabolism
Q13308	2.34567	1.23	Q13308	PTK7	GO:0010975,regulation of neuron projection development|GO:0048589,developmental growth|GO:0048468,cell development|GO:0007163,establishment or maintenance of cell polarity|GO:0007164,establishment of tissue polarity|GO:0007165,signal transduction|GO:0007166,cell surface receptor signaling pathway|GO:0031344,regulation of cell projection organization|GO:0071840,cellular component organization or b…	GO:0016020,membrane|GO:0005887,integral component of plasma membrane|GO:0044459,plasma membrane part|GO:0016021,integral component of membrane|GO:0070161,anchoring junction|GO:0044464,cell part|GO:0005623,cell|GO:0031224,intrinsic component of membrane|GO:0071944,cell periphery|GO:0005912,adherens junction|GO:0005911,cell-cell junction|GO:0005886,plasma membrane|GO:0044425,membrane part|GO:000592…	GO:0035639,purine ribonucleoside triphosphate binding|GO:0004672,protein kinase activity|GO:0043167,ion binding|GO:1901363,heterocyclic compound binding|GO:0001883,purine nucleoside binding|GO:0001882,nucleoside binding|GO:0043168,anion binding|GO:0000166,nucleotide binding|GO:0016740,transferase activity|GO:0004713,protein tyrosine kinase activity|GO:0032549,ribonucleoside binding|GO:0017076,pur…
Q16698	2.33593	1.224	Q16698	DECR1	GO:0034440,lipid oxidation|GO:0006631,fatty acid metabolic process|GO:0022607,cellular component assembly|GO:0006635,fatty acid beta-oxidation|GO:0051289,protein homotetramerization|GO:0043933,macromolecular complex subunit organization|GO:0019752,carboxylic acid metabolic process|GO:0044248,cellular catabolic process|GO:0009062,fatty acid catabolic process|GO:0044281,small molecule metabolic pro…	GO:0031974,membrane-enclosed lumen|GO:0043229,intracellular organelle|GO:0043227,membrane-bounded organelle|GO:0043226,organelle|GO:0005737,cytoplasm|GO:0070062,extracellular exosome|GO:0031981,nuclear lumen|GO:0005634,nucleus|GO:0005739,mitochondrion|GO:0031988,membrane-bounded vesicle|GO:0005654,nucleoplasm|GO:0005759,mitochondrial matrix|GO:1903561,extracellular vesicle|GO:0031982,vesicle|GO:0…	GO:0043168,anion binding|GO:0050662,coenzyme binding|GO:0050661,NADP binding|GO:0016628,oxidoreductase activity, acting on the CH-CH group of donors, NAD or NADP as acceptor|GO:0008670,2,4-dienoyl-CoA reductase (NADPH) activity|GO:0016627,oxidoreductase activity, acting on the CH-CH group of donors|GO:0097159,organic cyclic compound binding|GO:0000166,nucleotide binding|GO:0036094,small molecule …
Q13283	2.31017	1.208	Q13283	G3BP1	GO:0071103,DNA conformation change|GO:0048585,negative regulation of response to stimulus|GO:0048583,regulation of response to stimulus|GO:0090304,nucleic acid metabolic process|GO:0023057,negative regulation of signaling|GO:0030111,regulation of Wnt signaling pathway|GO:0006807,nitrogen compound metabolic process|GO:0023052,signaling|GO:0007165,signal transduction|GO:0007166,cell surface recepto…	GO:0035770,ribonucleoprotein granule|GO:0043229,intracellular organelle|GO:0043228,non-membrane-bounded organelle|GO:0036464,cytoplasmic ribonucleoprotein granule|GO:0005924,cell-substrate adherens junction|GO:0005925,focal adhesion|GO:0043227,membrane-bounded organelle|GO:0043226,organelle|GO:0030054,cell junction|GO:0030055,cell-substrate junction|GO:0005737,cytoplasm|GO:0005634,nucleus|GO:0016…	GO:0003676,nucleic acid binding|GO:0008026,ATP-dependent helicase activity|GO:0035639,purine ribonucleoside triphosphate binding|GO:0005488,binding|GO:0016887,ATPase activity|GO:0003677,DNA binding|GO:0003678,DNA helicase activity|GO:0008186,RNA-dependent ATPase activity|GO:0043167,ion binding|GO:1901363,heterocyclic compound binding|GO:0001883,purine nucleoside binding|GO:0001882,nucleoside bind…
P29373	2.30857	1.207	P29373	CRABP2	GO:0035108,limb morphogenesis|GO:0080090,regulation of primary metabolic process|GO:0019222,regulation of metabolic process|GO:0048672,positive regulation of collateral sprouting|GO:0035107,appendage morphogenesis|GO:0007165,signal transduction|GO:0061387,regulation of extent of cell growth|GO:1901362,organic cyclic compound biosynthetic process|GO:0031344,regulation of cell projection organizati…	GO:0005783,endoplasmic reticulum|GO:0031974,membrane-enclosed lumen|GO:0043229,intracellular organelle|GO:0043227,membrane-bounded organelle|GO:0043226,organelle|GO:0005737,cytoplasm|GO:0070062,extracellular exosome|GO:0031981,nuclear lumen|GO:0005634,nucleus|GO:0031988,membrane-bounded vesicle|GO:0005654,nucleoplasm|GO:0012505,endomembrane system|GO:1903561,extracellular vesicle|GO:0031982,vesic…	GO:0043168,anion binding|GO:0005515,protein binding|GO:0043178,alcohol binding|GO:0043177,organic acid binding|GO:0005215,transporter activity|GO:0031406,carboxylic acid binding|GO:0019841,retinol binding|GO:0019842,vitamin binding|GO:0043167,ion binding|GO:0036094,small molecule binding|GO:0019840,isoprenoid binding|GO:0005488,binding|GO:0008289,lipid binding|GO:0001972,retinoic acid binding|GO:…
P07858	2.2958	1.199	P07858	CTSB	GO:0019222,regulation of metabolic process|GO:0048584,positive regulation of response to stimulus|GO:0048583,regulation of response to stimulus|GO:0031349,positive regulation of defense response|GO:0007165,signal transduction|GO:0031347,regulation of defense response|GO:0044712,single-organism catabolic process|GO:0044710,single-organism metabolic process|GO:0000003,reproduction|GO:0097066,respon…	GO:0098590,plasma membrane region|GO:0000323,lytic vacuole|GO:0009897,external side of plasma membrane|GO:0044421,extracellular region part|GO:0098552,side of membrane|GO:0048770,pigment granule|GO:0031974,membrane-enclosed lumen|GO:0005901,caveola|GO:0043229,intracellular organelle|GO:0043228,non-membrane-bounded organelle|GO:0005739,mitochondrion|GO:0005773,vacuole|GO:0044853,plasma membrane ra…	GO:0001948,glycoprotein binding|GO:0016787,hydrolase activity|GO:0004175,endopeptidase activity|GO:0042277,peptide binding|GO:0005515,protein binding|GO:0097367,carbohydrate derivative binding|GO:0033218,amide binding|GO:0070011,peptidase activity, acting on L-amino acid peptides|GO:0003824,catalytic activity|GO:0030984,kininogen binding|GO:0004197,cysteine-type endopeptidase activity|GO:0044877,…	hsa04612,Antigen processing and presentation|hsa04621,NOD-like receptor signaling pathway|hsa04140,Autophagy - animal|hsa04142,Lysosome|hsa04210,Apoptosis|hsa04924,Renin secretion
Q6P2Q9	2.29421	1.198	Q6P2Q9	PRPF8	GO:0022607,cellular component assembly|GO:0000244,spliceosomal tri-snRNP complex assembly|GO:0043933,macromolecular complex subunit organization|GO:0090304,nucleic acid metabolic process|GO:0034641,cellular nitrogen compound metabolic process|GO:0006807,nitrogen compound metabolic process|GO:0044237,cellular metabolic process|GO:0034622,cellular macromolecular complex assembly|GO:0071840,cellular…	GO:0031974,membrane-enclosed lumen|GO:0043229,intracellular organelle|GO:0043227,membrane-bounded organelle|GO:0043226,organelle|GO:0016607,nuclear speck|GO:0044446,intracellular organelle part|GO:0016604,nuclear body|GO:0031981,nuclear lumen|GO:0005634,nucleus|GO:0016020,membrane|GO:0030529,intracellular ribonucleoprotein complex|GO:0005654,nucleoplasm|GO:0044451,nucleoplasm part|GO:0071013,cata…	GO:0005488,binding|GO:0036002,pre-mRNA binding|GO:0000386,second spliceosomal transesterification activity|GO:0030619,U1 snRNA binding|GO:0005515,protein binding|GO:0097157,pre-mRNA intronic binding|GO:0030620,U2 snRNA binding|GO:0030623,U5 snRNA binding|GO:0031593,polyubiquitin binding|GO:0032182,ubiquitin-like protein binding|GO:1901363,heterocyclic compound binding|GO:0003824,catalytic activit…	hsa03040,Spliceosome
Q96N66	2.25168	1.171	Q96N66	MBOAT7	GO:0021537,telencephalon development|GO:0044707,single-multicellular organism process|GO:0006650,glycerophospholipid metabolic process|GO:0048856,anatomical structure development|GO:0022030,telencephalon glial cell migration|GO:0006928,movement of cell or subcellular component|GO:0044249,cellular biosynthetic process|GO:0060322,head development|GO:0044281,small molecule metabolic process|GO:00218…	GO:0005783,endoplasmic reticulum|GO:0005789,endoplasmic reticulum membrane|GO:0042175,nuclear outer membrane-endoplasmic reticulum membrane network|GO:0043229,intracellular organelle|GO:0043227,membrane-bounded organelle|GO:0043226,organelle|GO:0031224,intrinsic component of membrane|GO:0005737,cytoplasm|GO:0031090,organelle membrane|GO:0016021,integral component of membrane|GO:0016020,membrane|G…	GO:0003824,catalytic activity|GO:0016740,transferase activity|GO:0016746,transferase activity, transferring acyl groups|GO:0016747,transferase activity, transferring acyl groups other than amino-acyl groups|GO:0005515,protein binding|GO:0071617,lysophospholipid acyltransferase activity|GO:0005488,binding|GO:0003841,1-acylglycerol-3-phosphate O-acyltransferase activity|GO:0042171,lysophosphatidic …	hsa00564,Glycerophospholipid metabolism
P13639	2.23612	1.161	P13639	EEF2	GO:0080090,regulation of primary metabolic process|GO:0019222,regulation of metabolic process|GO:0044710,single-organism metabolic process|GO:0044711,single-organism biosynthetic process|GO:0010604,positive regulation of macromolecule metabolic process|GO:0010608,posttranscriptional regulation of gene expression|GO:0043043,peptide biosynthetic process|GO:0002244,hematopoietic progenitor cell diff…	GO:0016234,inclusion body|GO:0016235,aggresome|GO:0043229,intracellular organelle|GO:0071944,cell periphery|GO:0030529,intracellular ribonucleoprotein complex|GO:0043227,membrane-bounded organelle|GO:0043226,organelle|GO:0005737,cytoplasm|GO:0031982,vesicle|GO:0005634,nucleus|GO:0016020,membrane|GO:0031988,membrane-bounded vesicle|GO:0005886,plasma membrane|GO:0032991,macromolecular complex|GO:19…	GO:0035639,purine ribonucleoside triphosphate binding|GO:0019899,enzyme binding|GO:0005488,binding|GO:0003676,nucleic acid binding|GO:0043167,ion binding|GO:1901363,heterocyclic compound binding|GO:0001883,purine nucleoside binding|GO:0001882,nucleoside binding|GO:0043168,anion binding|GO:0016462,pyrophosphatase activity|GO:0000166,nucleotide binding|GO:0032561,guanyl ribonucleotide binding|GO:19…	hsa04152,AMPK signaling pathway|hsa04921,Oxytocin signaling pathway
P23528	2.21914	1.15	P23528	CFL1	GO:0006909,phagocytosis|GO:0048584,positive regulation of response to stimulus|GO:0048583,regulation of response to stimulus|GO:0016358,dendrite development|GO:0008064,regulation of actin polymerization or depolymerization|GO:0007163,establishment or maintenance of cell polarity|GO:0007165,signal transduction|GO:0007166,cell surface receptor signaling pathway|GO:0007167,enzyme linked receptor pro…	GO:0098590,plasma membrane region|GO:0015629,actin cytoskeleton|GO:0044421,extracellular region part|GO:0031974,membrane-enclosed lumen|GO:0043229,intracellular organelle|GO:0043228,non-membrane-bounded organelle|GO:0005924,cell-substrate adherens junction|GO:0005925,focal adhesion|GO:0043227,membrane-bounded organelle|GO:0043226,organelle|GO:0030054,cell junction|GO:0030055,cell-substrate juncti…	GO:0003779,actin binding|GO:0005488,binding|GO:0005515,protein binding|GO:0008092,cytoskeletal protein binding|GO:0043168,anion binding|GO:0035091,phosphatidylinositol binding|GO:0005543,phospholipid binding|GO:0008289,lipid binding|GO:0051015,actin filament binding|GO:0043167,ion binding|GO:1902936,phosphatidylinositol bisphosphate binding|GO:0019903,protein phosphatase binding|GO:0019902,phosph…	hsa05133,Pertussis|hsa04360,Axon guidance|hsa05170,Human immunodeficiency virus 1 infection|hsa04666,Fc gamma R-mediated phagocytosis|hsa04810,Regulation of actin cytoskeleton
Q9P035	2.2176	1.149	Q9P035	HACD3	GO:0019220,regulation of phosphate metabolic process|GO:0080090,regulation of primary metabolic process|GO:0019222,regulation of metabolic process|GO:0048584,positive regulation of response to stimulus|GO:0048583,regulation of response to stimulus|GO:0032147,activation of protein kinase activity|GO:0007165,signal transduction|GO:0044283,small molecule biosynthetic process|GO:0042761,very long-cha…	GO:0005783,endoplasmic reticulum|GO:0005789,endoplasmic reticulum membrane|GO:0042175,nuclear outer membrane-endoplasmic reticulum membrane network|GO:0043229,intracellular organelle|GO:0005924,cell-substrate adherens junction|GO:0005925,focal adhesion|GO:0043227,membrane-bounded organelle|GO:0043226,organelle|GO:0031224,intrinsic component of membrane|GO:0030055,cell-substrate junction|GO:000573…	GO:0018812,3-hydroxyacyl-CoA dehydratase activity|GO:0003824,catalytic activity|GO:0016835,carbon-oxygen lyase activity|GO:0030234,enzyme regulator activity|GO:0016829,lyase activity|GO:0005096,GTPase activator activity|GO:0019899,enzyme binding|GO:0030695,GTPase regulator activity|GO:0008047,enzyme activator activity|GO:0005515,protein binding|GO:0098772,molecular function regulator|GO:0060589,n…	hsa00062,Fatty acid elongation|hsa01100,Metabolic pathways|hsa01212,Fatty acid metabolism|hsa01040,Biosynthesis of unsaturated fatty acids
P17174	2.19771	1.136	P17174	GOT1	GO:0044281,small molecule metabolic process|GO:0044282,small molecule catabolic process|GO:0044283,small molecule biosynthetic process|GO:0044712,single-organism catabolic process|GO:0044710,single-organism metabolic process|GO:0044711,single-organism biosynthetic process|GO:0019509,L-methionine salvage from methylthioadenosine|GO:0043650,dicarboxylic acid biosynthetic process|GO:0006071,glycerol…	GO:0000323,lytic vacuole|GO:0030424,axon|GO:0043229,intracellular organelle|GO:0005623,cell|GO:0043227,membrane-bounded organelle|GO:0043226,organelle|GO:0005737,cytoplasm|GO:0044306,neuron projection terminus|GO:0043679,axon terminus|GO:0005773,vacuole|GO:0005634,nucleus|GO:0031988,membrane-bounded vesicle|GO:0097458,neuron part|GO:0043005,neuron projection|GO:0042995,cell projection|GO:0031982,…	GO:0016830,carbon-carbon lyase activity|GO:0008483,transaminase activity|GO:0005488,binding|GO:0047801,L-cysteine:2-oxoglutarate aminotransferase activity|GO:1901363,heterocyclic compound binding|GO:0043168,anion binding|GO:0016829,lyase activity|GO:0043167,ion binding|GO:0004069,L-aspartate:2-oxoglutarate aminotransferase activity|GO:0016740,transferase activity|GO:0016769,transferase activity, …	hsa00330,Arginine and proline metabolism|hsa01200,Carbon metabolism|hsa00400,Phenylalanine, tyrosine and tryptophan biosynthesis|hsa01100,Metabolic pathways|hsa00250,Alanine, aspartate and glutamate metabolism|hsa00220,Arginine biosynthesis|hsa00360,Phenylalanine metabolism|hsa01230,Biosynthesis of amino acids|hsa00270,Cysteine and methionine metabolism|hsa00350,Tyrosine metabolism|hsa01210,2-Oxo…
P30101	2.19162	1.132	P30101	PDIA3	GO:2001235,positive regulation of apoptotic signaling pathway|GO:2001236,regulation of extrinsic apoptotic signaling pathway|GO:0008104,protein localization|GO:2001233,regulation of apoptotic signaling pathway|GO:0051049,regulation of transport|GO:0048584,positive regulation of response to stimulus|GO:2001238,positive regulation of extrinsic apoptotic signaling pathway|GO:0051169,nuclear transpor…	GO:0005783,endoplasmic reticulum|GO:0048770,pigment granule|GO:0031974,membrane-enclosed lumen|GO:0043229,intracellular organelle|GO:0005924,cell-substrate adherens junction|GO:0005925,focal adhesion|GO:0043227,membrane-bounded organelle|GO:0043226,organelle|GO:0030054,cell junction|GO:0030055,cell-substrate junction|GO:0005737,cytoplasm|GO:0012505,endomembrane system|GO:0070062,extracellular exo…	GO:0004175,endopeptidase activity|GO:0004197,cysteine-type endopeptidase activity|GO:0042578,phosphoric ester hydrolase activity|GO:0005488,binding|GO:0003676,nucleic acid binding|GO:0008233,peptidase activity|GO:0016864,intramolecular oxidoreductase activity, transposing S-S bonds|GO:0008234,cysteine-type peptidase activity|GO:0016860,intramolecular oxidoreductase activity|GO:0008081,phosphoric …	hsa04612,Antigen processing and presentation|hsa04141,Protein processing in endoplasmic reticulum|hsa05168,Herpes simplex virus 1 infection|hsa05169,Epstein-Barr virus infection|hsa05170,Human immunodeficiency virus 1 infection|hsa05163,Human cytomegalovirus infection
Q00059	2.19162	1.132	Q00059	TFAM	GO:0080090,regulation of primary metabolic process|GO:0019222,regulation of metabolic process|GO:1901362,organic cyclic compound biosynthetic process|GO:0071840,cellular component organization or biogenesis|GO:0044710,single-organism metabolic process|GO:0044711,single-organism biosynthetic process|GO:0010604,positive regulation of macromolecule metabolic process|GO:0006260,DNA replication|GO:000…	GO:0031974,membrane-enclosed lumen|GO:0043229,intracellular organelle|GO:0043228,non-membrane-bounded organelle|GO:0042645,mitochondrial nucleoid|GO:0043227,membrane-bounded organelle|GO:0009295,nucleoid|GO:0005737,cytoplasm|GO:0005634,nucleus|GO:0005739,mitochondrion|GO:0043226,organelle|GO:0005759,mitochondrial matrix|GO:0043231,intracellular membrane-bounded organelle|GO:0043232,intracellular …	GO:0031072,heat shock protein binding|GO:0001012,RNA polymerase II regulatory region DNA binding|GO:0001159,core promoter proximal region DNA binding|GO:0001077,transcriptional activator activity, RNA polymerase II core promoter proximal region sequence-specific binding|GO:0044877,macromolecular complex binding|GO:0005488,binding|GO:0003676,nucleic acid binding|GO:0003677,DNA binding|GO:1901363,h…	hsa05016,Huntington disease|hsa04371,Apelin signaling pathway
Q86VP6	2.12138	1.085	Q86VP6	CAND1	GO:0080090,regulation of primary metabolic process|GO:0019222,regulation of metabolic process|GO:1901362,organic cyclic compound biosynthetic process|GO:0071840,cellular component organization or biogenesis|GO:0010604,positive regulation of macromolecule metabolic process|GO:0048869,cellular developmental process|GO:0070647,protein modification by small protein conjugation or removal|GO:0032446,p…	GO:0031974,membrane-enclosed lumen|GO:0043229,intracellular organelle|GO:0043227,membrane-bounded organelle|GO:0043226,organelle|GO:0005737,cytoplasm|GO:0070062,extracellular exosome|GO:0031981,nuclear lumen|GO:0005634,nucleus|GO:0016020,membrane|GO:0031988,membrane-bounded vesicle|GO:0005654,nucleoplasm|GO:0032991,macromolecular complex|GO:1902494,catalytic complex|GO:1990234,transferase complex…	GO:0017025,TBP-class protein binding|GO:0008134,transcription factor binding|GO:0005488,binding|GO:0005515,protein binding
P36957	2.08782	1.062	P36957	DLST	GO:0006637,acyl-CoA metabolic process|GO:0019674,NAD metabolic process|GO:0006732,coenzyme metabolic process|GO:0006733,oxidoreduction coenzyme metabolic process|GO:0019752,carboxylic acid metabolic process|GO:0009063,cellular amino acid catabolic process|GO:0006099,tricarboxylic acid cycle|GO:0009060,aerobic respiration|GO:0009066,aspartate family amino acid metabolic process|GO:0044282,small mo…	GO:0045239,tricarboxylic acid cycle enzyme complex|GO:0031974,membrane-enclosed lumen|GO:1990204,oxidoreductase complex|GO:0043229,intracellular organelle|GO:0071944,cell periphery|GO:0045240,dihydrolipoyl dehydrogenase complex|GO:0043227,membrane-bounded organelle|GO:0043226,organelle|GO:0005737,cytoplasm|GO:0070062,extracellular exosome|GO:0043209,myelin sheath|GO:0005634,nucleus|GO:0016020,mem…	GO:0005515,protein binding|GO:0003824,catalytic activity|GO:0031072,heat shock protein binding|GO:0051087,chaperone binding|GO:0016751,S-succinyltransferase activity|GO:0016417,S-acyltransferase activity|GO:0016740,transferase activity|GO:0016746,transferase activity, transferring acyl groups|GO:0016747,transferase activity, transferring acyl groups other than amino-acyl groups|GO:0004149,dihydro…	hsa00310,Lysine degradation|hsa01200,Carbon metabolism|hsa01100,Metabolic pathways|hsa00380,Tryptophan metabolism|hsa00020,Citrate cycle (TCA cycle)
P04843	2.05908	1.042	P04843	RPN1	GO:0008104,protein localization|GO:0044237,cellular metabolic process|GO:0006613,cotranslational protein targeting to membrane|GO:0006612,protein targeting to membrane|GO:0006614,SRP-dependent cotranslational protein targeting to membrane|GO:1901564,organonitrogen compound metabolic process|GO:0061024,membrane organization|GO:0034641,cellular nitrogen compound metabolic process|GO:0006807,nitroge…	GO:0005783,endoplasmic reticulum|GO:0048770,pigment granule|GO:0005789,endoplasmic reticulum membrane|GO:0042175,nuclear outer membrane-endoplasmic reticulum membrane network|GO:0043229,intracellular organelle|GO:0043227,membrane-bounded organelle|GO:0043226,organelle|GO:0031224,intrinsic component of membrane|GO:0005737,cytoplasm|GO:0031982,vesicle|GO:0016023,cytoplasmic, membrane-bounded vesicl…	GO:0003676,nucleic acid binding|GO:0005515,protein binding|GO:0097159,organic cyclic compound binding|GO:0044822,poly(A) RNA binding|GO:0003824,catalytic activity|GO:0016740,transferase activity|GO:0004576,oligosaccharyl transferase activity|GO:0003723,RNA binding|GO:0016757,transferase activity, transferring glycosyl groups|GO:0016758,transferase activity, transferring hexosyl groups|GO:0004579,…	hsa04141,Protein processing in endoplasmic reticulum|hsa00513,Various types of N-glycan biosynthesis|hsa00510,N-Glycan biosynthesis|hsa01100,Metabolic pathways
P50991	2.05765	1.041	P50991	CCT4	GO:0006457,protein folding|GO:0006458,'de novo' protein folding|GO:0019953,sexual reproduction|GO:1901998,toxin transport|GO:0044699,single-organism process|GO:0044267,cellular protein metabolic process|GO:0000003,reproduction|GO:0044260,cellular macromolecule metabolic process|GO:0051084,'de novo' posttranslational protein folding|GO:0071704,organic substance metabolic process|GO:0008037,cell re…	GO:0048770,pigment granule|GO:0031974,membrane-enclosed lumen|GO:0043229,intracellular organelle|GO:0043228,non-membrane-bounded organelle|GO:0005815,microtubule organizing center|GO:0005874,microtubule|GO:0043226,organelle|GO:0005856,cytoskeleton|GO:0070062,extracellular exosome|GO:0031981,nuclear lumen|GO:0044445,cytosolic part|GO:0016023,cytoplasmic, membrane-bounded vesicle|GO:0031410,cytopla…	GO:0035639,purine ribonucleoside triphosphate binding|GO:0005488,binding|GO:0003676,nucleic acid binding|GO:0000166,nucleotide binding|GO:1901363,heterocyclic compound binding|GO:1901265,nucleoside phosphate binding|GO:0001882,nucleoside binding|GO:0043168,anion binding|GO:0051082,unfolded protein binding|GO:0043167,ion binding|GO:0001883,purine nucleoside binding|GO:0032549,ribonucleoside bindin…
A0A384N6C2	2.05338	1.038	P12268	IMPDH2	GO:0051289,protein homotetramerization|GO:0009167,purine ribonucleoside monophosphate metabolic process|GO:0009165,nucleotide biosynthetic process|GO:0009163,nucleoside biosynthetic process|GO:0009161,ribonucleoside monophosphate metabolic process|GO:1901362,organic cyclic compound biosynthetic process|GO:0042451,purine nucleoside biosynthetic process|GO:0071840,cellular component organization or…	GO:0044421,extracellular region part|GO:0042579,microbody|GO:0043229,intracellular organelle|GO:0043227,membrane-bounded organelle|GO:0043226,organelle|GO:0005737,cytoplasm|GO:0005778,peroxisomal membrane|GO:0031982,vesicle|GO:0005634,nucleus|GO:0016020,membrane|GO:0005777,peroxisome|GO:0031988,membrane-bounded vesicle|GO:0044439,peroxisomal part|GO:0044438,microbody part|GO:0031903,microbody mem…	GO:0005488,binding|GO:0043169,cation binding|GO:0016614,oxidoreductase activity, acting on CH-OH group of donors|GO:0005515,protein binding|GO:0016616,oxidoreductase activity, acting on the CH-OH group of donors, NAD or NADP as acceptor|GO:0003938,IMP dehydrogenase activity|GO:0097159,organic cyclic compound binding|GO:0043167,ion binding|GO:0000166,nucleotide binding|GO:0036094,small molecule bi…	hsa00983,Drug metabolism - other enzymes|hsa01100,Metabolic pathways|hsa00230,Purine metabolism		D00752,Mycophenolate mofetil (JAN/USAN); Cellcept (TN)|D01392,Mizoribine (JP16/INN); Bredinin (TN)|D04936,Merimepodib (USAN/INN)|D05094,Mycophenolate mofetil hydrochloride (USAN); Cellcept (TN)|D05095,Mycophenolate sodium (USAN)|D05096,Mycophenolic acid (USAN/INN); Myfortic (TN)
P28331	1.96292	0.973	P28331	NDUFS1	GO:0042391,regulation of membrane potential|GO:0009141,nucleoside triphosphate metabolic process|GO:0009144,purine nucleoside triphosphate metabolic process|GO:0009167,purine ribonucleoside monophosphate metabolic process|GO:0034641,cellular nitrogen compound metabolic process|GO:0006807,nitrogen compound metabolic process|GO:1901360,organic cyclic compound metabolic process|GO:0044281,small mole…	GO:0044464,cell part|GO:0031970,organelle envelope lumen|GO:0031974,membrane-enclosed lumen|GO:1990204,oxidoreductase complex|GO:0043229,intracellular organelle|GO:0043227,membrane-bounded organelle|GO:0043226,organelle|GO:0005737,cytoplasm|GO:0031090,organelle membrane|GO:0098796,membrane protein complex|GO:0043209,myelin sheath|GO:0016020,membrane|GO:0098803,respiratory chain complex|GO:0044444…	GO:0005488,binding|GO:0043169,cation binding|GO:0009055,electron carrier activity|GO:0051539,4 iron, 4 sulfur cluster binding|GO:0003824,catalytic activity|GO:0008137,NADH dehydrogenase (ubiquinone) activity|GO:0051536,iron-sulfur cluster binding|GO:0051537,2 iron, 2 sulfur cluster binding|GO:0043167,ion binding|GO:0016655,oxidoreductase activity, acting on NAD(P)H, quinone or similar compound as…	hsa00190,Oxidative phosphorylation|hsa04714,Thermogenesis|hsa01100,Metabolic pathways|hsa04723,Retrograde endocannabinoid signaling|hsa05012,Parkinson disease|hsa05016,Huntington disease|hsa05010,Alzheimer disease|hsa04932,Non-alcoholic fatty liver disease
P25788	1.95613	0.968	P25788	PSMA3	GO:0080090,regulation of primary metabolic process|GO:0019222,regulation of metabolic process|GO:0048585,negative regulation of response to stimulus|GO:0048584,positive regulation of response to stimulus|GO:0048583,regulation of response to stimulus|GO:0031349,positive regulation of defense response|GO:0030111,regulation of Wnt signaling pathway|GO:0007165,signal transduction|GO:0007166,cell surf…	GO:0019773,proteasome core complex, alpha-subunit complex|GO:0031974,membrane-enclosed lumen|GO:0043229,intracellular organelle|GO:0043227,membrane-bounded organelle|GO:0043226,organelle|GO:0005737,cytoplasm|GO:0005839,proteasome core complex|GO:0031981,nuclear lumen|GO:0005634,nucleus|GO:0031988,membrane-bounded vesicle|GO:0005654,nucleoplasm|GO:0032991,macromolecular complex|GO:0031982,vesicle|…	GO:0016787,hydrolase activity|GO:0004175,endopeptidase activity|GO:0004298,threonine-type endopeptidase activity|GO:0003824,catalytic activity|GO:0070003,threonine-type peptidase activity|GO:0070011,peptidase activity, acting on L-amino acid peptides|GO:0005488,binding|GO:0005515,protein binding|GO:0008233,peptidase activity|GO:0031625,ubiquitin protein ligase binding|GO:0044389,ubiquitin-like pr…	hsa03050,Proteasome
Q15019	1.87774	0.909	Q15019	SEPTIN2	GO:0008104,protein localization|GO:0019222,regulation of metabolic process|GO:0051049,regulation of transport|GO:0048468,cell development|GO:0006820,anion transport|GO:0007165,signal transduction|GO:0007166,cell surface receptor signaling pathway|GO:0071840,cellular component organization or biogenesis|GO:0051716,cellular response to stimulus|GO:0048869,cellular developmental process|GO:0051952,r…	GO:0098590,plasma membrane region|GO:0042995,cell projection|GO:0015629,actin cytoskeleton|GO:0060170,ciliary membrane|GO:0044464,cell part|GO:0000145,exocyst|GO:0031974,membrane-enclosed lumen|GO:0097610,cell surface furrow|GO:0043229,intracellular organelle|GO:0043228,non-membrane-bounded organelle|GO:0045202,synapse|GO:0005929,cilium|GO:0031513,nonmotile primary cilium|GO:0043227,membrane-boun…	GO:0035639,purine ribonucleoside triphosphate binding|GO:0032947,protein complex scaffold activity|GO:0043167,ion binding|GO:1901363,heterocyclic compound binding|GO:1901265,nucleoside phosphate binding|GO:0001882,nucleoside binding|GO:0043168,anion binding|GO:0098772,molecular function regulator|GO:0000166,nucleotide binding|GO:0032561,guanyl ribonucleotide binding|GO:0001883,purine nucleoside b…	hsa05100,Bacterial invasion of epithelial cells
U5Z487	1.86995	0.903	U5Z487	COX2	GO:0019220,regulation of phosphate metabolic process|GO:0080090,regulation of primary metabolic process|GO:0019222,regulation of metabolic process|GO:0007595,lactation|GO:1903578,regulation of ATP metabolic process|GO:0009165,nucleotide biosynthetic process|GO:0044281,small molecule metabolic process|GO:0009161,ribonucleoside monophosphate metabolic process|GO:1901362,organic cyclic compound bios…	GO:0044464,cell part|GO:0031975,envelope|GO:0043229,intracellular organelle|GO:0043227,membrane-bounded organelle|GO:0043226,organelle|GO:0031224,intrinsic component of membrane|GO:0005737,cytoplasm|GO:0031090,organelle membrane|GO:0016021,integral component of membrane|GO:0016020,membrane|GO:0044444,cytoplasmic part|GO:0005739,mitochondrion|GO:0031967,organelle envelope|GO:0031966,mitochondrial …	GO:0005488,binding|GO:0016491,oxidoreductase activity|GO:0043169,cation binding|GO:0046914,transition metal ion binding|GO:0015077,monovalent inorganic cation transmembrane transporter activity|GO:0043167,ion binding|GO:0046872,metal ion binding|GO:0015002,heme-copper terminal oxidase activity|GO:0004129,cytochrome-c oxidase activity|GO:0005215,transporter activity|GO:0008324,cation transmembrane…
O75083	1.84165	0.881	O75083	WDR1	GO:0007599,hemostasis|GO:0051049,regulation of transport|GO:0007596,blood coagulation|GO:0048468,cell development|GO:0008064,regulation of actin polymerization or depolymerization|GO:0034765,regulation of ion transmembrane transport|GO:0034762,regulation of transmembrane transport|GO:0048869,cellular developmental process|GO:0051495,positive regulation of cytoskeleton organization|GO:0051493,regu…	GO:0042995,cell projection|GO:0015629,actin cytoskeleton|GO:0043229,intracellular organelle|GO:0043228,non-membrane-bounded organelle|GO:0043227,membrane-bounded organelle|GO:0043226,organelle|GO:0030054,cell junction|GO:0005856,cytoskeleton|GO:0002102,podosome|GO:0031982,vesicle|GO:0043209,myelin sheath|GO:0031988,membrane-bounded vesicle|GO:0044430,cytoskeletal part|GO:0005737,cytoplasm|GO:0005…	GO:0003779,actin binding|GO:0005488,binding|GO:0005515,protein binding|GO:0008092,cytoskeletal protein binding|GO:0051015,actin filament binding|GO:0044877,macromolecular complex binding|GO:0032403,protein complex binding
P23368	1.83655	0.877	P23368	ME2	GO:0006739,NADP metabolic process|GO:0019220,regulation of phosphate metabolic process|GO:0080090,regulation of primary metabolic process|GO:0019222,regulation of metabolic process|GO:0006732,coenzyme metabolic process|GO:0006733,oxidoreduction coenzyme metabolic process|GO:0031323,regulation of cellular metabolic process|GO:0019752,carboxylic acid metabolic process|GO:0034641,cellular nitrogen c…	GO:0005737,cytoplasm|GO:0043231,intracellular membrane-bounded organelle|GO:0043233,organelle lumen|GO:0044464,cell part|GO:0044444,cytoplasmic part|GO:0031974,membrane-enclosed lumen|GO:0005622,intracellular|GO:0044446,intracellular organelle part|GO:0070013,intracellular organelle lumen|GO:0043229,intracellular organelle|GO:0005739,mitochondrion|GO:0044429,mitochondrial part|GO:0005759,mitochon…	GO:0051287,NAD binding|GO:0008948,oxaloacetate decarboxylase activity|GO:0005488,binding|GO:0000166,nucleotide binding|GO:1901363,heterocyclic compound binding|GO:1901265,nucleoside phosphate binding|GO:0016491,oxidoreductase activity|GO:0043169,cation binding|GO:0016829,lyase activity|GO:0043167,ion binding|GO:0046872,metal ion binding|GO:0050662,coenzyme binding|GO:0036094,small molecule bindin…	hsa00620,Pyruvate metabolism|hsa01200,Carbon metabolism
Q16555	1.77276	0.826	Q16555	DPYSL2	GO:0048675,axon extension|GO:0048589,developmental growth|GO:0051047,positive regulation of secretion|GO:0051049,regulation of transport|GO:0048468,cell development|GO:0021510,spinal cord development|GO:0006820,anion transport|GO:0060322,head development|GO:0007165,signal transduction|GO:0051641,cellular localization|GO:0061387,regulation of extent of cell growth|GO:0031344,regulation of cell pro…	GO:0042995,cell projection|GO:0030427,site of polarized growth|GO:0030426,growth cone|GO:0030425,dendrite|GO:0030424,axon|GO:0043229,intracellular organelle|GO:0043228,non-membrane-bounded organelle|GO:0045202,synapse|GO:0005874,microtubule|GO:0043226,organelle|GO:0005856,cytoskeleton|GO:0043679,axon terminus|GO:0044306,neuron projection terminus|GO:0070062,extracellular exosome|GO:0043209,myelin…	GO:0016787,hydrolase activity|GO:0015631,tubulin binding|GO:0019900,kinase binding|GO:0008092,cytoskeletal protein binding|GO:0016812,hydrolase activity, acting on carbon-nitrogen (but not peptide) bonds, in cyclic amides|GO:0016810,hydrolase activity, acting on carbon-nitrogen (but not peptide) bonds|GO:0019899,enzyme binding|GO:0019901,protein kinase binding|GO:0003824,catalytic activity|GO:004…	hsa04360,Axon guidance
Q12907	1.76174	0.817	Q12907	LMAN2	GO:0008104,protein localization|GO:0006909,phagocytosis|GO:0050794,regulation of cellular process|GO:0051049,regulation of transport|GO:0051128,regulation of cellular component organization|GO:0050789,regulation of biological process|GO:0044699,single-organism process|GO:0050766,positive regulation of phagocytosis|GO:0050764,regulation of phagocytosis|GO:0051234,establishment of localization|GO:0…	GO:0005783,endoplasmic reticulum|GO:0033116,endoplasmic reticulum-Golgi intermediate compartment membrane|GO:0005789,endoplasmic reticulum membrane|GO:0042175,nuclear outer membrane-endoplasmic reticulum membrane network|GO:0043229,intracellular organelle|GO:0071944,cell periphery|GO:0005622,intracellular|GO:0043227,membrane-bounded organelle|GO:0043226,organelle|GO:0031224,intrinsic component of…	GO:0001948,glycoprotein binding|GO:0043169,cation binding|GO:0097367,carbohydrate derivative binding|GO:0031072,heat shock protein binding|GO:0030246,carbohydrate binding|GO:0043167,ion binding|GO:0048029,monosaccharide binding|GO:0005515,protein binding|GO:0046872,metal ion binding|GO:0005537,mannose binding|GO:0005488,binding|GO:0036094,small molecule binding	hsa04141,Protein processing in endoplasmic reticulum
P51648	1.76174	0.817	P51648	ALDH3A2	GO:0006714,sesquiterpenoid metabolic process|GO:0044281,small molecule metabolic process|GO:0008544,epidermis development|GO:0044255,cellular lipid metabolic process|GO:0007275,multicellular organism development|GO:0044699,single-organism process|GO:0007417,central nervous system development|GO:0044710,single-organism metabolic process|GO:0071704,organic substance metabolic process|GO:0016101,dit…	GO:0005783,endoplasmic reticulum|GO:0044464,cell part|GO:0031090,organelle membrane|GO:0005789,endoplasmic reticulum membrane|GO:0042579,microbody|GO:0043229,intracellular organelle|GO:0043227,membrane-bounded organelle|GO:0043226,organelle|GO:0031224,intrinsic component of membrane|GO:0005737,cytoplasm|GO:0031982,vesicle|GO:0031975,envelope|GO:0016021,integral component of membrane|GO:0016020,me…	GO:0046577,long-chain-alcohol oxidase activity|GO:0016614,oxidoreductase activity, acting on CH-OH group of donors|GO:0004029,aldehyde dehydrogenase (NAD) activity|GO:0016620,oxidoreductase activity, acting on the aldehyde or oxo group of donors, NAD or NADP as acceptor|GO:0003824,catalytic activity|GO:0004030,aldehyde dehydrogenase [NAD(P)+] activity|GO:0050061,long-chain-aldehyde dehydrogenase …	hsa00310,Lysine degradation|hsa00561,Glycerolipid metabolism|hsa00380,Tryptophan metabolism|hsa00330,Arginine and proline metabolism|hsa00620,Pyruvate metabolism|hsa00410,beta-Alanine metabolism|hsa00071,Fatty acid degradation|hsa00280,Valine, leucine and isoleucine degradation|hsa00053,Ascorbate and aldarate metabolism|hsa00010,Glycolysis / Gluconeogenesis|hsa01100,Metabolic pathways|hsa00340,Hi…		D00123,Cyanamide (JP16); Cyanamide (TN)|D00131,Disulfiram (JP16/USP/INN); Antabuse (TN)
P15880	1.69114	0.758	P15880	RPS2	GO:0008104,protein localization|GO:0019222,regulation of metabolic process|GO:0061024,membrane organization|GO:1901362,organic cyclic compound biosynthetic process|GO:1901360,organic cyclic compound metabolic process|GO:1901361,organic cyclic compound catabolic process|GO:0070727,cellular macromolecule localization|GO:0043043,peptide biosynthetic process|GO:0044419,interspecies interaction betwee…	GO:0022626,cytosolic ribosome|GO:0022627,cytosolic small ribosomal subunit|GO:0031974,membrane-enclosed lumen|GO:0043229,intracellular organelle|GO:0043228,non-membrane-bounded organelle|GO:0005924,cell-substrate adherens junction|GO:0005925,focal adhesion|GO:0043227,membrane-bounded organelle|GO:0043226,organelle|GO:0030054,cell junction|GO:0015935,small ribosomal subunit|GO:0005737,cytoplasm|GO…	GO:0005488,binding|GO:0019899,enzyme binding|GO:0005515,protein binding|GO:0097159,organic cyclic compound binding|GO:0044822,poly(A) RNA binding|GO:0019838,growth factor binding|GO:0017134,fibroblast growth factor binding|GO:0005198,structural molecule activity|GO:0003735,structural constituent of ribosome|GO:0003723,RNA binding|GO:0003676,nucleic acid binding|GO:1901363,heterocyclic compound bi…	hsa03010,Ribosome
A0FGR8	1.56049	0.642	A0FGR8	ESYT2	GO:0033036,macromolecule localization|GO:0006897,endocytosis|GO:0016192,vesicle-mediated transport|GO:0006869,lipid transport|GO:0006810,transport|GO:0044765,single-organism transport|GO:1902578,single-organism localization|GO:0071702,organic substance transport|GO:0051234,establishment of localization|GO:0010876,lipid localization|GO:0051179,localization|GO:0044699,single-organism process|GO:000…	GO:0019897,extrinsic component of plasma membrane|GO:0005783,endoplasmic reticulum|GO:0009898,cytoplasmic side of plasma membrane|GO:0005789,endoplasmic reticulum membrane|GO:0042175,nuclear outer membrane-endoplasmic reticulum membrane network|GO:0043229,intracellular organelle|GO:0071944,cell periphery|GO:0031300,intrinsic component of organelle membrane|GO:0098552,side of membrane|GO:0031226,i…	GO:0043168,anion binding|GO:0043169,cation binding|GO:0008429,phosphatidylethanolamine binding|GO:0043178,alcohol binding|GO:0035091,phosphatidylinositol binding|GO:0005543,phospholipid binding|GO:0005544,calcium-dependent phospholipid binding|GO:0008289,lipid binding|GO:0050997,quaternary ammonium group binding|GO:0043167,ion binding|GO:0070405,ammonium ion binding|GO:0031210,phosphatidylcholine…
P98160	0.65884	-0.602	P98160	HSPG2	GO:0008104,protein localization|GO:0001501,skeletal system development|GO:0072359,circulatory system development|GO:0001503,ossification|GO:0007165,signal transduction|GO:0071840,cellular component organization or biogenesis|GO:0044710,single-organism metabolic process|GO:0044711,single-organism biosynthetic process|GO:0048869,cellular developmental process|GO:0048513,animal organ development|GO:…	GO:0000323,lytic vacuole|GO:0044421,extracellular region part|GO:0031974,membrane-enclosed lumen|GO:0031012,extracellular matrix|GO:0043229,intracellular organelle|GO:0071944,cell periphery|GO:0005924,cell-substrate adherens junction|GO:0005925,focal adhesion|GO:0043227,membrane-bounded organelle|GO:0043226,organelle|GO:0030054,cell junction|GO:0030055,cell-substrate junction|GO:0005737,cytoplasm…	GO:0043169,cation binding|GO:0008022,protein C-terminus binding|GO:0043167,ion binding|GO:0005488,binding|GO:0005515,protein binding|GO:0046872,metal ion binding|GO:0070325,lipoprotein particle receptor binding|GO:0005509,calcium ion binding|GO:0005102,receptor binding|GO:0050750,low-density lipoprotein particle receptor binding|GO:0005178,integrin binding|GO:0005201,extracellular matrix structur…	hsa05205,Proteoglycans in cancer|hsa04512,ECM-receptor interaction|hsa05161,Hepatitis B
Q6NZI2	0.623301	-0.682	Q6NZI2	CAVIN1	GO:0080090,regulation of primary metabolic process|GO:0019222,regulation of metabolic process|GO:0031326,regulation of cellular biosynthetic process|GO:0031323,regulation of cellular metabolic process|GO:0090304,nucleic acid metabolic process|GO:0044249,cellular biosynthetic process|GO:0034641,cellular nitrogen compound metabolic process|GO:0006807,nitrogen compound metabolic process|GO:0034645,c…	GO:0098590,plasma membrane region|GO:0005783,endoplasmic reticulum|GO:0031974,membrane-enclosed lumen|GO:0005901,caveola|GO:0043229,intracellular organelle|GO:0071944,cell periphery|GO:0044853,plasma membrane raft|GO:0043227,membrane-bounded organelle|GO:0043226,organelle|GO:0005737,cytoplasm|GO:0031981,nuclear lumen|GO:0005634,nucleus|GO:0016020,membrane|GO:0005739,mitochondrion|GO:0005654,nucle…	GO:0042134,rRNA primary transcript binding|GO:0005515,protein binding|GO:0097159,organic cyclic compound binding|GO:0044822,poly(A) RNA binding|GO:0019843,rRNA binding|GO:0003723,RNA binding|GO:0003676,nucleic acid binding|GO:1901363,heterocyclic compound binding|GO:0005488,binding|GO:0042802,identical protein binding
P02774	0.614719	-0.702	P02774	GC	GO:0009991,response to extracellular stimulus|GO:0006775,fat-soluble vitamin metabolic process|GO:0007595,lactation|GO:0032355,response to estradiol|GO:0014070,response to organic cyclic compound|GO:0032941,secretion by tissue|GO:0044281,small molecule metabolic process|GO:0007275,multicellular organism development|GO:0044699,single-organism process|GO:0009719,response to endogenous stimulus|GO:0…	GO:0042995,cell projection|GO:0000323,lytic vacuole|GO:0031974,membrane-enclosed lumen|GO:0030424,axon|GO:0043229,intracellular organelle|GO:0072562,blood microparticle|GO:0043227,membrane-bounded organelle|GO:0043226,organelle|GO:0005737,cytoplasm|GO:0044446,intracellular organelle part|GO:0043202,lysosomal lumen|GO:0070062,extracellular exosome|GO:0005773,vacuole|GO:0005615,extracellular space|…	GO:0003779,actin binding|GO:1902271,D3 vitamins binding|GO:0051183,vitamin transporter activity|GO:0043178,alcohol binding|GO:0005215,transporter activity|GO:0008092,cytoskeletal protein binding|GO:0008289,lipid binding|GO:0019842,vitamin binding|GO:0036094,small molecule binding|GO:0005496,steroid binding|GO:0005488,binding|GO:0005515,protein binding|GO:0005499,vitamin D binding|GO:1902118,calci…
P40939	0.581963	-0.781	P40939	HADHA	GO:0034440,lipid oxidation|GO:0006631,fatty acid metabolic process|GO:0006650,glycerophospholipid metabolic process|GO:0006635,fatty acid beta-oxidation|GO:0050896,response to stimulus|GO:0032048,cardiolipin metabolic process|GO:0019752,carboxylic acid metabolic process|GO:0044248,cellular catabolic process|GO:0009062,fatty acid catabolic process|GO:0044281,small molecule metabolic process|GO:004…	GO:0044464,cell part|GO:0031974,membrane-enclosed lumen|GO:0031975,envelope|GO:0043229,intracellular organelle|GO:0043228,non-membrane-bounded organelle|GO:0042645,mitochondrial nucleoid|GO:0043227,membrane-bounded organelle|GO:0043226,organelle|GO:0005737,cytoplasm|GO:0031090,organelle membrane|GO:0070013,intracellular organelle lumen|GO:0036125,fatty acid beta-oxidation multienzyme complex|GO:0…	GO:0051287,NAD binding|GO:0044877,macromolecular complex binding|GO:0005488,binding|GO:0003857,3-hydroxyacyl-CoA dehydrogenase activity|GO:1901363,heterocyclic compound binding|GO:1901265,nucleoside phosphate binding|GO:0016491,oxidoreductase activity|GO:1901681,sulfur compound binding|GO:0050662,coenzyme binding|GO:0016829,lyase activity|GO:0000062,fatty-acyl-CoA binding|GO:0000166,nucleotide bi…	hsa00310,Lysine degradation|hsa00062,Fatty acid elongation|hsa01100,Metabolic pathways|hsa00071,Fatty acid degradation|hsa01200,Carbon metabolism|hsa00280,Valine, leucine and isoleucine degradation|hsa00640,Propanoate metabolism|hsa00380,Tryptophan metabolism|hsa01212,Fatty acid metabolism|hsa00650,Butanoate metabolism|hsa00410,beta-Alanine metabolism
A0A024R8Z1	0.530712	-0.914	A0A024R8Z1	MGST3	GO:0050896,response to stimulus|GO:0010033,response to organic substance|GO:0010243,response to organonitrogen compound|GO:0042221,response to chemical|GO:1901698,response to nitrogen compound	GO:0044425,membrane part|GO:0016021,integral component of membrane|GO:0016020,membrane|GO:0031224,intrinsic component of membrane	GO:0016209,antioxidant activity|GO:0003824,catalytic activity|GO:0016740,transferase activity|GO:0016684,oxidoreductase activity, acting on peroxide as acceptor|GO:0004601,peroxidase activity|GO:0004602,glutathione peroxidase activity|GO:0016491,oxidoreductase activity
P62269	0.520872	-0.941	P62269	RPS18	GO:0008104,protein localization|GO:0061024,membrane organization|GO:1901362,organic cyclic compound biosynthetic process|GO:1901360,organic cyclic compound metabolic process|GO:1901361,organic cyclic compound catabolic process|GO:0070727,cellular macromolecule localization|GO:0043043,peptide biosynthetic process|GO:0044419,interspecies interaction between organisms|GO:0019058,viral life cycle|GO:…	GO:0022626,cytosolic ribosome|GO:0022627,cytosolic small ribosomal subunit|GO:0043229,intracellular organelle|GO:0043228,non-membrane-bounded organelle|GO:0005924,cell-substrate adherens junction|GO:0005925,focal adhesion|GO:0043227,membrane-bounded organelle|GO:0043226,organelle|GO:0030054,cell junction|GO:0015935,small ribosomal subunit|GO:0005737,cytoplasm|GO:0031982,vesicle|GO:0005634,nucleus…	GO:0005515,protein binding|GO:0097159,organic cyclic compound binding|GO:0044822,poly(A) RNA binding|GO:0019843,rRNA binding|GO:0003735,structural constituent of ribosome|GO:0003723,RNA binding|GO:0003676,nucleic acid binding|GO:0005198,structural molecule activity|GO:1901363,heterocyclic compound binding|GO:0005488,binding|GO:0019901,protein kinase binding|GO:0019899,enzyme binding|GO:0019900,ki…	hsa03010,Ribosome
Q969G5	0.510506	-0.97	Q969G5	CAVIN3	GO:0032922,circadian regulation of gene expression|GO:0019220,regulation of phosphate metabolic process|GO:0080090,regulation of primary metabolic process|GO:0019222,regulation of metabolic process|GO:0048585,negative regulation of response to stimulus|GO:0048584,positive regulation of response to stimulus|GO:0048583,regulation of response to stimulus|GO:0051898,negative regulation of protein kin…	GO:0043234,protein complex|GO:0098590,plasma membrane region|GO:0098589,membrane region|GO:0032991,macromolecular complex|GO:0098805,whole membrane|GO:0045121,membrane raft|GO:0044464,cell part|GO:0005623,cell|GO:0005737,cytoplasm|GO:0016020,membrane|GO:0005901,caveola|GO:0071944,cell periphery|GO:0005886,plasma membrane|GO:0044424,intracellular part|GO:0044425,membrane part|GO:0044853,plasma mem…	GO:0005080,protein kinase C binding|GO:0019899,enzyme binding|GO:0019901,protein kinase binding|GO:0019900,kinase binding|GO:0005488,binding|GO:0005515,protein binding
P06733	0.507331	-0.979	P06733	ENO1	GO:0080090,regulation of primary metabolic process|GO:0019222,regulation of metabolic process|GO:0009167,purine ribonucleoside monophosphate metabolic process|GO:0061621,canonical glycolysis|GO:0061620,glycolytic process through glucose-6-phosphate|GO:0044281,small molecule metabolic process|GO:0009161,ribonucleoside monophosphate metabolic process|GO:1901362,organic cyclic compound biosynthetic …	GO:0031672,A band|GO:0030016,myofibril|GO:0030017,sarcomere|GO:0043229,intracellular organelle|GO:0043228,non-membrane-bounded organelle|GO:0043227,membrane-bounded organelle|GO:0043226,organelle|GO:0005737,cytoplasm|GO:0031430,M band|GO:0031982,vesicle|GO:0005615,extracellular space|GO:0005634,nucleus|GO:0016020,membrane|GO:0031988,membrane-bounded vesicle|GO:0005576,extracellular region|GO:0043…	GO:0000287,magnesium ion binding|GO:0019899,enzyme binding|GO:0051020,GTPase binding|GO:0005488,binding|GO:0003676,nucleic acid binding|GO:0003677,DNA binding|GO:1901363,heterocyclic compound binding|GO:0043169,cation binding|GO:0016829,lyase activity|GO:0003714,transcription corepressor activity|GO:0003712,transcription cofactor activity|GO:0043167,ion binding|GO:0000989,transcription factor act…	hsa01100,Metabolic pathways|hsa01200,Carbon metabolism|hsa04066,HIF-1 signaling pathway|hsa01230,Biosynthesis of amino acids|hsa00010,Glycolysis / Gluconeogenesis|hsa03018,RNA degradation
Q9Y678	0.47533	-1.073	Q9Y678	COPG1	GO:0008104,protein localization|GO:0048200,Golgi transport vesicle coating|GO:0072384,organelle transport along microtubule|GO:0051649,establishment of localization in cell|GO:0006901,vesicle coating|GO:0048205,COPI coating of Golgi vesicle|GO:0006903,vesicle targeting|GO:0006928,movement of cell or subcellular component|GO:0061024,membrane organization|GO:0051640,organelle localization|GO:005165…	GO:0043229,intracellular organelle|GO:0030117,membrane coat|GO:0005622,intracellular|GO:0030135,coated vesicle|GO:0043226,organelle|GO:0030137,COPI-coated vesicle|GO:0005737,cytoplasm|GO:0030660,Golgi-associated vesicle membrane|GO:0030663,COPI-coated vesicle membrane|GO:0030662,coated vesicle membrane|GO:0016023,cytoplasmic, membrane-bounded vesicle|GO:0031410,cytoplasmic vesicle|GO:0098805,whol…	GO:0005488,binding|GO:0005515,protein binding|GO:0005198,structural molecule activity
P02652	0.459456	-1.122	P02652	APOA2	GO:1901566,organonitrogen compound biosynthetic process|GO:0008104,protein localization|GO:0080090,regulation of primary metabolic process|GO:0019222,regulation of metabolic process|GO:0046340,diacylglycerol catabolic process|GO:0051048,negative regulation of secretion|GO:0051049,regulation of transport|GO:0048585,negative regulation of response to stimulus|GO:0048583,regulation of response to st…	GO:0005783,endoplasmic reticulum|GO:0044421,extracellular region part|GO:0031974,membrane-enclosed lumen|GO:0043229,intracellular organelle|GO:1990777,lipoprotein particle|GO:0005622,intracellular|GO:0043227,membrane-bounded organelle|GO:0043226,organelle|GO:0034358,plasma lipoprotein particle|GO:0005737,cytoplasm|GO:0042627,chylomicron|GO:0070062,extracellular exosome|GO:0005615,extracellular sp…	GO:0017127,cholesterol transporter activity|GO:0044877,macromolecular complex binding|GO:0008047,enzyme activator activity|GO:0004857,enzyme inhibitor activity|GO:0098772,molecular function regulator|GO:0060228,phosphatidylcholine-sterol O-acyltransferase activator activity|GO:0034190,apolipoprotein receptor binding|GO:0043168,anion binding|GO:0043169,cation binding|GO:0055102,lipase inhibitor ac…	hsa04979,Cholesterol metabolism|hsa03320,PPAR signaling pathway
P53396	0.450001	-1.152	P53396	ACLY	GO:0019222,regulation of metabolic process|GO:0044281,small molecule metabolic process|GO:0044283,small molecule biosynthetic process|GO:0072350,tricarboxylic acid metabolic process|GO:1901360,organic cyclic compound metabolic process|GO:0044710,single-organism metabolic process|GO:0044711,single-organism biosynthetic process|GO:0055086,nucleobase-containing small molecule metabolic process|GO:00…	GO:0031974,membrane-enclosed lumen|GO:0043229,intracellular organelle|GO:0071944,cell periphery|GO:0043227,membrane-bounded organelle|GO:0043226,organelle|GO:0005737,cytoplasm|GO:0070062,extracellular exosome|GO:0031981,nuclear lumen|GO:0005634,nucleus|GO:0016020,membrane|GO:0005739,mitochondrion|GO:0031988,membrane-bounded vesicle|GO:0005654,nucleoplasm|GO:0009346,citrate lyase complex|GO:000588…	GO:0035639,purine ribonucleoside triphosphate binding|GO:0003878,ATP citrate synthase activity|GO:0005488,binding|GO:0043167,ion binding|GO:1901363,heterocyclic compound binding|GO:1901265,nucleoside phosphate binding|GO:0001882,nucleoside binding|GO:0046912,transferase activity, transferring acyl groups, acyl groups converted into alkyl on transfer|GO:0043169,cation binding|GO:0000166,nucleotide…	hsa01100,Metabolic pathways|hsa00020,Citrate cycle (TCA cycle)		D10691,Bempedoic acid (USAN/INN)
P62266	0.437392	-1.193	P62266	RPS23	GO:0008104,protein localization|GO:0061024,membrane organization|GO:1901362,organic cyclic compound biosynthetic process|GO:1901360,organic cyclic compound metabolic process|GO:1901361,organic cyclic compound catabolic process|GO:0070727,cellular macromolecule localization|GO:0043043,peptide biosynthetic process|GO:0044419,interspecies interaction between organisms|GO:0019058,viral life cycle|GO:…	GO:0022626,cytosolic ribosome|GO:0022627,cytosolic small ribosomal subunit|GO:0031974,membrane-enclosed lumen|GO:0043229,intracellular organelle|GO:0043228,non-membrane-bounded organelle|GO:0043227,membrane-bounded organelle|GO:0043226,organelle|GO:0015935,small ribosomal subunit|GO:0005737,cytoplasm|GO:0031981,nuclear lumen|GO:0005730,nucleolus|GO:0005634,nucleus|GO:0016020,membrane|GO:0030529,i…	GO:0005515,protein binding|GO:0097159,organic cyclic compound binding|GO:0044822,poly(A) RNA binding|GO:0005198,structural molecule activity|GO:0003735,structural constituent of ribosome|GO:0003723,RNA binding|GO:0003676,nucleic acid binding|GO:1901363,heterocyclic compound binding|GO:0005488,binding	hsa03010,Ribosome
P35579	0.4222	-1.244	P35579	MYH9	GO:0008104,protein localization|GO:0006909,phagocytosis|GO:0080090,regulation of primary metabolic process|GO:0019222,regulation of metabolic process|GO:0030224,monocyte differentiation|GO:0048585,negative regulation of response to stimulus|GO:0007596,blood coagulation|GO:0048583,regulation of response to stimulus|GO:0030220,platelet formation|GO:0061024,membrane organization|GO:0008277,regulatio…	GO:0032432,actin filament bundle|GO:0005911,cell-cell junction|GO:0098636,protein complex involved in cell adhesion|GO:0016020,membrane|GO:0015629,actin cytoskeleton|GO:0030055,cell-substrate junction|GO:0005886,plasma membrane|GO:0097610,cell surface furrow|GO:0031594,neuromuscular junction|GO:0043229,intracellular organelle|GO:0043228,non-membrane-bounded organelle|GO:0045202,synapse|GO:0005887…	GO:0003676,nucleic acid binding|GO:0035639,purine ribonucleoside triphosphate binding|GO:0043495,protein anchor|GO:0044877,macromolecular complex binding|GO:0005488,binding|GO:0016887,ATPase activity|GO:0043167,ion binding|GO:1901363,heterocyclic compound binding|GO:0001883,purine nucleoside binding|GO:0001882,nucleoside binding|GO:0043168,anion binding|GO:0000146,microfilament motor activity|GO:…	hsa04530,Tight junction|hsa05130,Pathogenic Escherichia coli infection|hsa04810,Regulation of actin cytoskeleton
P02749	0.419284	-1.254	P02749	APOH	GO:0007599,hemostasis|GO:0019222,regulation of metabolic process|GO:0048585,negative regulation of response to stimulus|GO:0048584,positive regulation of response to stimulus|GO:0048583,regulation of response to stimulus|GO:0050680,negative regulation of epithelial cell proliferation|GO:0031638,zymogen activation|GO:0072359,circulatory system development|GO:0072358,cardiovascular system developme…	GO:0034358,plasma lipoprotein particle|GO:0031012,extracellular matrix|GO:1990777,lipoprotein particle|GO:0043227,membrane-bounded organelle|GO:0043226,organelle|GO:0042627,chylomicron|GO:0070062,extracellular exosome|GO:0031988,membrane-bounded vesicle|GO:0034361,very-low-density lipoprotein particle|GO:0034364,high-density lipoprotein particle|GO:0009986,cell surface|GO:0031982,vesicle|GO:00329…	GO:1901681,sulfur compound binding|GO:0043168,anion binding|GO:0005543,phospholipid binding|GO:0097367,carbohydrate derivative binding|GO:0030234,enzyme regulator activity|GO:0060230,lipoprotein lipase activator activity|GO:0008289,lipid binding|GO:0008201,heparin binding|GO:0005539,glycosaminoglycan binding|GO:0043167,ion binding|GO:0008047,enzyme activator activity|GO:0005515,protein binding|GO…	hsa04979,Cholesterol metabolism
P40121	0.417833	-1.259	P40121	CAPG	GO:0022607,cellular component assembly|GO:0006461,protein complex assembly|GO:0033043,regulation of organelle organization|GO:0030030,cell projection organization|GO:0030031,cell projection assembly|GO:1901879,regulation of protein depolymerization|GO:0051129,negative regulation of cellular component organization|GO:0051128,regulation of cellular component organization|GO:0008064,regulation of ac…	GO:0015629,actin cytoskeleton|GO:0044464,cell part|GO:0048770,pigment granule|GO:0031974,membrane-enclosed lumen|GO:0043229,intracellular organelle|GO:0043228,non-membrane-bounded organelle|GO:0031988,membrane-bounded vesicle|GO:0043227,membrane-bounded organelle|GO:0043226,organelle|GO:0005856,cytoskeleton|GO:0072686,mitotic spindle|GO:0070062,extracellular exosome|GO:0031981,nuclear lumen|GO:00…	GO:0008092,cytoskeletal protein binding|GO:0003779,actin binding|GO:0044877,macromolecular complex binding|GO:0019904,protein domain specific binding|GO:0005515,protein binding|GO:0032403,protein complex binding|GO:0005488,binding|GO:0051015,actin filament binding|GO:0045296,cadherin binding|GO:0050839,cell adhesion molecule binding
Q9UBG0	0.384219	-1.38	Q9UBG0	MRC2	GO:0044259,multicellular organismal macromolecule metabolic process|GO:0030154,cell differentiation|GO:0001503,ossification|GO:0032963,collagen metabolic process|GO:0043170,macromolecule metabolic process|GO:0044699,single-organism process|GO:0044712,single-organism catabolic process|GO:0044710,single-organism metabolic process|GO:0044243,multicellular organismal catabolic process|GO:0048869,cell…	GO:0016020,membrane|GO:0016021,integral component of membrane|GO:0070161,anchoring junction|GO:0031224,intrinsic component of membrane|GO:0005912,adherens junction|GO:0044425,membrane part|GO:0005924,cell-substrate adherens junction|GO:0005925,focal adhesion|GO:0030054,cell junction|GO:0030055,cell-substrate junction|GO:0044459,plasma membrane part|GO:0044464,cell part|GO:0005623,cell|GO:0071944,…	GO:0030246,carbohydrate binding|GO:0044877,macromolecular complex binding|GO:0005488,binding|GO:0005515,protein binding|GO:0032403,protein complex binding|GO:0005518,collagen binding|GO:0038023,signaling receptor activity|GO:0060089,molecular transducer activity|GO:0004888,transmembrane signaling receptor activity|GO:0004872,receptor activity|GO:0004871,signal transducer activity|GO:0099600,trans…	hsa04145,Phagosome|hsa05152,Tuberculosis
P19971	0.366783	-1.447	P19971	TYMP	GO:0009164,nucleoside catabolic process|GO:0072358,cardiovascular system development|GO:0009163,nucleoside biosynthetic process|GO:0046134,pyrimidine nucleoside biosynthetic process|GO:0046135,pyrimidine nucleoside catabolic process|GO:1901362,organic cyclic compound biosynthetic process|GO:0044707,single-multicellular organism process|GO:1901360,organic cyclic compound metabolic process|GO:19013…	GO:0005737,cytoplasm|GO:0005829,cytosol|GO:0044464,cell part|GO:0005623,cell|GO:0005622,intracellular|GO:0044444,cytoplasmic part|GO:0044424,intracellular part	GO:0070851,growth factor receptor binding|GO:0008083,growth factor activity|GO:0016154,pyrimidine-nucleoside phosphorylase activity|GO:0009032,thymidine phosphorylase activity|GO:0005161,platelet-derived growth factor receptor binding|GO:0004645,phosphorylase activity|GO:0003824,catalytic activity|GO:0016740,transferase activity|GO:0005515,protein binding|GO:0016757,transferase activity, transfer…	hsa00983,Drug metabolism - other enzymes|hsa05219,Bladder cancer|hsa01100,Metabolic pathways|hsa00240,Pyrimidine metabolism
Q9Y6C2	0.338681	-1.562	Q9Y6C2	EMILIN1	GO:0009987,cellular process|GO:0016043,cellular component organization|GO:0030198,extracellular matrix organization|GO:0044763,single-organism cellular process|GO:0044699,single-organism process|GO:0043062,extracellular structure organization|GO:0007155,cell adhesion|GO:0022610,biological adhesion|GO:0071840,cellular component organization or biogenesis|GO:0022607,cellular component assembly|GO:0…	GO:0043234,protein complex|GO:0043230,extracellular organelle|GO:0070062,extracellular exosome|GO:0044421,extracellular region part|GO:0043227,membrane-bounded organelle|GO:0031012,extracellular matrix|GO:0043226,organelle|GO:0032991,macromolecular complex|GO:0005576,extracellular region|GO:0005581,collagen trimer|GO:0031988,membrane-bounded vesicle|GO:1903561,extracellular vesicle|GO:0065010,ext…	GO:0005488,binding|GO:0005515,protein binding|GO:0098634,protein binding involved in cell-matrix adhesion|GO:0005178,integrin binding|GO:0005201,extracellular matrix structural constituent|GO:0098631,protein binding involved in cell adhesion|GO:0030023,extracellular matrix constituent conferring elasticity|GO:0005198,structural molecule activity|GO:0044877,macromolecular complex binding|GO:004280…
P04040	0.326465	-1.615	P04040	CAT	GO:0009628,response to abiotic stimulus|GO:0080090,regulation of primary metabolic process|GO:0019222,regulation of metabolic process|GO:0051289,protein homotetramerization|GO:0051260,protein homooligomerization|GO:0048584,positive regulation of response to stimulus|GO:0048583,regulation of response to stimulus|GO:0009166,nucleotide catabolic process|GO:0001503,ossification|GO:0007165,signal tran…	GO:0005782,peroxisomal matrix|GO:0005783,endoplasmic reticulum|GO:0031970,organelle envelope lumen|GO:0031974,membrane-enclosed lumen|GO:0031975,envelope|GO:0042579,microbody|GO:0043229,intracellular organelle|GO:0071944,cell periphery|GO:0000323,lytic vacuole|GO:0005924,cell-substrate adherens junction|GO:0005925,focal adhesion|GO:0043227,membrane-bounded organelle|GO:0043226,organelle|GO:003005…	GO:0019899,enzyme binding|GO:0005488,binding|GO:0043167,ion binding|GO:1901363,heterocyclic compound binding|GO:1901265,nucleoside phosphate binding|GO:0016491,oxidoreductase activity|GO:0043169,cation binding|GO:0050661,NADP binding|GO:0000166,nucleotide binding|GO:0046872,metal ion binding|GO:0042802,identical protein binding|GO:0042803,protein homodimerization activity|GO:0004046,aminoacylase …	hsa01100,Metabolic pathways|hsa00630,Glyoxylate and dicarboxylate metabolism|hsa05014,Amyotrophic lateral sclerosis|hsa01200,Carbon metabolism|hsa04068,FoxO signaling pathway|hsa04146,Peroxisome|hsa04211,Longevity regulating pathway|hsa04213,Longevity regulating pathway - multiple species|hsa00380,Tryptophan metabolism
P00751	0.319303	-1.647	P00751	CFB	GO:0006954,inflammatory response|GO:0030449,regulation of complement activation|GO:0080090,regulation of primary metabolic process|GO:0019222,regulation of metabolic process|GO:0032101,regulation of response to external stimulus|GO:0048584,positive regulation of response to stimulus|GO:0048583,regulation of response to stimulus|GO:0009611,response to wounding|GO:0016485,protein processing|GO:0002…	GO:0043230,extracellular organelle|GO:0031982,vesicle|GO:0044421,extracellular region part|GO:0043227,membrane-bounded organelle|GO:0016020,membrane|GO:0044464,cell part|GO:0005623,cell|GO:0031988,membrane-bounded vesicle|GO:0071944,cell periphery|GO:0005615,extracellular space|GO:0072562,blood microparticle|GO:0005886,plasma membrane|GO:0005576,extracellular region|GO:1903561,extracellular vesic…	GO:0004252,serine-type endopeptidase activity|GO:0004175,endopeptidase activity|GO:0017171,serine hydrolase activity|GO:0016787,hydrolase activity|GO:0003824,catalytic activity|GO:0070011,peptidase activity, acting on L-amino acid peptides|GO:0005488,binding|GO:0005515,protein binding|GO:0001848,complement binding|GO:0008233,peptidase activity|GO:0008236,serine-type peptidase activity|GO:0140096,…	hsa04610,Complement and coagulation cascades|hsa05150,Staphylococcus aureus infection
Q09666	0.314253	-1.67	Q09666	AHNAK	GO:0051252,regulation of RNA metabolic process|GO:0080090,regulation of primary metabolic process|GO:0019222,regulation of metabolic process|GO:0070271,protein complex biogenesis|GO:0043933,macromolecular complex subunit organization|GO:0051049,regulation of transport|GO:0070588,calcium ion transmembrane transport|GO:0031323,regulation of cellular metabolic process|GO:1903169,regulation of calciu…	GO:0000323,lytic vacuole|GO:0015629,actin cytoskeleton|GO:0044421,extracellular region part|GO:0030016,myofibril|GO:0043229,intracellular organelle|GO:0043228,non-membrane-bounded organelle|GO:0005924,cell-substrate adherens junction|GO:0031988,membrane-bounded vesicle|GO:0043227,membrane-bounded organelle|GO:0043226,organelle|GO:0030054,cell junction|GO:0030055,cell-substrate junction|GO:0005856…	GO:0005515,protein binding|GO:0044548,S100 protein binding|GO:0097159,organic cyclic compound binding|GO:0044822,poly(A) RNA binding|GO:0005198,structural molecule activity|GO:0003723,RNA binding|GO:0003676,nucleic acid binding|GO:1901363,heterocyclic compound binding|GO:0097493,structural molecule activity conferring elasticity|GO:0005488,binding|GO:0045296,cadherin binding|GO:0050839,cell adhes…
Q9Y490	0.310572	-1.687	Q9Y490	TLN1	GO:0008104,protein localization|GO:0007599,hemostasis|GO:0007409,axonogenesis|GO:0007596,blood coagulation|GO:0048468,cell development|GO:0003012,muscle system process|GO:0007165,signal transduction|GO:0030182,neuron differentiation|GO:0051651,maintenance of location in cell|GO:0071840,cellular component organization or biogenesis|GO:0051716,cellular response to stimulus|GO:0006986,response to un…	GO:0098590,plasma membrane region|GO:0043229,intracellular organelle|GO:0043228,non-membrane-bounded organelle|GO:0005924,cell-substrate adherens junction|GO:0005925,focal adhesion|GO:0043227,membrane-bounded organelle|GO:0043226,organelle|GO:0030054,cell junction|GO:0030055,cell-substrate junction|GO:0005856,cytoskeleton|GO:0098589,membrane region|GO:0042995,cell projection|GO:0031982,vesicle|GO…	GO:0005178,integrin binding|GO:0005200,structural constituent of cytoskeleton|GO:0005515,protein binding|GO:0008092,cytoskeletal protein binding|GO:0005158,insulin receptor binding|GO:0051015,actin filament binding|GO:0005198,structural molecule activity|GO:0003779,actin binding|GO:0017166,vinculin binding|GO:0044877,macromolecular complex binding|GO:0019904,protein domain specific binding|GO:003…	hsa04015,Rap1 signaling pathway|hsa04611,Platelet activation|hsa05166,Human T-cell leukemia virus 1 infection|hsa04510,Focal adhesion
P21333	0.294431	-1.764	P21333	FLNA	GO:0033157,regulation of intracellular protein transport|GO:0051169,nuclear transport|GO:0043933,macromolecular complex subunit organization|GO:0032388,positive regulation of intracellular transport|GO:0080090,regulation of primary metabolic process|GO:0019222,regulation of metabolic process|GO:0034446,substrate adhesion-dependent cell spreading|GO:0051049,regulation of transport|GO:0032386,regul…	GO:0032432,actin filament bundle|GO:0042995,cell projection|GO:0044463,cell projection part|GO:0015629,actin cytoskeleton|GO:0044421,extracellular region part|GO:0031974,membrane-enclosed lumen|GO:0043229,intracellular organelle|GO:0043228,non-membrane-bounded organelle|GO:0005924,cell-substrate adherens junction|GO:0005925,focal adhesion|GO:0043227,membrane-bounded organelle|GO:0043226,organelle…	GO:0017160,Ral GTPase binding|GO:0005080,protein kinase C binding|GO:0031852,mu-type opioid receptor binding|GO:0017048,Rho GTPase binding|GO:0031267,small GTPase binding|GO:0051020,GTPase binding|GO:0044877,macromolecular complex binding|GO:0005488,binding|GO:0003676,nucleic acid binding|GO:0034987,immunoglobulin receptor binding|GO:0034988,Fc-gamma receptor I complex binding|GO:0001664,G-protei…	hsa05205,Proteoglycans in cancer|hsa05132,Salmonella infection|hsa04510,Focal adhesion|hsa04010,MAPK signaling pathway
P11171	0.284007	-1.816	P11171	EPB41	GO:0030036,actin cytoskeleton organization|GO:0003013,circulatory system process|GO:0071840,cellular component organization or biogenesis|GO:0032092,positive regulation of protein binding|GO:0016043,cellular component organization|GO:0065007,biological regulation|GO:0044699,single-organism process|GO:0044093,positive regulation of molecular function|GO:0065009,regulation of molecular function|GO:…	GO:0015629,actin cytoskeleton|GO:0019898,extrinsic component of membrane|GO:0043229,intracellular organelle|GO:0043228,non-membrane-bounded organelle|GO:0005622,intracellular|GO:0043227,membrane-bounded organelle|GO:0043226,organelle|GO:0005856,cytoskeleton|GO:0005634,nucleus|GO:0016020,membrane|GO:0005737,cytoplasm|GO:0044430,cytoskeletal part|GO:0005794,Golgi apparatus|GO:0014731,spectrin-assoc…	GO:0043168,anion binding|GO:0005200,structural constituent of cytoskeleton|GO:0005515,protein binding|GO:0008092,cytoskeletal protein binding|GO:0035091,phosphatidylinositol binding|GO:0005543,phospholipid binding|GO:0005545,1-phosphatidylinositol binding|GO:0005198,structural molecule activity|GO:0003779,actin binding|GO:0005516,calmodulin binding|GO:0008289,lipid binding|GO:0005488,binding|GO:0…	hsa04530,Tight junction
V9HWP0	0.283025	-1.821	V9HWP0	HEL-S-92N		GO:0005576,extracellular region	GO:0043169,cation binding|GO:0046872,metal ion binding|GO:0005488,binding|GO:0043167,ion binding
P39656	0.275095	-1.862	P39656	DDOST	GO:0008104,protein localization|GO:0061024,membrane organization|GO:0071840,cellular component organization or biogenesis|GO:0044710,single-organism metabolic process|GO:0070727,cellular macromolecule localization|GO:0018196,peptidyl-asparagine modification|GO:0043043,peptide biosynthetic process|GO:0018193,peptidyl-amino acid modification|GO:0033036,macromolecule localization|GO:0006605,protein …	GO:0005783,endoplasmic reticulum|GO:0005789,endoplasmic reticulum membrane|GO:0042175,nuclear outer membrane-endoplasmic reticulum membrane network|GO:0043229,intracellular organelle|GO:0043227,membrane-bounded organelle|GO:0043226,organelle|GO:0031224,intrinsic component of membrane|GO:0005737,cytoplasm|GO:0031090,organelle membrane|GO:0016021,integral component of membrane|GO:0016020,membrane|G…	GO:0005515,protein binding|GO:0003824,catalytic activity|GO:0016740,transferase activity|GO:0004576,oligosaccharyl transferase activity|GO:0005488,binding|GO:0016757,transferase activity, transferring glycosyl groups|GO:0016758,transferase activity, transferring hexosyl groups|GO:0004579,dolichyl-diphosphooligosaccharide-protein glycotransferase activity	hsa04141,Protein processing in endoplasmic reticulum|hsa00513,Various types of N-glycan biosynthesis|hsa00510,N-Glycan biosynthesis|hsa01100,Metabolic pathways
Q6FHL3	0.267387	-1.903	Q6FHL3	TRAM1	GO:0045184,establishment of protein localization|GO:0042886,amide transport|GO:0008104,protein localization|GO:0033036,macromolecule localization|GO:0006810,transport|GO:0071705,nitrogen compound transport|GO:0015833,peptide transport|GO:0071702,organic substance transport|GO:0015031,protein transport|GO:0051234,establishment of localization|GO:0051179,localization	GO:0044425,membrane part|GO:0016021,integral component of membrane|GO:0016020,membrane|GO:0031224,intrinsic component of membrane
P00747	0.26554	-1.913	P00747	PLG	GO:0007599,hemostasis|GO:0048585,negative regulation of response to stimulus|GO:0048584,positive regulation of response to stimulus|GO:0048583,regulation of response to stimulus|GO:0048771,tissue remodeling|GO:0007162,negative regulation of cell adhesion|GO:0071840,cellular component organization or biogenesis|GO:0009611,response to wounding|GO:0048518,positive regulation of biological process|GO…	GO:0019897,extrinsic component of plasma membrane|GO:0009897,external side of plasma membrane|GO:0098552,side of membrane|GO:0031974,membrane-enclosed lumen|GO:0019898,extrinsic component of membrane|GO:0043229,intracellular organelle|GO:0071944,cell periphery|GO:0060205,cytoplasmic membrane-bounded vesicle lumen|GO:0043227,membrane-bounded organelle|GO:0043226,organelle|GO:0005737,cytoplasm|GO:0…	GO:0005488,binding|GO:0004252,serine-type endopeptidase activity|GO:0004175,endopeptidase activity|GO:0017171,serine hydrolase activity|GO:0016787,hydrolase activity|GO:0034185,apolipoprotein binding|GO:0003824,catalytic activity|GO:0070011,peptidase activity, acting on L-amino acid peptides|GO:0019904,protein domain specific binding|GO:0005515,protein binding|GO:0008233,peptidase activity|GO:000…	hsa05164,Influenza A|hsa04080,Neuroactive ligand-receptor interaction|hsa04610,Complement and coagulation cascades|hsa05150,Staphylococcus aureus infection		D00160,Epsilon-Aminocaproic acid (JAN); Aminocaproic acid (USP/INN); Amicar (TN)|D01136,Tranexamic acid (JP16/USAN/INN); Cyklokapron (TN); Rikavarin (TN); Transamin (TN)
P16157	0.257742	-1.956	P16157	ANK1	GO:0008104,protein localization|GO:0048468,cell development|GO:0061024,membrane organization|GO:0007009,plasma membrane organization|GO:0007163,establishment or maintenance of cell polarity|GO:0007165,signal transduction|GO:0090002,establishment of protein localization to plasma membrane|GO:0071840,cellular component organization or biogenesis|GO:0051716,cellular response to stimulus|GO:0097485,n…	GO:0098590,plasma membrane region|GO:0016020,membrane|GO:0005783,endoplasmic reticulum|GO:0030424,axon|GO:0030016,myofibril|GO:0030017,sarcomere|GO:0043229,intracellular organelle|GO:0043228,non-membrane-bounded organelle|GO:0045202,synapse|GO:0044424,intracellular part|GO:0005622,intracellular|GO:0043227,membrane-bounded organelle|GO:0043226,organelle|GO:0030018,Z disc|GO:0097060,synaptic membra…	GO:0030674,protein binding, bridging|GO:0005200,structural constituent of cytoskeleton|GO:0008093,cytoskeletal adaptor activity|GO:0008092,cytoskeletal protein binding|GO:0051117,ATPase binding|GO:0019899,enzyme binding|GO:0005198,structural molecule activity|GO:0005488,binding|GO:0005515,protein binding|GO:0030507,spectrin binding|GO:0060090,binding, bridging|GO:0019903,protein phosphatase bindi…	hsa05205,Proteoglycans in cancer
P98095	0.257742	-1.956	P98095	FBLN2	GO:0031589,cell-substrate adhesion|GO:0045785,positive regulation of cell adhesion|GO:0010810,regulation of cell-substrate adhesion|GO:0010811,positive regulation of cell-substrate adhesion|GO:0030155,regulation of cell adhesion|GO:0009987,cellular process|GO:0016043,cellular component organization|GO:0050794,regulation of cellular process|GO:0007155,cell adhesion|GO:0030198,extracellular matrix …	GO:0043230,extracellular organelle|GO:0070062,extracellular exosome|GO:0044421,extracellular region part|GO:0043227,membrane-bounded organelle|GO:0031012,extracellular matrix|GO:0043226,organelle|GO:0005576,extracellular region|GO:0031988,membrane-bounded vesicle|GO:1903561,extracellular vesicle|GO:0065010,extracellular membrane-bounded organelle|GO:0005578,proteinaceous extracellular matrix|GO:0…	GO:0043169,cation binding|GO:0005201,extracellular matrix structural constituent|GO:0050840,extracellular matrix binding|GO:0005198,structural molecule activity|GO:0043167,ion binding|GO:0005509,calcium ion binding|GO:0046872,metal ion binding|GO:0005488,binding|GO:0030023,extracellular matrix constituent conferring elasticity|GO:0097493,structural molecule activity conferring elasticity
P01009	0.257207	-1.959	P01009	SERPINA1	GO:0006954,inflammatory response|GO:0009892,negative regulation of metabolic process|GO:0080090,regulation of primary metabolic process|GO:0019222,regulation of metabolic process|GO:0006950,response to stress|GO:0031324,negative regulation of cellular metabolic process|GO:0031323,regulation of cellular metabolic process|GO:0032940,secretion by cell|GO:0032501,multicellular organismal process|GO:0…	GO:0005783,endoplasmic reticulum|GO:0044421,extracellular region part|GO:0031974,membrane-enclosed lumen|GO:0031012,extracellular matrix|GO:0043229,intracellular organelle|GO:0060205,cytoplasmic membrane-bounded vesicle lumen|GO:0043227,membrane-bounded organelle|GO:0043226,organelle|GO:0005737,cytoplasm|GO:0031983,vesicle lumen|GO:0070062,extracellular exosome|GO:0031093,platelet alpha granule l…	GO:0001948,glycoprotein binding|GO:0004866,endopeptidase inhibitor activity|GO:0097367,carbohydrate derivative binding|GO:0061135,endopeptidase regulator activity|GO:0061134,peptidase regulator activity|GO:0019899,enzyme binding|GO:0002020,protease binding|GO:0005515,protein binding|GO:0030414,peptidase inhibitor activity|GO:0004867,serine-type endopeptidase inhibitor activity|GO:0004857,enzyme i…	hsa04610,Complement and coagulation cascades
Q05682	0.251042	-1.994	Q05682	CALD1	GO:0032501,multicellular organismal process|GO:0006936,muscle contraction|GO:0044707,single-multicellular organism process|GO:0009987,cellular process|GO:0006928,movement of cell or subcellular component|GO:0003012,muscle system process|GO:0044763,single-organism cellular process|GO:0044699,single-organism process|GO:0003008,system process	GO:0015629,actin cytoskeleton|GO:0030016,myofibril|GO:0043229,intracellular organelle|GO:0043228,non-membrane-bounded organelle|GO:0005622,intracellular|GO:0043226,organelle|GO:0005856,cytoskeleton|GO:0016020,membrane|GO:0044430,cytoskeletal part|GO:0005737,cytoplasm|GO:0030478,actin cap|GO:0044424,intracellular part|GO:0005938,cell cortex|GO:0005886,plasma membrane|GO:0043232,intracellular non-m…	GO:0008092,cytoskeletal protein binding|GO:0017022,myosin binding|GO:0003779,actin binding|GO:0005516,calmodulin binding|GO:0005515,protein binding|GO:0005523,tropomyosin binding|GO:0005488,binding|GO:0045296,cadherin binding|GO:0050839,cell adhesion molecule binding	hsa04270,Vascular smooth muscle contraction
P00568	0.240482	-2.056	P00568	AK1	GO:0009167,purine ribonucleoside monophosphate metabolic process|GO:0009165,nucleotide biosynthetic process|GO:0009163,nucleoside biosynthetic process|GO:0009161,ribonucleoside monophosphate metabolic process|GO:1901362,organic cyclic compound biosynthetic process|GO:0046129,purine ribonucleoside biosynthetic process|GO:0009168,purine ribonucleoside monophosphate biosynthetic process|GO:0044710,s…	GO:0071944,cell periphery|GO:0005929,cilium|GO:0043227,membrane-bounded organelle|GO:0043226,organelle|GO:0001520,outer dense fiber|GO:0005737,cytoplasm|GO:1903561,extracellular vesicle|GO:0031982,vesicle|GO:0031514,motile cilium|GO:0036126,sperm flagellum|GO:0016020,membrane|GO:0097223,sperm part|GO:0031988,membrane-bounded vesicle|GO:0032838,cell projection cytoplasm|GO:0005886,plasma membrane|…	GO:0019201,nucleotide kinase activity|GO:0019205,nucleobase-containing compound kinase activity|GO:0035639,purine ribonucleoside triphosphate binding|GO:0004017,adenylate kinase activity|GO:0005488,binding|GO:0043167,ion binding|GO:1901363,heterocyclic compound binding|GO:0001883,purine nucleoside binding|GO:0001882,nucleoside binding|GO:0043168,anion binding|GO:0000166,nucleotide binding|GO:0016…	hsa00730,Thiamine metabolism|hsa01100,Metabolic pathways|hsa00230,Purine metabolism
P07951	0.236187	-2.082	P07951	TPM2	GO:0019222,regulation of metabolic process|GO:0006928,movement of cell or subcellular component|GO:0003012,muscle system process|GO:0032501,multicellular organismal process|GO:0050789,regulation of biological process|GO:0044699,single-organism process|GO:0043462,regulation of ATPase activity|GO:0006936,muscle contraction|GO:0033275,actin-myosin filament sliding|GO:0065007,biological regulation|GO…	GO:0015629,actin cytoskeleton|GO:0030016,myofibril|GO:0030017,sarcomere|GO:0043229,intracellular organelle|GO:0043228,non-membrane-bounded organelle|GO:0043226,organelle|GO:0005856,cytoskeleton|GO:0044430,cytoskeletal part|GO:0005737,cytoplasm|GO:0044424,intracellular part|GO:0005865,striated muscle thin filament|GO:0005862,muscle thin filament tropomyosin|GO:0036379,myofilament|GO:0043232,intrac…	GO:0008092,cytoskeletal protein binding|GO:0005198,structural molecule activity|GO:0003779,actin binding|GO:0008307,structural constituent of muscle|GO:0005488,binding|GO:0005515,protein binding|GO:0051015,actin filament binding|GO:0044877,macromolecular complex binding|GO:0032403,protein complex binding|GO:0046983,protein dimerization activity|GO:0046982,protein heterodimerization activity|GO:00…	hsa05410,Hypertrophic cardiomyopathy|hsa05414,Dilated cardiomyopathy|hsa04260,Cardiac muscle contraction|hsa04261,Adrenergic signaling in cardiomyocytes
P02511	0.234718	-2.091	P02511	CRYAB	GO:0051234,establishment of localization|GO:0080090,regulation of primary metabolic process|GO:0019222,regulation of metabolic process|GO:0051049,regulation of transport|GO:0032386,regulation of intracellular transport|GO:0032387,negative regulation of intracellular transport|GO:0048468,cell development|GO:0003012,muscle system process|GO:0007165,signal transduction|GO:0023014,signal transduction…	GO:0032432,actin filament bundle|GO:0015629,actin cytoskeleton|GO:0030016,myofibril|GO:0030017,sarcomere|GO:0043229,intracellular organelle|GO:0043228,non-membrane-bounded organelle|GO:0005622,intracellular|GO:0043227,membrane-bounded organelle|GO:0043226,organelle|GO:0030018,Z disc|GO:0005856,cytoskeleton|GO:0031982,vesicle|GO:0043209,myelin sheath|GO:0005634,nucleus|GO:0016020,membrane|GO:00316…	GO:0005488,binding|GO:0043169,cation binding|GO:0015631,tubulin binding|GO:0008092,cytoskeletal protein binding|GO:0008017,microtubule binding|GO:0005212,structural constituent of eye lens|GO:0005198,structural molecule activity|GO:0043167,ion binding|GO:0044877,macromolecular complex binding|GO:0051082,unfolded protein binding|GO:0005515,protein binding|GO:0032403,protein complex binding|GO:0046…	hsa04141,Protein processing in endoplasmic reticulum|hsa04213,Longevity regulating pathway - multiple species
Q59E85	0.229888	-2.121	Q59E85	Q59E85	GO:0044699,single-organism process|GO:0022607,cellular component assembly|GO:0070836,caveola assembly|GO:0009987,cellular process|GO:0010256,endomembrane system organization|GO:0016043,cellular component organization|GO:0031579,membrane raft organization|GO:0061024,membrane organization|GO:0007009,plasma membrane organization|GO:0044085,cellular component biogenesis|GO:0044091,membrane biogenesis…	GO:0098590,plasma membrane region|GO:0005901,caveola|GO:0043229,intracellular organelle|GO:0071944,cell periphery|GO:0044853,plasma membrane raft|GO:0005622,intracellular|GO:0043227,membrane-bounded organelle|GO:0043226,organelle|GO:0031224,intrinsic component of membrane|GO:0005737,cytoplasm|GO:0031984,organelle subcompartment|GO:0031090,organelle membrane|GO:0016021,integral component of membra…
P04275	0.227667	-2.135	P04275	VWF	GO:0022607,cellular component assembly|GO:0007599,hemostasis|GO:0070271,protein complex biogenesis|GO:0043933,macromolecular complex subunit organization|GO:0007597,blood coagulation, intrinsic pathway|GO:0007596,blood coagulation|GO:0032940,secretion by cell|GO:0071840,cellular component organization or biogenesis|GO:0044699,single-organism process|GO:0044710,single-organism metabolic process|GO…	GO:0005783,endoplasmic reticulum|GO:0044421,extracellular region part|GO:0031974,membrane-enclosed lumen|GO:0031012,extracellular matrix|GO:0043229,intracellular organelle|GO:0060205,cytoplasmic membrane-bounded vesicle lumen|GO:0030135,coated vesicle|GO:0043226,organelle|GO:0030136,clathrin-coated vesicle|GO:0005737,cytoplasm|GO:0031983,vesicle lumen|GO:0031982,vesicle|GO:0031093,platelet alpha …	GO:0001948,glycoprotein binding|GO:0005178,integrin binding|GO:0050839,cell adhesion molecule binding|GO:0005515,protein binding|GO:0047485,protein N-terminus binding|GO:0097367,carbohydrate derivative binding|GO:0051087,chaperone binding|GO:0019899,enzyme binding|GO:0019865,immunoglobulin binding|GO:0044877,macromolecular complex binding|GO:0005488,binding|GO:0002020,protease binding|GO:0032403,…	hsa04611,Platelet activation|hsa04610,Complement and coagulation cascades|hsa04512,ECM-receptor interaction|hsa04510,Focal adhesion|hsa05165,Human papillomavirus infection|hsa04151,PI3K-Akt signaling pathway
Q7L576	0.223911	-2.159	Q7L576	CYFIP1	GO:0048675,axon extension|GO:0006909,phagocytosis|GO:0048589,developmental growth|GO:0048588,developmental cell growth|GO:0048584,positive regulation of response to stimulus|GO:0048583,regulation of response to stimulus|GO:0008064,regulation of actin polymerization or depolymerization|GO:0007165,signal transduction|GO:0007166,cell surface receptor signaling pathway|GO:0007167,enzyme linked recept…	GO:0045202,synapse|GO:0005924,cell-substrate adherens junction|GO:0005925,focal adhesion|GO:0043227,membrane-bounded organelle|GO:0043226,organelle|GO:0030054,cell junction|GO:0030055,cell-substrate junction|GO:0005737,cytoplasm|GO:0001726,ruffle|GO:0042995,cell projection|GO:0070062,extracellular exosome|GO:0031988,membrane-bounded vesicle|GO:0097458,neuron part|GO:0034518,RNA cap binding comple…	GO:0019899,enzyme binding|GO:0008092,cytoskeletal protein binding|GO:0051020,GTPase binding|GO:0051015,actin filament binding|GO:0017016,Ras GTPase binding|GO:0003779,actin binding|GO:0031267,small GTPase binding|GO:0048365,Rac GTPase binding|GO:0044877,macromolecular complex binding|GO:0017048,Rho GTPase binding|GO:0005515,protein binding|GO:0032403,protein complex binding|GO:0005488,binding|GO:…	hsa05130,Pathogenic Escherichia coli infection|hsa03013,RNA transport|hsa04810,Regulation of actin cytoskeleton
P10643	0.223137	-2.164	P10643	C7	GO:0006954,inflammatory response|GO:0030449,regulation of complement activation|GO:0080090,regulation of primary metabolic process|GO:0019222,regulation of metabolic process|GO:0032101,regulation of response to external stimulus|GO:0048584,positive regulation of response to stimulus|GO:0048583,regulation of response to stimulus|GO:0009611,response to wounding|GO:0016485,protein processing|GO:0002…	GO:0071944,cell periphery|GO:0031226,intrinsic component of plasma membrane|GO:0043226,organelle|GO:0031224,intrinsic component of membrane|GO:0046930,pore complex|GO:0031982,vesicle|GO:0043227,membrane-bounded organelle|GO:0016021,integral component of membrane|GO:0016020,membrane|GO:0031988,membrane-bounded vesicle|GO:0044459,plasma membrane part|GO:0005887,integral component of plasma membrane…		hsa05322,Systemic lupus erythematosus|hsa04610,Complement and coagulation cascades|hsa05020,Prion diseases
Q99584	0.221442	-2.175	Q99584	S100A13	GO:0008104,protein localization|GO:0048584,positive regulation of response to stimulus|GO:0048583,regulation of response to stimulus|GO:0007165,signal transduction|GO:0050703,interleukin-1 alpha secretion|GO:0071840,cellular component organization or biogenesis|GO:0051716,cellular response to stimulus|GO:0009966,regulation of signal transduction|GO:0009967,positive regulation of signal transducti…	GO:0000323,lytic vacuole|GO:0043229,intracellular organelle|GO:0043227,membrane-bounded organelle|GO:0043226,organelle|GO:0005737,cytoplasm|GO:0031982,vesicle|GO:0005773,vacuole|GO:0005615,extracellular space|GO:0005634,nucleus|GO:0042629,mast cell granule|GO:0031988,membrane-bounded vesicle|GO:0048471,perinuclear region of cytoplasm|GO:1903561,extracellular vesicle|GO:0070062,extracellular exoso…	GO:0005488,binding|GO:0043169,cation binding|GO:0005507,copper ion binding|GO:0046914,transition metal ion binding|GO:0008289,lipid binding|GO:0017134,fibroblast growth factor binding|GO:0043167,ion binding|GO:0019838,growth factor binding|GO:0050786,RAGE receptor binding|GO:0008270,zinc ion binding|GO:0005515,protein binding|GO:0042803,protein homodimerization activity|GO:0046983,protein dimeriz…
P19823	0.217487	-2.201	P19823	ITIH2	GO:0009892,negative regulation of metabolic process|GO:0080090,regulation of primary metabolic process|GO:0019222,regulation of metabolic process|GO:0031324,negative regulation of cellular metabolic process|GO:0031323,regulation of cellular metabolic process|GO:1903510,mucopolysaccharide metabolic process|GO:0006807,nitrogen compound metabolic process|GO:0030203,glycosaminoglycan metabolic proces…	GO:0043230,extracellular organelle|GO:0031982,vesicle|GO:0044421,extracellular region part|GO:0043227,membrane-bounded organelle|GO:0072562,blood microparticle|GO:0031988,membrane-bounded vesicle|GO:0005576,extracellular region|GO:0005615,extracellular space|GO:1903561,extracellular vesicle|GO:0065010,extracellular membrane-bounded organelle|GO:0043226,organelle|GO:0070062,extracellular exosome|G…	GO:0004866,endopeptidase inhibitor activity|GO:0061135,endopeptidase regulator activity|GO:0061134,peptidase regulator activity|GO:0030414,peptidase inhibitor activity|GO:0004867,serine-type endopeptidase inhibitor activity|GO:0004857,enzyme inhibitor activity|GO:0098772,molecular function regulator|GO:0030234,enzyme regulator activity
B3KTX4	0.217186	-2.203	B3KTX4	B3KTX4	GO:0009987,cellular process|GO:0007017,microtubule-based process	GO:0005856,cytoskeleton|GO:0043234,protein complex|GO:0015630,microtubule cytoskeleton|GO:0043228,non-membrane-bounded organelle|GO:0015629,actin cytoskeleton|GO:0043232,intracellular non-membrane-bounded organelle|GO:0044464,cell part|GO:0005623,cell|GO:0043226,organelle|GO:0044446,intracellular organelle part|GO:0043229,intracellular organelle|GO:0044430,cytoskeletal part|GO:0005869,dynactin co…
Q9Y3Z3	0.213602	-2.227	Q9Y3Z3	SAMHD1	GO:0019221,cytokine-mediated signaling pathway|GO:0009217,purine deoxyribonucleoside triphosphate catabolic process|GO:0048583,regulation of response to stimulus|GO:0009166,nucleotide catabolic process|GO:0007165,signal transduction|GO:0007166,cell surface receptor signaling pathway|GO:0031347,regulation of defense response|GO:0046434,organophosphate catabolic process|GO:0044712,single-organism c…	GO:0044446,intracellular organelle part|GO:0043231,intracellular membrane-bounded organelle|GO:0031981,nuclear lumen|GO:0043233,organelle lumen|GO:0005634,nucleus|GO:0016020,membrane|GO:0044464,cell part|GO:0031974,membrane-enclosed lumen|GO:0005622,intracellular|GO:0005654,nucleoplasm|GO:0070013,intracellular organelle lumen|GO:0043229,intracellular organelle|GO:0071944,cell periphery|GO:0044428…	GO:0005488,binding|GO:0016793,triphosphoric monoester hydrolase activity|GO:0042578,phosphoric ester hydrolase activity|GO:0008270,zinc ion binding|GO:0003676,nucleic acid binding|GO:0043167,ion binding|GO:1901363,heterocyclic compound binding|GO:1901265,nucleoside phosphate binding|GO:0043168,anion binding|GO:0043169,cation binding|GO:0046914,transition metal ion binding|GO:0000166,nucleotide bi…	hsa05170,Human immunodeficiency virus 1 infection
O00159	0.200684	-2.317	O00159	MYO1C	GO:0033157,regulation of intracellular protein transport|GO:0008104,protein localization|GO:0032388,positive regulation of intracellular transport|GO:0051049,regulation of transport|GO:0032386,regulation of intracellular transport|GO:0048584,positive regulation of response to stimulus|GO:0048583,regulation of response to stimulus|GO:0061024,membrane organization|GO:0007165,signal transduction|GO:…	GO:0032432,actin filament bundle|GO:0098590,plasma membrane region|GO:0044463,cell projection part|GO:0098796,membrane protein complex|GO:0015629,actin cytoskeleton|GO:0044421,extracellular region part|GO:0060171,stereocilium membrane|GO:0043232,intracellular non-membrane-bounded organelle|GO:0031974,membrane-enclosed lumen|GO:0031975,envelope|GO:0043229,intracellular organelle|GO:0043228,non-mem…	GO:0008022,protein C-terminus binding|GO:0017160,Ral GTPase binding|GO:0035639,purine ribonucleoside triphosphate binding|GO:0019899,enzyme binding|GO:0031267,small GTPase binding|GO:0051020,GTPase binding|GO:0005488,binding|GO:0016887,ATPase activity|GO:0043167,ion binding|GO:1901363,heterocyclic compound binding|GO:0001883,purine nucleoside binding|GO:0001882,nucleoside binding|GO:0043168,anion…	hsa05130,Pathogenic Escherichia coli infection
O43760	0.197647	-2.339	O43760	SYNGR2	GO:0046903,secretion|GO:0009987,cellular process|GO:0016192,vesicle-mediated transport|GO:0044699,single-organism process|GO:0006887,exocytosis|GO:0010256,endomembrane system organization|GO:0044765,single-organism transport|GO:0016043,cellular component organization|GO:0045055,regulated exocytosis|GO:0061024,membrane organization|GO:0032940,secretion by cell|GO:0044802,single-organism membrane o…	GO:0008021,synaptic vesicle|GO:0031594,neuromuscular junction|GO:0043229,intracellular organelle|GO:0045202,synapse|GO:0043227,membrane-bounded organelle|GO:0043226,organelle|GO:0031224,intrinsic component of membrane|GO:0005737,cytoplasm|GO:0070062,extracellular exosome|GO:0016023,cytoplasmic, membrane-bounded vesicle|GO:0031410,cytoplasmic vesicle|GO:0016021,integral component of membrane|GO:00…	GO:0005488,binding|GO:0005515,protein binding
P20073	0.194117	-2.365	P20073	ANXA7	GO:0022604,regulation of cell morphogenesis|GO:0009992,cellular water homeostasis|GO:0009628,response to abiotic stimulus|GO:0009892,negative regulation of metabolic process|GO:0008152,metabolic process|GO:0019222,regulation of metabolic process|GO:0022603,regulation of anatomical structure morphogenesis|GO:0050801,ion homeostasis|GO:0030154,cell differentiation|GO:0007610,behavior|GO:0051128,reg…	GO:0016020,membrane|GO:0005783,endoplasmic reticulum|GO:0044421,extracellular region part|GO:0005789,endoplasmic reticulum membrane|GO:0042175,nuclear outer membrane-endoplasmic reticulum membrane network|GO:0043229,intracellular organelle|GO:0071944,cell periphery|GO:0043227,membrane-bounded organelle|GO:0043226,organelle|GO:0005737,cytoplasm|GO:0030667,secretory granule membrane|GO:0070062,extr…	GO:0048306,calcium-dependent protein binding|GO:0005488,binding|GO:0003676,nucleic acid binding|GO:1901363,heterocyclic compound binding|GO:0043168,anion binding|GO:0043169,cation binding|GO:0005543,phospholipid binding|GO:0005544,calcium-dependent phospholipid binding|GO:0043167,ion binding|GO:0005509,calcium ion binding|GO:0032403,protein complex binding|GO:0046872,metal ion binding|GO:0005178,…
P00915	0.193178	-2.372	P00915	CA1	GO:0044710,single-organism metabolic process|GO:0006810,transport|GO:0044699,single-organism process|GO:0006730,one-carbon metabolic process|GO:0009987,cellular process|GO:0015701,bicarbonate transport|GO:0044237,cellular metabolic process|GO:0015711,organic anion transport|GO:0044765,single-organism transport|GO:0006820,anion transport|GO:0044763,single-organism cellular process|GO:0044281,small…	GO:0005737,cytoplasm|GO:0005622,intracellular|GO:0043230,extracellular organelle|GO:0031982,vesicle|GO:0044421,extracellular region part|GO:0043227,membrane-bounded organelle|GO:0005829,cytosol|GO:0044464,cell part|GO:0005623,cell|GO:0031988,membrane-bounded vesicle|GO:0044444,cytoplasmic part|GO:0005576,extracellular region|GO:0044424,intracellular part|GO:1903561,extracellular vesicle|GO:006501…	GO:0005488,binding|GO:0016787,hydrolase activity|GO:0046872,metal ion binding|GO:0046914,transition metal ion binding|GO:0043169,cation binding|GO:0016835,carbon-oxygen lyase activity|GO:0016836,hydro-lyase activity|GO:0052689,carboxylic ester hydrolase activity|GO:0043167,ion binding|GO:0003824,catalytic activity|GO:0016788,hydrolase activity, acting on ester bonds|GO:0005515,protein binding|GO:…	hsa01100,Metabolic pathways|hsa00910,Nitrogen metabolism		D00218,Acetazolamide (JP16/USP/INN); Diamox (TN)|D00518,Diclofenamide (JP16/INN); Dichlorphenamide (USP); Daranide (TN)|D00652,Brinzolamide (JAN/USP/INN); Azopt (TN)|D00653,Dorzolamide hydrochloride (JP16/USP); Trusopt (TN)|D00655,Methazolamide (JAN/USP/INN); Neptazane (TN)|D01196,Acetazolamide sodium (JAN); Diamox (TN)|D01822,Clofenamide (JAN/INN)|D02441,Ethoxzolamide; Cardrase (TN)|D03845,Sezol…
Q96D15	0.186597	-2.422	Q96D15	RCN3	GO:0008104,protein localization|GO:0080090,regulation of primary metabolic process|GO:0019222,regulation of metabolic process|GO:0060249,anatomical structure homeostasis|GO:0048583,regulation of response to stimulus|GO:0007165,signal transduction|GO:0051896,regulation of protein kinase B signaling|GO:0051716,cellular response to stimulus|GO:0010604,positive regulation of macromolecule metabolic p…	GO:0005737,cytoplasm|GO:0012505,endomembrane system|GO:0005783,endoplasmic reticulum|GO:0044432,endoplasmic reticulum part|GO:0043233,organelle lumen|GO:0044464,cell part|GO:0044444,cytoplasmic part|GO:0031974,membrane-enclosed lumen|GO:0005622,intracellular|GO:0044446,intracellular organelle part|GO:0070013,intracellular organelle lumen|GO:0043229,intracellular organelle|GO:0005788,endoplasmic r…	GO:0043169,cation binding|GO:0043167,ion binding|GO:0005488,binding|GO:0005515,protein binding|GO:0046872,metal ion binding|GO:0005509,calcium ion binding
Q13509	0.183519	-2.446	Q13509	TUBB3	GO:0032502,developmental process|GO:0044707,single-multicellular organism process|GO:0006457,protein folding|GO:0008152,metabolic process|GO:0070271,protein complex biogenesis|GO:0030030,cell projection organization|GO:0030154,cell differentiation|GO:0048468,cell development|GO:1903047,mitotic cell cycle process|GO:0006928,movement of cell or subcellular component|GO:0006458,'de novo' protein fol…	GO:0030425,dendrite|GO:0030424,axon|GO:0043229,intracellular organelle|GO:0043228,non-membrane-bounded organelle|GO:0005874,microtubule|GO:0043226,organelle|GO:0005856,cytoskeleton|GO:0042995,cell projection|GO:0031982,vesicle|GO:0043227,membrane-bounded organelle|GO:0005634,nucleus|GO:0031988,membrane-bounded vesicle|GO:0097458,neuron part|GO:0044430,cytoskeletal part|GO:0043005,neuron projectio…	GO:0005200,structural constituent of cytoskeleton|GO:0035639,purine ribonucleoside triphosphate binding|GO:0005488,binding|GO:0005198,structural molecule activity|GO:1901363,heterocyclic compound binding|GO:1901265,nucleoside phosphate binding|GO:0001882,nucleoside binding|GO:0043168,anion binding|GO:0042277,peptide binding|GO:0016462,pyrophosphatase activity|GO:0000166,nucleotide binding|GO:0032…	hsa05130,Pathogenic Escherichia coli infection|hsa04145,Phagosome|hsa04540,Gap junction		D00491,Paclitaxel (JAN/USP/INN); Abraxane (TN); Taxol (TN)|D00570,Colchicine (JP16/USP); Colchicine (TN)|D01068,Vinblastine sulfate (JP16/USP); Exal (TN); Velban (TN)|D01769,Vindesine sulfate (JAN/USAN); Fildesin (TN)|D01935,Vinorelbine ditartrate (JAN); Vinorelbine tartrate (USP); KW 2307; Navelbine (TN)|D02165,Docetaxel hydrate (JP16); Docetaxel (USAN); Docetaxel injection (JP16); Docetaxel for…
Q96MM6	0.17386	-2.524	Q96MM6	HSPA12B			GO:0035639,purine ribonucleoside triphosphate binding|GO:0005488,binding|GO:0043167,ion binding|GO:1901363,heterocyclic compound binding|GO:1901265,nucleoside phosphate binding|GO:0001882,nucleoside binding|GO:0043168,anion binding|GO:0000166,nucleotide binding|GO:0001883,purine nucleoside binding|GO:0032549,ribonucleoside binding|GO:0017076,purine nucleotide binding|GO:0005524,ATP binding|GO:003…
P16452	0.169929	-2.557	P16452	EPB42	GO:0022604,regulation of cell morphogenesis|GO:0018149,peptide cross-linking|GO:0020027,hemoglobin metabolic process|GO:0022603,regulation of anatomical structure morphogenesis|GO:0050801,ion homeostasis|GO:0030154,cell differentiation|GO:0048468,cell development|GO:0048469,cell maturation|GO:0051128,regulation of cellular component organization|GO:0042592,homeostatic process|GO:0043170,macromole…	GO:0005856,cytoskeleton|GO:0005737,cytoplasm|GO:0043232,intracellular non-membrane-bounded organelle|GO:0030863,cortical cytoskeleton|GO:0044464,cell part|GO:0016020,membrane|GO:0071944,cell periphery|GO:0044444,cytoplasmic part|GO:0005623,cell|GO:0005622,intracellular|GO:0043229,intracellular organelle|GO:0043228,non-membrane-bounded organelle|GO:0005938,cell cortex|GO:0005886,plasma membrane|GO…	GO:0005200,structural constituent of cytoskeleton|GO:0003810,protein-glutamine gamma-glutamyltransferase activity|GO:0005488,binding|GO:0000166,nucleotide binding|GO:1901363,heterocyclic compound binding|GO:1901265,nucleoside phosphate binding|GO:0001882,nucleoside binding|GO:0043168,anion binding|GO:0005198,structural molecule activity|GO:0035639,purine ribonucleoside triphosphate binding|GO:001…
P15144	0.167473	-2.578	P15144	ANPEP	GO:0046718,viral entry into host cell|GO:0052192,movement in environment of other organism involved in symbiotic interaction|GO:0080090,regulation of primary metabolic process|GO:0019222,regulation of metabolic process|GO:0051246,regulation of protein metabolic process|GO:0030154,cell differentiation|GO:0044403,symbiosis, encompassing mutualism through parasitism|GO:0060177,regulation of angioten…	GO:0009897,external side of plasma membrane|GO:0000323,lytic vacuole|GO:0044421,extracellular region part|GO:0043229,intracellular organelle|GO:0071944,cell periphery|GO:0098552,side of membrane|GO:0031988,membrane-bounded vesicle|GO:0043227,membrane-bounded organelle|GO:0043226,organelle|GO:0031224,intrinsic component of membrane|GO:0005737,cytoplasm|GO:0044446,intracellular organelle part|GO:00…	GO:0005488,binding|GO:0004177,aminopeptidase activity|GO:0042277,peptide binding|GO:0046914,transition metal ion binding|GO:0008238,exopeptidase activity|GO:0033218,amide binding|GO:0016787,hydrolase activity|GO:0001618,virus receptor activity|GO:0043169,cation binding|GO:0003824,catalytic activity|GO:0043167,ion binding|GO:0060089,molecular transducer activity|GO:0070011,peptidase activity, acti…	hsa04614,Renin-angiotensin system|hsa01100,Metabolic pathways|hsa00480,Glutathione metabolism|hsa04640,Hematopoietic cell lineage	H00003,Acute myeloid leukemia (AML)	D10026,Tosedostat (USAN/INN)
Q9NZM1	0.165626	-2.594	Q9NZM1	MYOF	GO:0042221,response to chemical|GO:0070887,cellular response to chemical stimulus|GO:0034605,cellular response to heat|GO:0023051,regulation of signaling|GO:0048583,regulation of response to stimulus|GO:0009408,response to heat|GO:0070848,response to growth factor|GO:0006949,syncytium formation|GO:0007009,plasma membrane organization|GO:0003013,circulatory system process|GO:0023052,signaling|GO:0…	GO:0098590,plasma membrane region|GO:0016020,membrane|GO:0044421,extracellular region part|GO:0031975,envelope|GO:0005901,caveola|GO:0043229,intracellular organelle|GO:0071944,cell periphery|GO:0044853,plasma membrane raft|GO:0043227,membrane-bounded organelle|GO:0043226,organelle|GO:0031224,intrinsic component of membrane|GO:0005737,cytoplasm|GO:0070062,extracellular exosome|GO:0016023,cytoplasm…	GO:0043168,anion binding|GO:0005543,phospholipid binding|GO:0008289,lipid binding|GO:0043167,ion binding|GO:0005488,binding|GO:0005515,protein binding
P02549	0.160428	-2.64	P02549	SPTA1	GO:0043933,macromolecular complex subunit organization|GO:0034112,positive regulation of homotypic cell-cell adhesion|GO:0034110,regulation of homotypic cell-cell adhesion|GO:0048468,cell development|GO:0006778,porphyrin-containing compound metabolic process|GO:0006779,porphyrin-containing compound biosynthetic process|GO:0008064,regulation of actin polymerization or depolymerization|GO:0061024,m…	GO:0032437,cuticular plate|GO:0009898,cytoplasmic side of plasma membrane|GO:0043229,intracellular organelle|GO:0043228,non-membrane-bounded organelle|GO:0098552,side of membrane|GO:0005622,intracellular|GO:0031226,intrinsic component of plasma membrane|GO:0043226,organelle|GO:0031224,intrinsic component of membrane|GO:0015629,actin cytoskeleton|GO:0005856,cytoskeleton|GO:0016020,membrane|GO:0044…	GO:0043169,cation binding|GO:0005200,structural constituent of cytoskeleton|GO:0008092,cytoskeletal protein binding|GO:0046982,protein heterodimerization activity|GO:0051015,actin filament binding|GO:0005198,structural molecule activity|GO:0003779,actin binding|GO:0043167,ion binding|GO:0044877,macromolecular complex binding|GO:0005509,calcium ion binding|GO:0005515,protein binding|GO:0032403,pro…	hsa04210,Apoptosis
P30273	0.159541	-2.648	P30273	FCER1G	GO:0002495,antigen processing and presentation of peptide antigen via MHC class II|GO:0006887,exocytosis|GO:0032388,positive regulation of intracellular transport|GO:0051046,regulation of secretion|GO:0051047,positive regulation of secretion|GO:0051049,regulation of transport|GO:0032386,regulation of intracellular transport|GO:0048584,positive regulation of response to stimulus|GO:0048583,regulat…	GO:0043234,protein complex|GO:0009897,external side of plasma membrane|GO:0032997,Fc receptor complex|GO:0016020,membrane|GO:0032991,macromolecular complex|GO:0044459,plasma membrane part|GO:0016021,integral component of membrane|GO:0005886,plasma membrane|GO:0044464,cell part|GO:0032998,Fc-epsilon receptor I complex|GO:0005623,cell|GO:0098797,plasma membrane protein complex|GO:0098796,membrane p…	GO:0038023,signaling receptor activity|GO:0005515,protein binding|GO:0019863,IgE binding|GO:0019763,immunoglobulin receptor activity|GO:0019767,IgE receptor activity|GO:0019865,immunoglobulin binding|GO:0060089,molecular transducer activity|GO:0004888,transmembrane signaling receptor activity|GO:0019864,IgG binding|GO:0004872,receptor activity|GO:0004871,signal transducer activity|GO:0032403,prot…	hsa04611,Platelet activation|hsa04625,C-type lectin receptor signaling pathway|hsa05152,Tuberculosis|hsa05310,Asthma|hsa04071,Sphingolipid signaling pathway|hsa04072,Phospholipase D signaling pathway|hsa04664,Fc epsilon RI signaling pathway|hsa04650,Natural killer cell mediated cytotoxicity
P17661	0.15822	-2.66	P17661	DES	GO:0006928,movement of cell or subcellular component|GO:0003012,muscle system process|GO:0060047,heart contraction|GO:0003015,heart process|GO:0050789,regulation of biological process|GO:0044699,single-organism process|GO:0006936,muscle contraction|GO:0044057,regulation of system process|GO:0009987,cellular process|GO:0016043,cellular component organization|GO:0033275,actin-myosin filament slidin…	GO:0030016,myofibril|GO:0030017,sarcomere|GO:0043229,intracellular organelle|GO:0043228,non-membrane-bounded organelle|GO:0045202,synapse|GO:0044424,intracellular part|GO:0043227,membrane-bounded organelle|GO:0043226,organelle|GO:0030018,Z disc|GO:0005856,cytoskeleton|GO:0045111,intermediate filament cytoskeleton|GO:0070062,extracellular exosome|GO:0016020,membrane|GO:0031674,I band|GO:0031988,me…	GO:0005200,structural constituent of cytoskeleton|GO:0008092,cytoskeletal protein binding|GO:0005198,structural molecule activity|GO:0005488,binding|GO:0005515,protein binding|GO:0042802,identical protein binding	hsa05410,Hypertrophic cardiomyopathy|hsa05412,Arrhythmogenic right ventricular cardiomyopathy|hsa05414,Dilated cardiomyopathy
D9ZGG2	0.155825	-2.682	D9ZGG2	VTN	GO:0022607,cellular component assembly|GO:0070271,protein complex biogenesis|GO:0043933,macromolecular complex subunit organization|GO:0030155,regulation of cell adhesion|GO:0030154,cell differentiation|GO:0007160,cell-matrix adhesion|GO:0001889,liver development|GO:0010001,glial cell differentiation|GO:0034622,cellular macromolecular complex assembly|GO:0050789,regulation of biological process|G…	GO:0005783,endoplasmic reticulum|GO:0005788,endoplasmic reticulum lumen|GO:0031974,membrane-enclosed lumen|GO:0031012,extracellular matrix|GO:0043229,intracellular organelle|GO:0043227,membrane-bounded organelle|GO:0043226,organelle|GO:0005737,cytoplasm|GO:0005615,extracellular space|GO:0044421,extracellular region part|GO:0044432,endoplasmic reticulum part|GO:0044431,Golgi apparatus part|GO:0005…	GO:1901681,sulfur compound binding|GO:0043168,anion binding|GO:0038024,cargo receptor activity|GO:0050840,extracellular matrix binding|GO:0097367,carbohydrate derivative binding|GO:0005044,scavenger receptor activity|GO:0030247,polysaccharide binding|GO:0030246,carbohydrate binding|GO:0043167,ion binding|GO:0005539,glycosaminoglycan binding|GO:0060089,molecular transducer activity|GO:0001871,patt…
P05186	0.148754	-2.749	P05186	ALPL	GO:0048705,skeletal system morphogenesis|GO:0009991,response to extracellular stimulus|GO:0048856,anatomical structure development|GO:0034505,tooth mineralization|GO:0016311,dephosphorylation|GO:0030154,cell differentiation|GO:0060349,bone morphogenesis|GO:0060348,bone development|GO:0001501,skeletal system development|GO:0014070,response to organic cyclic compound|GO:0001503,ossification|GO:0046…	GO:0031012,extracellular matrix|GO:0071944,cell periphery|GO:0043227,membrane-bounded organelle|GO:0043226,organelle|GO:0031224,intrinsic component of membrane|GO:0031225,anchored component of membrane|GO:0070062,extracellular exosome|GO:0016021,integral component of membrane|GO:0016020,membrane|GO:0031988,membrane-bounded vesicle|GO:0031982,vesicle|GO:0005886,plasma membrane|GO:1903561,extracell…	GO:0016787,hydrolase activity|GO:0016818,hydrolase activity, acting on acid anhydrides, in phosphorus-containing anhydrides|GO:0016791,phosphatase activity|GO:0004035,alkaline phosphatase activity|GO:0003824,catalytic activity|GO:0016817,hydrolase activity, acting on acid anhydrides|GO:0016788,hydrolase activity, acting on ester bonds|GO:0043167,ion binding|GO:0042578,phosphoric ester hydrolase a…	hsa00730,Thiamine metabolism|hsa00790,Folate biosynthesis|hsa01100,Metabolic pathways
P01023	0.141807	-2.818	P01023	A2M	GO:0007599,hemostasis|GO:0080090,regulation of primary metabolic process|GO:0019222,regulation of metabolic process|GO:0048585,negative regulation of response to stimulus|GO:0048584,positive regulation of response to stimulus|GO:0048583,regulation of response to stimulus|GO:0031348,negative regulation of defense response|GO:0007165,signal transduction|GO:0031347,regulation of defense response|GO:…	GO:0031974,membrane-enclosed lumen|GO:0043229,intracellular organelle|GO:0060205,cytoplasmic membrane-bounded vesicle lumen|GO:0043227,membrane-bounded organelle|GO:0043226,organelle|GO:0005737,cytoplasm|GO:0031983,vesicle lumen|GO:0070062,extracellular exosome|GO:0031093,platelet alpha granule lumen|GO:0016023,cytoplasmic, membrane-bounded vesicle|GO:0031410,cytoplasmic vesicle|GO:0072562,blood …	GO:0030414,peptidase inhibitor activity|GO:0019958,C-X-C chemokine binding|GO:0048306,calcium-dependent protein binding|GO:0019956,chemokine binding|GO:0019955,cytokine binding|GO:0019899,enzyme binding|GO:0005488,binding|GO:0004857,enzyme inhibitor activity|GO:0098772,molecular function regulator|GO:0019959,interleukin-8 binding|GO:0019838,growth factor binding|GO:0002020,protease binding|GO:004…	hsa04610,Complement and coagulation cascades
Q7L7L0	0.137643	-2.861	Q7L7L0	HIST3H2A	GO:0034728,nucleosome organization|GO:0051716,cellular response to stimulus|GO:0071482,cellular response to light stimulus|GO:0043933,macromolecular complex subunit organization|GO:0009314,response to radiation|GO:0090304,nucleic acid metabolic process|GO:0034641,cellular nitrogen compound metabolic process|GO:0070914,UV-damage excision repair|GO:0009416,response to light stimulus|GO:0034644,cell…	GO:0031974,membrane-enclosed lumen|GO:0044815,DNA packaging complex|GO:0043229,intracellular organelle|GO:0043228,non-membrane-bounded organelle|GO:0000785,chromatin|GO:0000786,nucleosome|GO:0000788,nuclear nucleosome|GO:0000228,nuclear chromosome|GO:0043227,membrane-bounded organelle|GO:0043226,organelle|GO:0070062,extracellular exosome|GO:0031981,nuclear lumen|GO:0005634,nucleus|GO:0031988,memb…	GO:0003676,nucleic acid binding|GO:0097159,organic cyclic compound binding|GO:0005488,binding|GO:0005515,protein binding|GO:0003677,DNA binding|GO:0046983,protein dimerization activity|GO:0046982,protein heterodimerization activity|GO:1901363,heterocyclic compound binding	hsa05322,Systemic lupus erythematosus|hsa05034,Alcoholism|hsa04217,Necroptosis
O14558	0.137357	-2.864	O14558	HSPB6	GO:0044707,single-multicellular organism process|GO:0044057,regulation of system process|GO:0006936,muscle contraction|GO:0006937,regulation of muscle contraction|GO:0003012,muscle system process|GO:0032501,multicellular organismal process|GO:0065007,biological regulation|GO:0090257,regulation of muscle system process|GO:0051239,regulation of multicellular organismal process|GO:0050789,regulation…	GO:0005737,cytoplasm|GO:0043231,intracellular membrane-bounded organelle|GO:0005634,nucleus|GO:0044464,cell part|GO:0005623,cell|GO:0005622,intracellular|GO:0043229,intracellular organelle|GO:0044424,intracellular part|GO:0043227,membrane-bounded organelle|GO:0043226,organelle|GO:0005576,extracellular region|GO:0031974,membrane-enclosed lumen|GO:0043228,non-membrane-bounded organelle|GO:0031981,n…	GO:0005212,structural constituent of eye lens|GO:0005198,structural molecule activity|GO:0005488,binding|GO:0005515,protein binding|GO:0046983,protein dimerization activity|GO:0042802,identical protein binding|GO:0042803,protein homodimerization activity|GO:0051087,chaperone binding|GO:0051082,unfolded protein binding
P02675	0.135372	-2.885	P02675	FGB	GO:2001234,negative regulation of apoptotic signaling pathway|GO:0034116,positive regulation of heterotypic cell-cell adhesion|GO:2001236,regulation of extrinsic apoptotic signaling pathway|GO:2001237,negative regulation of extrinsic apoptotic signaling pathway|GO:0019220,regulation of phosphate metabolic process|GO:0080090,regulation of primary metabolic process|GO:0019222,regulation of metaboli…	GO:0009897,external side of plasma membrane|GO:0098552,side of membrane|GO:0031974,membrane-enclosed lumen|GO:0043229,intracellular organelle|GO:0071944,cell periphery|GO:0060205,cytoplasmic membrane-bounded vesicle lumen|GO:0043227,membrane-bounded organelle|GO:0043226,organelle|GO:0005737,cytoplasm|GO:0031983,vesicle lumen|GO:0070062,extracellular exosome|GO:0031093,platelet alpha granule lumen…	GO:0030674,protein binding, bridging|GO:0051087,chaperone binding|GO:0005198,structural molecule activity|GO:0005488,binding|GO:0005515,protein binding|GO:0005102,receptor binding|GO:0050839,cell adhesion molecule binding|GO:0060090,binding, bridging|GO:0005201,extracellular matrix structural constituent	hsa04611,Platelet activation|hsa04610,Complement and coagulation cascades
P08294	0.129677	-2.947	P08294	SOD3	GO:0010038,response to metal ion|GO:0000305,response to oxygen radical|GO:1990267,response to transition metal nanoparticle|GO:0000303,response to superoxide|GO:0000302,response to reactive oxygen species|GO:0006801,superoxide metabolic process|GO:0070887,cellular response to chemical stimulus|GO:0001666,response to hypoxia|GO:0044699,single-organism process|GO:0044710,single-organism metabolic p…	GO:0031974,membrane-enclosed lumen|GO:0031012,extracellular matrix|GO:0043229,intracellular organelle|GO:0043227,membrane-bounded organelle|GO:0043226,organelle|GO:0005737,cytoplasm|GO:0031984,organelle subcompartment|GO:0070062,extracellular exosome|GO:0005615,extracellular space|GO:0005634,nucleus|GO:0031988,membrane-bounded vesicle|GO:0044431,Golgi apparatus part|GO:0005794,Golgi apparatus|GO:…	GO:1901681,sulfur compound binding|GO:0016721,oxidoreductase activity, acting on superoxide radicals as acceptor|GO:0046872,metal ion binding|GO:0005488,binding|GO:0046914,transition metal ion binding|GO:0043169,cation binding|GO:0097367,carbohydrate derivative binding|GO:0016209,antioxidant activity|GO:0043167,ion binding|GO:0043168,anion binding|GO:0005539,glycosaminoglycan binding|GO:0003824,c…
Q687X5	0.124913	-3.001	Q687X5	STEAP4	GO:0050801,ion homeostasis|GO:0030154,cell differentiation|GO:0042592,homeostatic process|GO:0055072,iron ion homeostasis|GO:0006826,iron ion transport|GO:0006825,copper ion transport|GO:0098771,inorganic ion homeostasis|GO:0045444,fat cell differentiation|GO:0044699,single-organism process|GO:0044710,single-organism metabolic process|GO:0048869,cellular developmental process|GO:0099587,inorganic…	GO:0043229,intracellular organelle|GO:0071944,cell periphery|GO:0005622,intracellular|GO:0031226,intrinsic component of plasma membrane|GO:0043226,organelle|GO:0031224,intrinsic component of membrane|GO:0005737,cytoplasm|GO:0031982,vesicle|GO:0043227,membrane-bounded organelle|GO:0016021,integral component of membrane|GO:0016020,membrane|GO:0070062,extracellular exosome|GO:0031988,membrane-bounde…	GO:0043169,cation binding|GO:0016722,oxidoreductase activity, oxidizing metal ions|GO:0016723,oxidoreductase activity, oxidizing metal ions, NAD or NADP as acceptor|GO:0046872,metal ion binding|GO:0043167,ion binding|GO:0052851,ferric-chelate reductase (NADPH) activity|GO:0003824,catalytic activity|GO:0005488,binding|GO:0008823,cupric reductase activity|GO:0016491,oxidoreductase activity|GO:19013…
Q5U0D2	0.121329	-3.043	Q5U0D2	TAGLN			GO:0008092,cytoskeletal protein binding|GO:0051015,actin filament binding|GO:0003779,actin binding|GO:0044877,macromolecular complex binding|GO:0005488,binding|GO:0005515,protein binding|GO:0032403,protein complex binding
P31949	0.120993	-3.047	P31949	S100A11	GO:0044238,primary metabolic process|GO:0009892,negative regulation of metabolic process|GO:0080090,regulation of primary metabolic process|GO:0009890,negative regulation of biosynthetic process|GO:0031327,negative regulation of cellular biosynthetic process|GO:0031326,regulation of cellular biosynthetic process|GO:0031324,negative regulation of cellular metabolic process|GO:0031323,regulation of…	GO:0031974,membrane-enclosed lumen|GO:0043229,intracellular organelle|GO:0043227,membrane-bounded organelle|GO:0043226,organelle|GO:0005737,cytoplasm|GO:0001726,ruffle|GO:1903561,extracellular vesicle|GO:0070062,extracellular exosome|GO:0031981,nuclear lumen|GO:0005615,extracellular space|GO:0005634,nucleus|GO:0031988,membrane-bounded vesicle|GO:0005654,nucleoplasm|GO:0031252,cell leading edge|GO…	GO:0005488,binding|GO:0043169,cation binding|GO:0044548,S100 protein binding|GO:0048306,calcium-dependent protein binding|GO:0043167,ion binding|GO:0005509,calcium ion binding|GO:0005515,protein binding|GO:0046983,protein dimerization activity|GO:0046872,metal ion binding|GO:0042802,identical protein binding|GO:0042803,protein homodimerization activity|GO:0050839,cell adhesion molecule binding|GO…
P04839	0.117848	-3.085	P04839	CYBB	GO:0006954,inflammatory response|GO:0051234,establishment of localization|GO:0042554,superoxide anion generation|GO:0006950,response to stress|GO:0051049,regulation of transport|GO:0007167,enzyme linked receptor protein signaling pathway|GO:0044249,cellular biosynthetic process|GO:0042590,antigen processing and presentation of exogenous peptide antigen via MHC class I|GO:0023052,signaling|GO:0007…	GO:0005887,integral component of plasma membrane|GO:1990204,oxidoreductase complex|GO:0030139,endocytic vesicle|GO:0043229,intracellular organelle|GO:0071944,cell periphery|GO:0043227,membrane-bounded organelle|GO:0043226,organelle|GO:0031224,intrinsic component of membrane|GO:0005737,cytoplasm|GO:0098797,plasma membrane protein complex|GO:0030666,endocytic vesicle membrane|GO:0031982,vesicle|GO:…	GO:0016175,superoxide-generating NADPH oxidase activity|GO:0005488,binding|GO:0043167,ion binding|GO:1901363,heterocyclic compound binding|GO:1901265,nucleoside phosphate binding|GO:0016491,oxidoreductase activity|GO:0043168,anion binding|GO:0043169,cation binding|GO:0050660,flavin adenine dinucleotide binding|GO:0050664,oxidoreductase activity, acting on NAD(P)H, oxygen as acceptor|GO:0046982,pr…	hsa04621,NOD-like receptor signaling pathway|hsa05140,Leishmaniasis|hsa04670,Leukocyte transendothelial migration|hsa04145,Phagosome|hsa04066,HIF-1 signaling pathway|hsa04933,AGE-RAGE signaling pathway in diabetic complications|hsa04217,Necroptosis|hsa04216,Ferroptosis
P02679	0.115503	-3.114	P02679	FGG	GO:2001234,negative regulation of apoptotic signaling pathway|GO:0034116,positive regulation of heterotypic cell-cell adhesion|GO:2001236,regulation of extrinsic apoptotic signaling pathway|GO:2001237,negative regulation of extrinsic apoptotic signaling pathway|GO:0019220,regulation of phosphate metabolic process|GO:0080090,regulation of primary metabolic process|GO:0019222,regulation of metaboli…	GO:0009897,external side of plasma membrane|GO:0098552,side of membrane|GO:0031974,membrane-enclosed lumen|GO:0043229,intracellular organelle|GO:0071944,cell periphery|GO:0060205,cytoplasmic membrane-bounded vesicle lumen|GO:0043227,membrane-bounded organelle|GO:0043226,organelle|GO:0005737,cytoplasm|GO:0031983,vesicle lumen|GO:0070062,extracellular exosome|GO:0031093,platelet alpha granule lumen…	GO:0043169,cation binding|GO:0030674,protein binding, bridging|GO:0050839,cell adhesion molecule binding|GO:0005198,structural molecule activity|GO:0043167,ion binding|GO:0005488,binding|GO:0005515,protein binding|GO:0005102,receptor binding|GO:0046872,metal ion binding|GO:0060090,binding, bridging|GO:0042803,protein homodimerization activity|GO:0046983,protein dimerization activity|GO:0042802,id…	hsa04611,Platelet activation|hsa04610,Complement and coagulation cascades|hsa05150,Staphylococcus aureus infection
P21980	0.114944	-3.121	P21980	TGM2	GO:0006909,phagocytosis|GO:0007165,signal transduction|GO:0098771,inorganic ion homeostasis|GO:0051561,positive regulation of mitochondrial calcium ion concentration|GO:0051560,mitochondrial calcium ion homeostasis|GO:0051716,cellular response to stimulus|GO:0045785,positive regulation of cell adhesion|GO:0048513,animal organ development|GO:0048518,positive regulation of biological process|GO:005…	GO:0005783,endoplasmic reticulum|GO:0043229,intracellular organelle|GO:0071944,cell periphery|GO:0005924,cell-substrate adherens junction|GO:0005925,focal adhesion|GO:0043227,membrane-bounded organelle|GO:0043226,organelle|GO:0031224,intrinsic component of membrane|GO:0030055,cell-substrate junction|GO:0005737,cytoplasm|GO:0031982,vesicle|GO:0031226,intrinsic component of plasma membrane|GO:00160…	GO:0043169,cation binding|GO:0003810,protein-glutamine gamma-glutamyltransferase activity|GO:0043167,ion binding|GO:0003824,catalytic activity|GO:0016740,transferase activity|GO:0016746,transferase activity, transferring acyl groups|GO:0005488,binding|GO:0005515,protein binding|GO:0016755,transferase activity, transferring amino-acyl groups|GO:0046872,metal ion binding|GO:1901363,heterocyclic com…	hsa05016,Huntington disease
P04114	0.113204	-3.143	P04114	APOB	GO:0044238,primary metabolic process|GO:0007599,hemostasis|GO:0080090,regulation of primary metabolic process|GO:0019222,regulation of metabolic process|GO:0007596,blood coagulation|GO:0032870,cellular response to hormone stimulus|GO:0034645,cellular macromolecule biosynthetic process|GO:0072359,circulatory system development|GO:0072358,cardiovascular system development|GO:0007165,signal transduc…	GO:0097458,neuron part|GO:0034359,mature chylomicron|GO:0005783,endoplasmic reticulum|GO:0034361,very-low-density lipoprotein particle|GO:0015629,actin cytoskeleton|GO:0042627,chylomicron|GO:0005788,endoplasmic reticulum lumen|GO:0005789,endoplasmic reticulum membrane|GO:0030139,endocytic vesicle|GO:0042175,nuclear outer membrane-endoplasmic reticulum membrane network|GO:0043229,intracellular org…	GO:0005319,lipid transporter activity|GO:1901681,sulfur compound binding|GO:0005102,receptor binding|GO:0022892,substrate-specific transporter activity|GO:0035473,lipase binding|GO:0097367,carbohydrate derivative binding|GO:0005215,transporter activity|GO:0005543,phospholipid binding|GO:0008289,lipid binding|GO:0017127,cholesterol transporter activity|GO:0043168,anion binding|GO:0005539,glycosami…	hsa04979,Cholesterol metabolism|hsa04975,Fat digestion and absorption|hsa04977,Vitamin digestion and absorption		D08946,Mipomersen sodium (USAN); Kynamro (TN)
Q9NXG2	0.106579	-3.23	Q9NXG2	THUMPD1	GO:0009451,RNA modification|GO:0090304,nucleic acid metabolic process|GO:0034641,cellular nitrogen compound metabolic process|GO:0006807,nitrogen compound metabolic process|GO:0034660,ncRNA metabolic process|GO:0071840,cellular component organization or biogenesis|GO:0034470,ncRNA processing|GO:0006139,nucleobase-containing compound metabolic process|GO:0044260,cellular macromolecule metabolic pr…	GO:0044446,intracellular organelle part|GO:0043231,intracellular membrane-bounded organelle|GO:0031981,nuclear lumen|GO:0043233,organelle lumen|GO:0005634,nucleus|GO:0044464,cell part|GO:0031974,membrane-enclosed lumen|GO:0005622,intracellular|GO:0005654,nucleoplasm|GO:0070013,intracellular organelle lumen|GO:0043229,intracellular organelle|GO:0044428,nuclear part|GO:0005623,cell|GO:0044424,intra…	GO:0097159,organic cyclic compound binding|GO:0044822,poly(A) RNA binding|GO:0005488,binding|GO:0003676,nucleic acid binding|GO:1901363,heterocyclic compound binding|GO:0003723,RNA binding|GO:0005515,protein binding
P22105	0.104821	-3.254	P22105	TNXB	GO:0019220,regulation of phosphate metabolic process|GO:0080090,regulation of primary metabolic process|GO:0019222,regulation of metabolic process|GO:0048583,regulation of response to stimulus|GO:0007160,cell-matrix adhesion|GO:0007165,signal transduction|GO:0023014,signal transduction by protein phosphorylation|GO:0044710,single-organism metabolic process|GO:0043206,extracellular fibril organiza…	GO:0031012,extracellular matrix|GO:0043227,membrane-bounded organelle|GO:0043226,organelle|GO:0070062,extracellular exosome|GO:0005583,fibrillar collagen trimer|GO:0031988,membrane-bounded vesicle|GO:0098644,complex of collagen trimers|GO:0098643,banded collagen fibril|GO:0031982,vesicle|GO:0032991,macromolecular complex|GO:1903561,extracellular vesicle|GO:0005615,extracellular space|GO:0043234,p…	GO:1901681,sulfur compound binding|GO:0005178,integrin binding|GO:0050839,cell adhesion molecule binding|GO:0097367,carbohydrate derivative binding|GO:0043168,anion binding|GO:0005539,glycosaminoglycan binding|GO:0043167,ion binding|GO:0044877,macromolecular complex binding|GO:0005488,binding|GO:0005515,protein binding|GO:0032403,protein complex binding|GO:0005102,receptor binding|GO:0005518,coll…	hsa05165,Human papillomavirus infection|hsa05206,MicroRNAs in cancer|hsa04512,ECM-receptor interaction|hsa04510,Focal adhesion|hsa04151,PI3K-Akt signaling pathway
P35555	0.104676	-3.256	P35555	FBN1	GO:0044238,primary metabolic process|GO:0080090,regulation of primary metabolic process|GO:0019222,regulation of metabolic process|GO:0048585,negative regulation of response to stimulus|GO:0048583,regulation of response to stimulus|GO:0030509,BMP signaling pathway|GO:0072359,circulatory system development|GO:0072358,cardiovascular system development|GO:0007165,signal transduction|GO:0007166,cell …	GO:0005604,basement membrane|GO:0043205,fibril|GO:0070062,extracellular exosome|GO:0044421,extracellular region part|GO:0065010,extracellular membrane-bounded organelle|GO:0031988,membrane-bounded vesicle|GO:0031012,extracellular matrix|GO:0043226,organelle|GO:0043230,extracellular organelle|GO:0043227,membrane-bounded organelle|GO:0005576,extracellular region|GO:0005615,extracellular space|GO:00…	GO:0005178,integrin binding|GO:0005201,extracellular matrix structural constituent|GO:0050839,cell adhesion molecule binding|GO:0043169,cation binding|GO:0030023,extracellular matrix constituent conferring elasticity|GO:0005198,structural molecule activity|GO:0043167,ion binding|GO:0044877,macromolecular complex binding|GO:0005509,calcium ion binding|GO:0005515,protein binding|GO:0032403,protein …	hsa04350,TGF-beta signaling pathway
P00325	0.101532	-3.3	P00325	ADH1B	GO:0071704,organic substance metabolic process|GO:0044710,single-organism metabolic process|GO:0008152,metabolic process|GO:0006805,xenobiotic metabolic process|GO:0044699,single-organism process|GO:0009410,response to xenobiotic stimulus|GO:0009987,cellular process|GO:0051716,cellular response to stimulus|GO:0044237,cellular metabolic process|GO:0006066,alcohol metabolic process|GO:0006067,ethan…	GO:0005737,cytoplasm|GO:0005829,cytosol|GO:0044464,cell part|GO:0005623,cell|GO:0005622,intracellular|GO:0044444,cytoplasmic part|GO:0044424,intracellular part|GO:0031974,membrane-enclosed lumen|GO:0043229,intracellular organelle|GO:0071944,cell periphery|GO:0043227,membrane-bounded organelle|GO:0043226,organelle|GO:0031981,nuclear lumen|GO:0005634,nucleus|GO:0016020,membrane|GO:0005654,nucleopla…	GO:0005488,binding|GO:0043169,cation binding|GO:0016614,oxidoreductase activity, acting on CH-OH group of donors|GO:0046914,transition metal ion binding|GO:0016616,oxidoreductase activity, acting on the CH-OH group of donors, NAD or NADP as acceptor|GO:0004024,alcohol dehydrogenase activity, zinc-dependent|GO:0004022,alcohol dehydrogenase (NAD) activity|GO:0043167,ion binding|GO:0003824,catalytic…	hsa00980,Metabolism of xenobiotics by cytochrome P450|hsa00982,Drug metabolism - cytochrome P450|hsa00830,Retinol metabolism|hsa01100,Metabolic pathways|hsa00071,Fatty acid degradation|hsa05204,Chemical carcinogenesis|hsa00010,Glycolysis / Gluconeogenesis|hsa00350,Tyrosine metabolism		D00707,Fomepizole (JAN/USAN/INN); Antizol (TN)
P51911	0.100551	-3.314	P51911	CNN1	GO:0031032,actomyosin structure organization|GO:0030036,actin cytoskeleton organization|GO:0006940,regulation of smooth muscle contraction|GO:0003012,muscle system process|GO:0050789,regulation of biological process|GO:0071840,cellular component organization or biogenesis|GO:0030029,actin filament-based process|GO:0044057,regulation of system process|GO:0016043,cellular component organization|GO:…	GO:0005856,cytoskeleton|GO:0043232,intracellular non-membrane-bounded organelle|GO:0070161,anchoring junction|GO:0044464,cell part|GO:0005623,cell|GO:0005622,intracellular|GO:0043229,intracellular organelle|GO:0043228,non-membrane-bounded organelle|GO:0005912,adherens junction|GO:0044424,intracellular part|GO:0005924,cell-substrate adherens junction|GO:0005925,focal adhesion|GO:0043226,organelle|…	GO:0008092,cytoskeletal protein binding|GO:0003779,actin binding|GO:0005488,binding|GO:0005515,protein binding|GO:0005516,calmodulin binding
Q04941	0.0897465	-3.478	Q04941	PLP2	GO:0019221,cytokine-mediated signaling pathway|GO:0023052,signaling|GO:0007165,signal transduction|GO:0007166,cell surface receptor signaling pathway|GO:0042221,response to chemical|GO:0070887,cellular response to chemical stimulus|GO:0050789,regulation of biological process|GO:0044699,single-organism process|GO:0034097,response to cytokine|GO:0051716,cellular response to stimulus|GO:0042330,taxi…	GO:0005783,endoplasmic reticulum|GO:0005789,endoplasmic reticulum membrane|GO:0042175,nuclear outer membrane-endoplasmic reticulum membrane network|GO:0043229,intracellular organelle|GO:0071944,cell periphery|GO:0043227,membrane-bounded organelle|GO:0043226,organelle|GO:0031224,intrinsic component of membrane|GO:0005737,cytoplasm|GO:0031982,vesicle|GO:0016021,integral component of membrane|GO:001…	GO:0022891,substrate-specific transmembrane transporter activity|GO:0022892,substrate-specific transporter activity|GO:0019956,chemokine binding|GO:0005215,transporter activity|GO:0019955,cytokine binding|GO:0015075,ion transmembrane transporter activity|GO:0022857,transmembrane transporter activity|GO:0005488,binding|GO:0005515,protein binding
Q16647	0.0865693	-3.53	Q16647	PTGIS	GO:0080090,regulation of primary metabolic process|GO:0019222,regulation of metabolic process|GO:0048585,negative regulation of response to stimulus|GO:0048584,positive regulation of response to stimulus|GO:0048583,regulation of response to stimulus|GO:0045765,regulation of angiogenesis|GO:0031348,negative regulation of defense response|GO:0072359,circulatory system development|GO:0044710,single-…	GO:0098590,plasma membrane region|GO:0005783,endoplasmic reticulum|GO:0044421,extracellular region part|GO:0005789,endoplasmic reticulum membrane|GO:0005901,caveola|GO:0043229,intracellular organelle|GO:0071944,cell periphery|GO:0044853,plasma membrane raft|GO:0043227,membrane-bounded organelle|GO:0043226,organelle|GO:0031224,intrinsic component of membrane|GO:0005737,cytoplasm|GO:0031090,organel…	GO:0043169,cation binding|GO:0004497,monooxygenase activity|GO:0046872,metal ion binding|GO:0016853,isomerase activity|GO:0008116,prostaglandin-I synthase activity|GO:0046906,tetrapyrrole binding|GO:0097159,organic cyclic compound binding|GO:0016705,oxidoreductase activity, acting on paired donors, with incorporation or reduction of molecular oxygen|GO:0046914,transition metal ion binding|GO:0020…	hsa00590,Arachidonic acid metabolism|hsa01100,Metabolic pathways
P02792	0.0860906	-3.538	P02792	FTL	GO:0050801,ion homeostasis|GO:0051649,establishment of localization in cell|GO:0042592,homeostatic process|GO:0098771,inorganic ion homeostasis|GO:0055072,iron ion homeostasis|GO:0006826,iron ion transport|GO:0055076,transition metal ion homeostasis|GO:0030001,metal ion transport|GO:0044699,single-organism process|GO:0046916,cellular transition metal ion homeostasis|GO:0000041,transition metal io…	GO:0008043,intracellular ferritin complex|GO:0043227,membrane-bounded organelle|GO:0043226,organelle|GO:0005737,cytoplasm|GO:0070288,ferritin complex|GO:0031982,vesicle|GO:0016020,membrane|GO:0031988,membrane-bounded vesicle|GO:0032991,macromolecular complex|GO:1903561,extracellular vesicle|GO:0070062,extracellular exosome|GO:0043234,protein complex|GO:0043230,extracellular organelle|GO:0005829,c…	GO:0043169,cation binding|GO:0046914,transition metal ion binding|GO:0043167,ion binding|GO:0008199,ferric iron binding|GO:0005488,binding|GO:0005515,protein binding|GO:0005506,iron ion binding|GO:0046872,metal ion binding|GO:0042802,identical protein binding|GO:0016722,oxidoreductase activity, oxidizing metal ions|GO:0016724,oxidoreductase activity, oxidizing metal ions, oxygen as acceptor|GO:00…	hsa04978,Mineral absorption|hsa04217,Necroptosis|hsa04216,Ferroptosis	H00043,Neuroblastoma
Q9UMS6	0.084553	-3.564	Q9UMS6	SYNPO2	GO:0044238,primary metabolic process|GO:0019220,regulation of phosphate metabolic process|GO:0080090,regulation of primary metabolic process|GO:0019222,regulation of metabolic process|GO:0071840,cellular component organization or biogenesis|GO:0032231,regulation of actin filament bundle assembly|GO:0032233,positive regulation of actin filament bundle assembly|GO:0051495,positive regulation of cyt…	GO:0015629,actin cytoskeleton|GO:0030016,myofibril|GO:0030017,sarcomere|GO:0043229,intracellular organelle|GO:0043228,non-membrane-bounded organelle|GO:0005924,cell-substrate adherens junction|GO:0005925,focal adhesion|GO:0043227,membrane-bounded organelle|GO:0043226,organelle|GO:0030054,cell junction|GO:0030055,cell-substrate junction|GO:0005856,cytoskeleton|GO:0005634,nucleus|GO:0031674,I band|…	GO:0051393,alpha-actinin binding|GO:0008092,cytoskeletal protein binding|GO:0051371,muscle alpha-actinin binding|GO:0003779,actin binding|GO:0071889,14-3-3 protein binding|GO:0005488,binding|GO:0005515,protein binding|GO:0042805,actinin binding|GO:0031005,filamin binding|GO:0030674,protein binding, bridging|GO:0060090,binding, bridging
Q14767	0.0816728	-3.614	Q14767	LTBP2	GO:0042221,response to chemical|GO:0008104,protein localization|GO:0070887,cellular response to chemical stimulus|GO:0032940,secretion by cell|GO:0023052,signaling|GO:0007165,signal transduction|GO:0007166,cell surface receptor signaling pathway|GO:0007167,enzyme linked receptor protein signaling pathway|GO:0050789,regulation of biological process|GO:0044699,single-organism process|GO:0009719,res…	GO:0005622,intracellular|GO:0043230,extracellular organelle|GO:0070062,extracellular exosome|GO:0044421,extracellular region part|GO:0043227,membrane-bounded organelle|GO:0044464,cell part|GO:0005623,cell|GO:0031012,extracellular matrix|GO:0043226,organelle|GO:0005576,extracellular region|GO:0005615,extracellular space|GO:0031988,membrane-bounded vesicle|GO:1903561,extracellular vesicle|GO:006501…	GO:1901681,sulfur compound binding|GO:0043168,anion binding|GO:0043169,cation binding|GO:0097367,carbohydrate derivative binding|GO:0019838,growth factor binding|GO:0043167,ion binding|GO:0005539,glycosaminoglycan binding|GO:0005509,calcium ion binding|GO:0005515,protein binding|GO:0046872,metal ion binding|GO:0008201,heparin binding|GO:0005488,binding|GO:0005201,extracellular matrix structural c…
P02655	0.0741197	-3.754	P02655	APOC2	GO:0009628,response to abiotic stimulus|GO:0019220,regulation of phosphate metabolic process|GO:0080090,regulation of primary metabolic process|GO:0034447,very-low-density lipoprotein particle clearance|GO:0051049,regulation of transport|GO:0006820,anion transport|GO:0007165,signal transduction|GO:0044283,small molecule biosynthetic process|GO:0048261,negative regulation of receptor-mediated endo…	GO:0034358,plasma lipoprotein particle|GO:0044421,extracellular region part|GO:0043229,intracellular organelle|GO:1990777,lipoprotein particle|GO:0005622,intracellular|GO:0043227,membrane-bounded organelle|GO:0043226,organelle|GO:0005737,cytoplasm|GO:0042627,chylomicron|GO:0031982,vesicle|GO:0005615,extracellular space|GO:0031988,membrane-bounded vesicle|GO:0034361,very-low-density lipoprotein pa…	GO:0005488,binding|GO:0098772,molecular function regulator|GO:0046983,protein dimerization activity|GO:0030234,enzyme regulator activity|GO:0060230,lipoprotein lipase activator activity|GO:0008289,lipid binding|GO:0019899,enzyme binding|GO:0042803,protein homodimerization activity|GO:0043274,phospholipase binding|GO:0008047,enzyme activator activity|GO:0005515,protein binding|GO:0004857,enzyme in…	hsa04979,Cholesterol metabolism
P08123	0.0735567	-3.765	P08123	COL1A2	GO:0007599,hemostasis|GO:0007596,blood coagulation|GO:0001501,skeletal system development|GO:0072359,circulatory system development|GO:0072358,cardiovascular system development|GO:0007165,signal transduction|GO:0007166,cell surface receptor signaling pathway|GO:0007167,enzyme linked receptor protein signaling pathway|GO:0071840,cellular component organization or biogenesis|GO:0044712,single-organ…	GO:0005783,endoplasmic reticulum|GO:0044421,extracellular region part|GO:0031974,membrane-enclosed lumen|GO:0031012,extracellular matrix|GO:0043229,intracellular organelle|GO:0043227,membrane-bounded organelle|GO:0043226,organelle|GO:0005584,collagen type I trimer|GO:0070062,extracellular exosome|GO:0005583,fibrillar collagen trimer|GO:0005615,extracellular space|GO:0031988,membrane-bounded vesic…	GO:0043169,cation binding|GO:0005201,extracellular matrix structural constituent|GO:0005198,structural molecule activity|GO:0030674,protein binding, bridging|GO:0043167,ion binding|GO:0046332,SMAD binding|GO:0019838,growth factor binding|GO:0005488,binding|GO:0005515,protein binding|GO:0048407,platelet-derived growth factor binding|GO:0046872,metal ion binding|GO:0042802,identical protein binding…	hsa05146,Amoebiasis|hsa04611,Platelet activation|hsa04974,Protein digestion and absorption|hsa05205,Proteoglycans in cancer|hsa04512,ECM-receptor interaction|hsa04510,Focal adhesion|hsa05165,Human papillomavirus infection|hsa04926,Relaxin signaling pathway|hsa04151,PI3K-Akt signaling pathway|hsa04933,AGE-RAGE signaling pathway in diabetic complications
P16671	0.0734548	-3.767	P16671	CD36	GO:0033157,regulation of intracellular protein transport|GO:0051169,nuclear transport|GO:0006909,phagocytosis|GO:0051049,regulation of transport|GO:0007596,blood coagulation|GO:0002702,positive regulation of production of molecular mediator of immune response|GO:0002700,regulation of production of molecular mediator of immune response|GO:0007599,hemostasis|GO:0051716,cellular response to stimulus…	GO:0009897,external side of plasma membrane|GO:0005887,integral component of plasma membrane|GO:0044421,extracellular region part|GO:0030139,endocytic vesicle|GO:0043229,intracellular organelle|GO:0071944,cell periphery|GO:0098552,side of membrane|GO:0043227,membrane-bounded organelle|GO:0043226,organelle|GO:0031224,intrinsic component of membrane|GO:0005737,cytoplasm|GO:0030667,secretory granule…	GO:0038024,cargo receptor activity|GO:0038023,signaling receptor activity|GO:0030228,lipoprotein particle receptor activity|GO:0019955,cytokine binding|GO:0060089,molecular transducer activity|GO:0044877,macromolecular complex binding|GO:0005488,binding|GO:0004871,signal transducer activity|GO:0050431,transforming growth factor beta binding|GO:0038187,pattern recognition receptor activity|GO:0019…	hsa04975,Fat digestion and absorption|hsa04979,Cholesterol metabolism|hsa03320,PPAR signaling pathway|hsa05144,Malaria|hsa04145,Phagosome|hsa04640,Hematopoietic cell lineage|hsa04512,ECM-receptor interaction|hsa04152,AMPK signaling pathway|hsa04931,Insulin resistance|hsa04920,Adipocytokine signaling pathway
P69891	0.0728968	-3.778	P69891	HBG1	GO:0051234,establishment of localization|GO:0044699,single-organism process|GO:0032501,multicellular organismal process|GO:0007599,hemostasis|GO:0044707,single-multicellular organism process|GO:0050878,regulation of body fluid levels|GO:0006950,response to stress|GO:0050896,response to stimulus|GO:0007596,blood coagulation|GO:0009611,response to wounding|GO:0042060,wound healing|GO:0015669,gas tr…	GO:0043234,protein complex|GO:0005737,cytoplasm|GO:0032991,macromolecular complex|GO:0005829,cytosol|GO:0044464,cell part|GO:0005623,cell|GO:0005833,hemoglobin complex|GO:0044444,cytoplasmic part|GO:0044445,cytosolic part|GO:0044424,intracellular part|GO:0005622,intracellular|GO:0031838,haptoglobin-hemoglobin complex	GO:0043169,cation binding|GO:0005344,oxygen transporter activity|GO:0022892,substrate-specific transporter activity|GO:0046914,transition metal ion binding|GO:0020037,heme binding|GO:0046906,tetrapyrrole binding|GO:0005215,transporter activity|GO:0043167,ion binding|GO:0019825,oxygen binding|GO:0005488,binding|GO:0097159,organic cyclic compound binding|GO:0005506,iron ion binding|GO:0046872,metal…
P30043	0.0709526	-3.817	P30043	BLVRB	GO:0006778,porphyrin-containing compound metabolic process|GO:0044248,cellular catabolic process|GO:0034641,cellular nitrogen compound metabolic process|GO:0006807,nitrogen compound metabolic process|GO:0044281,small molecule metabolic process|GO:0044699,single-organism process|GO:1901361,organic cyclic compound catabolic process|GO:0044712,single-organism catabolic process|GO:0044710,single-orga…	GO:0031974,membrane-enclosed lumen|GO:0043229,intracellular organelle|GO:0071944,cell periphery|GO:0043227,membrane-bounded organelle|GO:0043226,organelle|GO:0005737,cytoplasm|GO:0070062,extracellular exosome|GO:0031981,nuclear lumen|GO:0005634,nucleus|GO:0016020,membrane|GO:0031988,membrane-bounded vesicle|GO:0005654,nucleoplasm|GO:0005886,plasma membrane|GO:1903561,extracellular vesicle|GO:0031…	GO:0042602,riboflavin reductase (NADPH) activity|GO:0016628,oxidoreductase activity, acting on the CH-CH group of donors, NAD or NADP as acceptor|GO:0016627,oxidoreductase activity, acting on the CH-CH group of donors|GO:0016646,oxidoreductase activity, acting on the CH-NH group of donors, NAD or NADP as acceptor|GO:0016645,oxidoreductase activity, acting on the CH-NH group of donors|GO:0003824,c…	hsa00860,Porphyrin and chlorophyll metabolism|hsa00740,Riboflavin metabolism|hsa01100,Metabolic pathways
Q9NNX6	0.0666616	-3.907	Q9NNX6	CD209	GO:0034110,regulation of homotypic cell-cell adhesion|GO:0048584,positive regulation of response to stimulus|GO:0048583,regulation of response to stimulus|GO:0031349,positive regulation of defense response|GO:0007165,signal transduction|GO:0007166,cell surface receptor signaling pathway|GO:0031347,regulation of defense response|GO:0071705,nitrogen compound transport|GO:0051716,cellular response t…	GO:0071944,cell periphery|GO:0043227,membrane-bounded organelle|GO:0043226,organelle|GO:0031224,intrinsic component of membrane|GO:0005737,cytoplasm|GO:0031982,vesicle|GO:0016021,integral component of membrane|GO:0016020,membrane|GO:0031988,membrane-bounded vesicle|GO:0009986,cell surface|GO:0005886,plasma membrane|GO:1903561,extracellular vesicle|GO:0070062,extracellular exosome|GO:0043230,extra…	GO:0043169,cation binding|GO:0042277,peptide binding|GO:0005515,protein binding|GO:0042605,peptide antigen binding|GO:0033218,amide binding|GO:0030246,carbohydrate binding|GO:0043167,ion binding|GO:0046790,virion binding|GO:0048029,monosaccharide binding|GO:0003823,antigen binding|GO:0046872,metal ion binding|GO:0005537,mannose binding|GO:0005488,binding|GO:0001618,virus receptor activity|GO:0036…	hsa04625,C-type lectin receptor signaling pathway|hsa04145,Phagosome|hsa05162,Measles|hsa05152,Tuberculosis
P49747	0.0666154	-3.908	P49747	COMP	GO:0048705,skeletal system morphogenesis|GO:0048589,developmental growth|GO:0060173,limb development|GO:0060349,bone morphogenesis|GO:0060348,bone development|GO:0001501,skeletal system development|GO:0035265,organ growth|GO:0060560,developmental growth involved in morphogenesis|GO:0008219,cell death|GO:0010941,regulation of cell death|GO:0042981,regulation of apoptotic process|GO:0050789,regulat…	GO:0043230,extracellular organelle|GO:0070062,extracellular exosome|GO:0044421,extracellular region part|GO:0043227,membrane-bounded organelle|GO:0031012,extracellular matrix|GO:0043226,organelle|GO:0005576,extracellular region|GO:0005615,extracellular space|GO:0031988,membrane-bounded vesicle|GO:1903561,extracellular vesicle|GO:0065010,extracellular membrane-bounded organelle|GO:0005578,proteina…	GO:0005201,extracellular matrix structural constituent|GO:0019899,enzyme binding|GO:0005488,binding|GO:0043167,ion binding|GO:0001948,glycoprotein binding|GO:1901681,sulfur compound binding|GO:0043169,cation binding|GO:0005198,structural molecule activity|GO:0005509,calcium ion binding|GO:0002020,protease binding|GO:0032403,protein complex binding|GO:0046872,metal ion binding|GO:0043168,anion bin…	hsa04145,Phagosome|hsa04510,Focal adhesion|hsa04512,ECM-receptor interaction|hsa05144,Malaria|hsa05165,Human papillomavirus infection|hsa04151,PI3K-Akt signaling pathway
P02671	0.0665231	-3.91	P02671	FGA	GO:2001234,negative regulation of apoptotic signaling pathway|GO:0034116,positive regulation of heterotypic cell-cell adhesion|GO:2001236,regulation of extrinsic apoptotic signaling pathway|GO:2001237,negative regulation of extrinsic apoptotic signaling pathway|GO:0019220,regulation of phosphate metabolic process|GO:0080090,regulation of primary metabolic process|GO:0019222,regulation of metaboli…	GO:0009897,external side of plasma membrane|GO:0005783,endoplasmic reticulum|GO:0098552,side of membrane|GO:0031974,membrane-enclosed lumen|GO:0043229,intracellular organelle|GO:0071944,cell periphery|GO:0060205,cytoplasmic membrane-bounded vesicle lumen|GO:0043227,membrane-bounded organelle|GO:0043226,organelle|GO:0005737,cytoplasm|GO:0031983,vesicle lumen|GO:0070062,extracellular exosome|GO:003…	GO:0030674,protein binding, bridging|GO:0005198,structural molecule activity|GO:0005488,binding|GO:0005515,protein binding|GO:0005102,receptor binding|GO:0050839,cell adhesion molecule binding|GO:0060090,binding, bridging|GO:0043169,cation binding|GO:0043167,ion binding|GO:0046872,metal ion binding|GO:0005201,extracellular matrix structural constituent	hsa04611,Platelet activation|hsa04610,Complement and coagulation cascades
P02452	0.0646592	-3.951	P02452	COL1A1	GO:0001503,ossification|GO:1901700,response to oxygen-containing compound|GO:0044238,primary metabolic process|GO:2000736,regulation of stem cell differentiation|GO:0080090,regulation of primary metabolic process|GO:0019222,regulation of metabolic process|GO:0007154,cell communication|GO:2000738,positive regulation of stem cell differentiation|GO:0048584,positive regulation of response to stimulu…	GO:0005783,endoplasmic reticulum|GO:0044421,extracellular region part|GO:0031974,membrane-enclosed lumen|GO:0031012,extracellular matrix|GO:0043229,intracellular organelle|GO:0005622,intracellular|GO:0043227,membrane-bounded organelle|GO:0043226,organelle|GO:0005584,collagen type I trimer|GO:0031982,vesicle|GO:0005583,fibrillar collagen trimer|GO:0016023,cytoplasmic, membrane-bounded vesicle|GO:0…	GO:0043169,cation binding|GO:0005201,extracellular matrix structural constituent|GO:0005198,structural molecule activity|GO:0019838,growth factor binding|GO:0043167,ion binding|GO:0005488,binding|GO:0005515,protein binding|GO:0048407,platelet-derived growth factor binding|GO:0046872,metal ion binding|GO:0042802,identical protein binding|GO:0019899,enzyme binding|GO:0002020,protease binding|GO:003…	hsa05146,Amoebiasis|hsa04611,Platelet activation|hsa04974,Protein digestion and absorption|hsa05205,Proteoglycans in cancer|hsa04512,ECM-receptor interaction|hsa04510,Focal adhesion|hsa05165,Human papillomavirus infection|hsa04926,Relaxin signaling pathway|hsa04151,PI3K-Akt signaling pathway|hsa04933,AGE-RAGE signaling pathway in diabetic complications
P26447	0.0608753	-4.038	P26447	S100A4	GO:0048863,stem cell differentiation|GO:0010647,positive regulation of cell communication|GO:0048584,positive regulation of response to stimulus|GO:0048583,regulation of response to stimulus|GO:0023056,positive regulation of signaling|GO:0032501,multicellular organismal process|GO:0023052,signaling|GO:0007165,signal transduction|GO:0023051,regulation of signaling|GO:0035556,intracellular signal t…	GO:0043229,intracellular organelle|GO:0043227,membrane-bounded organelle|GO:0043226,organelle|GO:0005737,cytoplasm|GO:1903561,extracellular vesicle|GO:0031982,vesicle|GO:0005634,nucleus|GO:0031988,membrane-bounded vesicle|GO:0097458,neuron part|GO:0043005,neuron projection|GO:0048471,perinuclear region of cytoplasm|GO:0042995,cell projection|GO:0005615,extracellular space|GO:0043230,extracellular…	GO:0005488,binding|GO:0043169,cation binding|GO:0005515,protein binding|GO:0008092,cytoskeletal protein binding|GO:0097159,organic cyclic compound binding|GO:0044822,poly(A) RNA binding|GO:0048306,calcium-dependent protein binding|GO:0043167,ion binding|GO:0003779,actin binding|GO:0050786,RAGE receptor binding|GO:0005509,calcium ion binding|GO:0003676,nucleic acid binding|GO:0005102,receptor bind…
[truncated: 8 more rows]

## Sheet: Table S4. Antibodies
Protein	Company	No.	Volumn
PARP1 Polyclonal antibody	Proteintech	13371-1-AP	50ul
hnRNP A1 Monoclonal Antibody	Santa Cruz Biotechnology	sc-32301	200ug/ml
WT1 Antibody (F-6)	Santa Cruz Biotechnology	sc-7385	200ug/ml
